# Supplementary material for: Multiplatform Analysis of Primary and Metastatic Breast Tumors from the AURORA US Network identifies microenvironment and epigenetics drivers of metastasis
Source: Research Square preprint supplement (doi:10.21203/rs.3.rs-1221704/v1), 2022-01-11
Supplement: Supplementary file 1 [file 3b3e623e95ed7cf7ffc9fc51.xlsx]

## Sheet: AURORA study
Patient	Sample identifier	BCR Sample barode	BCR Portion barode	Short barcode	Coord	Study	Second aliquote - specimen level	DNA Seq FreezeSet 134	RNA Seq FreezeSet 123	DNA Methylation FreezeSet 133	Tissue type	Pairs	Sample Type	Tissue primary type treatment	Anatomic Site	Anatomic Site Simplified	Anatomic Site Groups	First Primary Receptor at diagnosis	Profiled Primary Receptor	Metastasis original receptors	Profiled ER	Profiled HER2	Profiled PR	Infered ER from RNAseq	Infered HER2 from RNAseq	Infered PR from RNAseq	Treatment status primary	Days primary diagnosis	Lines of treatment in Metastasisastasis	Days Metastasisastais diagnosis	Adj.chemotherapy.status	Adj.Endocrine therapy.status	Adj.HER2.therapy.status	TMB	Neoantigens_HLA-A	Neoantigens_HLA-B	Neoantigens_HLA-C	Neoantigens_Total	Leukocytes Fraction	HLA-A focal deletions	HLA-A HyperMe	HLA-B HyperMe	HLA-C HyperMe	TAPBP HyperMe	B2M HyperMe	Corr Basal	Corr Her2	Corr LumA	Corr LumB
AFEA	AUR_01_20_01	AUR-AFEA-TTP1-A	AUR-AFEA-TTP1-A-1-0	AUR-AFEA-TTP1	A739_E03	AURORA	Second aliquote	FALSE	TRUE	FALSE	FFPE	Paired	Primary	Pre-treatment	Breast	Breast	Breast	HR-/HER2-	HR-/HER2-	Primary	Negative	Negative	Negative	Negative	Negative	Negative	Pre-treatment	NA	Primary	Primary	Primary	Primary	Primary	NA	NA	NA	NA	NA	NA	FALSE	NA	NA	NA	NA	NA	0.715726	-0.15611	-0.536038	-0.207779
AFEA	AUR_01_20_08	AUR-AFEA-TTP2-A	AUR-AFEA-TTP2-A-1-0	AUR-AFEA-TTP2	A739_F03	AURORA		TRUE	FALSE	TRUE	FFPE	Paired	Primary	Post-treatment	Breast	Breast	Breast	NA	NA	Primary	NA	NA	NA	NA	NA	NA	Post-treatment	143	Primary	Primary	Primary	Primary	Primary	55.7862	NA	NA	NA	NA	0.0783628	FALSE	FALSE	FALSE	FALSE	FALSE	FALSE	NA	NA	NA	NA
AFEA	AUR_01_20_09	AUR-AFEA-TTM6-A	AUR-AFEA-TTM6-A-1-0	AUR-AFEA-TTM6	A739_D03	AURORA		TRUE	TRUE	TRUE	FF	Paired	Metastasis	Metastasis	Lymph node	Lymph node	Lymph node	Metastasis	Metastasis	Not Done	NA	NA	NA	Negative	Negative	Negative	Metastasis	Metastasis	NA	143	FALSE	FALSE	FALSE	134.593	NA	NA	NA	NA	0.445047	FALSE	FALSE	FALSE	FALSE	FALSE	FALSE	0.733109	0.00648259	-0.690564	-0.00292917
AFEA	AUR_01_20_06	AUR-AFEA-TTM4-A	AUR-AFEA-TTM4-A-1-1	AUR-AFEA-TTM4	A739_C03	AURORA		TRUE	TRUE	TRUE	FF	Paired	Metastasis	Metastasis	Right mediastinum	Lymph node	Lymph node	Metastasis	Metastasis	HR-/HER2-	Negative	Negative	Negative	Negative	Negative	Negative	Metastasis	Metastasis	5	1055	TRUE	FALSE	FALSE	8.2536	1	6	0	7	0.0913522	FALSE	FALSE	FALSE	FALSE	FALSE	FALSE	0.767395	0.0461465	-0.693733	-0.0582473
AFEA	AUR_01_20_05	AUR-AFEA-TTM3-A	AUR-AFEA-TTM3-A-1-1	AUR-AFEA-TTM3	A739_B03	AURORA		TRUE	TRUE	TRUE	FF	Paired	Metastasis	Metastasis	Right lower lung lobe/pleura	Lung	Lung	Metastasis	Metastasis	Not Done	NA	NA	NA	Negative	Negative	Negative	Metastasis	Metastasis	5	1055	TRUE	FALSE	FALSE	7.6569	1	3	0	4	0.268493	FALSE	FALSE	FALSE	FALSE	FALSE	FALSE	0.751357	-0.03491	-0.58569	-0.150252
AFEA	AUR_01_20_04	AUR-AFEA-TTM2-A	AUR-AFEA-TTM2-A-1-1	AUR-AFEA-TTM2	A739_A03	AURORA		TRUE	TRUE	TRUE	FF	Paired	Metastasis	Metastasis	Left cerebellum	Brain	Brain	Metastasis	Metastasis	Not Done	NA	NA	NA	Negative	Negative	Negative	Metastasis	Metastasis	5	1055	TRUE	FALSE	FALSE	9.4966	0	2	0	2	0.0199441	FALSE	FALSE	FALSE	FALSE	FALSE	FALSE	0.768451	-0.0238655	-0.6703	-0.109052
AFEA	AUR_01_20_03	AUR-AFEA-TTM1-A	AUR-AFEA-TTM1-A-1-1	AUR-AFEA-TTM1	A739_H02	AURORA		TRUE	TRUE	TRUE	FF	Paired	Metastasis	Metastasis	Right occipital	Brain	Brain	Metastasis	Metastasis	Not Done	NA	NA	NA	Negative	Negative	Negative	Metastasis	Metastasis	5	1055	TRUE	FALSE	FALSE	11.8086	1	5	0	6	0.0343163	FALSE	FALSE	FALSE	FALSE	FALSE	FALSE	0.753373	-0.116543	-0.58617	-0.344346
AFE7	AUR_01_17_02	AUR-AFE7-TTP2-A	AUR-AFE7-TTP2-A-1-1	AUR-AFE7-TTP2	A739_H01	AURORA		TRUE	TRUE	TRUE	FF	Paired	Primary	Post-treatment	Breast	Breast	Breast	HR-/HER2-	HR-/HER2-	Primary	Negative	Negative	Negative	Negative	Negative	Negative	Post-treatment	1040	Primary	Primary	Primary	Primary	Primary	11.908	6	3	4	13	0.0736089	FALSE	TRUE	FALSE	FALSE	TRUE	FALSE	0.782473	-0.237647	-0.409844	-0.41503
AFE7	AUR_01_17_06	AUR-AFE7-TTM3-A	AUR-AFE7-TTM3-A-1-1	AUR-AFE7-TTM3	A739_G01	AURORA		TRUE	TRUE	TRUE	FF	Paired	Metastasis	Metastasis	Right lower lobe lung	Lung	Lung	Metastasis	Metastasis	Not Done	NA	NA	NA	Negative	Negative	Negative	Metastasis	Metastasis	5	1040	TRUE	FALSE	FALSE	12.0323	12	5	7	24	0.133692	FALSE	TRUE	FALSE	FALSE	TRUE	FALSE	0.807731	-0.0690036	-0.578872	-0.209604
AFE7	AUR_01_17_05	AUR-AFE7-TTM2-A	AUR-AFE7-TTM2-A-1-1	AUR-AFE7-TTM2	A739_F01	AURORA		TRUE	TRUE	TRUE	FF	Paired	Metastasis	Metastasis	Right supraclavicular lymph node	Lymph node	Lymph node	Metastasis	Metastasis	Not Done	NA	NA	NA	Negative	Negative	Negative	Metastasis	Metastasis	5	1040	TRUE	FALSE	FALSE	11.3362	12	4	6	22	0.0612081	FALSE	TRUE	FALSE	FALSE	TRUE	FALSE	0.746555	-0.140072	-0.407539	-0.276255
AFE7	AUR_01_17_04	AUR-AFE7-TTM1-A	AUR-AFE7-TTM1-A-1-1	AUR-AFE7-TTM1	A739_E01	AURORA		TRUE	TRUE	TRUE	FF	Paired	Metastasis	Metastasis	Right inframammary lymph node	Lymph node	Lymph node	Metastasis	Metastasis	Not Done	NA	NA	NA	Negative	Negative	Negative	Metastasis	Metastasis	5	1040	TRUE	FALSE	FALSE	11.4357	11	2	5	18	0.0611956	FALSE	TRUE	FALSE	FALSE	TRUE	FALSE	0.816182	-0.0943577	-0.516062	-0.270972
AD9G	AUR_01_03_06	AUR-AD9G-TTP1-B	AUR-AD9G-TTP1-B-4-0	AUR-AD9G-TTP1	NA	AURORA		TRUE	TRUE	TRUE	FFPE	Paired	Primary	Pre-treatment	Breast	Breast	Breast	HR-/HER2-	HR-/HER2-	Primary	Negative	Negative	Negative	Negative	Negative	Negative	Pre-treatment	31	Primary	Primary	Primary	Primary	Primary	11.7091	NA	NA	NA	NA	0.351845	NA	FALSE	FALSE	FALSE	FALSE	FALSE	0.681248	-0.060072	-0.550636	-0.145162
AD9G	AUR_01_03_04	AUR-AD9G-TTM3-A	AUR-AD9G-TTM3-A-1-1	AUR-AD9G-TTM3	NA	AURORA		TRUE	TRUE	TRUE	FF	Paired	Metastasis	Metastasis	Adrenal	Adrenal	Others	Metastasis	Metastasis	Not Done	NA	NA	NA	Negative	Negative	Negative	Metastasis	Metastasis	4	1116	FALSE	FALSE	FALSE	14.941	NA	NA	NA	NA	0.298	NA	FALSE	FALSE	FALSE	FALSE	FALSE	0.762017	-0.0223289	-0.691909	-0.210468
AD9G	AUR_01_03_02	AUR-AD9G-TTM2-A	AUR-AD9G-TTM2-A-1-1	AUR-AD9G-TTM2	NA	AURORA		TRUE	TRUE	TRUE	FF	Paired	Metastasis	Metastasis	Left liver	Liver	Liver	Metastasis	Metastasis	Not Done	NA	NA	NA	Positive	Negative	Negative	Metastasis	Metastasis	4	1116	FALSE	FALSE	FALSE	16.0348	NA	NA	NA	NA	0.078611	NA	FALSE	FALSE	FALSE	FALSE	FALSE	0.34982	-0.067563	-0.0035054	-0.37623
AD9G	AUR_01_03_01	AUR-AD9G-TTM1-A	AUR-AD9G-TTM1-A-1-1	AUR-AD9G-TTM1	NA	AURORA		TRUE	FALSE	FALSE	FF	Paired	Metastasis	Metastasis	Liver	Liver	Liver	Metastasis	Metastasis	Not Done	NA	NA	NA	NA	NA	NA	Metastasis	Metastasis	4	1116	FALSE	FALSE	FALSE	NA	NA	NA	NA	NA	NA	NA	NA	NA	NA	NA	NA	NA	NA	NA	NA
AD9G	AUR_01_03_01	AUR-AD9G-TTM1-A	AUR-AD9G-TTM1-A-2-1	AUR-AD9G-TTM1	NA	AURORA	Second aliquote	FALSE	FALSE	TRUE	FF	Paired	Metastasis	Metastasis	Liver	Liver	Liver	Metastasis	Metastasis	Not Done	NA	NA	NA	NA	NA	NA	Metastasis	Metastasis	4	1116	FALSE	FALSE	FALSE	NA	NA	NA	NA	NA	0.21615	NA	FALSE	FALSE	FALSE	FALSE	FALSE	NA	NA	NA	NA
AFE5	AUR_01_15_01	AUR-AFE5-TTP1-A	AUR-AFE5-TTP1-A-1-0	AUR-AFE5-TTP1	A738_G12	AURORA		FALSE	TRUE	TRUE	FFPE	Paired	Primary	Post-treatment	Breast	Breast	Breast	HR+/HER2- (ER 1%)	HR+/HER2-	Primary	Positive	Negative	Positive	Positive	Negative	Positive	Post-treatment	1554	Primary	Primary	Primary	Primary	Primary	NA	NA	NA	NA	NA	0.150521	TRUE	FALSE	FALSE	FALSE	FALSE	FALSE	0.729556	-0.173109	-0.50886	-0.164658
AFE5	AUR_01_15_11	AUR-AFE5-TTM9-A	AUR-AFE5-TTM9-A-1-1	AUR-AFE5-TTM9	A738_F12	AURORA		TRUE	TRUE	TRUE	FF	Paired	Metastasis	Metastasis	Spleen	Spleen	Others	Metastasis	Metastasis	Not Done	NA	NA	NA	Negative	Negative	Negative	Metastasis	Metastasis	5	3377	TRUE	TRUE	FALSE	8.9994	5	4	5	14	0.092367	TRUE	FALSE	FALSE	FALSE	FALSE	FALSE	0.472365	-0.376615	-0.0072509	-0.623145
AFE5	AUR_01_15_10	AUR-AFE5-TTM8-A	AUR-AFE5-TTM8-A-1-1	AUR-AFE5-TTM8	A738_E12	AURORA		TRUE	FALSE	TRUE	FF	Paired	Metastasis	Metastasis	Right liver	Liver	Liver	Metastasis	Metastasis	Not Done	NA	NA	NA	NA	NA	NA	Metastasis	Metastasis	5	3377	TRUE	TRUE	FALSE	12.977	NA	NA	NA	NA	0.0681462	TRUE	FALSE	FALSE	FALSE	FALSE	FALSE	NA	NA	NA	NA
AFE5	AUR_01_15_09	AUR-AFE5-TTM7-A	AUR-AFE5-TTM7-A-1-1	AUR-AFE5-TTM7	A738_D12	AURORA		TRUE	FALSE	TRUE	FF	Paired	Metastasis	Metastasis	Peritoneum/peribronchial	Peritoneum	Others	Metastasis	Metastasis	Not Done	NA	NA	NA	NA	NA	NA	Metastasis	Metastasis	5	3377	TRUE	TRUE	FALSE	9.1485	NA	NA	NA	NA	0.0405146	TRUE	FALSE	FALSE	FALSE	FALSE	FALSE	NA	NA	NA	NA
AFE5	AUR_01_15_08	AUR-AFE5-TTM6-A	AUR-AFE5-TTM6-A-1-1	AUR-AFE5-TTM6	A738_C12	AURORA		TRUE	FALSE	TRUE	FF	Paired	Metastasis	Metastasis	Left lung	Lung	Lung	Metastasis	Metastasis	HR-/HER2-	NA	NA	NA	NA	NA	NA	Metastasis	Metastasis	5	3377	TRUE	TRUE	FALSE	7.5326	NA	NA	NA	NA	0.222519	TRUE	FALSE	FALSE	FALSE	FALSE	FALSE	NA	NA	NA	NA
AFE5	AUR_01_15_07	AUR-AFE5-TTM5-A	AUR-AFE5-TTM5-A-1-1	AUR-AFE5-TTM5	A738_B12	AURORA		TRUE	FALSE	TRUE	FF	Paired	Metastasis	Metastasis	Right diaphragm	Diaphragm	Others	Metastasis	Metastasis	Not Done	NA	NA	NA	NA	NA	NA	Metastasis	Metastasis	5	3377	TRUE	TRUE	FALSE	7.2343	NA	NA	NA	NA	0.0608276	TRUE	FALSE	FALSE	FALSE	FALSE	FALSE	NA	NA	NA	NA
AFE5	AUR_01_15_06	AUR-AFE5-TTM4-A	AUR-AFE5-TTM4-A-1-1	AUR-AFE5-TTM4	A738_A12	AURORA		TRUE	TRUE	TRUE	FF	Paired	Metastasis	Metastasis	Left axillary lymph node (contralateral)	Lymph node	Lymph node	Metastasis	Metastasis	Not Done	NA	NA	NA	Negative	Negative	Negative	Metastasis	Metastasis	5	3377	TRUE	TRUE	FALSE	7.5326	6	2	7	15	0.0643947	TRUE	FALSE	FALSE	FALSE	FALSE	FALSE	0.608259	-0.175702	-0.331573	-0.340696
AFE5	AUR_01_15_04	AUR-AFE5-TTM2-A	AUR-AFE5-TTM2-A-1-1	AUR-AFE5-TTM2	A738_H11	AURORA		TRUE	FALSE	TRUE	FF	Paired	Metastasis	Metastasis	Dura	Brain	Brain	Metastasis	Metastasis	Not Done	NA	NA	NA	NA	NA	NA	Metastasis	Metastasis	5	3377	TRUE	TRUE	FALSE	7.3835	NA	NA	NA	NA	0.034697	TRUE	FALSE	FALSE	FALSE	FALSE	FALSE	NA	NA	NA	NA
AFE5	AUR_01_15_12	AUR-AFE5-TTM10-A	AUR-AFE5-TTM10-A-1-1	AUR-AFE5-TTM10	A738_F11	AURORA		TRUE	FALSE	TRUE	FF	Paired	Metastasis	Metastasis	Kidney	Kidney	Others	Metastasis	Metastasis	Not Done	NA	NA	NA	NA	NA	NA	Metastasis	Metastasis	5	3377	TRUE	TRUE	FALSE	9.248	NA	NA	NA	NA	0.0468602	TRUE	FALSE	FALSE	FALSE	FALSE	FALSE	NA	NA	NA	NA
AFE5	AUR_01_15_03	AUR-AFE5-TTM1-A	AUR-AFE5-TTM1-A-1-1	AUR-AFE5-TTM1	A738_G11	AURORA		TRUE	FALSE	TRUE	FF	Paired	Metastasis	Metastasis	Anterior calvarium periosteum	Bone	Others	Metastasis	Metastasis	Not Done	NA	NA	NA	NA	NA	NA	Metastasis	Metastasis	5	3377	TRUE	TRUE	FALSE	9.074	NA	NA	NA	NA	0.0459183	TRUE	FALSE	FALSE	FALSE	FALSE	FALSE	NA	NA	NA	NA
AG0N	SVR-11-695_1-3	AUR-AG0N-TTP1-A	AUR-AG0N-TTP1-A-1-0	AUR-AG0N-TTP1	A739_F12	AURORA		FALSE	TRUE	TRUE	FFPE	Paired	Primary	Pre-treatment	Breast	Breast	Breast	HR-/HER2-	HR-/HER2-	Primary	Negative	Negative	Negative	Negative	Negative	Negative	Pre-treatment	13	Primary	Primary	Primary	Primary	Primary	NA	NA	NA	NA	NA	0.171035	FALSE	FALSE	FALSE	FALSE	TRUE	FALSE	0.658776	-0.0743818	-0.579928	-0.124322
AG0N	AUR_03_549-12_03	AUR-AG0N-TTM1-A	AUR-AG0N-TTM1-A-1-1	AUR-AG0N-TTM1	A739_E12	AURORA		TRUE	TRUE	TRUE	FF	Paired	Metastasis	Metastasis	Supraclavicular Lymph Node	Lymph node	Lymph node	Metastasis	Metastasis	HR-/HER2-	Negative	Negative	Negative	Negative	Negative	Negative	Metastasis	Metastasis	2	1280	TRUE	FALSE	FALSE	7.1597	12	0	0	12	0.0285127	FALSE	FALSE	FALSE	FALSE	FALSE	FALSE	0.666459	0.0370228	-0.67491	-0.0439376
AG0M	S03-48687_B_4-F-3	AUR-AG0M-TTP1-A	AUR-AG0M-TTP1-A-2-0	AUR-AG0M-TTP1	A739_C12	AURORA		FALSE	TRUE	FALSE	FFPE	Paired	Primary	Pre-treatment	Breast	Breast	Breast	HR-/HER2-	HR-/HER2-	Primary	Negative	Negative	Negative	Negative	Negative	Negative	Pre-treatment	21	Primary	Primary	Primary	Primary	Primary	NA	NA	NA	NA	NA	NA	FALSE	NA	NA	NA	NA	NA	0.503866	-0.0318367	-0.42425	-0.190204
AG0M	AUR_03_549-11_03	AUR-AG0M-TTM1-A	AUR-AG0M-TTM1-A-2-1	AUR-AG0M-TTM1	A739_B12	AURORA		TRUE	TRUE	TRUE	FF	Paired	Metastasis	Metastasis	Chest wall	Chest	Others	Metastasis	Metastasis	HR-/HER2-	Negative	Negative	Negative	Negative	Negative	Negative	Metastasis	Metastasis	2	1585	TRUE	TRUE	FALSE	4.9969	6	2	1	9	0.0377056	FALSE	FALSE	FALSE	FALSE	TRUE	FALSE	0.710828	-0.0382713	-0.657143	-0.0797599
AG0J	BS14-E19700_A4	AUR-AG0J-TTP1-A	AUR-AG0J-TTP1-A-1-0	AUR-AG0J-TTP1	A739_H11	AURORA		TRUE	TRUE	TRUE	FFPE	Paired	Primary	Pre-treatment	Breast	Breast	Breast	HR-/HER2-	HR-/HER2-	Primary	Negative	Negative	Negative	Negative	Negative	Negative	Pre-treatment	0	Primary	Primary	Primary	Primary	Primary	102.797	NA	NA	NA	NA	0.605188	FALSE	FALSE	FALSE	FALSE	TRUE	FALSE	0.576375	-0.20413	-0.502521	-0.107515
AG0J	AUR_03_549-8_03	AUR-AG0J-TTM1-A	AUR-AG0J-TTM1-A-1-0	AUR-AG0J-TTM1	A739_G11	AURORA		TRUE	TRUE	TRUE	FF	Paired	Metastasis	Metastasis	Parasternal Soft tissue mass	Soft tissue	Others	Metastasis	Metastasis	HR-/HER2-	Negative	Negative	Negative	Negative	Negative	Negative	Metastasis	Metastasis	NA	1023	TRUE	FALSE	FALSE	5.2704	2	1	0	3	0.0468816	FALSE	FALSE	FALSE	FALSE	TRUE	FALSE	0.662233	-0.0782233	-0.564946	-0.0227131
AFSP	AUR_Duke_02_20	AUR-AFSP-TTP1-A	AUR-AFSP-TTP1-A-8-0	AUR-AFSP-TTP1	A739_D08	AURORA		FALSE	TRUE	FALSE	FFPE	Paired	Primary	Pre-treatment	Breast	Breast	Breast	HR-/HER2 Unknown	HR-/HER2 Unknown	Primary	Negative	NA	Negative	Negative	Negative	Negative	Unknown	0	NA	NA	NA	NA	NA	NA	NA	NA	NA	NA	NA	FALSE	NA	NA	NA	NA	NA	0.576855	-0.348283	-0.251765	-0.461128
AFSP	AUR_Duke_02_11	AUR-AFSP-TTM1-A	AUR-AFSP-TTM1-A-8-0	AUR-AFSP-TTM1	A739_C08	AURORA		FALSE	TRUE	FALSE	FFPE	Paired	Metastasis	Metastasis	Pleura	Pleura	Others	Metastasis	Metastasis	Not Done	NA	NA	Negative	Negative	Negative	Negative	Metastasis	Metastasis	1	3914	TRUE	FALSE	FALSE	NA	NA	NA	NA	NA	NA	FALSE	NA	NA	NA	NA	NA	0.551981	-0.139208	-0.484562	0.000720288
AF9A	AUR_13_676-7_01	AUR-AF9A-TTP1-A	AUR-AF9A-TTP1-A-1-0	AUR-AF9A-TTP1	A738_D10	AURORA		TRUE	TRUE	TRUE	FFPE	Paired	Primary	Post-treatment	Breast	Breast	Breast	HR-/HER2-	HR-/HER2-	Primary	Negative	Negative	Negative	Negative	Negative	Negative	Post-treatment	153	Primary	Primary	Primary	Primary	Primary	71.1	2	6	0	8	0.085924	FALSE	FALSE	FALSE	FALSE	TRUE	FALSE	0.428091	-0.130756	-0.373061	-0.16581
AF9A	AUR_13_676-7_03	AUR-AF9A-TTM1-A	AUR-AF9A-TTM1-A-1-1	AUR-AF9A-TTM1	A738_C10	AURORA		TRUE	TRUE	TRUE	FF	Paired	Metastasis	Metastasis	Liver	Liver	Liver	Metastasis	Metastasis	HR-/HER2+	Negative	Positive	Negative	Negative	Positive	Negative	Metastasis	Metastasis	NA	739	TRUE	FALSE	FALSE	10.5904	4	13	0	17	0.0482415	FALSE	FALSE	FALSE	FALSE	TRUE	FALSE	0.650516	-0.00590636	-0.63928	-0.126915
AF98	AUR_13_676-5_01	AUR-AF98-TTP1-A	AUR-AF98-TTP1-A-1-0	AUR-AF98-TTP1	A738_F09	AURORA		TRUE	TRUE	TRUE	FFPE	Paired	Primary	Post-treatment	Breast	Breast	Breast	HR-/HER2+	HR-/HER2+	Primary	Negative	Positive	Negative	Negative	Positive	Negative	Post-treatment	5734	Primary	Primary	Primary	Primary	Primary	86.9857	2	1	0	3	0.142645	FALSE	FALSE	FALSE	FALSE	FALSE	FALSE	0.772655	-0.119435	-0.52514	-0.333237
AF98	AUR_13_676-5_03	AUR-AF98-TTM1-A	AUR-AF98-TTM1-A-1-1	AUR-AF98-TTM1	A738_E09	AURORA		TRUE	TRUE	TRUE	FF	Paired	Metastasis	Metastasis	Chest wall	Chest	Others	Metastasis	Metastasis	Not Done	NA	NA	Negative	Positive	Negative	Negative	Metastasis	Metastasis	2	874	TRUE	FALSE	TRUE	19.4655	3	0	1	4	0.372518	FALSE	FALSE	FALSE	FALSE	FALSE	FALSE	0.663481	-0.0336615	-0.47928	-0.119712
AF95	AUR_13_676-2_01	AUR-AF95-TTP1-B	AUR-AF95-TTP1-B-1-0	AUR-AF95-TTP1	NA	AURORA	Second aliquote	FALSE	FALSE	DUPLICATE	FFPE	Paired	Primary	Pre-treatment	Breast	Breast	Breast	HR-/HER2-	HR-/HER2-	Primary	NA	NA	NA	NA	NA	NA	Pre-treatment	NA	Primary	Primary	Primary	Primary	Primary	NA	NA	NA	NA	NA	NA	FALSE	NA	NA	NA	NA	NA	NA	NA	NA	NA
AF95	AUR_13_676-2_01	AUR-AF95-TTP1-A	AUR-AF95-TTP1-A-1-0	AUR-AF95-TTP1	A738_C09	AURORA		TRUE	TRUE	TRUE	FFPE	Paired	Primary	Pre-treatment	Breast	Breast	Breast	HR-/HER2-	HR-/HER2-	Primary	Negative	Negative	Negative	Negative	Negative	Negative	Pre-treatment	9999	Primary	Primary	Primary	Primary	Primary	124.475	NA	NA	NA	NA	0.676847	FALSE	FALSE	FALSE	FALSE	FALSE	FALSE	0.765474	-0.19539	-0.554574	-0.296903
AF95	AUR_13_676-2_03	AUR-AF95-TTM1-A	AUR-AF95-TTM1-A-1-1	AUR-AF95-TTM1	A738_B09	AURORA		TRUE	TRUE	TRUE	FF	Paired	Metastasis	Metastasis	Chest	Chest	Others	Metastasis	Metastasis	HR-/HER2-	Negative	Negative	Negative	Negative	Negative	Negative	Metastasis	NA	0	8516	TRUE	FALSE	FALSE	10.9633	4	0	7	11	0.0658831	FALSE	FALSE	FALSE	FALSE	FALSE	FALSE	0.740024	-0.082545	-0.54545	-0.284706
AFSL	AUR_Duke_05_27	AUR-AFSL-TTP1-A	AUR-AFSL-TTP1-A-8-0	AUR-AFSL-TTP1	A739_F07	AURORA		TRUE	TRUE	TRUE	FFPE	Paired	Primary	Post-treatment	Breast	Breast	Breast	HR-/HER2-	HR-/HER2-	Primary	Negative	Negative	Negative	Negative	Negative	Negative	Post-treatment	119	Primary	Primary	Primary	Primary	Primary	89.0739	4	0	0	4	0.0761405	FALSE	FALSE	FALSE	FALSE	FALSE	FALSE	0.72533	-0.236206	-0.481969	-0.264634
AFSL	AUR_Duke_05_18	AUR-AFSL-TTM1-A	AUR-AFSL-TTM1-A-8-0	AUR-AFSL-TTM1	A739_E07	AURORA		TRUE	TRUE	TRUE	FFPE	Paired	Metastasis	Metastasis	Lymph Node	Lymph node	Lymph node	Metastasis	Metastasis	Not Done	NA	NA	NA	Negative	Negative	Negative	Metastasis	Metastasis	NA	119	FALSE	FALSE	FALSE	93.4244	NA	NA	NA	NA	0.454151	FALSE	FALSE	FALSE	FALSE	FALSE	FALSE	0.617671	-0.163986	-0.502137	-0.140072
AFR5	AUR_06_05_01	AUR-AFR5-TTP1-A	AUR-AFR5-TTP1-A-1-1	AUR-AFR5-TTP1	A739_C07	AURORA		TRUE	TRUE	TRUE	FF	Paired	Primary	Post-treatment	Breast	Breast	Breast	HR-/HER2-	HR-/HER2-	Primary	Negative	Negative	Negative	Negative	Negative	Negative	Post-treatment	128	Primary	Primary	Primary	Primary	Primary	6.6874	NA	NA	NA	NA	0.683005	FALSE	FALSE	FALSE	FALSE	TRUE	FALSE	0.611236	0.0984874	-0.632941	-0.162449
AFR5	AUR_06_05_03	AUR-AFR5-TTM1-A	AUR-AFR5-TTM1-A-1-1	AUR-AFR5-TTM1	A739_B07	AURORA		TRUE	TRUE	TRUE	FF	Paired	Metastasis	Metastasis	Brain	Brain	Brain	Metastasis	Metastasis	HR-/HER2-	Negative	Negative	Negative	Negative	Negative	Negative	Metastasis	Metastasis	NA	409	TRUE	FALSE	FALSE	10.491	1	1	6	8	0.0802098	TRUE	FALSE	FALSE	FALSE	TRUE	FALSE	0.568019	0.228235	-0.776711	0.0812005
AE6Y	AUR_03_549-3_01	AUR-AE6Y-TTP1-A	AUR-AE6Y-TTP1-A-1-0	AUR-AE6Y-TTP1	A738_G02	AURORA		TRUE	TRUE	TRUE	FFPE	Paired	Primary	Pre-treatment	Breast	Breast	Breast	HR+/HER2-	HR+/HER2-	Primary	Positive	Negative	Positive	Positive	Negative	Positive	Pre-treatment	21	Primary	Primary	Primary	Primary	Primary	134.493	NA	NA	NA	NA	0.264592	FALSE	FALSE	FALSE	FALSE	FALSE	FALSE	0.648403	-0.12048	-0.444994	-0.346555
AE6Y	AUR_03_549-3_03	AUR-AE6Y-TTM1-A	AUR-AE6Y-TTM1-A-1-1	AUR-AE6Y-TTM1	A738_F02	AURORA		TRUE	TRUE	TRUE	FF	Paired	Metastasis	Metastasis	Lung	Lung	Lung	Metastasis	Metastasis	HR-/HER2-	Negative	Negative	Negative	Negative	Negative	Negative	Metastasis	Metastasis	NA	183	FALSE	FALSE	FALSE	8.9248	2	0	0	2	0.0316766	FALSE	FALSE	FALSE	FALSE	FALSE	FALSE	0.764994	-0.140936	-0.577431	-0.298535
AE5H	AUR-493-4-02	AUR-AE5H-TTP1-A	AUR-AE5H-TTP1-A-1-1	AUR-AE5H-TTP1	A738_A02	AURORA		TRUE	TRUE	TRUE	FF	Paired	Primary	Pre-treatment	Breast	Breast	Breast	HR-/HER2-	HR-/HER2-	Primary	Negative	Negative	Negative	Negative	Negative	Negative	Unknown	45	NA	NA	NA	NA	NA	6.6874	4	0	2	6	0.38251	FALSE	FALSE	FALSE	FALSE	TRUE	FALSE	0.74617	-0.165906	-0.519616	-0.288259
AE5H	AUR-493-4-03	AUR-AE5H-TTM1-A	AUR-AE5H-TTM1-A-1-1	AUR-AE5H-TTM1	A738_H01	AURORA		TRUE	TRUE	TRUE	FF	Paired	Metastasis	Metastasis	Skin	Skin	Others	Metastasis	Metastasis	HR-/HER2-	Negative	Negative	Negative	Negative	Negative	Negative	Metastasis	Metastasis	NA	1044	TRUE	FALSE	FALSE	7.6569	6	0	3	9	0.0354678	FALSE	TRUE	FALSE	FALSE	FALSE	FALSE	0.692485	-0.17964	-0.488115	-0.320816
AFUI	AUR_5_412-3_01	AUR-AFUI-TTP1-A	AUR-AFUI-TTP1-A-1-0	AUR-AFUI-TTP1	A739_B09	AURORA		TRUE	TRUE	TRUE	FFPE	Paired	Primary	Pre-treatment	Breast	Breast	Breast	HR-/HER2-	HR-/HER2-	Primary	Negative	Negative	Negative	Negative	Negative	Negative	Pre-treatment	29	Primary	Primary	Primary	Primary	Primary	18.3717	1	1	0	2	0.276398	FALSE	FALSE	FALSE	FALSE	FALSE	FALSE	0.321104	0.344442	-0.597887	0.172053
AFUI	AUR_5_412-3_03	AUR-AFUI-TTM1-A	AUR-AFUI-TTM1-A-1-0	AUR-AFUI-TTM1	A739_A09	AURORA		TRUE	TRUE	TRUE	FF	Paired	Metastasis	Metastasis	Chest wall	Chest	Others	Metastasis	Metastasis	HR+/HER2-	Positive	Negative	Positive	Positive	Negative	Positive	Metastasis	Metastasis	NA	162	TRUE	FALSE	FALSE	6.1405	0	1	0	1	0.335332	FALSE	FALSE	FALSE	FALSE	FALSE	FALSE	0.210276	0.322449	-0.369028	0.14497
AER7	AUR_01_12_01	AUR-AER7-TTP1-A	AUR-AER7-TTP1-A-1-0	AUR-AER7-TTP1	A738_H06	AURORA		FALSE	TRUE	FALSE	FFPE	Paired	Primary	Pre-treatment	Breast	Breast	Breast	HR-/HER2-	HR-/HER2-	Primary	Negative	Negative	Negative	Negative	Negative	Negative	Pre-treatment	35	Primary	Primary	Primary	Primary	Primary	NA	NA	NA	NA	NA	NA	FALSE	NA	NA	NA	NA	NA	0.576855	-0.38401	-0.266363	-0.349628
AER7	AUR_01_12_06	AUR-AER7-TTM4-A	AUR-AER7-TTM4-A-1-1	AUR-AER7-TTM4	A738_G06	AURORA		TRUE	TRUE	TRUE	FF	Paired	Metastasis	Metastasis	Supraclavicular lymph nodes	Lymph node	Lymph node	Metastasis	Metastasis	Not Done	NA	NA	NA	Negative	Negative	Negative	Metastasis	Metastasis	5	1154	TRUE	FALSE	FALSE	4.2759	NA	NA	NA	NA	0.348379	FALSE	FALSE	FALSE	FALSE	TRUE	FALSE	0.280096	-0.37988	0.167539	-0.585882
AER7	AUR_01_12_04	AUR-AER7-TTM2-A	AUR-AER7-TTM2-A-1-1	AUR-AER7-TTM2	A738_F06	AURORA		TRUE	FALSE	TRUE	FF	Paired	Metastasis	Metastasis	Left lung	Lung	Lung	Metastasis	Metastasis	Not Done	NA	NA	NA	NA	NA	NA	Metastasis	Metastasis	5	1154	TRUE	FALSE	FALSE	8.353	NA	NA	NA	NA	0.234301	FALSE	FALSE	FALSE	FALSE	TRUE	FALSE	NA	NA	NA	NA
AER7	AUR_01_12_03	AUR-AER7-TTM1-A	AUR-AER7-TTM1-A-1-1	AUR-AER7-TTM1	A738_E06	AURORA		TRUE	FALSE	TRUE	FF	Paired	Metastasis	Metastasis	Liver	Liver	Liver	Metastasis	Metastasis	Not Done	NA	NA	NA	NA	NA	NA	Metastasis	Metastasis	5	1154	TRUE	FALSE	FALSE	3.6047	NA	NA	NA	NA	0.418777	FALSE	FALSE	FALSE	FALSE	TRUE	FALSE	NA	NA	NA	NA
AER6	AUR_01_11_01	AUR-AER6-TTP1-A	AUR-AER6-TTP1-A-1-0	AUR-AER6-TTP1	A738_C06	AURORA		TRUE	TRUE	TRUE	FFPE	Paired	Primary	Post-treatment	Breast	Breast	Breast	HR+/HER2+	HR-/HER2 Unknown (IHC 2+, no FISH, site reported Unknown)	Primary	Negative	NA	Negative	Negative	Positive	Negative	Post-treatment	1121	Primary	Primary	Primary	Primary	Primary	78.931	NA	NA	NA	NA	0.154974	FALSE	FALSE	FALSE	FALSE	FALSE	FALSE	0.260126	0.0425941	-0.213258	-0.235108
AER6	AUR_01_11_01	AUR-AER6-TTP1-A	AUR-AER6-TTP1-A-2-0	AUR-AER6-TTP1	NA	AURORA	Second aliquote	FALSE	FALSE	DUPLICATE	FFPE	Paired	Primary	Post-treatment	Breast	Breast	Breast	HR+/HER2+	HR-/HER2 Unknown (IHC 2+, no FISH, site reported Unknown)	Primary	NA	NA	NA	NA	NA	NA	Post-treatment	1121	Primary	Primary	Primary	Primary	Primary	NA	NA	NA	NA	NA	NA	FALSE	NA	NA	NA	NA	NA	NA	NA	NA	NA
AER6	AUR_01_11_11	AUR-AER6-TTM9-A	AUR-AER6-TTM9-A-1-1	AUR-AER6-TTM9	A738_B06	AURORA		TRUE	TRUE	TRUE	FF	Paired	Metastasis	Metastasis	Liver	Liver	Liver	Metastasis	Metastasis	Not Done	NA	NA	NA	Negative	Negative	Negative	Metastasis	Metastasis	2	1479	FALSE	TRUE	TRUE	7.0603	1	1	0	2	0.269407	FALSE	FALSE	FALSE	FALSE	FALSE	FALSE	0.035006	0.321873	-0.412053	0.168499
AER6	AUR_01_11_09	AUR-AER6-TTM7-A	AUR-AER6-TTM7-A-1-1	AUR-AER6-TTM7	A738_A06	AURORA		TRUE	TRUE	TRUE	FF	Paired	Metastasis	Metastasis	Right upper arm	Soft tissue	Others	Metastasis	Metastasis	Not Done	NA	NA	NA	Negative	Negative	Negative	Metastasis	Metastasis	2	1479	FALSE	TRUE	TRUE	34.6053	NA	NA	NA	NA	0.323878	FALSE	FALSE	FALSE	FALSE	FALSE	FALSE	-0.0897479	0.291717	-0.180408	0.160528
AER6	AUR_01_11_08	AUR-AER6-TTM6-A	AUR-AER6-TTM6-A-1-1	AUR-AER6-TTM6	A738_H05	AURORA		TRUE	TRUE	TRUE	FF	Paired	Metastasis	Metastasis	Rectum	Rectum	Others	Metastasis	Metastasis	Not Done	NA	NA	NA	Negative	Negative	Positive	Metastasis	Metastasis	2	1479	FALSE	TRUE	TRUE	18.3219	0	1	0	1	0.0677392	FALSE	FALSE	FALSE	FALSE	FALSE	FALSE	-0.189532	0.0507563	0.0293397	0.0580552
AER6	AUR_01_11_07	AUR-AER6-TTM5-A	AUR-AER6-TTM5-A-1-1	AUR-AER6-TTM5	A738_G05	AURORA		TRUE	TRUE	TRUE	FF	Paired	Metastasis	Metastasis	Stomach antrum	Stomach	Others	Metastasis	Metastasis	Not Done	NA	NA	NA	Negative	Positive	Negative	Metastasis	Metastasis	2	1479	FALSE	TRUE	TRUE	6.9608	2	1	1	4	0.0759143	FALSE	FALSE	FALSE	FALSE	FALSE	FALSE	0.326579	0.327251	-0.4012	-0.142281
AER6	AUR_01_11_05	AUR-AER6-TTM3-A	AUR-AER6-TTM3-A-1-1	AUR-AER6-TTM3	A738_E05	AURORA		TRUE	TRUE	TRUE	FF	Paired	Metastasis	Metastasis	Left hemidiaphragm	Diaphragm	Others	Metastasis	Metastasis	Not Done	NA	NA	NA	Negative	Negative	Negative	Metastasis	Metastasis	2	1479	FALSE	TRUE	TRUE	6.762	0	1	0	1	0.391552	FALSE	FALSE	FALSE	FALSE	FALSE	FALSE	0.0856182	0.336471	-0.484178	0.375366
AER6	AUR_01_11_04	AUR-AER6-TTM2-A	AUR-AER6-TTM2-A-1-1	AUR-AER6-TTM2	A738_D05	AURORA		TRUE	TRUE	TRUE	FF	Paired	Metastasis	Metastasis	Left inferior thyroid	Thyroid	Others	Metastasis	Metastasis	Not Done	NA	NA	NA	Negative	Positive	Negative	Metastasis	Metastasis	2	1479	FALSE	TRUE	TRUE	7.4083	1	1	0	2	0.0381076	FALSE	TRUE	FALSE	FALSE	FALSE	FALSE	0.0352941	0.481008	-0.313037	0.0480672
AER6	AUR_01_11_12	AUR-AER6-TTM10-A	AUR-AER6-TTM10-A-1-1	AUR-AER6-TTM10	A738_B05	AURORA		TRUE	TRUE	TRUE	FF	Paired	Metastasis	Metastasis	Peritoneum	Peritoneum	Others	Metastasis	Metastasis	Not Done	NA	NA	NA	Negative	Positive	Negative	Metastasis	Metastasis	2	1479	FALSE	TRUE	TRUE	5.519	5	2	1	8	0.162705	FALSE	FALSE	FALSE	FALSE	FALSE	FALSE	-0.00436975	0.236495	-0.0157983	-0.186363
AER6	AUR_01_11_03	AUR-AER6-TTM1-A	AUR-AER6-TTM1-A-1-1	AUR-AER6-TTM1	A738_C05	AURORA		TRUE	TRUE	TRUE	FF	Paired	Metastasis	Metastasis	Right trapezius (skin)	Skin	Others	Metastasis	Metastasis	HR-/HER2-	Negative	Negative	Negative	Negative	Negative	Negative	Metastasis	Metastasis	2	1479	FALSE	TRUE	TRUE	21.1063	1	1	0	2	0.398449	FALSE	FALSE	FALSE	FALSE	FALSE	FALSE	-0.364514	0.199808	0.274814	-0.00302521
AFEC	AUR_01_22_02	AUR-AFEC-TTP2-A	AUR-AFEC-TTP2-A-1-1	AUR-AFEC-TTP2	A739_F04	AURORA		TRUE	TRUE	TRUE	FF	Paired	Primary	Post-treatment	Breast	Breast	Breast	HR-/HER2-	HR-/HER2-	Primary	Negative	Negative	Negative	Negative	Negative	Negative	Post-treatment	77	Primary	Primary	Primary	Primary	Primary	4.1268	1	0	0	1	0.355297	FALSE	FALSE	FALSE	FALSE	FALSE	FALSE	0.237743	0.301801	-0.542665	0.182329
AFEC	AUR_01_22_01	AUR-AFEC-TTP1-A	AUR-AFEC-TTP1-A-1-0	AUR-AFEC-TTP1	A739_E04	AURORA	Second aliquote	DUPLICATE	FALSE	DUPLICATE	FFPE	Paired	Primary	Pre-treatment	Breast	Breast	Breast	HR-/HER2-	HR-/HER2-	Primary	NA	NA	NA	NA	NA	NA	Pre-treatment	18	Primary	Primary	Primary	Primary	Primary	296.681	NA	NA	NA	NA	0.0981114	FALSE	FALSE	FALSE	FALSE	FALSE	FALSE	NA	NA	NA	NA
AFEC	AUR_01_22_09	AUR-AFEC-TTM6-A	AUR-AFEC-TTM6-A-1-1	AUR-AFEC-TTM6	A739_D04	AURORA		TRUE	TRUE	TRUE	FF	Paired	Metastasis	Metastasis	Left pleura	Pleura	Others	Metastasis	Metastasis	Not Done	NA	NA	NA	Negative	Negative	Negative	Metastasis	Metastasis	1	77	FALSE	FALSE	FALSE	4.5494	2	0	0	2	0.279585	FALSE	FALSE	FALSE	FALSE	FALSE	FALSE	0.170132	0.409556	-0.551116	0.207395
AFEC	AUR_01_22_08	AUR-AFEC-TTM5-A	AUR-AFEC-TTM5-A-1-1	AUR-AFEC-TTM5	A739_C04	AURORA		TRUE	FALSE	FALSE	FF	Paired	Metastasis	Metastasis	Left lung	Lung	Lung	Metastasis	Metastasis	Not Done	NA	NA	NA	NA	NA	NA	Metastasis	Metastasis	1	77	FALSE	FALSE	FALSE	4.9969	NA	NA	NA	NA	NA	FALSE	NA	NA	NA	NA	NA	NA	NA	NA	NA
AFEC	AUR_01_22_07	AUR-AFEC-TTM4-A	AUR-AFEC-TTM4-A-1-1	AUR-AFEC-TTM4	A739_B04	AURORA		TRUE	TRUE	TRUE	FF	Paired	Metastasis	Metastasis	Hilum	Lymph node	Lymph node	Metastasis	Metastasis	Not Done	NA	NA	NA	Negative	Negative	Negative	Metastasis	Metastasis	1	77	FALSE	FALSE	FALSE	3.4804	1	0	0	1	0.0763958	FALSE	FALSE	FALSE	FALSE	FALSE	FALSE	0.113469	0.383914	-0.508475	0.242545
AFEC	AUR_01_22_06	AUR-AFEC-TTM3-A	AUR-AFEC-TTM3-A-1-1	AUR-AFEC-TTM3	A739_A04	AURORA		TRUE	TRUE	TRUE	FF	Paired	Metastasis	Metastasis	Liver	Liver	Liver	Metastasis	Metastasis	Not Done	NA	NA	NA	Negative	Negative	Negative	Metastasis	Metastasis	1	77	FALSE	FALSE	FALSE	4.4002	1	0	0	1	0.0439198	FALSE	FALSE	FALSE	FALSE	FALSE	FALSE	0.0991597	0.326963	-0.422809	0.16581
AFEC	AUR_01_22_04	AUR-AFEC-TTM1-A	AUR-AFEC-TTM1-A-1-1	AUR-AFEC-TTM1	A739_H03	AURORA		TRUE	FALSE	TRUE	FF	Paired	Metastasis	Metastasis	Falciform ligament (liver)	Liver	Liver	Metastasis	Metastasis	Not Done	NA	NA	NA	NA	NA	NA	Metastasis	Metastasis	1	77	FALSE	FALSE	FALSE	6.0907	NA	NA	NA	NA	0.473297	FALSE	FALSE	FALSE	FALSE	FALSE	FALSE	NA	NA	NA	NA
AG12	AUR_03_549-19_01	AUR-AG12-TTP1-A	AUR-AG12-TTP1-A-1-0	AUR-AG12-TTP1	A740_A01	AURORA		TRUE	TRUE	FALSE	FFPE	Paired	Primary	Pre-treatment	Breast	Breast	Breast	HR-/HER2+	HR-/HER2+	Primary	Negative	Positive	Negative	Negative	Positive	Negative	Pre-treatment	0	Primary	Primary	Primary	Primary	Primary	40.9944	NA	NA	NA	NA	NA	FALSE	NA	NA	NA	NA	NA	0.178872	0.195006	-0.0334694	-0.372965
AG12	AUR_03_549-19_03	AUR-AG12-TTM1-A	AUR-AG12-TTM1-A-1-1	AUR-AG12-TTM1	A739_H12	AURORA		TRUE	TRUE	FALSE	FF	Paired	Metastasis	Metastasis	Liver	Liver	Liver	Metastasis	Metastasis	HR-/HER2+	Negative	Positive	Negative	Negative	Positive	Negative	Metastasis	Metastasis	NA	23	FALSE	FALSE	FALSE	38.2846	5	0	0	5	NA	FALSE	NA	NA	NA	NA	NA	0.187803	0.718896	-0.485138	0.201633
AERX	AUR_03_549-6_01	AUR-AERX-TTP1-A	AUR-AERX-TTP1-A-1-0	AUR-AERX-TTP1	A738_B08	AURORA		TRUE	TRUE	TRUE	FFPE	Paired	Primary	Pre-treatment	Breast	Breast	Breast	HR+/HER2 Unknown	HR-/HER2+	Primary	Negative	Positive	Negative	Negative	Positive	Negative	Pre-treatment	4027	Primary	Primary	Primary	Primary	Primary	47.7564	NA	NA	NA	NA	0.118285	TRUE	FALSE	FALSE	FALSE	FALSE	FALSE	-0.0948379	0.573974	-0.138824	0.214982
AERX	AUR_03_549-6_03	AUR-AERX-TTM1-A	AUR-AERX-TTM1-A-1-1	AUR-AERX-TTM1	A738_A08	AURORA		FALSE	TRUE	FALSE	FF	Paired	Metastasis	Metastasis	Liver	Liver	Liver	Metastasis	Metastasis	HR-/HER2+	Negative	Positive	Negative	Negative	Positive	Negative	Metastasis	Metastasis	0	4070	FALSE	FALSE	FALSE	NA	2	0	0	2	NA	FALSE	NA	NA	NA	NA	NA	-0.0614166	0.696038	-0.362401	0.472845
AERW	AUR_03_549-5_07	AUR-AERW-TTP1-C	AUR-AERW-TTP1-C-1-0	AUR-AERW-TTP1	NA	AURORA	Second aliquote	FALSE	FALSE	DUPLICATE	FFPE	Paired	Primary	Post-treatment	Breast	Breast	Breast	HR-/HER2+	HR-/HER2+	Primary	NA	NA	NA	NA	NA	NA	Post-treatment	NA	Primary	Primary	Primary	Primary	Primary	NA	NA	NA	NA	NA	NA	FALSE	NA	NA	NA	NA	NA	NA	NA	NA	NA
AERW	AUR_03_549-5_05	AUR-AERW-TTP1-B	AUR-AERW-TTP1-B-1-0	AUR-AERW-TTP1	A738_G07	AURORA		TRUE	TRUE	TRUE	FFPE	Paired	Primary	Post-treatment	Breast	Breast	Breast	HR-/HER2+	HR-/HER2+	Primary	Negative	Positive	Negative	Negative	Positive	Negative	Post-treatment	311	Primary	Primary	Primary	Primary	Primary	95.5624	NA	NA	NA	NA	0.200143	FALSE	FALSE	FALSE	FALSE	FALSE	FALSE	0.18886	0.180312	0.0318367	-0.395342
AERW	AUR_03_549-5_03	AUR-AERW-TTM1-A	AUR-AERW-TTM1-A-1-1	AUR-AERW-TTM1	A738_F07	AURORA		TRUE	TRUE	FALSE	FF	Paired	Metastasis	Metastasis	Skin	Chest	Others	Metastasis	Metastasis	HR-/HER2+	Negative	Positive	Negative	Negative	Positive	Negative	Metastasis	Metastasis	1	475	FALSE	FALSE	FALSE	36.445	NA	NA	NA	NA	NA	FALSE	NA	NA	NA	NA	NA	0.122977	0.510012	-0.231981	-0.0290516
AFSO	AUR_Duke_01_20	AUR-AFSO-TTP1-A	AUR-AFSO-TTP1-A-8-0	AUR-AFSO-TTP1	A739_A08	AURORA		FALSE	TRUE	TRUE	FFPE	Paired	Primary	Pre-treatment	Breast	Breast	Breast	HR+/HER2 Unknown	HR+/HER2 Unknown	Primary	Positive	NA	Positive	Positive	Positive	Positive	Pre-treatment	1946	Primary	Primary	Primary	Primary	Primary	NA	NA	NA	NA	NA	0.264828	FALSE	FALSE	FALSE	FALSE	FALSE	FALSE	-0.00187275	0.655126	-0.396591	0.340408
AFSO	AUR_Duke_01_11	AUR-AFSO-TTM1-A	AUR-AFSO-TTM1-A-8-0	AUR-AFSO-TTM1	A739_H07	AURORA		TRUE	TRUE	TRUE	FFPE	Paired	Metastasis	Metastasis	Brain	Brain	Brain	Metastasis	Metastasis	Not Done	NA	NA	NA	Negative	Positive	Negative	Metastasis	Metastasis	1	1409	TRUE	TRUE	TRUE	17.4767	3	0	2	5	0.266663	FALSE	FALSE	FALSE	FALSE	FALSE	FALSE	0.23006	0.542857	-0.472941	0.237647
AFR3	AUR_06_02_01	AUR-AFR3-TTP1-A	AUR-AFR3-TTP1-A-2-1	AUR-AFR3-TTP1	A739_E06	AURORA		TRUE	TRUE	TRUE	FF	Paired	Primary	Pre-treatment	Breast	Breast	Breast	HR+/HER2-	HR+/HER2-	Primary	Positive	Negative	Positive	Positive	Negative	Positive	Pre-treatment	58	Primary	Primary	Primary	Primary	Primary	6.4636	1	1	0	2	0.0742716	FALSE	FALSE	FALSE	FALSE	FALSE	FALSE	0.0937815	0.298055	-0.545546	0.483409
AFR3	AUR_06_02_03	AUR-AFR3-TTM1-A	AUR-AFR3-TTM1-A-1-1	AUR-AFR3-TTM1	A739_D06	AURORA		TRUE	TRUE	TRUE	FF	Paired	Metastasis	Metastasis	Brain	Brain	Brain	Metastasis	Metastasis	HR-/HER2+	Negative	Positive	Negative	Negative	Positive	Negative	Metastasis	Metastasis	NA	855	TRUE	TRUE	FALSE	6.9608	2	3	0	5	0.0209111	FALSE	FALSE	FALSE	FALSE	FALSE	FALSE	0.360288	0.536999	-0.725714	0.372869
AE5G	AUR-493-1-02	AUR-AE5G-TTP1-A	AUR-AE5G-TTP1-A-1-1	AUR-AE5G-TTP1	A738_F01	AURORA		TRUE	TRUE	TRUE	FF	Paired	Primary	Pre-treatment	Breast	Breast	Breast	HR+/HER2+	HR+/HER2+	Primary	Positive	Positive	Positive	Positive	Positive	Positive	Unknown	567	NA	NA	NA	NA	NA	6.0162	1	0	0	1	0.248367	FALSE	FALSE	FALSE	FALSE	FALSE	FALSE	-0.00965186	0.623529	-0.337431	0.443073
AE5G	AUR-493-1-03	AUR-AE5G-TTM1-A	AUR-AE5G-TTM1-A-1-1	AUR-AE5G-TTM1	A738_E01	AURORA		TRUE	TRUE	TRUE	FF	Paired	Metastasis	Metastasis	Brain	Brain	Brain	Metastasis	Metastasis	Not Done	NA	NA	NA	Positive	Positive	Positive	Metastasis	Metastasis	5	1239	FALSE	FALSE	FALSE	7.1597	2	0	0	2	0.0122747	FALSE	FALSE	FALSE	FALSE	FALSE	FALSE	-0.129796	0.497047	-0.339256	0.565138
AF94	AUR_13_676-1_01	AUR-AF94-TTP1-A	AUR-AF94-TTP1-A-1-0	AUR-AF94-TTP1	A738_H08	AURORA		TRUE	TRUE	TRUE	FFPE	Paired	Primary	Pre-treatment	Breast	Breast	Breast	HR+/HER2-	HR+/HER2-	Primary	Positive	Negative	Positive	Positive	Negative	Positive	Pre-treatment	2255	Primary	Primary	Primary	Primary	Primary	106.252	NA	NA	NA	NA	0.191904	FALSE	FALSE	FALSE	FALSE	FALSE	FALSE	-0.425978	0.116639	0.373733	0.389004
AF94	AUR_13_676-1_03	AUR-AF94-TTM1-A	AUR-AF94-TTM1-A-1-1	AUR-AF94-TTM1	A738_G08	AURORA		TRUE	TRUE	TRUE	FF	Paired	Metastasis	Metastasis	Liver	Liver	Liver	Metastasis	Metastasis	HR+/HER2-	Positive	Negative	Positive	Positive	Negative	Positive	Metastasis	Metastasis	NA	876	TRUE	TRUE	FALSE	7.6818	5	7	2	14	0.0346524	FALSE	FALSE	FALSE	FALSE	FALSE	FALSE	-0.491477	0.418295	0.14958	0.582905
AFE4	AUR_01_14_01	AUR-AFE4-TTP1-A	AUR-AFE4-TTP1-A-1-0	AUR-AFE4-TTP1	A738_D11	AURORA		TRUE	TRUE	FALSE	FFPE	Paired	Primary	Pre-treatment	Breast	Breast	Breast	HR+/HER2+	HR+/HER2+	Primary	Positive	Positive	Positive	Positive	Positive	Positive	Pre-treatment	38	Primary	Primary	Primary	Primary	Primary	167.483	NA	NA	NA	NA	NA	TRUE	NA	NA	NA	NA	NA	-0.0636255	0.0971429	0.0769748	-0.0739976
AFE4	AUR_01_14_08	AUR-AFE4-TTM6-A	AUR-AFE4-TTM6-A-1-1	AUR-AFE4-TTM6	A738_C11	AURORA		TRUE	TRUE	TRUE	FF	Paired	Metastasis	Metastasis	Right inferior lobe liver	Liver	Liver	Metastasis	Metastasis	Not Done	NA	NA	NA	Positive	Negative	Positive	Metastasis	Metastasis	2	1466	TRUE	TRUE	TRUE	15.2144	4	2	3	9	0.0268998	FALSE	TRUE	FALSE	FALSE	FALSE	FALSE	-0.516351	0.124898	0.227563	0.500984
AFE4	AUR_01_14_07	AUR-AFE4-TTM5-A	AUR-AFE4-TTM5-A-1-1	AUR-AFE4-TTM5	A738_B11	AURORA		TRUE	TRUE	TRUE	FF	Paired	Metastasis	Metastasis	Pericardial	Pericardium	Others	Metastasis	Metastasis	Not Done	NA	NA	NA	Positive	Negative	Positive	Metastasis	Metastasis	2	1466	TRUE	TRUE	TRUE	15.5127	1	1	2	4	0.156865	FALSE	TRUE	FALSE	FALSE	FALSE	FALSE	-0.500984	0.0851381	0.367299	0.154094
AFE4	AUR_01_14_06	AUR-AFE4-TTM4-A	AUR-AFE4-TTM4-A-1-1	AUR-AFE4-TTM4	A738_A11	AURORA		TRUE	FALSE	TRUE	FF	Paired	Metastasis	Metastasis	Peripancreatic (head)	Pancreas	Others	Metastasis	Metastasis	Not Done	NA	NA	NA	NA	NA	NA	Metastasis	Metastasis	2	1466	TRUE	TRUE	TRUE	17.3275	NA	NA	NA	NA	0.0284235	FALSE	TRUE	FALSE	FALSE	FALSE	FALSE	NA	NA	NA	NA
AFE4	AUR_01_14_05	AUR-AFE4-TTM3-A	AUR-AFE4-TTM3-A-1-1	AUR-AFE4-TTM3	A738_H10	AURORA		TRUE	FALSE	TRUE	FF	Paired	Metastasis	Metastasis	Right lower lobe lung	Lung	Lung	Metastasis	Metastasis	HR+/HER2-	NA	NA	NA	NA	NA	NA	Metastasis	Metastasis	2	1466	TRUE	TRUE	TRUE	15.3884	NA	NA	NA	NA	0.289827	FALSE	TRUE	FALSE	FALSE	FALSE	FALSE	NA	NA	NA	NA
AFE4	AUR_01_14_04	AUR-AFE4-TTM2-A	AUR-AFE4-TTM2-A-1-1	AUR-AFE4-TTM2	A738_G10	AURORA		TRUE	FALSE	TRUE	FF	Paired	Metastasis	Metastasis	Mediastinum	Lymph node	Lymph node	Metastasis	Metastasis	Not Done	NA	NA	NA	NA	NA	NA	Metastasis	Metastasis	2	1466	TRUE	TRUE	TRUE	17.4021	NA	NA	NA	NA	0.0632043	FALSE	TRUE	FALSE	FALSE	FALSE	FALSE	NA	NA	NA	NA
AFE4	AUR_01_14_03	AUR-AFE4-TTM1-A	AUR-AFE4-TTM1-A-1-1	AUR-AFE4-TTM1	A738_F10	AURORA		TRUE	TRUE	TRUE	FF	Paired	Metastasis	Metastasis	Left upper lobe lung	Lung	Lung	Metastasis	Metastasis	Not Done	NA	NA	NA	Positive	Negative	Positive	Metastasis	Metastasis	2	1466	TRUE	TRUE	TRUE	12.7533	1	0	1	2	0.297579	FALSE	FALSE	FALSE	FALSE	FALSE	FALSE	-0.561393	-0.0218487	0.509052	0.157647
AFUN	AUR_5_412-8	AUR-AFUN-TTP1-B	AUR-AFUN-TTP1-B-1-0	AUR-AFUN-TTP1	NA	AURORA	Second aliquote	FALSE	FALSE	DUPLICATE	FFPE	Paired	Primary	Pre-treatment	Breast	Breast	Breast	HR+/HER2-	HR+/HER2-	Primary	NA	NA	NA	NA	NA	NA	Pre-treatment	22	Primary	Primary	Primary	Primary	Primary	NA	1	0	0	1	NA	FALSE	NA	NA	NA	NA	NA	NA	NA	NA	NA
AFUN	AUR_5_412-8_01	AUR-AFUN-TTP1-A	AUR-AFUN-TTP1-A-1-0	AUR-AFUN-TTP1	A739_G10	AURORA		TRUE	TRUE	TRUE	FFPE	Paired	Primary	Pre-treatment	Breast	Breast	Breast	HR+/HER2-	HR+/HER2-	Primary	Positive	Negative	Positive	Positive	Negative	Positive	Pre-treatment	22	Primary	Primary	Primary	Primary	Primary	142.623	1	0	0	1	0.0757831	FALSE	FALSE	FALSE	FALSE	TRUE	FALSE	-0.588475	-0.22401	0.65551	0.103289
AFUN	AUR_5_412-8_03	AUR-AFUN-TTM1-A	AUR-AFUN-TTM1-A-1-0	AUR-AFUN-TTM1	A739_F10	AURORA		TRUE	TRUE	TRUE	FF	Paired	Metastasis	Metastasis	Uterus	Uterus	Others	Metastasis	Metastasis	HR+/HER2-	Positive	Negative	Positive	Positive	Negative	Positive	Metastasis	Metastasis	NA	3750	TRUE	TRUE	FALSE	15.2393	NA	NA	NA	NA	0.0545272	FALSE	FALSE	FALSE	FALSE	FALSE	FALSE	-0.470156	-0.233517	0.692389	-0.084946
AFUL	AUR_5_412-6_01	AUR-AFUL-TTP1-A	AUR-AFUL-TTP1-A-1-1	AUR-AFUL-TTP1	A739_A10	AURORA		FALSE	TRUE	TRUE	FF	Paired	Primary	Pre-treatment	Breast	Breast	Breast	HR+/HER2-	HR+/HER2-	Primary	Positive	Negative	Positive	Positive	Negative	Positive	Pre-treatment	26	Primary	Primary	Primary	Primary	Primary	NA	NA	NA	NA	NA	0.39966	NA	FALSE	FALSE	FALSE	FALSE	FALSE	-0.336567	-0.482545	0.63102	-0.20048
AFUL	AUR_5_412-6_03	AUR-AFUL-TTM1-A	AUR-AFUL-TTM1-A-1-1	AUR-AFUL-TTM1	A739_H09	AURORA		FALSE	TRUE	TRUE	FF	Paired	Metastasis	Metastasis	Ovary	Ovary	Others	Metastasis	Metastasis	HR+/HER2-	Positive	Negative	Positive	Positive	Negative	Positive	Metastasis	Metastasis	3	2227	TRUE	TRUE	FALSE	NA	NA	NA	NA	NA	0.054919	NA	FALSE	FALSE	FALSE	FALSE	FALSE	-0.585978	-0.207011	0.767971	-0.0540216
AFKB	AUR_500-04-01	AUR-AFKB-TTP1-B	AUR-AFKB-TTP1-B-10-0	AUR-AFKB-TTP1	NA	AURORA	Second aliquote	FALSE	FALSE	DUPLICATE	FFPE	Paired	Primary	Pre-treatment	Breast	Breast	Breast	HR Unknown/HER2 Unknown	HR+/HER2 Unknown	Primary	NA	NA	NA	NA	NA	NA	Pre-treatment	6774	Primary	Primary	Primary	Primary	Primary	NA	NA	NA	NA	NA	NA	FALSE	NA	NA	NA	NA	NA	NA	NA	NA	NA
AFKB	AUR-_500_04_01	AUR-AFKB-TTP1-A	AUR-AFKB-TTP1-A-10-0	AUR-AFKB-TTP1	A739_A05	AURORA		TRUE	TRUE	TRUE	FFPE	Paired	Primary	Pre-treatment	Breast	Breast	Breast	HR Unknown/HER2 Unknown	HR+/HER2 Unknown	Primary	Positive	NA	Positive	Positive	Negative	Positive	Pre-treatment	6774	Primary	NA	NA	NA	NA	163.381	NA	NA	NA	NA	0.106832	FALSE	FALSE	FALSE	FALSE	FALSE	FALSE	-0.436831	-0.461993	0.717743	-0.0953181
AFKB	AUR-_500_04_02	AUR-AFKB-TTM1-A	AUR-AFKB-TTM1-A-1-1	AUR-AFKB-TTM1	A739_H04	AURORA		TRUE	TRUE	TRUE	FF	Paired	Metastasis	Metastasis	Bone	Bone	Others	Metastasis	Metastasis	HR+/HER2-	Positive	Negative	Positive	Positive	Negative	Positive	Metastasis	Metastasis	3	11233	TRUE	FALSE	FALSE	5.7676	1	3	2	6	0.00210342	FALSE	FALSE	FALSE	FALSE	FALSE	FALSE	-0.523649	0.0606483	0.3697	0.446146
AEPZ	AUR_500_02_01	AUR-AEPZ-TTP1-A	AUR-AEPZ-TTP1-A-1-1	AUR-AEPZ-TTP1	A738_B03	AURORA		TRUE	TRUE	TRUE	FF	Paired	Primary	Pre-treatment	Breast	Breast	Breast	HR+/HER2-	HR+/HER2-	Primary	Positive	Negative	Positive	Positive	Negative	Positive	Pre-treatment	32	Primary	Primary	Primary	Primary	Primary	6.4139	NA	NA	NA	NA	0.0320659	FALSE	FALSE	FALSE	FALSE	FALSE	FALSE	-0.439424	-0.414358	0.782761	-0.353758
AEPZ	AUR_500_02_02	AUR-AEPZ-TTM1-A	AUR-AEPZ-TTM1-A-1-1	AUR-AEPZ-TTM1	A738_A03	AURORA		TRUE	TRUE	TRUE	FF	Paired	Metastasis	Metastasis	Ovary	Ovary	Others	Metastasis	Metastasis	HR+/HER2-	Positive	Negative	Positive	Positive	Negative	Positive	Metastasis	Metastasis	NA	661	TRUE	TRUE	FALSE	5.0218	2	1	0	3	0.0161116	FALSE	FALSE	FALSE	FALSE	FALSE	FALSE	-0.629484	-0.157743	0.737143	0.0995438
AER8	AUR_01_13_01	AUR-AER8-TTP1-A	AUR-AER8-TTP1-A-1-0	AUR-AER8-TTP1	A738_D07	AURORA		TRUE	TRUE	TRUE	FFPE	Paired	Primary	Post-treatment	Breast	Breast	Breast	HR+/HER2-	HR+/HER2-	Primary	Positive	Negative	Positive	Positive	Negative	Positive	Post-treatment	280	Primary	Primary	Primary	Primary	Primary	122.213	5	4	1	10	0.0725073	FALSE	FALSE	FALSE	FALSE	FALSE	FALSE	-0.427611	-0.306218	0.73599	-0.179064
AER8	AUR_01_13_04	AUR-AER8-TTM2-A	AUR-AER8-TTM2-A-1-1	AUR-AER8-TTM2	A738_C07	AURORA		TRUE	TRUE	TRUE	FF	Paired	Metastasis	Metastasis	Right liver	Liver	Liver	Metastasis	Metastasis	HR+/HER2-	Positive	Negative	Positive	Positive	Negative	Positive	Metastasis	Metastasis	3	866	FALSE	TRUE	FALSE	11.5102	9	1	0	10	0.072665	FALSE	TRUE	FALSE	FALSE	FALSE	FALSE	-0.350972	0.387275	-0.0185834	0.321008
AER8	AUR_01_13_03	AUR-AER8-TTM1-A	AUR-AER8-TTM1-A-1-1	AUR-AER8-TTM1	A738_B07	AURORA		TRUE	FALSE	TRUE	FF	Paired	Metastasis	Metastasis	Left liver	Liver	Liver	Metastasis	Metastasis	HR+/HER2-	NA	NA	NA	NA	NA	NA	Metastasis	Metastasis	3	866	FALSE	TRUE	FALSE	14.394	NA	NA	NA	NA	0.0523613	FALSE	TRUE	FALSE	FALSE	FALSE	FALSE	NA	NA	NA	NA
AFKF	AUR_500_03_01	AUR-AFKF-TTP1-A	AUR-AFKF-TTP1-A-10-0	AUR-AFKF-TTP1	A739_G05	AURORA		TRUE	TRUE	TRUE	FFPE	Paired	Primary	Unknown	Breast	Breast	Breast	HR+/HER2-	HR+/HER2-	Primary	Positive	Negative	Positive	Positive	Negative	Positive	Unknown	1683	Primary	Primary	Primary	Primary	Primary	119.378	4	0	0	4	0.0121523	FALSE	FALSE	FALSE	FALSE	FALSE	FALSE	-0.381609	-0.047587	0.501849	-0.0385594
AFKF	AUR_500_03_02	AUR-AFKF-TTM1-A	AUR-AFKF-TTM1-A-1-1	AUR-AFKF-TTM1	A739_F05	AURORA		TRUE	TRUE	TRUE	FF	Paired	Metastasis	Metastasis	Brain	Brain	Brain	Metastasis	Metastasis	HR+/HER2-	Positive	Negative	Positive	Positive	Negative	Positive	Metastasis	Metastasis	NA	1863	FALSE	FALSE	FALSE	30.8514	39	9	24	72	0.0257364	FALSE	FALSE	FALSE	FALSE	FALSE	FALSE	-0.286627	0.540168	-0.0534454	0.46449
AFUM	AUR_5_412-7_01	AUR-AFUM-TTP1-A	AUR-AFUM-TTP1-A-1-0	AUR-AFUM-TTP1	A739_D10	AURORA		TRUE	TRUE	FALSE	FFPE	Paired	Primary	Post-treatment	Breast	Breast	Breast	HR-/HER2-	HR-/HER2-	Primary	Negative	Negative	Negative	Negative	Negative	Negative	Post-treatment	71	Primary	Primary	Primary	Primary	Primary	142.399	NA	NA	NA	NA	NA	FALSE	NA	NA	NA	NA	NA	-0.178583	-0.622569	0.511837	-0.2703
AFUM	AUR_5_412-7_03	AUR-AFUM-TTM1-A	AUR-AFUM-TTM1-A-1-1	AUR-AFUM-TTM1	A739_C10	AURORA		TRUE	TRUE	TRUE	FF	Paired	Metastasis	Metastasis	Spine	Bone	Others	Metastasis	Metastasis	HR+/HER2-	Negative	Negative	Negative	Negative	Negative	Negative	Metastasis	Metastasis	4	1353	TRUE	FALSE	FALSE	8.353	4	1	0	5	0.0340808	FALSE	TRUE	FALSE	TRUE	TRUE	FALSE	0.545642	0.170132	-0.737623	0.146122
AFE9	AUR_01_19_01	AUR-AFE9-TTP1-A	AUR-AFE9-TTP1-A-1-0	AUR-AFE9-TTP1	A739_F02	AURORA		TRUE	TRUE	FALSE	FFPE	Paired	Primary	Pre-treatment	Breast	Breast	Breast	HR+/HER2-	HR+/HER2-	Primary	Positive	Negative	Positive	Positive	Negative	Positive	Pre-treatment	0	Primary	Primary	Primary	Primary	Primary	240.174	NA	NA	NA	NA	NA	TRUE	NA	NA	NA	NA	NA	-0.422041	-0.263962	0.451044	0.215174
AFE9	AUR_01_19_06	AUR-AFE9-TTM4-A	AUR-AFE9-TTM4-A-1-1	AUR-AFE9-TTM4	A739_E02	AURORA		TRUE	TRUE	TRUE	FF	Paired	Metastasis	Metastasis	Liver	Liver	Liver	Metastasis	Metastasis	HR-/HER2-	Negative	Negative	Negative	Negative	Negative	Negative	Metastasis	Metastasis	5	2691	TRUE	TRUE	FALSE	7.6072	NA	NA	NA	NA	0.203628	FALSE	FALSE	FALSE	FALSE	FALSE	FALSE	-0.492437	-0.209028	0.514622	0.0612245
AFE9	AUR_01_19_05	AUR-AFE9-TTM3-A	AUR-AFE9-TTM3-A-1-1	AUR-AFE9-TTM3	A739_D02	AURORA		TRUE	TRUE	TRUE	FF	Paired	Metastasis	Metastasis	Adrenal	Adrenal	Others	Metastasis	Metastasis	Not Done	NA	NA	NA	Positive	Negative	Positive	Metastasis	Metastasis	5	2691	TRUE	TRUE	FALSE	8.4027	NA	NA	NA	NA	0.0897322	FALSE	FALSE	FALSE	FALSE	FALSE	FALSE	-0.291909	-0.42982	0.531044	-0.0232893
AFE9	AUR_01_19_04	AUR-AFE9-TTM2-A	AUR-AFE9-TTM2-A-1-1	AUR-AFE9-TTM2	A739_C02	AURORA		TRUE	TRUE	FALSE	FF	Paired	Metastasis	Metastasis	Lung	Lung	Lung	Metastasis	Metastasis	Not Done	NA	NA	NA	Negative	Negative	Positive	Metastasis	Metastasis	5	2691	TRUE	TRUE	FALSE	3.7539	NA	NA	NA	NA	NA	FALSE	NA	NA	NA	NA	NA	-0.175798	-0.299784	0.460744	-0.242737
AFE9	AUR_01_19_03	AUR-AFE9-TTM1-A	AUR-AFE9-TTM1-A-1-1	AUR-AFE9-TTM1	A739_B02	AURORA		TRUE	TRUE	TRUE	FF	Paired	Metastasis	Metastasis	Brain	Brain	Brain	Metastasis	Metastasis	Not Done	NA	NA	NA	Positive	Negative	Positive	Metastasis	Metastasis	5	2691	TRUE	TRUE	FALSE	7.8061	8	2	1	11	0.0343246	FALSE	TRUE	FALSE	FALSE	FALSE	FALSE	-0.242833	-0.231212	0.300648	0.260408
AER2	AUR_01_07_01	AUR-AER2-TTP1-A	AUR-AER2-TTP1-A-1-1	AUR-AER2-TTP1	A738_F03	AURORA		TRUE	TRUE	TRUE	FF	Paired	Primary	Post-treatment	Breast	Breast	Breast	HR+/HER2 Unknown	HR+/HER2 Unknown	Primary	Positive	NA	Positive	Positive	Negative	Positive	Post-treatment	7955	Primary	Primary	Primary	Primary	Primary	41.5413	49	55	12	116	0.0642022	FALSE	TRUE	TRUE	FALSE	FALSE	TRUE	-0.30958	-0.0817767	0.019928	0.310348
AER2	AUR_01_07_05	AUR-AER2-TTM3-A	AUR-AER2-TTM3-A-1-1	AUR-AER2-TTM3	A738_E03	AURORA		TRUE	TRUE	TRUE	FF	Paired	Metastasis	Metastasis	Soft Tissue	Soft tissue	Others	Metastasis	Metastasis	HR+/HER2-	Positive	Negative	Positive	Positive	Negative	Positive	Metastasis	Metastasis	20	7955	FALSE	TRUE	FALSE	40.9198	13	19	3	35	0.204152	FALSE	TRUE	TRUE	FALSE	FALSE	TRUE	-0.178007	-0.319472	0.204802	-0.241969
AER2	AUR_01_07_03	AUR-AER2-TTM1-A	AUR-AER2-TTM1-A-1-1	AUR-AER2-TTM1	A738_D03	AURORA		TRUE	TRUE	TRUE	FF	Paired	Metastasis	Metastasis	Liver	Liver	Liver	Metastasis	Metastasis	Not Done	NA	NA	NA	Positive	Negative	Positive	Metastasis	Metastasis	20	7955	FALSE	TRUE	FALSE	41.2679	57	63	12	132	0.0264352	FALSE	TRUE	TRUE	FALSE	FALSE	FALSE	-0.278655	-0.234382	0.135846	0.34934
AFE6	AUR_01_16_01	AUR-AFE6-TTP1-A	AUR-AFE6-TTP1-A-1-0	AUR-AFE6-TTP1	A739_C01	AURORA		TRUE	TRUE	FALSE	FFPE	Paired	Primary	Post-treatment	Breast	Breast	Breast	HR+/HER2+ (PR 2%)	HR+/HER2+	Primary	Positive	Positive	Positive	Positive	Positive	Positive	Post-treatment	84	Primary	Primary	Primary	Primary	Primary	86.9857	NA	NA	NA	NA	NA	FALSE	NA	NA	NA	NA	NA	0.417911	-0.273277	-0.082545	-0.415126
AFE6	AUR_01_16_01	AUR-AFE6-TTP1-A	AUR-AFE6-TTP1-A-3-0	AUR-AFE6-TTP1	NA	AURORA	Second aliquote	FALSE	FALSE	TRUE	FFPE	Paired	Primary	Post-treatment	Breast	Breast	Breast	HR+/HER2+ (PR 2%)	HR+/HER2+	Primary	NA	NA	NA	NA	NA	NA	Post-treatment	84	Primary	Primary	Primary	Primary	Primary	NA	NA	NA	NA	NA	NA	FALSE	NA	NA	NA	NA	NA	NA	NA	NA	NA
AFE6	AUR_01_16_04	AUR-AFE6-TTM2-A	AUR-AFE6-TTM2-A-1-1	AUR-AFE6-TTM2	A739_B01	AURORA		TRUE	TRUE	TRUE	FF	Paired	Metastasis	Metastasis	Right lower lobe lung	Lung	Lung	Metastasis	Metastasis	Not Done	NA	NA	NA	Negative	Negative	Negative	Metastasis	Metastasis	NA	400	TRUE	TRUE	TRUE	9.5463	6	0	0	6	0.26028	FALSE	TRUE	FALSE	FALSE	FALSE	FALSE	0.453541	-0.00283313	-0.591645	-0.00456182
AFE6	AUR_01_16_03	AUR-AFE6-TTM1-A	AUR-AFE6-TTM1-A-1-1	AUR-AFE6-TTM1	A739_A01	AURORA		TRUE	TRUE	TRUE	FF	Paired	Metastasis	Metastasis	Soft tissue from anterior thorax/chest	Chest	Others	Metastasis	Metastasis	Not Done	NA	NA	NA	Negative	Negative	Negative	Metastasis	Metastasis	NA	400	TRUE	TRUE	TRUE	8.9497	3	3	0	6	0.0736158	FALSE	TRUE	FALSE	FALSE	TRUE	FALSE	0.449316	0.116639	-0.622281	0.0657383
AFR4	AUR_06_03_01	AUR-AFR4-TTP1-A	AUR-AFR4-TTP1-A-1-1	AUR-AFR4-TTP1	A739_H06	AURORA		TRUE	TRUE	FALSE	FF	Paired	Primary	Post-treatment	Breast	Breast	Breast	HR-/HER2-	HR-/HER2-	Primary	Negative	Negative	Negative	Negative	Negative	Negative	Post-treatment	156	Primary	Primary	Primary	Primary	Primary	3.6544	NA	NA	NA	NA	NA	FALSE	NA	NA	NA	NA	NA	0.084946	-0.527011	0.365762	-0.50108
AFR4	AUR_06_03_03	AUR-AFR4-TTM1-A	AUR-AFR4-TTM1-A-1-1	AUR-AFR4-TTM1	A739_G06	AURORA		TRUE	TRUE	TRUE	FF	Paired	Metastasis	Metastasis	Brain	Brain	Brain	Metastasis	Metastasis	HR Unknown/HER2 Unknown	NA	NA	NA	Negative	Negative	Negative	Metastasis	Metastasis	1	266	FALSE	FALSE	FALSE	5.3201	1	1	1	3	0.0604855	FALSE	FALSE	FALSE	FALSE	FALSE	FALSE	0.769604	-0.0778391	-0.566387	-0.18012
AE6X	AUR_03_549-2_01	AUR-AE6X-TTP1-A	AUR-AE6X-TTP1-A-1-0	AUR-AE6X-TTP1	A738_D02	AURORA		TRUE	TRUE	FALSE	FFPE	Paired	Primary	Post-treatment	Breast	Breast	Breast	HR-/HER2-	HR-/HER2-	Primary	Negative	Negative	Negative	Negative	Negative	Negative	Post-treatment	133	Primary	Primary	Primary	Primary	Primary	95.9105	NA	NA	NA	NA	NA	FALSE	NA	NA	NA	NA	NA	0.310252	-0.535366	0.0105162	-0.367395
AE6X	AUR_03_549-2_03	AUR-AE6X-TTM1-A	AUR-AE6X-TTM1-A-1-1	AUR-AE6X-TTM1	A738_C02	AURORA		TRUE	TRUE	TRUE	FF	Paired	Metastasis	Metastasis	Liver	Liver	Liver	Metastasis	Metastasis	HR-/HER2-	Negative	Negative	Negative	Negative	Negative	Negative	Metastasis	Metastasis	NA	589	TRUE	FALSE	FALSE	7.6321	1	1	0	2	0.0804648	FALSE	FALSE	FALSE	FALSE	FALSE	FALSE	0.781513	-0.0915726	-0.552557	-0.319856
AFKD	AUR_500_06_01	AUR-AFKD-TTP1-A	AUR-AFKD-TTP1-A-1-1	AUR-AFKD-TTP1	A739_D05	AURORA		TRUE	TRUE	TRUE	FFPE	Paired	Primary	Post-treatment	Breast	Breast	Breast	HR+/HER2+	HR+/HER2 Unknown (IHC was 2+ but no fish, site recorded unknown)	Primary	Positive	NA	Positive	Positive	Negative	Positive	Unknown	1409	NA	NA	NA	NA	NA	5.0715	NA	NA	NA	NA	0.0840764	FALSE	FALSE	FALSE	FALSE	FALSE	FALSE	0.411957	0.186363	-0.591645	0.15611
AFKD	AUR_500_06_02	AUR-AFKD-TTM1-A	AUR-AFKD-TTM1-A-1-1	AUR-AFKD-TTM1	A739_C05	AURORA		TRUE	FALSE	TRUE	FF	Paired	Metastasis	Metastasis	Liver	Liver	Liver	Metastasis	Metastasis	Not Done	NA	NA	NA	NA	NA	NA	Metastasis	Metastasis	NA	1409	FALSE	FALSE	FALSE	8.7259	NA	NA	NA	NA	0.26006	FALSE	FALSE	FALSE	FALSE	FALSE	FALSE	NA	NA	NA	NA
AER4	AUR_01_09_01	AUR-AER4-TTP1-A	AUR-AER4-TTP1-A-1-0	AUR-AER4-TTP1	A738_B04	AURORA		TRUE	TRUE	FALSE	FFPE	Paired	Primary	Post-treatment	Breast	Breast	Breast	HR+/HER2-	HR+/HER2-	Primary	Positive	Negative	Positive	Positive	Negative	Positive	Post-treatment	142	Primary	Primary	Primary	Primary	Primary	124.276	NA	NA	NA	NA	NA	FALSE	NA	NA	NA	NA	NA	-0.359136	-0.516543	0.76461	-0.35952
AER4	AUR_01_09_04	AUR-AER4-TTM2-A	AUR-AER4-TTM2-A-1-1	AUR-AER4-TTM2	A738_A04	AURORA		TRUE	FALSE	TRUE	FF	Paired	Metastasis	Metastasis	Left liver	Liver	Liver	Metastasis	Metastasis	Not Done	NA	NA	NA	NA	NA	NA	Metastasis	Metastasis	7	2067	FALSE	TRUE	FALSE	5.8421	NA	NA	NA	NA	0.0365477	FALSE	FALSE	FALSE	FALSE	FALSE	FALSE	NA	NA	NA	NA
AER4	AUR_01_09_03	AUR-AER4-TTM1-A	AUR-AER4-TTM1-A-1-1	AUR-AER4-TTM1	A738_H03	AURORA		TRUE	FALSE	TRUE	FF	Paired	Metastasis	Metastasis	Right liver	Liver	Liver	Metastasis	Metastasis	Not Done	NA	NA	NA	NA	NA	NA	Metastasis	Metastasis	7	2067	FALSE	TRUE	FALSE	5.0466	NA	NA	NA	NA	0.0454239	FALSE	FALSE	FALSE	FALSE	FALSE	FALSE	NA	NA	NA	NA
AFUO	AUR_5_412-9	AUR-AFUO-TTP1-B	AUR-AFUO-TTP1-B-1-0	AUR-AFUO-TTP1	NA	AURORA	Second aliquote	FALSE	FALSE	TRUE	FFPE	Paired	Primary	Pre-treatment	Breast	Breast	Breast	HR+/HER2 Unknown	HR+/HER2 Unknown	Primary	NA	NA	NA	NA	NA	NA	Pre-treatment	-3	Primary	Primary	Primary	Primary	Primary	NA	1	0	0	1	NA	NA	NA	NA	NA	NA	NA	NA	NA	NA	NA
AFUO	AUR_5_412-9_01	AUR-AFUO-TTP1-A	AUR-AFUO-TTP1-A-1-0	AUR-AFUO-TTP1	A739_B11	AURORA		FALSE	TRUE	FALSE	FFPE	Paired	Primary	Pre-treatment	Breast	Breast	Breast	HR+/HER2 Unknown	HR+/HER2 Unknown	Primary	Positive	NA	Positive	Positive	Negative	Positive	Pre-treatment	-3	Primary	Primary	Primary	Primary	Primary	NA	1	0	0	1	NA	NA	NA	NA	NA	NA	NA	-0.237839	-0.239568	0.194622	0.221128
AFR2	AUR_06_01_01	AUR-AFR2-TTP1-A	AUR-AFR2-TTP1-A-1-1	AUR-AFR2-TTP1	A739_B06	AURORA		TRUE	TRUE	TRUE	FF	Paired	Primary	Pre-treatment	Breast	Breast	Breast	HR+/HER2-	HR+/HER2-	Primary	Positive	Negative	Positive	Positive	Negative	Positive	Pre-treatment	29	Primary	Primary	Primary	Primary	Primary	23.9155	6	1	0	7	0.4029	FALSE	FALSE	FALSE	FALSE	FALSE	FALSE	-0.444706	-0.0730372	0.42886	0.198559
AFR2	AUR_06_01_03	AUR-AFR2-TTM1-A	AUR-AFR2-TTM1-A-1-1	AUR-AFR2-TTM1	A739_A06	AURORA		TRUE	FALSE	TRUE	FF	Paired	Metastasis	Metastasis	Brain	Brain	Brain	Metastasis	Metastasis	HR+/HER2-	NA	NA	NA	NA	NA	NA	Metastasis	Metastasis	2	1404	TRUE	TRUE	FALSE	26.9484	NA	NA	NA	NA	0.205916	FALSE	TRUE	FALSE	FALSE	FALSE	FALSE	NA	NA	NA	NA
AERY	AUR_03_549-7_01	AUR-AERY-TTP1-A	AUR-AERY-TTP1-A-1-0	AUR-AERY-TTP1	A738_E08	AURORA		TRUE	FALSE	FALSE	FFPE	Paired	Primary	Pre-treatment	Breast	Breast	Breast	HR-/HER2+	HR-/HER2+	Primary	NA	NA	NA	NA	NA	NA	Pre-treatment	0	Primary	Primary	Primary	Primary	Primary	247.582	NA	NA	NA	NA	NA	FALSE	NA	NA	NA	NA	NA	NA	NA	NA	NA
AERY	AUR_03_549-7_03	AUR-AERY-TTM1-A	AUR-AERY-TTM1-A-1-1	AUR-AERY-TTM1	A738_D08	AURORA		TRUE	TRUE	TRUE	FF	Paired	Metastasis	Metastasis	Liver	Liver	Liver	Metastasis	Metastasis	HR-/HER2+	Negative	Positive	Negative	Negative	Positive	Negative	Metastasis	Metastasis	NA	15	FALSE	FALSE	FALSE	5.2206	2	2	0	4	0.263435	FALSE	FALSE	FALSE	FALSE	FALSE	FALSE	0.205282	0.609316	-0.466315	0.148331
ADCB	AUR_03_409-2-02	AUR-ADCB-TTP1-A	AUR-ADCB-TTP1-A-13-0	AUR-ADCB-TTP1	A738_C01	AURORA		TRUE	FALSE	TRUE	FFPE	Paired	Primary	Pre-treatment	Breast	Breast	Breast	HR+/HER2-	HR+/HER2-	Primary	NA	NA	NA	NA	NA	NA	Pre-treatment	8729	Primary	Primary	Primary	Primary	Primary	172.306	NA	NA	NA	NA	0.157145	FALSE	FALSE	FALSE	FALSE	FALSE	FALSE	NA	NA	NA	NA
ADCB	AUR_03_409-2-01	AUR-ADCB-TTM1-A	AUR-ADCB-TTM1-A-1-1	AUR-ADCB-TTM1	A738_B01	AURORA		TRUE	TRUE	TRUE	FF	Paired	Metastasis	Metastasis	Lung	Lung	Lung	Metastasis	Metastasis	HR-/HER2+	Negative	Positive	Negative	Negative	Positive	Negative	Metastasis	Metastasis	NA	6440	TRUE	TRUE	FALSE	12.2561	6	4	6	16	0.0424791	FALSE	FALSE	FALSE	FALSE	FALSE	FALSE	-0.139112	0.73407	-0.214406	0.379208
AFUP	AUR_5_412-10_01	AUR-AFUP-TTP1-A	AUR-AFUP-TTP1-A-1-0	AUR-AFUP-TTP1	A739_E11	AURORA		TRUE	FALSE	TRUE	FFPE	Paired	Primary	Post-treatment	Breast	Breast	Breast	HR Unknown/HER2-	HR Unknown/HER2-	Primary	NA	NA	NA	NA	NA	NA	Post-treatment	88	Primary	Primary	Primary	Primary	Primary	78.931	NA	NA	NA	NA	0.115243	FALSE	FALSE	FALSE	FALSE	FALSE	FALSE	NA	NA	NA	NA
AFUP	AUR_5_412-10_03	AUR-AFUP-TTM1-A	AUR-AFUP-TTM1-A-1-1	AUR-AFUP-TTM1	A739_D11	AURORA		TRUE	TRUE	TRUE	FF	Paired	Metastasis	Metastasis	Ovary	Ovary	Others	Metastasis	Metastasis	Not Done	NA	NA	NA	Positive	Negative	Positive	Metastasis	Metastasis	8	1489	TRUE	TRUE	FALSE	9.4717	2	1	0	3	0.0362082	FALSE	FALSE	FALSE	FALSE	FALSE	FALSE	-0.59904	0.042497	0.496279	0.287299
AFUK	AUR_5_412-5_01	AUR-AFUK-TTP1-A	AUR-AFUK-TTP1-A-1-0	AUR-AFUK-TTP1	A739_F09	AURORA		FALSE	FALSE	TRUE	FFPE	Paired	Primary	Pre-treatment	Breast	Breast	Breast	HR+/HER2 Unknown	HR+/HER2 Unknown	Primary	NA	NA	NA	NA	NA	NA	Pre-treatment	3	Primary	Primary	Primary	Primary	Primary	NA	NA	NA	NA	NA	0.184516	FALSE	FALSE	FALSE	FALSE	FALSE	FALSE	NA	NA	NA	NA
AFUK	AUR_5_412-5_05	AUR-AFUK-TTM2-A	AUR-AFUK-TTM2-A-1-0	AUR-AFUK-TTM2	A739_E09	AURORA		TRUE	TRUE	TRUE	FF	Paired	Metastasis	Metastasis	Lymph node	Lymph node	Lymph node	Metastasis	Metastasis	Not Done	NA	NA	NA	Positive	Negative	Negative	Metastasis	Metastasis	NA	2141	FALSE	TRUE	FALSE	6.5382	1	1	0	2	0.0679118	FALSE	FALSE	FALSE	FALSE	FALSE	FALSE	-0.579352	-0.232461	0.715534	0.0792797
AFUK	AUR_5_412-5_03	AUR-AFUK-TTM1-A	AUR-AFUK-TTM1-A-1-0	AUR-AFUK-TTM1	A739_D09	AURORA		TRUE	TRUE	TRUE	FF	Paired	Metastasis	Metastasis	Chest wall	Chest	Others	Metastasis	Metastasis	HR+/HER2-	Positive	Negative	Positive	Positive	Negative	Positive	Metastasis	Metastasis	NA	2061	FALSE	TRUE	FALSE	6.7868	1	1	0	2	0.226586	FALSE	FALSE	FALSE	FALSE	FALSE	FALSE	-0.573974	0.169364	0.20096	0.675102
AF99	AUR_13_676-6_01	AUR-AF99-TTP1-A	AUR-AF99-TTP1-A-1-0	AUR-AF99-TTP1	A738_A10	AURORA		TRUE	FALSE	FALSE	FFPE	Paired	Primary	Post-treatment	Breast	Breast	Breast	HR+/HER2-	HR+/HER2-	Primary	NA	NA	NA	NA	NA	NA	Post-treatment	99	Primary	Primary	Primary	Primary	Primary	154.158	NA	NA	NA	NA	NA	FALSE	NA	NA	NA	NA	NA	NA	NA	NA	NA
AF99	AUR_13_676-6_03	AUR-AF99-TTM1-A	AUR-AF99-TTM1-A-1-1	AUR-AF99-TTM1	A738_H09	AURORA		TRUE	FALSE	TRUE	FF	Paired	Metastasis	Metastasis	Soft Tissue	Liver	Liver	Metastasis	Metastasis	Not Done	NA	NA	NA	NA	NA	NA	Metastasis	Metastasis	2	440	FALSE	FALSE	FALSE	7.7564	NA	NA	NA	NA	0.263185	FALSE	TRUE	FALSE	FALSE	FALSE	FALSE	NA	NA	NA	NA
AER5	AUR_01_10_01	AUR-AER5-TTP3-A	AUR-AER5-TTP3-A-1-0	AUR-AER5-TTP3	A738_H04	AURORA		TRUE	FALSE	TRUE	FFPE	Paired	Primary	Post-treatment	Breast	Breast	Breast	HR-/HER2-	HR-/HER2-	Primary	NA	NA	NA	NA	NA	NA	Post-treatment	1042	Primary	Primary	Primary	Primary	Primary	111.15	NA	NA	NA	NA	0.289349	FALSE	FALSE	FALSE	FALSE	FALSE	FALSE	NA	NA	NA	NA
AER5	AUR_01_10_01	AUR-AER5-TTP3-A	AUR-AER5-TTP3-A-2-0	AUR-AER5-TTP3	NA	AURORA	Second aliquote	FALSE	FALSE	DUPLICATE	FFPE	Paired	Primary	Post-treatment	Breast	Breast	Breast	HR-/HER2-	HR-/HER2-	Primary	NA	NA	NA	NA	NA	NA	Post-treatment	1042	Primary	Primary	Primary	Primary	Primary	NA	NA	NA	NA	NA	NA	FALSE	NA	NA	NA	NA	NA	NA	NA	NA	NA
AER5	AUR_01_10_03	AUR-AER5-TTP2-A	AUR-AER5-TTP2-A-1-1	AUR-AER5-TTP2	A738_G04	AURORA		TRUE	FALSE	TRUE	FF	Paired	Primary	Post-treatment	Breast	Breast	Breast	HR-/HER2-	HR-/HER2-	Primary	NA	NA	NA	NA	NA	NA	Post-treatment	1591	Primary	Primary	Primary	Primary	Primary	10.7644	NA	NA	NA	NA	0.0362811	FALSE	FALSE	FALSE	FALSE	FALSE	FALSE	NA	NA	NA	NA
AER5	AUR_01_10_04	AUR-AER5-TTP2-B	AUR-AER5-TTP2-B-2-1	AUR-AER5-TTP2	NA	AURORA	Second aliquote	DUPLICATE	FALSE	DUPLICATE	FF	Paired	Primary	Post-treatment	Breast	Breast	Breast	HR-/HER2-	HR-/HER2-	Primary	NA	NA	NA	NA	NA	NA	Post-treatment	1591	Primary	Primary	Primary	Primary	Primary	NA	NA	NA	NA	NA	0.0454628	FALSE	FALSE	FALSE	FALSE	FALSE	FALSE	NA	NA	NA	NA
AER5	AUR_01_10_09	AUR-AER5-TTM5-A	AUR-AER5-TTM5-A-1-1	AUR-AER5-TTM5	A738_F04	AURORA		TRUE	FALSE	TRUE	FF	Paired	Metastasis	Metastasis	Left lung	Lung	Lung	Metastasis	Metastasis	Not Done	NA	NA	NA	NA	NA	NA	Metastasis	Metastasis	3	1621	TRUE	FALSE	FALSE	6.3891	NA	NA	NA	NA	0.0772332	TRUE	FALSE	FALSE	FALSE	FALSE	FALSE	NA	NA	NA	NA
AER5	AUR_01_10_08	AUR-AER5-TTM4-A	AUR-AER5-TTM4-A-1-1	AUR-AER5-TTM4	A738_E04	AURORA		TRUE	FALSE	TRUE	FF	Paired	Metastasis	Metastasis	Liver	Liver	Liver	Metastasis	Metastasis	Not Done	NA	NA	NA	NA	NA	NA	Metastasis	Metastasis	3	1621	TRUE	FALSE	FALSE	6.5134	NA	NA	NA	NA	0.148835	TRUE	FALSE	FALSE	FALSE	FALSE	FALSE	NA	NA	NA	NA
AD9J	AUR_01_06_06	AUR-AD9J-TTP1-B	AUR-AD9J-TTP1-B-4-0	AUR-AD9J-TTP1	NA	AURORA		FALSE	TRUE	FALSE	FFPE	Unpaired	Primary	Pre-treatment	Breast	Breast	Breast	HR+/HER2-	HR+/HER2-	Primary	Positive	Negative	Positive	Positive	Negative	Positive	Pre-treatment	27	Primary	Primary	Primary	Primary	Primary	NA	NA	NA	NA	NA	NA	NA	NA	NA	NA	NA	NA	-0.433085	-0.427323	0.723409	-0.110684
AD9I	AUR_01_05_07	AUR-AD9I-TTP1-A	NA	AUR-AD9I-TTP1	NA	AURORA		FALSE	FALSE	FALSE	FFPE	Unpaired	Primary	Pre-treatment	Breast	Breast	Breast	HR+/HER2-	HR+/HER2+	Primary	NA	NA	NA	NA	NA	NA	Pre-treatment	3239	Primary	Primary	Primary	Primary	Primary	NA	NA	NA	NA	NA	NA	NA	NA	NA	NA	NA	NA	NA	NA	NA	NA
AD9I	AUR_01_05_03	AUR-AD9I-TTM3-A	AUR-AD9I-TTM3-A-1-1	AUR-AD9I-TTM3	NA	AURORA		TRUE	TRUE	TRUE	FF	Unpaired	Metastasis	Metastasis	Left liver	Liver	Liver	Metastasis	Metastasis	Not Done	NA	NA	NA	Positive	Negative	Positive	Metastasis	Metastasis	3	8469	FALSE	TRUE	FALSE	5.7676	NA	NA	NA	NA	0.0527715	NA	FALSE	FALSE	FALSE	FALSE	FALSE	-0.706891	0.134598	0.489268	0.298631
AFUG	AUR_5_412-1_01	AUR-AFUG-TTP1-A	NA	AUR-AFUG-TTP1	NA	AURORA		FALSE	FALSE	FALSE	FFPE	Unpaired	Primary	Pre-treatment	Breast	Breast	Breast	HR+/HER2 Unknown	HR+/HER2 Unknown	Primary	NA	NA	NA	NA	NA	NA	Pre-treatment	-9	Primary	Primary	Primary	Primary	Primary	NA	NA	NA	NA	NA	NA	NA	NA	NA	NA	NA	NA	NA	NA	NA	NA
AFUG	AUR_5_412-1_03	AUR-AFUG-TTM1-A	AUR-AFUG-TTM1-A-1-1	AUR-AFUG-TTM1	A739_F08	AURORA		TRUE	TRUE	TRUE	FF	Unpaired	Metastasis	Metastasis	Chest wall	Chest	Others	Metastasis	Metastasis	HR+/HER2 Unknown	Positive	NA	Positive	Positive	Positive	Positive	Metastasis	Metastasis	NA	2337	FALSE	TRUE	FALSE	9.3226	0	1	3	4	0.277124	FALSE	TRUE	FALSE	FALSE	FALSE	FALSE	0.0962785	0.570324	-0.423866	0.259256
AD9E	AUR_01_01_07	AUR-AD9E-TTP1-A	NA	AUR-AD9E-TTP1	NA	AURORA		FALSE	FALSE	FALSE	FFPE	Unpaired	Primary	Pre-treatment	Breast	Breast	Breast	HR+/HER2+	HR+/HER2+	Primary	NA	NA	NA	NA	NA	NA	Pre-treatment	65	Primary	Primary	Primary	Primary	Primary	NA	NA	NA	NA	NA	NA	NA	NA	NA	NA	NA	NA	NA	NA	NA	NA
AD9E	AUR_01_01_05	AUR-AD9E-TTM4-A	AUR-AD9E-TTM4-A-1-1	AUR-AD9E-TTM4	NA	AURORA		TRUE	TRUE	FALSE	FF	Unpaired	Metastasis	Metastasis	Liver	Liver	Liver	Metastasis	Metastasis	Not Done	NA	NA	NA	Positive	Negative	Negative	Metastasis	Metastasis	9	3980	TRUE	TRUE	FALSE	1.9888	NA	NA	NA	NA	NA	NA	NA	NA	NA	NA	NA	-0.606915	0.0132053	0.458247	0.333685
AD9E	AUR_01_01_03	AUR-AD9E-TTM2-A	AUR-AD9E-TTM2-A-1-1	AUR-AD9E-TTM2	NA	AURORA		TRUE	TRUE	TRUE	FF	Unpaired	Metastasis	Metastasis	Lung	Lung	Lung	Metastasis	Metastasis	Not Done	NA	NA	NA	Positive	Positive	Negative	Metastasis	Metastasis	9	3980	TRUE	TRUE	FALSE	2.3617	NA	NA	NA	NA	0.0350238	NA	FALSE	FALSE	FALSE	FALSE	FALSE	-0.409652	0.193469	0.207107	0.287011
AD9E	AUR_01_01_01	AUR-AD9E-TTM1-A	AUR-AD9E-TTM1-A-2-1	AUR-AD9E-TTM1	NA	AURORA	Second aliquote	FALSE	FALSE	TRUE	FF	Unpaired	Metastasis	Metastasis	Soft Tissue	Soft tissue	Others	Metastasis	Metastasis	Not Done	NA	NA	NA	NA	NA	NA	Metastasis	Metastasis	9	3980	TRUE	TRUE	FALSE	NA	NA	NA	NA	NA	0.00991103	NA	FALSE	FALSE	FALSE	FALSE	FALSE	NA	NA	NA	NA
AD9E	AUR_01_01_01	AUR-AD9E-TTM1-A	AUR-AD9E-TTM1-A-1-1	AUR-AD9E-TTM1	NA	AURORA		TRUE	TRUE	FALSE	FF	Unpaired	Metastasis	Metastasis	Soft Tissue	Soft tissue	Others	Metastasis	Metastasis	Not Done	NA	NA	NA	Positive	Negative	Negative	Metastasis	Metastasis	9	3980	TRUE	TRUE	FALSE	2.0137	NA	NA	NA	NA	NA	NA	NA	NA	NA	NA	NA	-0.34521	0.348571	-0.0608403	0.604706
AD9H	AUR_01_04_06	AUR-AD9H-TTP1-A	NA	AUR-AD9H-TTP1	NA	AURORA		FALSE	FALSE	FALSE	FFPE	Unpaired	Primary	Pre-treatment	Breast	Breast	Breast	HR+/HER2-	HR+/HER2-	Primary	NA	NA	NA	NA	NA	NA	Pre-treatment	0	Primary	Primary	Primary	Primary	Primary	NA	NA	NA	NA	NA	NA	NA	NA	NA	NA	NA	NA	NA	NA	NA	NA
AD9H	AUR_01_04_03	AUR-AD9H-TTM3-A	AUR-AD9H-TTM3-A-1-1	AUR-AD9H-TTM3	NA	AURORA		FALSE	TRUE	TRUE	FF	Unpaired	Metastasis	Metastasis	Left liver	Liver	Liver	Metastasis	Metastasis	Not Done	NA	NA	NA	Positive	Positive	Negative	Metastasis	Metastasis	8	5171	TRUE	TRUE	FALSE	NA	NA	NA	NA	NA	0.0256316	NA	FALSE	FALSE	FALSE	FALSE	FALSE	-0.379304	0.142281	0.235918	0.310828
AD9H	AUR_01_04_02	AUR-AD9H-TTM2-A	AUR-AD9H-TTM2-A-1-1	AUR-AD9H-TTM2	NA	AURORA		FALSE	TRUE	TRUE	FF	Unpaired	Metastasis	Metastasis	Right liver	Liver	Liver	Metastasis	Metastasis	Not Done	NA	NA	NA	Positive	Negative	Negative	Metastasis	Metastasis	8	5171	TRUE	TRUE	FALSE	NA	NA	NA	NA	NA	0.014753	NA	FALSE	FALSE	FALSE	FALSE	FALSE	-0.41599	0.0487395	0.233613	0.413205
AD9H	AUR_01_04_01	AUR-AD9H-TTM1-A	AUR-AD9H-TTM1-A-2-1	AUR-AD9H-TTM1	NA	AURORA		FALSE	TRUE	TRUE	FF	Unpaired	Metastasis	Metastasis	Pleura	Pleura	Others	Metastasis	Metastasis	HR+/HER2-	Positive	Negative	Positive	Positive	Negative	Positive	Metastasis	Metastasis	8	5171	TRUE	TRUE	FALSE	NA	NA	NA	NA	NA	0.0747295	NA	FALSE	FALSE	FALSE	FALSE	FALSE	-0.527203	-0.260504	0.621032	0.0581513
AD9F	AUR_01_02_06	AUR-AD9F-TTP1-A	NA	AUR-AD9F-TTP1	NA	AURORA		FALSE	FALSE	FALSE	FFPE	Unpaired	Primary	Post-treatment	Breast	Breast	Breast	HR+/HER2-	HR+/HER2-	Primary	NA	NA	NA	NA	NA	NA	Post-treatment	142	Primary	Primary	Primary	Primary	Primary	NA	NA	NA	NA	NA	NA	NA	NA	NA	NA	NA	NA	NA	NA	NA	NA
AD9F	AUR_01_02_04	AUR-AD9F-TTM3-A	AUR-AD9F-TTM3-A-1-1	AUR-AD9F-TTM3	NA	AURORA		FALSE	TRUE	TRUE	FF	Unpaired	Metastasis	Metastasis	Adrenal	Adrenal	Others	Metastasis	Metastasis	Not Done	NA	NA	NA	Positive	Negative	Positive	Metastasis	Metastasis	5	3916	FALSE	TRUE	FALSE	NA	NA	NA	NA	NA	0.0676046	NA	FALSE	FALSE	FALSE	FALSE	FALSE	-0.604802	0.156399	0.370084	0.42425
AD9F	AUR_01_02_03	AUR-AD9F-TTM2-A	AUR-AD9F-TTM2-A-2-1	AUR-AD9F-TTM2	NA	AURORA	Second aliquote	FALSE	FALSE	TRUE	FF	Unpaired	Metastasis	Metastasis	Distant/Metastasisastatic lymph node	Lymph node	Lymph node	Metastasis	Metastasis	Not Done	NA	NA	NA	NA	NA	NA	Metastasis	Metastasis	5	3916	FALSE	TRUE	FALSE	NA	NA	NA	NA	NA	0.426856	NA	FALSE	FALSE	FALSE	TRUE	FALSE	NA	NA	NA	NA
AD9F	AUR_01_02_03	AUR-AD9F-TTM2-A	AUR-AD9F-TTM2-A-1-1	AUR-AD9F-TTM2	NA	AURORA		FALSE	TRUE	FALSE	FF	Unpaired	Metastasis	Metastasis	Distant/Metastasisastatic lymph node	Lymph node	Lymph node	Metastasis	Metastasis	Not Done	NA	NA	NA	Positive	Negative	Negative	Metastasis	Metastasis	5	3916	FALSE	TRUE	FALSE	NA	NA	NA	NA	NA	NA	NA	NA	NA	NA	NA	NA	-0.541321	0.111357	0.35904	0.331765
AD9F	AUR_01_02_01	AUR-AD9F-TTM1-A	AUR-AD9F-TTM1-A-1-1	AUR-AD9F-TTM1	NA	AURORA		FALSE	TRUE	TRUE	FF	Unpaired	Metastasis	Metastasis	Liver	Liver	Liver	Metastasis	Metastasis	HR+/HER2-	Positive	Negative	Positive	Positive	Negative	Positive	Metastasis	Metastasis	5	3916	FALSE	TRUE	FALSE	NA	NA	NA	NA	NA	0.0431021	NA	FALSE	FALSE	FALSE	FALSE	FALSE	-0.57455	0.217095	0.31419	0.374406
[truncated: 19 more columns]

## Sheet: Normal tissues study
Name	Patient	Study	Tissue type	Tissue	Anatomic Site
AUR-AFE5-NT1-A-1-1	AFE5	AURORA	FF	Normal tissue	Brain
AUR-AFE9-NT1-A-1-1	AFE9	AURORA	FF	Normal tissue	Brain
AUR-AFE6-NT1-A-1-1	AFE6	AURORA	FF	Normal tissue	Lung
AUR-AFE4-NT1-A-1-1	AFE4	AURORA	FF	Normal tissue	Liver
AUR-AE5G-NT1-A-1-1	AE5G	AURORA	FF	Normal tissue	Breast
AUR-AFEC-NT1-A-1-1	AFEC	AURORA	FF	Normal tissue	Breast
A19-BrainN-120718-2R0i	A19	RAP	FF	Normal tissue	Brain
A20-BrainN-120774-2R0i	A20	RAP	FF	Normal tissue	Brain
A21-BrainN-Occi-120926-2R0i	A21	RAP	FF	Normal tissue	Brain
A23-BrainN-121320-2R0i	A23	RAP	FF	Normal tissue	Brain
A27-BrainN-131226-2R0i	A27	RAP	FF	Normal tissue	Brain
A30-BrainN-R-140019-2R0i	A30	RAP	FF	Normal tissue	Brain
A30-BrainN-Occi-140024-2R0i	A30	RAP	FF	Normal tissue	Brain
A34-BrainN-140837-1R0i	A34	RAP	FF	Normal tissue	Brain
A21-LungN-L-120922-2R0i	A21	RAP	FF	Normal tissue	Lung
A25-LungN-130388-1R0i	A25	RAP	FF	Normal tissue	Lung
A26-LungN-130920-2R0i	A26	RAP	FF	Normal tissue	Lung
A27-LungN-131214-2R0i	A27	RAP	FF	Normal tissue	Lung
A28-LungN-131331-2R0i	A28	RAP	FF	Normal tissue	Lung
A32-LungN-R-140512-2R0i	A32	RAP	FF	Normal tissue	Lung
A16-2-LivN-110855-2R0i	A16	RAP	FF	Normal tissue	Liver
A17-2-LivN-111079-2R0i	A17	RAP	FF	Normal tissue	Liver
A19-LivN-120715-2R0i	A19	RAP	FF	Normal tissue	Liver
A20-LivN-120769-2R0i	A20	RAP	FF	Normal tissue	Liver
A21-LivN-120915-2R0i	A21	RAP	FF	Normal tissue	Liver
A25-LivN-130387-1R0i	A25	RAP	FF	Normal tissue	Liver
A38-LivN-R-150306-1R0i	A38	RAP	FF	Normal tissue	Liver
A4-Breast-NL-R0i	A4	RAP	FF	Normal tissue	Breast
9830-010214A-R0i	9830.01	9830	FF	Normal tissue	Breast
9830-020185A-R0i	9830.02	9830	FF	Normal tissue	Breast

## Sheet: RAP study
Sample name	Study	Institution	Short name	Pairs	PvsM	Tissue type	Anatomic Site	Anatomic Site Groups	Corr_Basal	Corr_Her2	Corr_LumA	Corr_LumB	Corr_Normal	ROR_S	ROR-P (Subtype + Proliferation)	Proliferation Score	PAM50 Call	Groups PAM50 Gene expression analysis	Pairs-PAM50-Prim (Primary-metastatic pairs based on primary PAM50 subtype)	ER	HER2	PR	ER RNAseq inferred for PAM50 subtype classification	HER2 RNAseq inferred for PAM50 subtype classification	PR RNAseq inferred for PAM50 subtype classification
A1.PrimT.ROi	RAP	UNC	A1_PRIM	Paired	PRIM	FF	Breast	Breast	0.570516	-0.129796	-0.331381	-0.380072	0.196255	49.4802	47.9414	0.16024	Basal	Basal	Paired_Basal	NEG	NEG	NEG	NEG	NEG	NEG
A1.1.R.LUNG.MET.ROi	RAP	UNC	A1_MET-1	Paired	MET	FF	Lung	Lung	0.597503	-0.214982	-0.316495	-0.541993	0.380648	45.0398	44.864	0.128251	Basal	Basal	Paired_Basal	NEG	NEG	NEG	NEG	NEG	NEG
A1.10.ADREN.MET.ROi	RAP	UNC	A1_MET-2	Paired	MET	FF	Adrenal	Rest	0.624682	-0.166291	-0.466699	-0.143145	-0.00244898	58.7844	65.3254	0.531787	Basal	Basal	Paired_Basal	NEG	NEG	NEG	NEG	NEG	NEG
A1.13.LIVER.MET.ROi	RAP	UNC	A1_MET-3	Paired	MET	FF	Liver	Liver	0.62449	-0.129412	-0.492245	-0.17042	0.0228091	59.9272	63.6528	0.479042	Basal	Basal	Paired_Basal	NEG	NEG	NEG	NEG	NEG	NEG
A1.4.SPIN.MET.ROi	RAP	UNC	A1_MET-4	Paired	MET	FF	Spine	Rest	0.668283	-0.124706	-0.547083	-0.199904	0.0409604	61.9934	66.7039	0.543698	Basal	Basal	Paired_Basal	NEG	NEG	NEG	NEG	NEG	NEG
A1.AxLN.Met.R0i	RAP	UNC	A1_MET-5	Paired	MET	FF	Lymph node	Lymph node	0.695558	-0.100504	-0.523553	-0.210276	0.044898	61.3346	62.5749	0.44327	Basal	Basal	Paired_Basal	NEG	NEG	NEG	NEG	NEG	NEG
A1.AxLN.Met.ROi	RAP	UNC	A1_MET-6	Paired	MET	FF	Lymph node	Lymph node	0.641792	-0.075392	-0.448318	-0.34421	0.169224	56.0783	57.6463	0.3549	Basal	Basal	Paired_Basal	NEG	NEG	NEG	NEG	NEG	NEG
A2.PrimT.FFPER0i	RAP	UNC	A2_PRIM	Paired	PRIM	FFPE	Breast	Breast	-0.153517	-0.237551	0.23054	0.0047539	0.0371188	27.4547	19.6145	-0.429152	LumA	Lums-HER2E	Paired_Lums-HER2E	POS	NEG	NA	POS	NEG	POS
A2.LN.Met.subcarinall.R0i	RAP	UNC	A2_MET-1	Paired	MET	FF	Brain	Brain	-0.160048	0.291236	-0.184346	0.418487	-0.442401	59.2948	57.7082	0.242286	LumB	Lums-HER2E	Paired_Lums-HER2E	POS	NEG	NA	POS	NEG	NEG
A2.LungMet.R0i	RAP	UNC	A2_MET-2	Paired	MET	FF	Lung	Lung	-0.0103241	0.42886	-0.325906	0.512413	-0.522401	69.4937	65.69	0.361491	LumB	Lums-HER2E	Paired_Lums-HER2E	POS	NEG	NA	POS	NEG	POS
A4.PrimT020306B.ROi	RAP	UNC	A4_PRIM	Paired	PRIM	FF	Breast	Breast	-0.197119	-0.358655	0.447971	-0.0462425	0.232173	15.5964	9.8029	-0.582322	LumA	Lums-HER2E	Paired_Lums-HER2E	POS	NEG	POS	POS	NEG	POS
A4.LUL.LungMet.R0i	RAP	UNC	A4_MET-1	Paired	MET	FF	Lung	Lung	-0.237839	0.222665	0.254262	0.0670828	0.00456183	33.8459	26.364	-0.35644	LumA	Lums-HER2E	Paired_Lums-HER2E	POS	NEG	NA	POS	NEG	POS
A4.LULungMet.R0i	RAP	UNC	A4_MET-2	Paired	MET	FF	Lung	Lung	-0.178679	0.219784	0.258776	0.00340936	0.0287635	32.8448	21.7453	-0.461113	LumA	Lums-HER2E	Paired_Lums-HER2E	POS	NEG	POS	POS	NEG	POS
A4.LULungMet.ROi	RAP	UNC	A4_MET-3	Paired	MET	FF	Lung	Lung	-0.196255	0.213349	0.226507	-0.100216	0.0818727	32.2683	21.6529	-0.456129	LumA	Lums-HER2E	Paired_Lums-HER2E	POS	NEG	POS	POS	NEG	POS
A5.PrimT030065B.ROi	RAP	UNC	A5_PRIM	Paired	PRIM	FF	Breast	Breast	0.603553	-0.0726531	-0.467467	-0.160336	0.0659304	59.7975	49.8711	0.126813	Basal	Basal	Paired_Basal	NEG	NEG	NEG	NEG	NEG	NEG
A5.CHESTwal.MET.ROi	RAP	UNC	A5_MET-1	Paired	MET	FF	Chest	Rest	-0.0841777	-0.166675	0.0472989	0.0463385	0.0122449	37.129	38.9432	-0.0156829	LumA	Lums-HER2E	Paired_Basal	NEG	NEG	NEG	NEG	NEG	NEG
A5.SkinMet.R.R0i	RAP	UNC	A5_MET-2	Paired	MET	FF	Skin	Rest	0.634301	-0.0987299	-0.538596	-0.121299	-0.0227136	63.1686	61.2456	0.392159	Basal	Basal	Paired_Basal	NEG	NEG	NEG	NEG	NEG	NEG
A5.SkinMet.R.ROi	RAP	UNC	A5_MET-3	Paired	MET	FF	Skin	Rest	0.588764	-0.117311	-0.422713	-0.235534	0.130276	55.9566	53.0546	0.239387	Basal	Basal	Paired_Basal	NEG	NEG	NEG	NEG	NEG	NEG
A7.PrimT020552B.ROi	RAP	UNC	A7_PRIM	Paired	PRIM	FF	Breast	Breast	0.739928	-0.0433613	-0.604802	-0.187227	0.00494598	66.146	61.2086	0.371199	Basal	Basal	Paired_Basal	NEG	NEG	NEG	NEG	NEG	NEG
A7.1LiverMet.ROi	RAP	UNC	A7_MET-1	Paired	MET	FF	Liver	Liver	0.796206	0.0781273	-0.716495	-0.0756303	-0.14593	74.7027	76.0553	0.671644	Basal	Basal	Paired_Basal	NEG	NEG	NEG	NEG	NEG	NEG
A7.BRAIN.MET.ROi	RAP	UNC	A7_MET-2	Paired	MET	FF	Brain	Brain	0.777383	0.110876	-0.735894	-0.00965186	-0.199904	76.9973	78.9369	0.722179	Basal	Basal	Paired_Basal	NEG	NEG	NEG	NEG	NEG	NEG
A7.KIDNEY.MET.ROi	RAP	UNC	A7_MET-3	Paired	MET	FF	Kidney	Rest	0.726194	0.0156062	-0.524226	-0.295654	0.102329	61.7896	56.1161	0.269686	Basal	Basal	Paired_Basal	NEG	NEG	NEG	NEG	NEG	NEG
A7.LUNG.MET.ROi	RAP	UNC	A7_MET-4	Paired	MET	FF	Lung	Lung	0.687779	0.000528211	-0.493301	-0.296327	0.0979112	60.085	57.2621	0.310231	Basal	Basal	Paired_Basal	NEG	NEG	NEG	NEG	NEG	NEG
A7.RIB.MET.ROi	RAP	UNC	A7_MET-5	Paired	MET	FF	Rib	Rest	0.787947	0.0392317	-0.660024	-0.205666	-0.030108	69.576	64.4461	0.422899	Basal	Basal	Paired_Basal	NEG	NEG	NEG	NEG	NEG	NEG
A8.PrimT.030222B.R0i	RAP	UNC	A8_PRIM	Paired	PRIM	FF	Breast	Breast	0.055078	0.567827	-0.36461	0.288547	-0.448739	69.7169	59.9768	0.21155	Her2	Lums-HER2E	Paired_Lums-HER2E	POS	POS	POS	POS	POS	POS
A8.OvaryMet.R0i	RAP	UNC	A8_MET-1	Paired	MET	FF	Ovary	Rest	0.0345258	0.416567	-0.207299	-0.0247299	-0.0815846	55.637	47.1023	0.00903668	Her2	Lums-HER2E	Paired_Lums-HER2E	POS	POS	POS	POS	POS	POS
A11.PrimT.FFPER0i	RAP	UNC	A11_PRIM	Paired	PRIM	FFPE	Breast	Breast	0.433854	-0.0418247	-0.380936	-0.0481633	-0.0884034	57.6978	55.2228	0.262393	Basal	Basal	Paired_Basal	NEG	NEG	NEG	NEG	NEG	NEG
A11.BRAIN.MET.ROi	RAP	UNC	A11_MET-1	Paired	MET	FF	Brain	Brain	0.406675	0.0417287	-0.434238	-0.144682	-0.0703481	59.3842	63.3248	0.447759	Basal	Basal	Paired_Basal	NEG	NEG	NEG	NEG	NEG	NEG
A11.CELEBE.MET.ROi	RAP	UNC	A11_MET-2	Paired	MET	FF	Brain	Brain	0.609604	0.0547899	-0.598944	-0.0210804	-0.159184	69.4754	68.7557	0.517702	Basal	Basal	Paired_Basal	NEG	NEG	NEG	NEG	NEG	NEG
A11.LIVER.MET.ROi	RAP	UNC	A11_MET-3	Paired	MET	FF	Liver	Liver	0.572725	0.0710204	-0.623625	-0.025114	-0.199424	70.4865	73.74	0.633087	Basal	Basal	Paired_Basal	NEG	NEG	NEG	NEG	NEG	NEG
A11.LUNG.MET.ROi	RAP	UNC	A11_MET-4	Paired	MET	FF	Lung	Lung	0.470156	0.170804	-0.599232	0.115102	-0.323121	72.7754	74.1551	0.609236	Basal	Basal	Paired_Basal	NEG	NEG	NEG	NEG	NEG	NEG
A11.RIB.MET.ROi	RAP	UNC	A11_MET-5	Paired	MET	FF	Rib	Rest	0.608163	0.120192	-0.64994	-0.0666987	-0.151693	71.7787	68.269	0.484416	Basal	Basal	Paired_Basal	NEG	NEG	NEG	NEG	NEG	NEG
A11.THYRO.MET.ROi	RAP	UNC	A11_MET-6	Paired	MET	FF	Thyroid	Rest	-0.378247	-0.19587	0.51587	-0.1709	0.33964	12.1877	9.22684	-0.593317	LumA	Lums-HER2E	Paired_Basal	NEG	NEG	NEG	NEG	NEG	NEG
A12.PriT020076B.ROi	RAP	UNC	A12_PRIM	Paired	PRIM	FF	Breast	Breast	-0.662137	0.156399	0.37623	0.354718	-0.277023	30.526	37.1704	-0.0803554	LumA	Lums-HER2E	Paired_Lums-HER2E	POS	NEG	POS	POS	NEG	POS
A12.ADREN.MET.ROi	RAP	UNC	A12_MET-1	Paired	MET	FF	Adrenal	Rest	-0.476399	-0.0347179	0.274238	0.451717	-0.186747	34.4928	36.8666	-0.0911964	LumB	Lums-HER2E	Paired_Lums-HER2E	POS	NEG	POS	POS	NEG	POS
A12.LIVER.MET.ROi	RAP	UNC	A12_MET-2	Paired	MET	FF	Liver	Liver	-0.436927	0.229676	-0.0259784	0.501753	-0.438848	51.8479	62.2723	0.401095	LumB	Lums-HER2E	Paired_Lums-HER2E	POS	NEG	POS	POS	NEG	POS
A12.LN.MET.ROi	RAP	UNC	A12_MET-3	Paired	MET	FF	Lymph node	Lymph node	-0.157839	0.263962	-0.244754	0.431549	-0.421465	61.6283	68.0143	0.48777	LumB	Lums-HER2E	Paired_Lums-HER2E	POS	NEG	POS	POS	NEG	POS
A12.LUNG.MET.ROi	RAP	UNC	A12_MET-4	Paired	MET	FF	Lung	Lung	-0.231116	-0.0328932	0.0781273	0.340312	-0.178295	42.0011	50.4463	0.211206	LumB	Lums-HER2E	Paired_Lums-HER2E	POS	NEG	POS	POS	NEG	POS
A12.MESENTE.MET.ROi	RAP	UNC	A12_MET-5	Paired	MET	FF	Mesentary	Rest	-0.326194	0.125474	0.00292917	0.510012	-0.374886	49.8078	55.2087	0.252265	LumB	Lums-HER2E	Paired_Lums-HER2E	POS	NEG	POS	POS	NEG	POS
A12.PLEURA.MET.ROi	RAP	UNC	A12_MET-6	Paired	MET	FF	Pleura	Rest	-0.413205	0.169076	0.0803361	0.453061	-0.326963	45.8553	49.0133	0.117604	LumB	Lums-HER2E	Paired_Lums-HER2E	POS	NEG	POS	POS	NEG	POS
A12.SKULL.MET.ROi	RAP	UNC	A12_MET-7	Paired	MET	FF	Skull	Rest	-0.150828	0.0529652	-0.201633	0.507323	-0.522977	58.0478	63.2404	0.412144	LumB	Lums-HER2E	Paired_Lums-HER2E	POS	NEG	POS	POS	NEG	POS
A15.PriT070427B.ROi	RAP	UNC	A15_PRIM	Paired	PRIM	FF	Breast	Breast	0.370756	0.0358703	-0.441921	-0.0579592	-0.13988	60.889	60.2692	0.357331	Basal	Basal	Paired_Basal	NEG	NEG	NEG	NEG	NEG	NEG
A15.LiverMet.ROi	RAP	UNC	A15_MET-1	Paired	MET	FF	Liver	Liver	0.364322	0.0365426	-0.317551	-0.168115	0.0668908	53.8695	46.0281	0.0506004	Basal	Basal	Paired_Basal	NEG	NEG	NEG	NEG	NEG	NEG
A15.ChestMet.ROi	RAP	UNC	A15_MET-2	Paired	MET	FF	Chest	Rest	0.300648	-0.175126	-0.165138	-0.278944	0.199328	42.2783	43.2073	0.0818829	Basal	Basal	Paired_Basal	NEG	NEG	NEG	NEG	NEG	NEG
A15.MEDIAST.MET.ROi	RAP	UNC	A15_MET-3	Paired	MET	FF	Chest	Rest	0.445186	-0.0177191	-0.402929	-0.196158	-0.0368307	56.5445	52.7605	0.211059	Basal	Basal	Paired_Basal	NEG	NEG	NEG	NEG	NEG	NEG
A15.LUNG.MET.ROi	RAP	UNC	A15_MET-4	Paired	MET	FF	Lung	Lung	0.309964	-0.20557	-0.142473	-0.235918	0.119232	41.6578	36.0911	-0.0904541	Basal	Basal	Paired_Basal	NEG	NEG	NEG	NEG	NEG	NEG
A17.PrimT.FFPER0i	RAP	UNC	A17_PRIM	Paired	PRIM	FFPE	Breast	Breast	0.10012	-0.104346	0.118463	-0.174166	0.1103	32.3189	21.3766	-0.416869	LumA	Lums-HER2E	Paired_Lums-HER2E	POS	NEG	POS	POS	NEG	POS
A17.9ChestMet.R0i	RAP	UNC	A17_MET-1	Paired	MET	FF	Chest	Rest	0.392269	0.216903	-0.488884	-0.108764	0.00638656	64.748	55.1135	0.185114	Basal	Lums-HER2E	Paired_Lums-HER2E	NEG	NEG	NEG	NEG	NEG	NEG
A17.9ChestMet.ROi	RAP	UNC	A17_MET-2	Paired	MET	FF	Chest	Rest	0.390828	0.195966	-0.463145	-0.17599	0.072461	62.2428	52.3805	0.137801	Basal	Lums-HER2E	Paired_Lums-HER2E	NEG	NEG	NEG	NEG	NEG	NEG
A17.LivMet1.ROi	RAP	UNC	A17_MET-3	Paired	MET	FF	Liver	Liver	0.389196	0.169652	-0.459112	-0.163217	0.0197359	61.8951	59.3142	0.316556	Basal	Lums-HER2E	Paired_Lums-HER2E	NEG	NEG	NEG	NEG	NEG	NEG
A18.MuscleMet.R0i	RAP	UNC	A18_MET-1	Unpaired	MET	FF	Muscle	Rest	-0.276255	0.19539	0.0535414	0.512509	-0.341273	49.0244	50.7446	0.139872	LumB	Lums-HER2E	Unpaired	POS	NEG	POS	POS	NEG	POS
A19.04PrimT1.FFPER0i	RAP	UNC	A19_PRIM	Paired	PRIM	FFPE	Breast	Breast	-0.392173	-0.176855	0.626122	-0.344058	0.404178	4.93185	-2.69409	-0.840344	LumA	Lums-HER2E	Paired_Lums-HER2E	NEG	NEG	NEG	NEG	NEG	NEG
A19.04PrimT2.FFPER0i	RAP	UNC	A19_PRIM-2	Paired	PRIM	FFPE	Breast	Breast	-0.399856	-0.27491	0.720624	-0.371909	0.485138	-0.92753	-8.9072	-0.9457	LumA	Lums-HER2E	Paired_Lums-HER2E	NEG	NEG	NEG	NEG	NEG	NEG
A19.07.LN.Met.FFPER0i	RAP	UNC	A19_MET-1	Paired	MET	FFPE	Lymph node	Lymph node	-0.342713	0.449124	0.0122449	0.331573	-0.425978	51.103	42.8586	-0.0954479	Her2	Lums-HER2E	Paired_Lums-HER2E	NEG	NEG	NEG	NEG	NEG	NEG
A20.PrimT.FFPER0i	RAP	UNC	A20_PRIM	Paired	PRIM	FFPE	Breast	Breast	0.436639	-0.424826	-0.097527	-0.324562	0.254838	35.724	30.7915	-0.152783	Basal	Basal	Paired_Basal	NEG	NEG	NEG	NEG	NEG	NEG
A20.ADRENAL.MET.ROi	RAP	UNC	A20_MET-1	Paired	MET	FF	Adrenal	Rest	0.57551	-0.0742857	-0.582329	-0.0534454	-0.0838896	66.1835	67.615	0.52475	Basal	Basal	Paired_Basal	NEG	NEG	NEG	NEG	NEG	NEG
A20.BRAIN.MET.ROi	RAP	UNC	A20_MET-2	Paired	MET	FF	Brain	Brain	0.699592	-0.162929	-0.533541	-0.198559	0.0542137	61.049	61.0514	0.413277	Basal	Basal	Paired_Basal	NEG	NEG	NEG	NEG	NEG	NEG
A20.LIVER.MET.ROi	RAP	UNC	A20_MET-3	Paired	MET	FF	Liver	Liver	0.543721	0.0317407	-0.589148	-0.0707323	-0.047491	67.5747	66.7268	0.481279	Basal	Basal	Paired_Basal	NEG	NEG	NEG	NEG	NEG	NEG
A20.LN.Met.ROi	RAP	UNC	A20_MET-4	Paired	MET	FF	Lymph node	Lymph node	-0.0780312	-0.602593	0.414934	-0.246291	0.439232	10.6329	14.4403	-0.395784	Normal	Normal	Paired_Basal	NEG	NEG	NEG	NEG	NEG	NEG
A20.LUNG.MET.L.ROi	RAP	UNC	A20_MET-5	Paired	MET	FF	Lung	Lung	0.728595	-0.190972	-0.540168	-0.25503	0.118175	60.1118	57.302	0.331313	Basal	Basal	Paired_Basal	NEG	NEG	NEG	NEG	NEG	NEG
A20.LUNG.MET.R.ROi	RAP	UNC	A20_MET-6	Paired	MET	FF	Lung	Lung	0.704874	-0.15928	-0.595006	-0.166771	0.0229052	64.2082	58.8776	0.336049	Basal	Basal	Paired_Basal	NEG	NEG	NEG	NEG	NEG	NEG
A20.SPLEEN.MET.ROi	RAP	UNC	A20_MET-7	Paired	MET	FF	Spleen	Rest	0.23467	0.0330852	-0.325234	0.113469	-0.15102	58.2036	64.5862	0.473735	Basal	Basal	Paired_Basal	NEG	NEG	NEG	NEG	NEG	NEG
A21.PrimT.FFPE.R0i	RAP	UNC	A21_PRIM	Paired	PRIM	FFPE	Breast	Breast	-0.541993	-0.322833	0.674622	0.0668908	0.0860984	6.90991	5.7194	-0.645916	LumA	Lums-HER2E	Paired_Lums-HER2E	POS	NEG	POS	POS	NEG	POS
A21.AdrenalMet.R0i	RAP	UNC	A21_MET-1	Paired	MET	FF	Adrenal	Rest	-0.198944	-0.317071	0.365762	0.0557503	0.204802	21.3107	29.5098	-0.133968	LumA	Lums-HER2E	Paired_Lums-HER2E	POS	NEG	POS	POS	NEG	POS
A21.LN.met.FFPE.R0i	RAP	UNC	A21_MET-2	Paired	MET	FFPE	Lymph node	Lymph node	-0.536999	-0.0555582	0.462761	0.284706	-0.194142	23.2794	20.7057	-0.415563	LumA	Lums-HER2E	Paired_Lums-HER2E	POS	NEG	POS	POS	NEG	POS
A21.LivMet.2.R0i	RAP	UNC	A21_MET-3	Paired	MET	FF	Liver	Liver	-0.374694	-0.211333	0.558031	-0.0569988	0.342905	12.1354	6.20175	-0.670859	LumA	Lums-HER2E	Paired_Lums-HER2E	POS	NEG	POS	POS	NEG	POS
A21.LivMet.3.R0i	RAP	UNC	A21_MET-4	Paired	MET	FF	Liver	Liver	-0.601056	-0.254742	0.786218	-0.000336134	0.346363	1.86583	7.14227	-0.583107	LumA	Lums-HER2E	Paired_Lums-HER2E	POS	NEG	POS	POS	NEG	POS
A23.PTcore2009.FFPER0i	RAP	UNC	A23_PRIM	Paired	PRIM	FFPE	Breast	Breast	0.608643	-0.0187755	-0.558031	-0.0834094	-0.151116	65.6535	60.7597	0.352551	Basal	Basal	Paired_Basal	NEG	NEG	NEG	NEG	NEG	NEG
A23.AdrenalMet.ROi	RAP	UNC	A23_MET-1	Paired	MET	FF	Adrenal	Rest	-0.0329892	-0.289508	0.107419	-0.189052	0.310252	29.1527	27.2972	-0.231637	Normal	Normal	Paired_Basal	NEG	NEG	NEG	NEG	NEG	NEG
A23.BrainMet.2.R0i	RAP	UNC	A23_MET-2	Paired	MET	FF	Brain	Brain	0.814646	-0.0286675	-0.643697	-0.195198	0.022521	68.2107	63.9295	0.426949	Basal	Basal	Paired_Basal	NEG	NEG	NEG	NEG	NEG	NEG
A23.BrainMet.3.R0i	RAP	UNC	A23_MET-3	Paired	MET	FF	Brain	Brain	0.723313	-0.00523409	-0.606819	-0.217095	0.0117647	66.2071	62.1537	0.390874	Basal	Basal	Paired_Basal	NEG	NEG	NEG	NEG	NEG	NEG
A23.BrainMet.ROi	RAP	UNC	A23_MET-4	Paired	MET	FF	Brain	Brain	0.621801	-0.099928	-0.473037	-0.355006	0.124226	56.4636	53.4759	0.249771	Basal	Basal	Paired_Basal	NEG	NEG	NEG	NEG	NEG	NEG
A23.LN.Met.2010postT.FFPER0i	RAP	UNC	A23_MET-5	Paired	MET	FFPE	Lymph node	Lymph node	0.639472	0.0883073	-0.670684	0.0971429	-0.262425	75.0657	73.709	0.597905	Basal	Basal	Paired_Basal	NEG	NEG	NEG	NEG	NEG	NEG
A23.LN.Met.ROi	RAP	UNC	A23_MET-6	Paired	MET	FF	Lymph node	Lymph node	-0.0807203	-0.415798	0.282209	-0.204226	0.278655	19.5646	17.23	-0.407385	LumA	Lums-HER2E	Paired_Basal	NEG	NEG	NEG	NEG	NEG	NEG
A23.PleuraMet.ROi	RAP	UNC	A23_MET-7	Paired	MET	FF	Pleura	Rest	0.655222	0.0104202	-0.524514	-0.106555	0.0187755	64.536	58.5252	0.303394	Basal	Basal	Paired_Basal	NEG	NEG	NEG	NEG	NEG	NEG
A24.PrimT.FFPER0i	RAP	UNC	A24_PRIM	Unpaired	PRIM	FFPE	Breast	Breast	-0.106989	0.452592	-0.00979615	0.121299	-0.187183	49.7191	43.1521	-0.0636818	Her2	Lums-HER2E	Unpaired	POS	POS	POS	POS	POS	POS
A25.PrimT.FFPER0i	RAP	UNC	A25_PRIM	Unpaired	PRIM	FFPE	Breast	Breast	-0.370468	-0.527395	0.766242	-0.340216	0.57599	-5.84625	-11.7988	-0.958389	LumA	Lums-HER2E	Unpaired	NEG	POS	NA	NEG	POS	POS
A28.PrimT.FFPER0i	RAP	UNC	A28_PRIM	Paired	PRIM	FFPE	Breast	Breast	0.18108	-0.383721	0.28	-0.51539	0.532293	16.2202	12.33	-0.491521	Normal	Normal	Paired_Normal	POS	POS	POS	POS	POS	POS
A28.AdrenalMet.ROi	RAP	UNC	A28_MET-1	Paired	MET	FF	Adrenal	Rest	0.0354862	0.571092	-0.532293	0.595486	-0.753758	81.7513	86.0745	0.774258	LumB	Lums-HER2E	Paired_Normal	POS	POS	NA	POS	POS	NEG
A28.DuraMat.Met.ROi	RAP	UNC	A28_MET-2	Paired	MET	FF	Dura	Rest	0.117695	0.521921	-0.503289	0.467083	-0.565618	78.0879	78.8006	0.628765	Her2	Lums-HER2E	Paired_Normal	POS	POS	NA	POS	POS	NEG
A28.LivMet.1.ROi	RAP	UNC	A28_MET-3	Paired	MET	FF	Liver	Liver	-0.541993	0.214406	0.253301	0.463818	-0.327539	38.8921	34.9915	-0.197058	LumB	Lums-HER2E	Paired_Normal	POS	POS	NA	POS	POS	POS
A28.LungMet.LLL.ROi	RAP	UNC	A28_MET-4	Paired	MET	FF	Lung	Lung	-0.120288	0.663289	-0.378727	0.461417	-0.611717	73.7243	74.3348	0.522904	Her2	Lums-HER2E	Paired_Normal	POS	POS	NA	POS	POS	NEG
A28.LungMet.RUL.ROi	RAP	UNC	A28_MET-5	Paired	MET	FF	Lung	Lung	-0.275102	0.237455	0.0470108	0.2509	-0.276255	45.5433	42.5656	-0.0377986	LumB	Lums-HER2E	Paired_Normal	POS	POS	NA	POS	POS	POS
A28.PancreasMet.ROi	RAP	UNC	A28_MET-6	Paired	MET	FF	Pancreas	Rest	-0.425893	0.227088	0.192177	0.128406	-0.102956	36.5784	29.8064	-0.297814	Her2	Lums-HER2E	Paired_Normal	POS	POS	NA	POS	POS	NEG
A29.PrimT.FFPER0i	RAP	UNC	A29_PRIM	Unpaired	PRIM	FFPE	Breast	Breast	-0.283745	-0.52048	0.657527	-0.180408	0.404274	1.8636	-4.95853	-0.841661	LumA	Lums-HER2E	Unpaired	POS	NEG	POS	POS	NEG	POS
A30.PrimT.FFPER0i	RAP	UNC	A30_PRIM	Paired	PRIM	FFPE	Breast	Breast	-0.249748	-0.57503	0.69988	-0.418007	0.640336	-4.49679	-7.67406	-0.852056	Normal	Normal	Paired_Normal	NEG	NEG	NEG	NEG	NEG	NEG
A30.BrainMet.L4.ROi	RAP	UNC	A30_MET-1	Paired	MET	FF	Brain	Brain	0.597695	0.0915726	-0.517695	-0.272413	-0.102713	62.3852	55.5487	0.237997	Basal	Basal	Paired_Normal	NEG	NEG	NEG	NEG	NEG	NEG
A30.BrainMet.R.ROi	RAP	UNC	A30_MET-2	Paired	MET	FF	Brain	Brain	0.797359	0.0614166	-0.628619	-0.225738	-0.0843697	68.3106	63.9931	0.418768	Basal	Basal	Paired_Normal	NEG	NEG	NEG	NEG	NEG	NEG
A30.BrainMetOci.ROi	RAP	UNC	A30_MET-3	Paired	MET	FF	Brain	Brain	0.745786	-0.0802401	-0.577623	-0.270588	0.0337575	63.1135	57.3315	0.301196	Basal	Basal	Paired_Normal	NEG	NEG	NEG	NEG	NEG	NEG
A30.LivMet.L.ROi	RAP	UNC	A30_MET-4	Paired	MET	FF	Liver	Liver	0.722353	0.26377	-0.763361	-0.0467227	-0.269052	79.4859	77.8349	0.660774	Basal	Basal	Paired_Normal	NEG	NEG	NEG	NEG	NEG	NEG
A30.LivMet.R.ROi	RAP	UNC	A30_MET-5	Paired	MET	FF	Liver	Liver	0.696711	0.167347	-0.621993	-0.110684	-0.137383	71.0149	68.2877	0.489753	Basal	Basal	Paired_Normal	NEG	NEG	NEG	NEG	NEG	NEG
A31.PrimT.FFPER0i	RAP	UNC	A31_PRIM	Unpaired	PRIM	FFPE	Breast	Breast	0.727347	-0.126146	-0.557839	-0.132677	-0.022521	63.8348	62.0839	0.415323	Basal	Basal	Unpaired	POS	NEG	NA	POS	NEG	NEG
A34.PrimT.FFPER0i	RAP	UNC	A34_PRIM	Paired	PRIM	FFPE	Breast	Breast	-0.327923	-0.510972	0.739448	-0.3309	0.555726	-4.12814	-8.15055	-0.878913	LumA	Lums-HER2E	Paired_Lums-HER2E	POS	NEG	POS	POS	NEG	POS
A34.BrainMet.ROi	RAP	UNC	A34_MET-1	Paired	MET	FF	Brain	Brain	-0.208163	-0.306699	0.521537	-0.111068	0.357407	12.1703	-1.47756	-0.8461	LumA	Lums-HER2E	Paired_Lums-HER2E	POS	NEG	POS	POS	NEG	POS
A34.DuraMet.ROi	RAP	UNC	A34_MET-2	Paired	MET	FF	Dura	Rest	-0.42377	-0.291333	0.740216	-0.0881152	0.33599	2.64646	-7.41794	-0.940876	LumA	Lums-HER2E	Paired_Lums-HER2E	POS	NEG	POS	POS	NEG	POS
A34.LN.Met.R0i	RAP	UNC	A34_MET-3	Paired	MET	FF	Lymph node	Lymph node	-0.647827	0.0554622	0.448836	0.367971	-0.189052	26.3283	26.4965	-0.309217	LumA	Lums-HER2E	Paired_Lums-HER2E	POS	NEG	POS	POS	NEG	POS
A34.LivMet.L.ROi	RAP	UNC	A34_MET-4	Paired	MET	FF	Liver	Liver	-0.737143	-0.0323169	0.626507	0.250804	-0.0047539	15.2742	15.7249	-0.494964	LumA	Lums-HER2E	Paired_Lums-HER2E	POS	NEG	POS	POS	NEG	POS
A34.LivMet.R.ROi	RAP	UNC	A34_MET-5	Paired	MET	FF	Liver	Liver	-0.631309	-0.238896	0.784394	-0.030012	0.260024	1.52782	-4.57074	-0.87673	LumA	Lums-HER2E	Paired_Lums-HER2E	POS	NEG	POS	POS	NEG	POS
A34.PancreasMet.ROi	RAP	UNC	A34_MET-6	Paired	MET	FF	Pancreas	Rest	-0.593854	-0.213733	0.721008	-0.0390396	0.276255	4.55899	-4.5015	-0.896535	LumA	Lums-HER2E	Paired_Lums-HER2E	POS	NEG	POS	POS	NEG	POS
A36.PrimT.FFPER0i	RAP	UNC	A36_PRIM	Unpaired	PRIM	FFPE	Breast	Breast	-0.405906	-0.392845	0.686723	-0.0804322	0.216327	3.59202	5.01288	-0.624086	LumA	Lums-HER2E	Unpaired	POS	NEG	POS	POS	NEG	POS
A38.PrimT.FFPER0i	RAP	UNC	A38_PRIM	Unpaired	PRIM	FFPE	Breast	Breast	-0.1103	-0.0594958	0.258199	0.0609364	-0.0690996	30.0732	24.2521	-0.349414	LumA	Lums-HER2E	Unpaired	POS	POS	NA	POS	POS	POS

## Sheet: Survival data
Sample	First Primary Receptor at diagnosis	Metastasis original receptors	Primary OS days	Primary OS months	OS Event_censor_180 months	OS months_censor_180 months	Metastasis OS Event	Metastasis OS days	Metastasis OS months	Metastasis OS Event_censored_96 months	Metastasis OS months_censor_96 months	Primary OS Event
AD9E	HER2+	HR+/HER2-	3980	130.85	1	130.85	1	1241	40.8	1	40.8	1
AD9F	HR+/HER2-	HR+/HER2-	3916	128.75	1	128.75	1	1878	61.7	1	61.7	1
AD9G	TNBC	TNBC	1116	36.69	1	36.69	1	712	23.4	1	23.4	1
AD9H	HR+/HER2-	HR+/HER2-	5171	170.01	1	170.01	1	2335	76.8	1	76.8	1
AD9I	HR+/HER2-	HR+/HER2-	8467	278.37	0	180	1	615	20.2	1	20.2	1
AD9J	HR+/HER2-	HR+/HER2-	1223	40.21	1	40.21	1	163	5.4	1	5.4	1
AER2	NA	HR+/HER2-	7951	261.4	0	180	1	4908	161.4	0	96	1
AER4	HR+/HER2-	HR+/HER2-	2064	67.86	1	67.86	1	1139	37.4	1	37.4	1
AER5	TNBC	TNBC	1616	53.13	1	53.13	1	218	7.2	1	7.2	1
AER6	HER2+	TNBC	1479	48.62	1	48.62	1	196	6.4	1	6.4	1
AER7	TNBC	TNBC	1150	37.81	1	37.81	1	498	16.4	1	16.4	1
AER8	HR+/HER2-	HR+/HER2-	864	28.41	1	28.41	1	262	8.6	1	8.6	1
AFE4	HER2+	HR+/HER2-	1466	48.2	1	48.2	1	548	18	1	18	1
AFE5	HR+/HER2-	TNBC	3377	111.02	1	111.02	1	919	30.2	1	30.2	1
AFE6	HER2+	HR+/HER2-	400	13.15	1	13.15	1	40	1.3	1	1.3	1
AFE7	TNBC	TNBC	1040	34.19	1	34.19	1	291	9.6	1	9.6	1
AFE9	HR+/HER2-	TNBC	2691	88.47	1	88.47	1	567	18.6	1	18.6	1
AFEA	TNBC	TNBC	1056	34.72	1	34.72	1	618	20.3	1	20.3	1
AFEC	TNBC	TNBC	77	2.53	1	2.53	1	77	2.5	1	2.5	1
ADCB	HR+/HER2-	HER2+	7608	250.13	0	180	0	1170	38.5	0	38.5	0
AFUG	NA	HR+/HER2-	4748	156.1	1	156.1	1	2406	79.1	1	79.1	1
AFUP	NA	HR+/HER2-	2008	66.02	1	66.02	1	1247	41	1	41	1
AFUI	TNBC	HR+/HER2-	1034	33.99	0	33.99	0	914	30	0	30	0
AFUK	NA	HR+/HER2-	4413	145.08	1	145.08	1	2345	77.1	1	77.1	1
AFUL	HR+/HER2-	HR+/HER2-	3014	99.09	1	99.09	1	1278	42	1	42	1
AFUM	TNBC	HR+/HER2-	1369	45.01	1	45.01	1	699	23	1	23	1
AFUN	HR+/HER2-	HR+/HER2-	5844	192.13	0	180	1	2100	69	1	69	1
AFUO	NA	HR+/HER2-	4445	146.14	1	146.14	1	2648	87.1	1	87.1	1
AE5G	HER2+	HER2+	1711	56.25	1	56.25	1	1711	56.3	1	56.3	1
AE5H	TNBC	TNBC	1691	55.59	1	55.59	1	647	21.3	1	21.3	1
AEPZ	HR+/HER2-	HR+/HER2-	717	23.57	0	23.57	0	307	10.1	0	10.1	0
AFKF	HR+/HER2-	HR+/HER2-	2292	75.35	1	75.35	1	430	14.1	1	14.1	1
AFKB	NA	HR+/HER2-	11713	385.08	0	180	1	844	27.7	1	27.7	1
AFKD	HER2+	NA	1409	46.32	1	46.32	1	912	30	1	30	1
AG0M	TNBC	TNBC	1741	57.24	1	57.24	1	690	22.7	1	22.7	1
AG0N	TNBC	TNBC	1569	51.58	1	51.58	1	468	15.4	1	15.4	1
AG12	HER2+	HER2+	1240	40.77	0	40.77	0	1240	40.8	0	40.8	0
AE6X	TNBC	TNBC	837	27.52	1	27.52	1	254	8.4	1	8.4	1
AE6Y	TNBC	TNBC	499	16.41	1	16.41	1	346	11.4	1	11.4	1
AERW	HER2+	HER2+	1680	55.23	1	55.23	1	1500	49.3	1	49.3	1
AERX	NA	HER2+	4633	152.32	0	152.32	0	573	18.8	0	18.8	0
AERY	HER2+	HER2+	1098	36.1	1	36.1	1	1098	36.1	1	36.1	1
AG0J	TNBC	TNBC	1477	48.56	1	48.56	1	454	14.9	1	14.9	1
AFR2	HR+/HER2-	HR+/HER2-	2471	81.24	0	81.24	0	1935	63.6	0	63.6	0
AFR3	HR+/HER2-	HER2+	952	31.3	1	31.3	1	99	3.3	1	3.3	1
AFR4	TNBC	TNBC	509	16.73	1	16.73	1	509	16.7	1	16.7	1
AFR5	TNBC	TNBC	671	22.06	1	22.06	1	262	8.6	1	8.6	1
AFSO	NA	HER2+	1760	57.86	0	57.86	0	696	22.9	0	22.9	0
AFSP	NA	TNBC	5399	177.5	0	177.5	0	1922	63.2	0	63.2	0
AFSL	TNBC	TNBC	232	7.63	1	7.63	1	78	2.6	1	2.6	1
AF94	HR+/HER2-	HR+/HER2-	1764	57.99	1	57.99	1	888	29.2	1	29.2	1
AF95	TNBC	TNBC	10051	330.44	0	180	1	1587	52.2	1	52.2	1
AF98	HER2+	HER2+	941	30.94	1	30.94	1	688	22.6	1	22.6	1
AF99	HR+/HER2-	HR+/HER2-	1056	34.72	1	34.72	1	732	24.1	1	24.1	1
AF9A	TNBC	TNBC	867	28.5	0	28.5	0	128	4.2	0	4.2	0

## Sheet: GEICAM 2009-03 ConvertHER study
Sample Name	Study	Institution	Short name	Pairs	PvsM	Tissue type	Anatomic Site	Anatomic Site Groups	Corr_Basal	Corr_Her2	Corr_LumA	Corr_LumB	Corr_Normal	ROR_S	ROR-P (Subtype + Proliferation)	Proliferation Score	PAM50 Call	Groups PAM50 Gene expression analysis	Pairs-PAM50-Prim (Primary-metastatic pairs based on primary PAM50 subtype)	ER	HER2	PR
AP_01_07-16691-A1-PRIMARY	GEICAM	GEICAM/Spain	GM-PRIM-1	Paired	PRIM	FFPE	Breast	Breast	-0.109436	-0.178968	0.315438	-0.432989	0.330516	17.6932	8.09127	-0.64268	Normal	Normal	Paired_Normal	POS	NEG	POS
AP_02_10-585-A1-METASTASIS	GEICAM	GEICAM/Spain	GM-MET-1	Paired	MET	FFPE	Liver	Liver	-0.14497	0.285474	-0.0765906	0.144874	-0.1806	50.2429	47.7055	0.0625155	Her2	Normal	Paired_Normal	POS	NEG	NEG
AP_03_08-15549-A1-PRIMARY	GEICAM	GEICAM/Spain	GM-PRIM-2	Paired	PRIM	FFPE	Breast	Breast	0.213349	0.361921	-0.294598	-0.124514	-0.0618007	57.6716	43.4659	-0.080598	Her2	Lums-HER2E	Paired_Lums-HER2E	NEG	POS	NEG
AP_04_10-23931-A1-METASTASIS	GEICAM	GEICAM/Spain	GM-MET-2	Paired	MET	FFPE	Liver	Liver	0.116447	0.631981	-0.443842	0.248788	-0.430396	73.5814	62.0743	0.23479	Her2	Lums-HER2E	Paired_Lums-HER2E	NEG	POS	NEG
AP_05_10-3956-A17-PRIMARY	GEICAM	GEICAM/Spain	GM-PRIM-3	Paired	PRIM	FFPE	Breast	Breast	-0.298824	-0.447011	0.435198	-0.182617	0.391981	12.0459	16.4597	-0.38109	LumA	Lums-HER2E	Paired_Lums-HER2E	POS	NEG	POS
AP_06_12-8214-A1-METASTASIS	GEICAM	GEICAM/Spain	GM-MET-3	Paired	MET	FFPE	Liver	Liver	-0.242545	0.237359	-0.103481	0.310828	-0.344634	52.9436	61.069	0.375891	LumB	Lums-HER2E	Paired_Lums-HER2E	POS	NEG	POS
AP_07_10-5212-A2-PRIMARY	GEICAM	GEICAM/Spain	GM-PRIM-4	Paired	PRIM	FFPE	Breast	Breast	-0.226218	-0.580216	0.722449	-0.435486	0.711116	-5.68415	-18.2216	-1.10689	LumA	Lums-HER2E	Paired_Lums-HER2E	POS	NEG	POS
AP_08_12-10309-A1-METASTASIS	GEICAM	GEICAM/Spain	GM-MET-4	Paired	MET	FFPE	Liver	Liver	-0.200768	0.229676	-0.187995	0.569844	-0.422713	60.8724	67.0605	0.466508	LumB	Lums-HER2E	Paired_Lums-HER2E	POS	NEG	NEG
AP_11_13-17590-A1-PRIMARY	GEICAM	GEICAM/Spain	GM-PRIM-5	Paired	PRIM	FFPE	Breast	Breast	-0.541897	-0.234958	0.579256	0.105498	0.0431693	12.7981	16.305	-0.430518	LumA	Lums-HER2E	Paired_Lums-HER2E	POS	NEG	POS
AP_12_13-16664-A1-METASTASIS	GEICAM	GEICAM/Spain	GM-MET-5	Paired	MET	FFPE	Skin	Rest	-0.494358	-0.259928	0.713998	-0.156495	0.323121	2.70088	-2.01545	-0.809238	LumA	Lums-HER2E	Paired_Lums-HER2E	POS	NEG	POS
AP_13_06-19197-A3-PRIMARY	GEICAM	GEICAM/Spain	GM-PRIM-6	Paired	PRIM	FFPE	Breast	Breast	-0.569268	0.101369	0.334262	0.304106	-0.215174	31.0723	29.0541	-0.277064	LumA	Lums-HER2E	Paired_Lums-HER2E	POS	NEG	POS
AP_14_06-17124-A1-METASTASIS	GEICAM	GEICAM/Spain	GM-MET-6	Paired	MET	FFPE	Skin	Rest	-0.554958	-0.0266507	0.401681	0.18617	-0.0991597	24.4987	27.7704	-0.246933	LumA	Lums-HER2E	Paired_Lums-HER2E	POS	NEG	POS
AP_15_06-17336-B1-PRIMARY	GEICAM	GEICAM/Spain	GM-PRIM-7	Paired	PRIM	FFPE	Breast	Breast	0.53431	0.2194	-0.627659	-0.0311645	-0.192797	72.5385	69.6639	0.500033	Basal	Basal	Paired_Basal	NEG	POS	NEG
AP_16_06-17336-A1-METASTASIS	GEICAM	GEICAM/Spain	GM-MET-7	Paired	MET	FFPE	Skin	Rest	0.564754	0.111357	-0.578487	-0.13527	-0.0538295	67.3255	65.5854	0.448799	Basal	Basal	Paired_Basal	POS	POS	NEG
AP_17_06-17828-A1-PRIMARY	GEICAM	GEICAM/Spain	GM-PRIM-8	Paired	PRIM	FFPE	Breast	Breast	-0.594046	-0.0216567	0.464394	0.29575	-0.125186	23.611	22.6057	-0.376093	LumA	Lums-HER2E	Paired_Lums-HER2E	POS	NEG	POS
AP_18_06-17828-B1-METASTASIS	GEICAM	GEICAM/Spain	GM-MET-8	Paired	MET	FFPE	Skin	Rest	0.0726531	0.136615	-0.240528	0.257719	-0.304586	57.8203	61.2703	0.371636	LumB	Lums-HER2E	Paired_Lums-HER2E	POS	NEG	POS
AP_19_06-21369-A1-PRIMARY	GEICAM	GEICAM/Spain	GM-PRIM-9	Paired	PRIM	FFPE	Breast	Breast	-0.296999	0.101561	0.148523	0.279904	-0.295078	39.7186	42.9565	0.0240527	LumB	Normal	Paired_Normal	POS	NEG	POS
AP_20_06-21369-B1-METASTASIS	GEICAM	GEICAM/Spain	GM-MET-9	Paired	MET	FFPE	Skin	Rest	0.122785	-0.407251	0.234094	-0.446339	0.424154	18.644	13.5457	-0.479315	Normal	Normal	Paired_Normal	POS	NEG	POS
AP_21_04-24693-A1-PRIMARY	GEICAM	GEICAM/Spain	GM-PRIM-10	Paired	PRIM	FFPE	Breast	Breast	-0.538151	-0.217479	0.54593	0.0937815	0.0554622	14.2585	13.2375	-0.518767	LumA	Normal	Paired_Normal	POS	NA	POS
AP_22_06-26149-B1-METASTASIS	GEICAM	GEICAM/Spain	GM-MET-10	Paired	MET	FFPE	Skin	Rest	-0.00715486	-0.347899	0.393902	-0.514622	0.467371	11.1045	10.3178	-0.517987	Normal	Normal	Paired_Normal	POS	NEG	POS
AP_23_03-9063-A-PRIMARY	GEICAM	GEICAM/Spain	GM-PRIM-11	Paired	PRIM	FFPE	Breast	Breast	0.541801	-0.306795	-0.208067	-0.564274	0.399088	38.55	36.4037	-0.0318374	Basal	Basal	Paired_Basal	NEG	NEG	NEG
AP_24_06-12720-A1-METASTASIS	GEICAM	GEICAM/Spain	GM-MET-11	Paired	MET	FFPE	Lung	Lung	0.676447	-0.0822569	-0.528067	-0.277695	0.134214	60.5674	57.9812	0.332696	Basal	Basal	Paired_Basal	NA	NEG	POS
AP_27_07-13874-A1-PRIMARY	GEICAM	GEICAM/Spain	GM-PRIM-12	Paired	PRIM	FFPE	Breast	Breast	-0.431068	-0.00590636	0.382089	0.120192	-0.0785114	25.1255	23.2194	-0.360999	LumA	Lums-HER2E	Paired_Lums-HER2E	POS	NEG	POS
AP_28_07-13874-B1-METASTASIS	GEICAM	GEICAM/Spain	GM-MET-12	Paired	MET	FFPE	Lymph node	Lymph node	0.072461	0.191261	-0.426939	0.316783	-0.345498	67.3358	66.5729	0.432599	LumB	Lums-HER2E	Paired_Lums-HER2E	POS	NEG	POS
AP_29_07-18854-A3-PRIMARY	GEICAM	GEICAM/Spain	GM-PRIM-13	Paired	PRIM	FFPE	Breast	Breast	-0.425786	-0.476591	0.61527	-0.131525	0.346843	4.37288	12.9299	-0.420854	LumA	Lums-HER2E	Paired_Lums-HER2E	POS	NEG	NEG
AP_30_07-18852-A1-METASTASIS	GEICAM	GEICAM/Spain	GM-MET-13	Paired	MET	FFPE	Lymph node	Lymph node	-0.403601	-0.0543097	0.277023	0.284898	-0.0615126	31.6611	42.3857	0.0766949	LumB	Lums-HER2E	Paired_Lums-HER2E	POS	NEG	NEG
AP_31_07-18866-A4-PRIMARY	GEICAM	GEICAM/Spain	GM-PRIM-14	Paired	PRIM	FFPE	Breast	Breast	0.515006	0.31102	-0.752413	0.0964706	-0.343385	81.0925	77.0101	0.612033	Basal	Basal	Paired_Basal	NEG	NEG	NEG
AP_32_07-18863-A2-METASTASIS	GEICAM	GEICAM/Spain	GM-MET-14	Paired	MET	FFPE	Lymph node	Lymph node	0.428764	0.225258	-0.698439	0.175798	-0.336855	78.4965	76.7693	0.626895	Basal	Basal	Paired_Basal	NEG	NEG	NEG
AP_33_07-19564-A2-PRIMARY	GEICAM	GEICAM/Spain	GM-PRIM-15	Paired	PRIM	FFPE	Breast	Breast	-0.0572869	-0.528836	0.603169	-0.64994	0.851333	-2.73522	-9.79327	-0.90756	Normal	Normal	Paired_Normal	POS	NEG	POS
AP_34_07-19564-B4-METASTASIS	GEICAM	GEICAM/Spain	GM-MET-15	Paired	MET	FFPE	Lymph node	Lymph node	-0.393229	-0.0253061	0.191261	0.18425	-0.0936855	34.0101	39.2784	-0.0166663	LumA	Normal	Paired_Normal	POS	NEG	NEG
AP_35_08-3910-A6-PRIMARY	GEICAM	GEICAM/Spain	GM-PRIM-16	Paired	PRIM	FFPE	Breast	Breast	-0.432221	-0.143433	0.309004	0.32485	-0.188571	29.5545	33.0529	-0.136336	LumB	Lums-HER2E	Paired_Lums-HER2E	POS	NEG	POS
AP_36_08-3926-A1-METASTASIS	GEICAM	GEICAM/Spain	GM-MET-16	Paired	MET	FFPE	Lymph node	Lymph node	-0.303145	-0.180792	0.149292	0.336182	-0.248403	36.4561	43.4266	0.0855965	LumB	Lums-HER2E	Paired_Lums-HER2E	POS	NEG	POS
AP_53_MX027P-PRIMARY	GEICAM	GEICAM/Spain	GM-PRIM-17	Paired	PRIM	FFPE	Breast	Breast	-0.215462	0.27904	-0.200768	0.323409	-0.394766	57.9324	65.5439	0.450626	LumB	Lums-HER2E	Paired_Lums-HER2E	POS	NEG	POS
AP_54_MX027M-METASTATIC	GEICAM	GEICAM/Spain	GM-MET-17	Paired	MET	FFPE	Pleura	Rest	-0.465258	0.0372149	0.378824	0.191453	-0.0390396	26.9156	33.2504	-0.129341	LumA	Lums-HER2E	Paired_Lums-HER2E	POS	NEG	POS
AP_55_MX035P-PRIMARY	GEICAM	GEICAM/Spain	GM-PRIM-18	Paired	PRIM	FFPE	Breast	Breast	-0.42012	0.0461465	0.171477	0.339832	-0.299112	38.3466	43.5574	0.0478521	LumB	Lums-HER2E	Paired_Lums-HER2E	POS	NEG	NEG
AP_56_MX035M-METASTATIC	GEICAM	GEICAM/Spain	GM-MET-18	Paired	MET	FFPE	Bone	Rest	-0.530372	0.0932053	0.258391	0.392365	-0.177527	35.7662	42.5223	0.0287067	LumB	Lums-HER2E	Paired_Lums-HER2E	POS	NEG	NEG
AP_57_MX044P-PRIMARY	GEICAM	GEICAM/Spain	GM-PRIM-19	Paired	PRIM	FFPE	Breast	Breast	-0.15054	-0.226507	0.33964	-0.238703	0.367299	19.0379	22.5612	-0.291252	Normal	Normal	Paired_Normal	NEG	NEG	NEG
AP_58_MX044M-METASTATIC	GEICAM	GEICAM/Spain	GM-MET-19	Paired	MET	FFPE	Lymph node	Lymph node	-0.367203	0.200096	0.00619448	0.435774	-0.290756	49.3225	56.9592	0.292586	LumB	Normal	Paired_Normal	POS	NEG	NEG
AP_59_MX059P-PRIMARY	GEICAM	GEICAM/Spain	GM-PRIM-20	Paired	PRIM	FFPE	Breast	Breast	-0.181945	0.471789	-0.0880192	0.311405	-0.290372	56.0509	56.2975	0.212565	Her2	Lums-HER2E	Paired_Lums-HER2E	POS	NEG	POS
AP_60_MX059M-METASTATIC	GEICAM	GEICAM/Spain	GM-MET-20	Paired	MET	FFPE	Skin	Rest	-0.122305	0.462761	-0.121152	0.264826	-0.284994	56.8085	58.4007	0.264864	Her2	Lums-HER2E	Paired_Lums-HER2E	POS	NEG	POS
AP_63_MX254P-PRIMARY	GEICAM	GEICAM/Spain	GM-PRIM-22	Paired	PRIM	FFPE	Breast	Breast	-0.0505642	-0.00590636	0.373061	-0.475726	0.51952	17.4198	10.8972	-0.585027	Normal	Normal	Paired_Normal	POS	POS	POS
AP_64_MX254M-METASTATIC	GEICAM	GEICAM/Spain	GM-MET-22	Paired	MET	FFPE	Liver	Liver	-0.0467227	0.615558	-0.378631	0.353758	-0.454982	71.5844	69.3317	0.422961	Her2	Normal	Paired_Normal	POS	POS	POS
AP_65_MX255P-PRIMARY	GEICAM	GEICAM/Spain	GM-PRIM-23	Paired	PRIM	FFPE	Breast	Breast	-0.186267	-0.511068	0.527395	-0.362113	0.526627	4.84053	3.47479	-0.641647	LumA	Lums-HER2E	Paired_Lums-HER2E	POS	NEG	POS
AP_66_MX255M-METASTATIC	GEICAM	GEICAM/Spain	GM-MET-23	Paired	MET	FFPE	Liver	Liver	-0.229772	-0.197599	0.0988715	0.148235	-0.0035054	35.5203	46.3779	0.176569	LumB	Lums-HER2E	Paired_Lums-HER2E	POS	NEG	POS
AP_67_MX258P-PRIMARY	GEICAM	GEICAM/Spain	GM-PRIM-24	Paired	PRIM	FFPE	Breast	Breast	-0.3697	0.0343337	-0.00936374	0.526146	-0.32898	49.035	50.2221	0.139764	LumB	Lums-HER2E	Paired_Lums-HER2E	POS	NEG	POS
AP_68_MX258M-METASTATIC	GEICAM	GEICAM/Spain	GM-MET-24	Paired	MET	FFPE	Lung	Lung	-0.158992	0.0714046	-0.156687	0.379688	-0.338583	54.2804	64.526	0.471871	LumB	Lums-HER2E	Paired_Lums-HER2E	POS	NEG	NEG
AP_39_04-7626-PRIMARY	GEICAM	GEICAM/Spain	GM-PRIM-25	Paired	PRIM	FFPE	Breast	Breast	-0.485522	0.0736134	0.247923	0.422137	-0.257527	36.6327	38.7068	-0.0702551	LumB	Lums-HER2E	Paired_Lums-HER2E	POS	NEG	POS
AP_40_13-17721-A3-METASTASIS	GEICAM	GEICAM/Spain	GM-MET-25	Paired	MET	FFPE	Lymph node	Lymph node	-0.136519	0.184922	-0.192509	0.352317	-0.275294	57.084	57.4827	0.265781	LumB	Lums-HER2E	Paired_Lums-HER2E	POS	NEG	NEG
AP_43_S13-6720-PRIMARY	GEICAM	GEICAM/Spain	GM-PRIM-27	Paired	PRIM	FFPE	Breast	Breast	-0.0909004	0.41551	-0.384106	0.533926	-0.615366	71.6711	76.2706	0.610183	LumB	Lums-HER2E	Paired_Lums-HER2E	POS	NEG	POS
AP_44_M14-682-METASTASIS	GEICAM	GEICAM/Spain	GM-MET-27	Paired	MET	FFPE	Liver	Liver	0.0830252	0.387083	-0.326098	0.171765	-0.248788	63.6552	53.4383	0.112259	Her2	Lums-HER2E	Paired_Lums-HER2E	POS	POS	POS
AP_47_MX009P-PRIMARY	GEICAM	GEICAM/Spain	GM-PRIM-29	Paired	PRIM	FFPE	Breast	Breast	0.74012	-0.123553	-0.509436	-0.39102	0.206915	57.6097	57.5077	0.351186	Basal	Basal	Paired_Basal	NEG	NEG	NEG
AP_48_MX009M-METASTATIC	GEICAM	GEICAM/Spain	GM-MET-29	Paired	MET	FFPE	Lung	Lung	0.680576	0.0492197	-0.475054	-0.385642	0.189244	58.5136	48.2459	0.0920056	Basal	Basal	Paired_Basal	NEG	NEG	NEG
AP_49_MX010P-PRIMARY	GEICAM	GEICAM/Spain	GM-PRIM-30	Paired	PRIM	FFPE	Breast	Breast	-0.411188	0.0367347	0.0992557	0.29018	-0.230156	40.4163	42.2124	0.00296629	LumB	Lums-HER2E	Paired_Lums-HER2E	POS	NEG	POS
AP_50_MX010M-METASTATIC	GEICAM	GEICAM/Spain	GM-MET-30	Paired	MET	FFPE	Pleura	Rest	-0.0135894	0.00484994	-0.346267	0.351741	-0.351933	61.4159	68.3664	0.533101	LumB	Lums-HER2E	Paired_Lums-HER2E	POS	NEG	POS
AP_51_MX024P-PRIMARY	GEICAM	GEICAM/Spain	GM-PRIM-31	Paired	PRIM	FFPE	Breast	Breast	-0.373926	0.218055	0.0652581	0.286531	-0.230828	44.6086	34.8208	-0.228639	LumB	Lums-HER2E	Paired_Lums-HER2E	POS	NEG	POS
AP_52_MX024M-METASTATIC	GEICAM	GEICAM/Spain	GM-MET-31	Paired	MET	FFPE	Skin	Rest	-0.436543	0.149388	0.355294	0.0953181	0.0368307	28.0709	18.7394	-0.509172	LumA	Lums-HER2E	Paired_Lums-HER2E	POS	NEG	POS
AP_101_MX366P-PRIMARY	GEICAM	GEICAM/Spain	GM-PRIM-32	Paired	PRIM	FFPE	Breast	Breast	-0.554382	-0.00484994	0.283457	0.268956	-0.161681	31.1064	35.3693	-0.105882	LumA	Lums-HER2E	Paired_Lums-HER2E	POS	NEG	POS
AP_102_MX366M-METASTATIC	GEICAM	GEICAM/Spain	GM-MET-32	Paired	MET	FFPE	Bone	Rest	-0.594718	0.0156062	0.487347	0.155822	0.0662185	20.8629	30.3261	-0.163008	LumA	Lums-HER2E	Paired_Lums-HER2E	POS	NEG	POS
AP_103_MX372P-PRIMARY	GEICAM	GEICAM/Spain	GM-PRIM-33	Paired	PRIM	FFPE	Breast	Breast	-0.486387	-0.185594	0.417623	0.167539	0.0181993	21.5347	29.9809	-0.151538	LumA	Lums-HER2E	Paired_Lums-HER2E	POS	NEG	POS
AP_104_MX372M-METASTATIC	GEICAM	GEICAM/Spain	GM-MET-33	Paired	MET	FFPE	Breast	Breast	-0.362401	0.138055	0.330612	0.174934	-0.0157983	30.6264	36.2874	-0.0845647	LumA	Lums-HER2E	Paired_Lums-HER2E	POS	NEG	NEG
AP_117_MX393P-PRIMARY	GEICAM	GEICAM/Spain	GM-PRIM-34	Paired	PRIM	FFPE	Breast	Breast	-0.558127	-0.355774	0.707371	-0.0737095	0.27395	2.63823	9.80173	-0.507014	LumA	Lums-HER2E	Paired_Lums-HER2E	POS	NEG	POS
AP_118_MX393M-METASTATIC	GEICAM	GEICAM/Spain	GM-MET-34	Paired	MET	FFPE	Bone	Rest	-0.428764	-0.120768	0.215462	0.35904	-0.174454	34.3534	45.2394	0.133762	LumB	Lums-HER2E	Paired_Lums-HER2E	POS	NEG	POS
AP_199_047-002P-PRIMARY	GEICAM	GEICAM/Spain	GM-PRIM-36	Paired	PRIM	FFPE	Breast	Breast	0.21575	0.607971	-0.47928	0.0967587	-0.284706	72.648	55.0699	0.0762957	Her2	Lums-HER2E	Paired_Lums-HER2E	NEG	POS	NEG
AP_200_047-002M-METASTATIC	GEICAM	GEICAM/Spain	GM-MET-36	Paired	MET	FFPE	Lung	Lung	0.208163	0.722449	-0.576855	0.172533	-0.419928	79.6014	66.9294	0.312181	Her2	Lums-HER2E	Paired_Lums-HER2E	NEG	POS	NEG
AP_207_066-001P-PRIMARY	GEICAM	GEICAM/Spain	GM-PRIM-37	Paired	PRIM	FFPE	Breast	Breast	-0.314478	0.204994	0.0686194	0.135366	-0.202401	42.0445	55.2871	0.311082	Her2	Lums-HER2E	Paired_Lums-HER2E	POS	NEG	POS
AP_208_066-001M-METASTATIC	GEICAM	GEICAM/Spain	GM-MET-37	Paired	MET	FFPE	Pleura	Rest	-0.48994	-0.0868667	0.325042	0.297479	-0.0689076	28.9758	40.9586	0.0589469	LumA	Lums-HER2E	Paired_Lums-HER2E	POS	NEG	NEG
AP_225_068-002P-PRIMARY	GEICAM	GEICAM/Spain	GM-PRIM-38	Paired	PRIM	FFPE	Breast	Breast	-0.0285714	0.448259	-0.39976	0.48389	-0.580504	72.2724	72.0348	0.500189	LumB	Lums-HER2E	Paired_Lums-HER2E	POS	NEG	NEG
AP_226_068-002M-METASTATIC	GEICAM	GEICAM/Spain	GM-MET-38	Paired	MET	FFPE	Skin	Rest	-0.0719808	0.434718	-0.152845	0.214022	-0.299688	57.1107	54.1453	0.162382	Her2	Lums-HER2E	Paired_Lums-HER2E	POS	NEG	NEG
AP_227_074-001P-PRIMARY	GEICAM	GEICAM/Spain	GM-PRIM-42	Paired	PRIM	FFPE	Breast	Breast	-0.426363	-0.0441297	0.14497	0.222281	-0.242449	36.1247	39.3093	-0.0306853	LumB	Lums-HER2E	Paired_Lums-HER2E	POS	NEG	POS
AP_228_074-001M-METASTATIC	GEICAM	GEICAM/Spain	GM-MET-42	Paired	MET	FFPE	Bone	Rest	-0.299784	-0.0340456	0.0891717	0.279808	-0.126339	40.1746	47.3398	0.145173	LumB	Lums-HER2E	Paired_Lums-HER2E	POS	NEG	POS
AP_229_074-005P-PRIMARY	GEICAM	GEICAM/Spain	GM-PRIM-43	Paired	PRIM	FFPE	Breast	Breast	0.742233	-0.0603601	-0.595006	-0.135942	0.0212725	66.3596	57.8885	0.286591	Basal	Basal	Paired_Basal	POS	NEG	NEG
AP_230_074-005M-METASTATIC	GEICAM	GEICAM/Spain	GM-MET-43	Paired	MET	FFPE	Skin	Rest	0.626507	0.0469148	-0.705354	0.0936855	-0.236014	75.7738	69.6338	0.494765	Basal	Basal	Paired_Basal	NEG	NEG	NEG
AP_85_MX346P-PRIMARY	GEICAM	GEICAM/Spain	GM-PRIM-44	Paired	PRIM	FFPE	Breast	Breast	-0.325714	-0.123265	0.18473	0.275006	-0.117023	34.696	39.4155	-0.00806963	LumB	Lums-HER2E	Paired_Lums-HER2E	POS	NEG	POS
AP_86_MX346M-METASTATIC	GEICAM	GEICAM/Spain	GM-MET-44	Paired	MET	FFPE	Ovarian	Rest	-0.222857	-0.092437	0.362113	-0.0966627	0.352509	22.0896	25.2942	-0.264633	LumA	Lums-HER2E	Paired_Lums-HER2E	POS	NEG	POS
AP_87_MX347P-PRIMARY	GEICAM	GEICAM/Spain	GM-PRIM-45	Paired	PRIM	FFPE	Breast	Breast	-0.101176	0.147563	-0.176086	0.26012	-0.281921	54.4886	54.923	0.227303	LumB	Lums-HER2E	Paired_Lums-HER2E	POS	NEG	POS
AP_88_MX347M-METASTATIC	GEICAM	GEICAM/Spain	GM-MET-45	Paired	MET	FFPE	Liver	Liver	-0.460936	0.441056	0.10012	0.455366	-0.389772	48.8264	51.23	0.122735	LumB	Lums-HER2E	Paired_Lums-HER2E	POS	NEG	POS
AP_91_MX351P-PRIMARY	GEICAM	GEICAM/Spain	GM-PRIM-47	Paired	PRIM	FFPE	Breast	Breast	-0.552845	0.0126291	0.412341	0.228235	-0.0183914	25.3468	23.9311	-0.354502	LumA	Lums-HER2E	Paired_Lums-HER2E	POS	NEG	POS
AP_92_MX351M-METASTATIC	GEICAM	GEICAM/Spain	GM-MET-47	Paired	MET	FFPE	Bone	Rest	-0.686242	0.130372	0.464106	0.28	-0.112221	25.1327	24.7079	-0.352437	LumA	Lums-HER2E	Paired_Lums-HER2E	POS	NEG	POS
AP_93_MX353P-PRIMARY	GEICAM	GEICAM/Spain	GM-PRIM-48	Paired	PRIM	FFPE	Breast	Breast	-0.466507	0.0436495	0.349532	0.138055	-0.0433613	27.3251	33.6101	-0.122078	LumA	Lums-HER2E	Paired_Lums-HER2E	POS	NEG	POS
AP_94_MX353M-METASTATIC	GEICAM	GEICAM/Spain	GM-MET-48	Paired	MET	FFPE	Bone	Rest	-0.396014	0.0265546	0.175702	0.235822	-0.128547	36.2642	42.443	0.0402931	LumB	Lums-HER2E	Paired_Lums-HER2E	POS	NEG	POS
AP_95_MX355P-PRIMARY	GEICAM	GEICAM/Spain	GM-PRIM-49	Paired	PRIM	FFPE	Breast	Breast	-0.273854	-0.146026	0.0983914	0.236495	-0.103866	37.5541	49.7063	0.236475	LumB	Lums-HER2E	Paired_Lums-HER2E	POS	NEG	POS
AP_96_MX355M-METASTATIC	GEICAM	GEICAM/Spain	GM-MET-49	Paired	MET	FFPE	Bone	Rest	-0.441921	-0.0245378	0.117407	0.275102	-0.203745	38.3608	47.7126	0.160822	LumB	Lums-HER2E	Paired_Lums-HER2E	POS	NEG	POS
AP_97_MX360P-PRIMARY	GEICAM	GEICAM/Spain	GM-PRIM-50	Paired	PRIM	FFPE	Breast	Breast	-0.0984874	-0.408691	0.467755	-0.511357	0.626411	6.75359	1.74723	-0.700729	Normal	Normal	Paired_Normal	POS	NEG	POS
AP_98_MX360M-METASTATIC	GEICAM	GEICAM/Spain	GM-MET-50	Paired	MET	FFPE	Lymph node	Lymph node	0.0618968	0.142377	-0.275966	0.124994	-0.108956	57.1012	59.193	0.327654	Her2	Normal	Paired_Normal	POS	NEG	POS
AP_99_MX362P-PRIMARY	GEICAM	GEICAM/Spain	GM-PRIM-51	Paired	PRIM	FFPE	Breast	Breast	-0.196062	0.0670828	-0.146507	0.409652	-0.322161	54.1125	64.6607	0.474528	LumB	Normal	Paired_Normal	POS	NEG	POS
AP_100_MX362M-METASTATIC	GEICAM	GEICAM/Spain	GM-MET-51	Paired	MET	FFPE	Liver	Liver	0.0228091	-0.141032	0.147947	-0.108667	0.230156	31.2709	22.6898	-0.377866	Normal	Normal	Paired_Normal	POS	NEG	POS
AP_223_068-001P-PRIMARY	GEICAM	GEICAM/Spain	GM-PRIM-52	Paired	PRIM	FFPE	Breast	Breast	0.143818	0.0947419	-0.376711	0.294502	-0.28	63.8189	70.2823	0.563043	LumB	Lums-HER2E	Paired_Lums-HER2E	POS	NEG	POS
AP_224_068-001M-METASTATIC	GEICAM	GEICAM/Spain	GM-MET-52	Paired	MET	FFPE	Liver	Liver	-0.231885	0.136807	-0.102233	0.532773	-0.37479	55.1811	59.7021	0.330157	LumB	Lums-HER2E	Paired_Lums-HER2E	POS	NEG	POS
AP_231_074-009P-PRIMARY	GEICAM	GEICAM/Spain	GM-PRIM-53	Paired	PRIM	FFPE	Breast	Breast	-0.416951	-0.116062	0.40072	0.171381	-0.0519088	23.6634	16.2733	-0.515075	LumA	Lums-HER2E	Paired_Lums-HER2E	POS	NEG	POS
AP_232_074-009M-METASTATIC	GEICAM	GEICAM/Spain	GM-MET-53	Paired	MET	FFPE	Pleura	Rest	-0.217575	0.176279	0.0259784	0.332053	-0.283265	47.1598	52.404	0.204168	LumB	Lums-HER2E	Paired_Lums-HER2E	POS	NEG	POS
AP_105_MX375P-PRIMARY	GEICAM	GEICAM/Spain	GM-PRIM-54	Paired	PRIM	FFPE	Breast	Breast	-0.450852	0.147659	0.0984874	0.37892	-0.277791	43.3625	48.9567	0.136369	LumB	Lums-HER2E	Paired_Lums-HER2E	NA	NA	NA
AP_106_MX375M-METASTATIC	GEICAM	GEICAM/Spain	GM-MET-54	Paired	MET	FFPE	Lymph node	Lymph node	-0.225258	0.13892	-0.139688	0.42377	-0.317359	54.9749	65.4973	0.480622	LumB	Lums-HER2E	Paired_Lums-HER2E	NA	NA	NA
AP_107_MX381P-PRIMARY	GEICAM	GEICAM/Spain	GM-PRIM-55	Paired	PRIM	FFPE	Breast	Breast	-0.371621	0.059976	0.0390396	0.469676	-0.387179	46.4508	59.8295	0.397592	LumB	Lums-HER2E	Paired_Lums-HER2E	POS	NEG	POS
AP_108_MX381M-METASTATIC	GEICAM	GEICAM/Spain	GM-MET-55	Paired	MET	FFPE	Pleura	Rest	-0.336567	0.234286	-0.0177191	0.403986	-0.36461	50.4354	61.0172	0.385486	LumB	Lums-HER2E	Paired_Lums-HER2E	POS	NEG	POS
AP_109_MX388P-PRIMARY	GEICAM	GEICAM/Spain	GM-PRIM-56	Paired	PRIM	FFPE	Breast	Breast	-0.112797	0.274334	-0.200384	0.426555	-0.421561	60.0807	67.7838	0.493185	LumB	Lums-HER2E	Paired_Lums-HER2E	POS	NEG	POS
AP_110_MX388M-METASTATIC	GEICAM	GEICAM/Spain	GM-MET-56	Paired	MET	FFPE	Bone	Rest	0.116543	0.197791	-0.404178	0.289988	-0.39515	66.2584	68.7245	0.495717	LumB	Lums-HER2E	Paired_Lums-HER2E	POS	NEG	POS
AP_111_MX389P-PRIMARY	GEICAM	GEICAM/Spain	GM-PRIM-57	Paired	PRIM	FFPE	Breast	Breast	-0.505306	-0.0914766	0.380552	0.185498	-0.0540216	24.6585	33.9425	-0.0843991	LumA	Lums-HER2E	Paired_Lums-HER2E	POS	NEG	NEG
AP_112_MX389M-METASTATIC	GEICAM	GEICAM/Spain	GM-MET-57	Paired	MET	FFPE	Liver	Liver	-0.304298	-0.0745738	0.255702	0.0831212	0.0271309	29.3656	34.3741	-0.0966356	LumA	Lums-HER2E	Paired_Lums-HER2E	POS	NEG	POS
AP_113_MX390P-PRIMARY	GEICAM	GEICAM/Spain	GM-PRIM-58	Paired	PRIM	FFPE	Breast	Breast	-0.532101	-0.366531	0.712461	-0.118752	0.342137	1.64521	8.62315	-0.52634	LumA	Lums-HER2E	Paired_Lums-HER2E	NA	NA	NA
AP_114_MX390M-METASTATIC	GEICAM	GEICAM/Spain	GM-MET-58	Paired	MET	FFPE	Lung	Lung	-0.13527	0.341657	-0.226987	0.431645	-0.352701	62.1447	69.6225	0.517306	LumB	Lums-HER2E	Paired_Lums-HER2E	POS	NEG	POS
AP_115_MX391P-PRIMARY	GEICAM	GEICAM/Spain	GM-PRIM-59	Paired	PRIM	FFPE	Breast	Breast	-0.364226	-0.197983	0.432125	0.0520048	0.221705	19.4251	27.0457	-0.201452	LumA	Lums-HER2E	Paired_Lums-HER2E	POS	NA	POS
AP_116_MX391M-METASTATIC	GEICAM	GEICAM/Spain	GM-MET-59	Paired	MET	FFPE	Skin	Rest	-0.381224	-0.0910924	0.54401	-0.100312	0.24072	13.7236	11.9177	-0.549566	LumA	Lums-HER2E	Paired_Lums-HER2E	POS	NEG	NEG
AP_131_005-012P-PRIMARY	GEICAM	GEICAM/Spain	GM-PRIM-60	Paired	PRIM	FFPE	Breast	Breast	-0.413589	-0.565618	0.777383	-0.240624	0.566291	-5.41695	-0.569632	-0.680114	LumA	Lums-HER2E	Paired_Lums-HER2E	POS	NEG	POS
AP_132_005-012M-METASTATIC	GEICAM	GEICAM/Spain	GM-MET-60	Paired	MET	FFPE	Skin	Rest	-0.418776	0.0380792	0.338007	0.0768788	0.0988715	26.9346	31.3228	-0.172562	LumA	Lums-HER2E	Paired_Lums-HER2E	POS	NEG	NEG
AP_133_007-001P-PRIMARY	GEICAM	GEICAM/Spain	GM-PRIM-61	Paired	PRIM	FFPE	Breast	Breast	-0.19491	0.259832	-0.234286	0.460744	-0.449988	61.4383	62.9678	0.360482	LumB	Lums-HER2E	Paired_Lums-HER2E	POS	NEG	POS
AP_134_007-001M-METASTATIC	GEICAM	GEICAM/Spain	GM-MET-61	Paired	MET	FFPE	Lymph node	Lymph node	-0.0980072	0.221609	-0.379496	0.469964	-0.46401	67.5313	68.4455	0.46395	LumB	Lums-HER2E	Paired_Lums-HER2E	POS	NEG	POS
AP_135_007-003P-PRIMARY	GEICAM	GEICAM/Spain	GM-PRIM-62	Paired	PRIM	FFPE	Breast	Breast	-0.496279	-0.270972	0.723025	-0.128355	0.414262	2.62568	1.57619	-0.718363	LumA	Lums-HER2E	Paired_Lums-HER2E	POS	NEG	NEG
AP_136_007-003M-METASTATIC	GEICAM	GEICAM/Spain	GM-MET-62	Paired	MET	FFPE	Skin	Rest	0.223914	0.264826	-0.37383	-0.0327011	-0.0971429	61.1195	55.1625	0.197332	Her2	Lums-HER2E	Paired_Lums-HER2E	NEG	NEG	NEG
AP_141_016-005P-PRIMARY	GEICAM	GEICAM/Spain	GM-PRIM-63	Paired	PRIM	FFPE	Breast	Breast	-0.37479	0.0810084	-0.0427851	0.417431	-0.364418	49.2619	45.8735	0.0274654	LumB	Lums-HER2E	Paired_Lums-HER2E	POS	NEG	POS
AP_142_016-005M-METASTATIC	GEICAM	GEICAM/Spain	GM-MET-63	Paired	MET	FFPE	Liver	Liver	-0.454502	-0.0267467	0.255318	0.226603	-0.0112845	31.7382	40.3631	0.022529	LumA	Lums-HER2E	Paired_Lums-HER2E	POS	NEG	POS
AP_143_016-007P-PRIMARY	GEICAM	GEICAM/Spain	GM-PRIM-64	Paired	PRIM	FFPE	Breast	Breast	-0.168595	-0.115102	0.338391	-0.128932	0.156303	22.4697	19.0619	-0.418305	LumA	Lums-HER2E	Paired_Lums-HER2E	POS	NEG	POS
AP_144_016-007M-METASTATIC	GEICAM	GEICAM/Spain	GM-MET-64	Paired	MET	FFPE	Ovarian	Rest	-0.496759	-0.105306	0.659064	-0.0816807	0.327539	8.48503	2.23623	-0.760454	LumA	Lums-HER2E	Paired_Lums-HER2E	POS	NEG	POS
AP_145_016-009P-PRIMARY	GEICAM	GEICAM/Spain	GM-PRIM-65	Paired	PRIM	FFPE	Breast	Breast	-0.230636	-0.10425	-0.0236735	0.27395	-0.302089	44.0673	53.4519	0.28233	LumB	Lums-HER2E	Paired_Lums-HER2E	POS	NEG	POS
AP_146_016-009M-METASTATIC	GEICAM	GEICAM/Spain	GM-MET-65	Paired	MET	FFPE	Lung	Lung	-0.110204	0.0631453	-0.256567	0.444898	-0.357503	59.6317	66.0228	0.473698	LumB	Lums-HER2E	Paired_Lums-HER2E	POS	NEG	POS
AP_147_016-015P-PRIMARY	GEICAM	GEICAM/Spain	GM-PRIM-66	Paired	PRIM	FFPE	Breast	Breast	-0.488115	-0.101176	0.202401	0.358559	-0.319952	34.8802	43.6462	0.0859869	LumB	Lums-HER2E	Paired_Lums-HER2E	POS	NEG	POS
AP_148_016-015M-METASTATIC	GEICAM	GEICAM/Spain	GM-MET-66	Paired	MET	FFPE	Skin	Rest	-0.430492	-0.0533493	0.107131	0.375462	-0.300168	40.099	43.7483	0.0496834	LumB	Lums-HER2E	Paired_Lums-HER2E	POS	NEG	POS
AP_149_016-018P-PRIMARY	GEICAM	GEICAM/Spain	GM-PRIM-67	Paired	PRIM	FFPE	Breast	Breast	-0.267611	0.0060024	0.117311	0.217287	-0.0989676	38.7094	49.1841	0.200407	LumB	Lums-HER2E	Paired_Lums-HER2E	POS	POS	POS
AP_150_016-018M-METASTATIC	GEICAM	GEICAM/Spain	GM-MET-67	Paired	MET	FFPE	Pericardium	Rest	-0.244562	0.48024	-0.0660264	0.402737	-0.287971	56.4802	50.9598	0.0695013	Her2	Lums-HER2E	Paired_Lums-HER2E	POS	POS	POS
AP_151_016-021P-PRIMARY	GEICAM	GEICAM/Spain	GM-PRIM-68	Paired	PRIM	FFPE	Breast	Breast	-0.415798	-0.415222	0.776327	-0.358655	0.583866	-5.1519	-11.5729	-0.970259	LumA	Lums-HER2E	Paired_Lums-HER2E	POS	NEG	POS
AP_152_016-021M-METASTATIC	GEICAM	GEICAM/Spain	GM-MET-68	Paired	MET	FFPE	Endometrial	Rest	-0.198271	-0.162161	0.0179112	0.144586	-0.0416327	39.4912	42.3772	0.0467251	LumB	Lums-HER2E	Paired_Lums-HER2E	POS	NEG	POS
AP_153_016-023P-PRIMARY	GEICAM	GEICAM/Spain	GM-PRIM-69	Paired	PRIM	FFPE	Breast	Breast	-0.429916	0.00667467	0.12509	0.339736	-0.356639	39.6404	43.5274	0.0421199	LumB	Lums-HER2E	Paired_Lums-HER2E	POS	NEG	POS
AP_154_016-023M-METASTATIC	GEICAM	GEICAM/Spain	GM-MET-69	Paired	MET	FFPE	Skin	Rest	-0.423097	-0.0709244	0.355198	-0.0516206	0.10569	22.4531	16.2786	-0.504474	LumA	Lums-HER2E	Paired_Lums-HER2E	POS	NEG	POS
AP_155_016-024P-PRIMARY	GEICAM	GEICAM/Spain	GM-PRIM-70	Paired	PRIM	FFPE	Breast	Breast	-0.21114	-0.141801	0.495318	-0.39611	0.502137	10.8946	5.6503	-0.666668	Normal	Normal	Paired_Normal	POS	POS	POS
AP_156_016-024M-METASTATIC	GEICAM	GEICAM/Spain	GM-MET-70	Paired	MET	FFPE	Breast	Breast	0.631789	0.0112845	-0.500504	-0.302089	0.0556543	60.1677	49.302	0.106814	Basal	Normal	Paired_Normal	NEG	POS	NEG
AP_157_016-025P-PRIMARY	GEICAM	GEICAM/Spain	GM-PRIM-71	Paired	PRIM	FFPE	Breast	Breast	-0.264826	-0.261176	0.556879	-0.463721	0.479376	5.19532	-1.19848	-0.787214	LumA	Lums-HER2E	Paired_Lums-HER2E	POS	NEG	POS
AP_158_016-025M-METASTATIC	GEICAM	GEICAM/Spain	GM-MET-71	Paired	MET	FFPE	Bowel	Rest	-0.602017	0.054886	0.371236	0.203649	-0.163217	27.0158	35.8297	-0.0724756	LumA	Lums-HER2E	Paired_Lums-HER2E	POS	NEG	NEG
AP_161_016-029P-PRIMARY	GEICAM	GEICAM/Spain	GM-PRIM-72	Paired	PRIM	FFPE	Breast	Breast	-0.36557	-0.437311	0.783145	-0.399952	0.624586	-6.20029	-9.90078	-0.91568	LumA	Lums-HER2E	Paired_Lums-HER2E	POS	NEG	POS
AP_162_016-029M-METASTATIC	GEICAM	GEICAM/Spain	GM-MET-72	Paired	MET	FFPE	Ovarian	Rest	-0.417431	0.0601681	0.324562	0.192413	0.0145498	29.7545	38.9375	-0.00649206	LumA	Lums-HER2E	Paired_Lums-HER2E	POS	NEG	POS
AP_163_018-004P-PRIMARY	GEICAM	GEICAM/Spain	GM-PRIM-73	Paired	PRIM	FFPE	Breast	Breast	0.683265	0.157743	-0.697383	-0.00321729	-0.163794	75.7297	69.2155	0.478119	Basal	Basal	Paired_Basal	NEG	NEG	NEG
AP_164_018-004M-METASTATIC	GEICAM	GEICAM/Spain	GM-MET-73	Paired	MET	FFPE	Skin	Rest	0.752509	-0.109916	-0.51952	-0.311789	0.15928	59.614	56.9665	0.320456	Basal	Basal	Paired_Basal	NEG	NEG	NEG
AP_165_020-001P-PRIMARY	GEICAM	GEICAM/Spain	GM-PRIM-74	Paired	PRIM	FFPE	Breast	Breast	-0.192989	-0.392269	0.396879	-0.0788956	0.173013	16.6959	26.1235	-0.175228	LumA	Lums-HER2E	Paired_Lums-HER2E	POS	NEG	POS
AP_166_020-001M-METASTATIC	GEICAM	GEICAM/Spain	GM-MET-74	Paired	MET	FFPE	Lymph node	Lymph node	-0.366819	-0.0344298	0.272029	0.197215	-0.128163	30.8757	42.5088	0.0872004	LumA	Lums-HER2E	Paired_Lums-HER2E	POS	NEG	POS
AP_167_020-002P-PRIMARY	GEICAM	GEICAM/Spain	GM-PRIM-75	Paired	PRIM	FFPE	Breast	Breast	0.604514	0.160336	-0.749916	0.0377911	-0.205186	78.241	80.3306	0.735728	Basal	Basal	Paired_Basal	NEG	NEG	NEG
AP_168_020-002M-METASTATIC	GEICAM	GEICAM/Spain	GM-MET-75	Paired	MET	FFPE	Lymph node	Lymph node	0.706411	0.0280912	-0.602497	-0.294118	0.144874	65.145	61.0093	0.367721	Basal	Basal	Paired_Basal	NEG	NEG	NEG
AP_169_020-003P-PRIMARY	GEICAM	GEICAM/Spain	GM-PRIM-76	Paired	PRIM	FFPE	Breast	Breast	-0.61527	-0.0022569	0.552653	0.231789	-0.0885954	19.0622	21.6739	-0.369384	LumA	Lums-HER2E	Paired_Lums-HER2E	POS	NEG	POS
AP_170_020-003M-METASTATIC	GEICAM	GEICAM/Spain	GM-MET-76	Paired	MET	FFPE	Lymph node	Lymph node	-0.219784	0.317935	-0.222089	0.500792	-0.453349	62.3314	63.1654	0.351083	LumB	Lums-HER2E	Paired_Lums-HER2E	POS	NEG	POS
AP_171_020-005P-PRIMARY	GEICAM	GEICAM/Spain	GM-PRIM-77	Paired	PRIM	FFPE	Breast	Breast	-0.450564	0.292005	0.295558	0.211044	-0.151309	34.5046	22.3667	-0.480956	LumA	Lums-HER2E	Paired_Lums-HER2E	POS	POS	POS
AP_172_020-005M-METASTATIC	GEICAM	GEICAM/Spain	GM-MET-77	Paired	MET	FFPE	Skin	Rest	-0.0773589	0.411573	-0.0182953	-0.123842	0.0148379	45.5174	36.4102	-0.191152	Her2	Lums-HER2E	Paired_Lums-HER2E	POS	POS	POS
AP_173_022-002P-PRIMARY	GEICAM	GEICAM/Spain	GM-PRIM-78	Paired	PRIM	FFPE	Breast	Breast	-0.128836	-0.15928	0.19952	-0.0892677	0.248019	28.4387	17.8575	-0.484223	Normal	Normal	Paired_Normal	POS	NEG	POS
AP_174_022-002M-METASTATIC	GEICAM	GEICAM/Spain	GM-MET-78	Paired	MET	FFPE	Lymph node	Lymph node	-0.29988	0.337143	-0.148523	0.494934	-0.47563	59.0689	62.9227	0.362372	LumB	Normal	Paired_Normal	POS	POS	NEG
AP_175_023-002P-PRIMARY	GEICAM	GEICAM/Spain	GM-PRIM-79	Paired	PRIM	FFPE	Breast	Breast	-0.243505	0.544778	-0.200576	0.429628	-0.412149	63.4592	66.3183	0.400218	Her2	Lums-HER2E	Paired_Lums-HER2E	POS	NEG	NEG
AP_176_023-002M-METASTATIC	GEICAM	GEICAM/Spain	GM-MET-79	Paired	MET	FFPE	Skin	Rest	-0.206435	0.526531	-0.172053	0.441441	-0.416759	62.3903	69.4295	0.488468	Her2	Lums-HER2E	Paired_Lums-HER2E	POS	NEG	POS
AP_177_023-006P-PRIMARY	GEICAM	GEICAM/Spain	GM-PRIM-80	Paired	PRIM	FFPE	Breast	Breast	-0.203842	0.285282	-0.0241537	0.205762	-0.243986	48.793	41.1256	-0.0969651	Her2	Normal	Paired_Normal	POS	POS	POS
AP_178_023-006M-METASTATIC	GEICAM	GEICAM/Spain	GM-MET-80	Paired	MET	FFPE	Skin	Rest	-0.139592	-0.0816807	0.43904	-0.48072	0.47928	13.0489	2.79682	-0.753901	Normal	Normal	Paired_Normal	POS	POS	NEG
AP_179_023-007P-PRIMARY	GEICAM	GEICAM/Spain	GM-PRIM-81	Paired	PRIM	FFPE	Breast	Breast	-0.37018	-0.191261	0.398127	0.049988	0.108764	20.8698	23.972	-0.289286	LumA	Lums-HER2E	Paired_Lums-HER2E	POS	NEG	POS
AP_180_023-007M-METASTATIC	GEICAM	GEICAM/Spain	GM-MET-81	Paired	MET	FFPE	Lymph node	Lymph node	-0.33503	0.37479	0.139016	0.268956	-0.239472	43.7487	48.5729	0.108022	Her2	Lums-HER2E	Paired_Lums-HER2E	POS	NEG	NEG
AP_181_024-001P-PRIMARY	GEICAM	GEICAM/Spain	GM-PRIM-82	Paired	PRIM	FFPE	Breast	Breast	-0.427323	0.000912365	0.205858	0.302377	-0.271164	35.5959	31.6104	-0.227781	LumB	Lums-HER2E	Paired_Lums-HER2E	POS	NEG	POS
AP_182_024-001M-METASTATIC	GEICAM	GEICAM/Spain	GM-MET-82	Paired	MET	FFPE	Skin	Rest	-0.444514	0.116351	0.0890756	0.340504	-0.307371	42.6825	44.3907	0.0310928	LumB	Lums-HER2E	Paired_Lums-HER2E	POS	NEG	POS
AP_183_036-001P-PRIMARY	GEICAM	GEICAM/Spain	GM-PRIM-83	Paired	PRIM	FFPE	Breast	Breast	-0.425594	-0.449412	0.756927	-0.306891	0.408595	-4.0321	-3.18067	-0.765565	LumA	Lums-HER2E	Paired_Lums-HER2E	POS	NEG	POS
AP_184_036-001M-METASTATIC	GEICAM	GEICAM/Spain	GM-MET-83	Paired	MET	FFPE	Skin	Rest	-0.149676	-0.220552	0.477935	-0.535846	0.401681	8.42797	8.39591	-0.565966	LumA	Lums-HER2E	Paired_Lums-HER2E	POS	NEG	POS
AP_185_036-003P-PRIMARY	GEICAM	GEICAM/Spain	GM-PRIM-84	Paired	PRIM	FFPE	Breast	Breast	-0.197311	0.227563	-0.221897	0.265114	-0.377863	57.1683	63.2701	0.406669	LumB	Lums-HER2E	Paired_Lums-HER2E	POS	NEG	POS
AP_186_036-003M-METASTATIC	GEICAM	GEICAM/Spain	GM-MET-84	Paired	MET	FFPE	Ovarian	Rest	-0.403025	0.258679	0.00811525	0.419352	-0.306603	49.6501	59.6489	0.350979	LumB	Lums-HER2E	Paired_Lums-HER2E	POS	NEG	POS
AP_187_036-005P-PRIMARY	GEICAM	GEICAM/Spain	GM-PRIM-85	Paired	PRIM	FFPE	Breast	Breast	-0.377959	0.0720768	0.225642	0.144202	-0.219208	33.4191	44.2421	0.103602	LumA	Lums-HER2E	Paired_Lums-HER2E	POS	NEG	POS
AP_188_036-005M-METASTATIC	GEICAM	GEICAM/Spain	GM-MET-85	Paired	MET	FFPE	Liver	Liver	0.125762	0.468908	-0.545258	0.31054	-0.436351	76.4725	72.6538	0.496309	Her2	Lums-HER2E	Paired_Lums-HER2E	NEG	NEG	NEG
AP_189_036-009P-PRIMARY	GEICAM	GEICAM/Spain	GM-PRIM-86	Paired	PRIM	FFPE	Breast	Breast	0.316399	-0.0462425	-0.0809124	-0.518079	0.344442	36.7564	34.8106	-0.096736	Normal	Normal	Paired_Normal	NEG	POS	NEG
AP_190_036-009M-METASTATIC	GEICAM	GEICAM/Spain	GM-MET-86	Paired	MET	FFPE	Skin	Rest	0.217383	0.217479	-0.222953	-0.283553	0.118944	49.9437	43.3174	-0.0114532	Her2	Normal	Paired_Normal	NEG	POS	NEG
AP_191_042-002P-PRIMARY	GEICAM	GEICAM/Spain	GM-PRIM-87	Paired	PRIM	FFPE	Breast	Breast	-0.479952	-0.191453	0.595102	-0.0627611	0.293541	10.2726	18.1871	-0.363002	LumA	Lums-HER2E	Paired_Lums-HER2E	POS	NEG	POS
AP_192_042-002M-METASTATIC	GEICAM	GEICAM/Spain	GM-MET-87	Paired	MET	FFPE	Peritoneum	Rest	-0.354142	0.252437	0.1903	0.173301	-0.142857	38.1341	44.101	0.0490632	Her2	Lums-HER2E	Paired_Lums-HER2E	POS	NEG	POS
AP_193_045-003P-PRIMARY	GEICAM	GEICAM/Spain	GM-PRIM-88	Paired	PRIM	FFPE	Breast	Breast	0.241297	0.33551	-0.324754	-0.156303	-0.0317407	58.1412	43.4663	-0.0789512	Her2	Lums-HER2E	Paired_Lums-HER2E	POS	NEG	POS
AP_194_045-003M-METASTATIC	GEICAM	GEICAM/Spain	GM-MET-88	Paired	MET	FFPE	Lymph node	Lymph node	0.281441	0.115294	-0.302665	-0.160144	0.123169	54.1302	53.538	0.225863	Basal	Lums-HER2E	Paired_Lums-HER2E	NEG	NEG	NEG
AP_195_045-004P-PRIMARY	GEICAM	GEICAM/Spain	GM-PRIM-89	Paired	PRIM	FFPE	Breast	Breast	-0.645714	0.141513	0.344922	0.323601	-0.235054	31.1665	34.3056	-0.153464	LumA	Lums-HER2E	Paired_Lums-HER2E	POS	NEG	POS
AP_196_045-004M-METASTATIC	GEICAM	GEICAM/Spain	GM-MET-89	Paired	MET	FFPE	Liver	Liver	-0.1903	0.31102	-0.199808	0.409748	-0.385258	59.93	66.1845	0.447922	LumB	Lums-HER2E	Paired_Lums-HER2E	POS	NEG	NEG
AP_197_047-001P-PRIMARY	GEICAM	GEICAM/Spain	GM-PRIM-90	Paired	PRIM	FFPE	Breast	Breast	-0.251957	-0.00590636	0.318127	-0.359616	0.389676	20.641	17.23	-0.458931	Normal	Normal	Paired_Normal	POS	POS	POS
AP_198_047-001M-METASTATIC	GEICAM	GEICAM/Spain	GM-MET-90	Paired	MET	FFPE	Skin	Rest	-0.689412	0.265018	0.440096	0.237839	-0.0765906	27.3822	34.6497	-0.130949	LumA	Normal	Paired_Normal	POS	POS	POS
AP_219_067-005P-PRIMARY	GEICAM	GEICAM/Spain	GM-PRIM-91	Paired	PRIM	FFPE	Breast	Breast	-0.0796639	0.59539	-0.243505	0.204706	-0.345882	63.0316	53.2705	0.0834094	Her2	Lums-HER2E	Paired_Lums-HER2E	NEG	POS	NEG
AP_220_067-005M-METASTATIC	GEICAM	GEICAM/Spain	GM-MET-91	Paired	MET	FFPE	Skin	Rest	-0.0364466	0.616327	-0.318127	0.211909	-0.382473	66.7666	56.6528	0.142151	Her2	Lums-HER2E	Paired_Lums-HER2E	POS	POS	NEG
AP_37_08-7581-A7-PRIMARY	GEICAM	GEICAM/Spain	GM-PRIM-92	Paired	PRIM	FFPE	Breast	Breast	-0.153229	-0.461224	0.65599	-0.548235	0.760672	-2.70776	-14.1284	-1.03049	Normal	Normal	Paired_Normal	NEG	POS	NEG
AP_38_08-7578-A1-METASTASIS	GEICAM	GEICAM/Spain	GM-MET-92	Paired	MET	FFPE	Lymph node	Lymph node	0.287875	0.318992	-0.385642	-0.0933974	-0.0897479	61.7055	56.2475	0.219204	Her2	Normal	Paired_Normal	NEG	POS	NEG
AP_69_MX259P-PRIMARY	GEICAM	GEICAM/Spain	GM-PRIM-93	Paired	PRIM	FFPE	Breast	Breast	-0.132389	0.266843	-0.20096	0.364514	-0.422041	58.8603	61.6183	0.348731	LumB	Lums-HER2E	Paired_Lums-HER2E	POS	NEG	POS
AP_70_MX259M-METASTATIC	GEICAM	GEICAM/Spain	GM-MET-93	Paired	MET	FFPE	Bone	Rest	-0.190012	0.165042	-0.0512365	0.271357	-0.239664	49.3174	56.5851	0.298673	LumB	Lums-HER2E	Paired_Lums-HER2E	POS	NEG	POS
AP_71_MX267P-PRIMARY	GEICAM	GEICAM/Spain	GM-PRIM-94	Paired	PRIM	FFPE	Breast	Breast	-0.380456	-0.190396	0.514142	-0.125282	0.312845	13.0915	14.4252	-0.471048	LumA	Lums-HER2E	Paired_Lums-HER2E	POS	NEG	POS
AP_72_MX267M-METASTATIC	GEICAM	GEICAM/Spain	GM-MET-94	Paired	MET	FFPE	Liver	Liver	-0.154862	0.121056	-0.17407	0.319088	-0.21892	54.7364	61.081	0.379173	LumB	Lums-HER2E	Paired_Lums-HER2E	POS	NEG	POS
AP_75_MX278P-PRIMARY	GEICAM	GEICAM/Spain	GM-PRIM-96	Paired	PRIM	FFPE	Breast	Breast	-0.510012	0.254838	0.185018	0.273661	-0.187707	39.2944	46.207	0.0849103	LumB	Lums-HER2E	Paired_Lums-HER2E	POS	NEG	POS
AP_76_MX278M-METASTATIC	GEICAM	GEICAM/Spain	GM-MET-96	Paired	MET	FFPE	Skin	Rest	-0.172341	0.217095	-0.0282833	0.00417767	-0.0505642	44.7493	49.3098	0.150796	Her2	Lums-HER2E	Paired_Lums-HER2E	POS	NEG	POS
AP_77_MX291P-PRIMARY	GEICAM	GEICAM/Spain	GM-PRIM-97	Paired	PRIM	FFPE	Breast	Breast	-0.275198	-0.50934	0.716687	-0.374598	0.598271	-3.6302	0.962875	-0.650292	LumA	Lums-HER2E	Paired_Lums-HER2E	POS	NEG	POS
AP_78_MX291M-METASTATIC	GEICAM	GEICAM/Spain	GM-MET-97	Paired	MET	FFPE	Liver	Liver	0.10012	0.307947	-0.34569	0.276447	-0.232365	65.1417	71.4105	0.559001	Her2	Lums-HER2E	Paired_Lums-HER2E	POS	NEG	POS
AP_79_MX334P-PRIMARY	GEICAM	GEICAM/Spain	GM-PRIM-98	Paired	PRIM	FFPE	Breast	Breast	-0.321297	-0.482449	0.737527	-0.448739	0.632557	-5.56779	-5.34003	-0.797517	LumA	Lums-HER2E	Paired_Lums-HER2E	POS	NEG	POS
AP_80_MX334M-METASTATIC	GEICAM	GEICAM/Spain	GM-MET-98	Paired	MET	FFPE	Bone	Rest	-0.452773	-0.358463	0.623337	-0.0627611	0.242065	6.78719	6.12638	-0.623679	LumA	Lums-HER2E	Paired_Lums-HER2E	POS	NEG	POS
AP_83_MX340P-PRIMARY	GEICAM	GEICAM/Spain	GM-PRIM-100	Paired	PRIM	FFPE	Breast	Breast	-0.550828	0.0545978	0.329556	0.196351	-0.025114	28.8709	37.0699	-0.0517847	LumA	Lums-HER2E	Paired_Lums-HER2E	POS	NEG	POS
AP_84_MX340M-METASTATIC	GEICAM	GEICAM/Spain	GM-MET-100	Paired	MET	FFPE	Bone	Rest	-0.37066	-0.257047	0.496471	-0.110972	0.271453	13.1343	18.3289	-0.366422	LumA	Lums-HER2E	Paired_Lums-HER2E	POS	NEG	NEG
AP_203_047-007P-PRIMARY	GEICAM	GEICAM/Spain	GM-PRIM-102	Paired	PRIM	FFPE	Breast	Breast	0.120864	-0.276351	0.0617047	-0.39976	0.196447	28.4794	31.5958	-0.108099	Normal	Normal	Paired_Normal	POS	NEG	POS
AP_204_047-007M-METASTATIC	GEICAM	GEICAM/Spain	GM-MET-102	Paired	MET	FFPE	Skin	Rest	-0.0305882	-0.169076	0.0593998	-0.257815	0.184634	31.7717	35.8913	-0.0439344	Normal	Normal	Paired_Normal	POS	NEG	POS
AP_205_048-002P-PRIMARY	GEICAM	GEICAM/Spain	GM-PRIM-103	Paired	PRIM	FFPE	Breast	Breast	0.0818727	0.356543	-0.217959	-0.106074	-0.114238	54.0729	42.3196	-0.0897892	Her2	Lums-HER2E	Paired_Lums-HER2E	NEG	POS	POS
AP_206_048-002M-METASTATIC	GEICAM	GEICAM/Spain	GM-MET-103	Paired	MET	FFPE	Lymph node	Lymph node	0.032413	0.393806	-0.236014	0.0407683	-0.144778	57.5783	54.3482	0.178009	Her2	Lums-HER2E	Paired_Lums-HER2E	NEG	POS	POS
AP_209_066-003P-PRIMARY	GEICAM	GEICAM/Spain	GM-PRIM-104	Paired	PRIM	FFPE	Breast	Breast	-0.0544058	0.584538	-0.208259	0.133253	-0.242929	60.3417	45.5474	-0.087903	Her2	Lums-HER2E	Paired_Lums-HER2E	NEG	NEG	NEG
AP_210_066-003M-METASTATIC	GEICAM	GEICAM/Spain	GM-MET-104	Paired	MET	FFPE	Lymph node	Lymph node	-0.0687155	0.687971	-0.252821	0.227563	-0.392365	65.2121	53.9296	0.0751054	Her2	Lums-HER2E	Paired_Lums-HER2E	NEG	POS	NEG
AP_215_067-003P-PRIMARY	GEICAM	GEICAM/Spain	GM-PRIM-105	Paired	PRIM	FFPE	Breast	Breast	-0.37431	0.53575	0.0461465	0.311116	-0.387371	50.4697	51.0384	0.104653	Her2	Lums-HER2E	Paired_Lums-HER2E	POS	POS	NEG
AP_216_067-003M-METASTATIC	GEICAM	GEICAM/Spain	GM-MET-105	Paired	MET	FFPE	Brain	Brain	-0.128739	0.409172	-0.199808	0.23102	-0.307851	58.6859	54.5226	0.161244	Her2	Lums-HER2E	Paired_Lums-HER2E	POS	POS	POS
AP_217_067-004P-PRIMARY	GEICAM	GEICAM/Spain	GM-PRIM-106	Paired	PRIM	FFPE	Breast	Breast	0.0177191	0.489556	-0.261945	0.176471	-0.291621	62.254	53.6741	0.11439	Her2	Lums-HER2E	Paired_Lums-HER2E	NEG	POS	NEG
AP_218_067-004M-METASTATIC	GEICAM	GEICAM/Spain	GM-MET-106	Paired	MET	FFPE	Skin	Rest	0.224298	0.203842	-0.179928	-0.251188	0.163697	48.5356	41.9017	-0.0368177	Basal	Lums-HER2E	Paired_Lums-HER2E	NEG	POS	NEG
AP_221_067-006P-PRIMARY	GEICAM	GEICAM/Spain	GM-PRIM-107	Paired	PRIM	FFPE	Breast	Breast	-0.396783	-0.101176	0.336663	0.25503	-0.158319	28.0358	22.7388	-0.385915	LumA	Lums-HER2E	Paired_Lums-HER2E	POS	NEG	POS
AP_222_067-006M-METASTATIC	GEICAM	GEICAM/Spain	GM-MET-107	Paired	MET	FFPE	Skin	Rest	-0.545162	-0.181273	0.508764	0.173974	0.0239616	17.6365	19.9258	-0.380384	LumA	Lums-HER2E	Paired_Lums-HER2E	POS	NEG	POS
AP_233_074-014P-PRIMARY	GEICAM	GEICAM/Spain	GM-PRIM-108	Paired	PRIM	FFPE	Breast	Breast	-0.597791	-0.0858103	0.502137	0.204322	-0.0884994	19.5581	21.6552	-0.362914	LumA	Lums-HER2E	Paired_Lums-HER2E	POS	NEG	POS
AP_234_074-014M-METASTATIC	GEICAM	GEICAM/Spain	GM-MET-108	Paired	MET	FFPE	Bone	Rest	-0.13527	-0.0463385	-0.0619928	0.173205	-0.237455	45.2929	53.0795	0.265314	LumB	Lums-HER2E	Paired_Lums-HER2E	POS	NEG	POS
AP_235_074-017P-PRIMARY	GEICAM	GEICAM/Spain	GM-PRIM-109	Paired	PRIM	FFPE	Breast	Breast	-0.141705	-0.445954	0.599424	-0.57042	0.681921	-0.452783	-9.31106	-0.925279	Normal	Normal	Paired_Normal	POS	NEG	NEG
AP_236_074-017M-METASTATIC	GEICAM	GEICAM/Spain	GM-MET-109	Paired	MET	FFPE	Ovarian	Rest	-0.232461	-0.168115	0.377671	-0.189052	0.242449	18.7423	28.6724	-0.146515	LumA	Normal	Paired_Normal	POS	NEG	NEG
AP_237_074-018P-PRIMARY	GEICAM	GEICAM/Spain	GM-PRIM-110	Paired	PRIM	FFPE	Breast	Breast	0.314958	-0.012437	-0.102137	-0.491669	0.34012	38.5666	32.7083	-0.16626	Normal	Normal	Paired_Normal	NEG	POS	NEG
AP_238_074-018M-METASTATIC	GEICAM	GEICAM/Spain	GM-MET-110	Paired	MET	FFPE	Lymph node	Lymph node	0.0495078	0.524994	-0.312941	0.14401	-0.351741	64.5024	59.1275	0.234561	Her2	Normal	Paired_Normal	POS	POS	NEG
AP_241_082-001P-PRIMARY	GEICAM	GEICAM/Spain	GM-PRIM-111	Paired	PRIM	FFPE	Breast	Breast	-0.497815	-0.130276	0.391405	0.206146	-0.0691957	24.0219	31.339	-0.141778	LumA	Lums-HER2E	Paired_Lums-HER2E	POS	NEG	POS
AP_242_082-001M-METASTATIC	GEICAM	GEICAM/Spain	GM-MET-111	Paired	MET	FFPE	Skin	Rest	-0.314766	0.0582473	0.28096	0.155246	-0.0352941	31.4208	23.9959	-0.387837	LumA	Lums-HER2E	Paired_Lums-HER2E	POS	NEG	POS
AP_243_082-002P-PRIMARY	GEICAM	GEICAM/Spain	GM-PRIM-112	Paired	PRIM	FFPE	Breast	Breast	0.745402	-0.191453	-0.446819	-0.43443	0.281537	53.3185	45.1525	0.0787765	Basal	Basal	Paired_Basal	NEG	NEG	NEG
AP_244_082-002M-METASTATIC	GEICAM	GEICAM/Spain	GM-MET-112	Paired	MET	FFPE	Skin	Rest	0.797071	-0.15102	-0.547947	-0.322833	0.21988	60.2256	61.6332	0.439786	Basal	Basal	Paired_Basal	NEG	NEG	NEG
AP_245_100-003P-PRIMARY	GEICAM	GEICAM/Spain	GM-PRIM-113	Paired	PRIM	FFPE	Breast	Breast	-0.323505	-0.27587	0.477455	0.044994	0.200384	16.488	8.91226	-0.626976	LumA	Lums-HER2E	Paired_Lums-HER2E	POS	NEG	POS
AP_246_100-003M-METASTATIC	GEICAM	GEICAM/Spain	GM-MET-113	Paired	MET	FFPE	Skin	Rest	-0.215654	-0.604034	0.649268	-0.356447	0.540168	-1.62586	-5.04305	-0.803168	LumA	Lums-HER2E	Paired_Lums-HER2E	POS	NEG	POS
