# Supplementary material for: Multiplatform Analysis of Primary and Metastatic Breast Tumors from the AURORA US Network identifies microenvironment and epigenetics drivers of metastasis
Source: Research Square preprint supplement (doi:10.21203/rs.3.rs-1221704/v1), 2022-01-11
Supplement: Supplementary file 5 [file 49a373ff2071a638b706cd74.xlsx]

## Sheet: Clinicopathological charact.
Table 1. Clinicopathological characteristics of study population
CHARACTERISTIC		TOTAL N=55
		N	%
Age at initial diagnosis (years)	Median (range), Mean	49 (25-76), 51.5
Race	White	37	67.3
	Black/African American	10	18.2
	Asian	1	1.8
	Other	2	3.6
	Unknown	5	9.1
Ethnicity	Not Hispanic-not Latina	40	72.7
	Hispanic/Latina	4	7.3
	Unknown	11	20
Germline BRCA1/BRCA2 mutation	Yes	4	7.3
	No*	51	92.7
Histologic subtype of primary tumor	Invasive Ductal Carcinoma (IDC)	44	80
	Invasive Lobular Carcinoma (ILC)	4	7.3
	Mixed IDC/ILC	3	5.5
	Invasive Micropapillary Carcinoma	1	1.8
	Metaplastic	1	1.8
	Unknown	2	3.6
Anatomic clinical stage at initial diagnosis (TNM 7th Edition)	Stage I	10	18.2
	Stage II	24	43.6
	Stage III	7	12.7
	Stage IV	6	10.9
	Unknown**	8	14.5
Clinical receptor subtype at initial diagnosis (primary)	HR+/HER2-	17	30.9
	HR-/HER2-	19	34.5
	HR+/HER2+	6	10.9
	HR-/HER2+	4	7.3
	Unknown***	9	16.4
Neo-/adjuvant systemic therapy for localized breast cancer (N=49)	Neoadjuvant	19	38.8
	Adjuvant	42	85.7
	No neoadjuvant or adjuvant	3	6.1
N treatments for metastatic disease	Median (range), Average	3 (0-20), 4.1
Type of 1st-line treatment for metastatic disease	Chemotherapy only	23	41.8
	Chemotherapy + HER2/other targeted	12	21.8
	HER2-targeted therapy only	1	1.8
	Endocrine therapy	15	27.3
	None/Unknown	4	7.3
N patients per genomic platform	DNA sequencing	49	89.1
(≥ 1 sample analyzed)****	RNA sequencing	53	96.4
	Methylation	52	94.5
Collection of metastatic samples	Non-autopsy	35	63.6
	Autopsy	20	36.4
* One patient with germline PALB2 mutation; one patient with germline CHEK2 mutation.
** Of 8 patients with unknown clinical stage at initial diagnosis, pathologic stage was as follows: II (n=4), III (n=3), unknown (UK, n=1).
***Receptor status at initial breast cancer diagnosis: HR+/HER2 UK (n=6), HR-/HER2 UK (n=1), HR UK/HER2- (n=1), HR UK/HER2 UK (n=1).
****Patients included in all 3 genomic platforms: n=45.

## Sheet: Site of metastasis
Table 2. Site of metastatic samples tested*
Site(s) of metastasis	N	%
Liver	28	27.5
Lung	13	12.7
Lymph node	12	11.8
Brain	11	10.8
Chest	8	7.8
Soft tissue	4	3.9
Adrenal	3	2.9
Bone	3	2.9
Ovary	3	2.9
Pleura	3	2.9
Diaphragm	2	2
Peritoneum	2	2
Skin	2	2
Kidney	1	1
Pancreas	1	1
Pericardium	1	1
Rectum	1	1
Spleen	1	1
Stomach	1	1
Thyroid	1	1
Uterus	1	1
Total	102	100
*More than one sample from a given anatomic site may have been collected per patient.
