# Supplementary material for: Multiplatform Analysis of Primary and Metastatic Breast Tumors from the AURORA US Network identifies microenvironment and epigenetics drivers of metastasis
Source: Research Square preprint supplement (doi:10.21203/rs.3.rs-1221704/v1), 2022-01-11
Supplement: Supplementary file 6 [file 65c03c6a831990650cd17a24.xlsx]

## Sheet: LIST OF 747 MODULES
	Name	Method	PMID
1	GSEA_BIOCARTA_AKT_PATHWAY	Median Expression	GSEA	842	8517	4303	1147	2308	2309	5970	5170	2690	3551	207	5290	2688	5515	356	3320	7533	572	4790	5294	5295	4792
2	GSEA_BIOCARTA_ALK_PATHWAY	Median Expression	GSEA	4208	7471	4879	4878	9241	2932	2626	1499	7042	8646	6927	4633	7040	8321	1386	4090	7049	7048	7046	1482	7043	4091	659	657	90	5981	652	324	650	6885	655	1855	653	27302	8312	4089	4086
3	GSEA_BIOCARTA_BRCA_ATR_PATHWAY_ATRBRCA	Median Expression	GSEA	11200	11277	675	4361	5884	4683	672	5883	2178	1111	2189	7157	3364	5810	545	472	5888	2188	10111	2176	2177
4	GSEA_BIOCARTA_CTLA4_PATHWAY	Median Expression	GSEA	5781	941	942	940	915	916	917	3702	5290	23308	6957	6955	2885	919	29851	5295	3932	3123	3122	1493	3558
5	GSEA_BIOCARTA_PTEN_PATHWAY	Median Expression	GSEA	5747	5728	5164	6464	2309	5170	9564	1027	3611	207	5290	3688	356	2885	5595	5295	6654	5594
6	GSEA_BIOCARTA_RAS_PATHWAY	Median Expression	GSEA	842	3265	4303	1147	5898	5894	598	2002	5970	5604	10928	5900	207	5290	387	5337	5595	572	4790	5294	5879	5295	998
7	GSEA_BIOCARTA_RB_PATHWAY	Median Expression	GSEA	4661	1432	1111	1017	1019	7465	5925	7157	983	994	995	472	7533
8	GSEA_BIOCARTA_VEGF_PATHWAY	Median Expression	GSEA	3265	5579	6464	10209	5578	7422	8890	1994	8892	8891	8894	8893	5829	5747	4846	1967	1968	2321	3091	7428	3791	1965	1964	2324	5290	405	5335	5294	5295
9	GSEA_CASPASE_CASCADE_APOPTOSIS_SA	Median Expression	GSEA	842	330	6720	5551	3002	1677	840	836	331	142	355	22937	329	841	356	1676	843	317	6721
10	GSEA_GP1_Proliferation_DNA_repair.r=0.972_REACTOME_CELL_CYCLE_MITOTIC	Median Expression	GSEA	10112	10121	10142	1017	1019	1021	10213	1022	1026	1027	10274	1029	1030	1031	1032	10382	10383	10393	10403	10426	10540	1058	1060	1069	10714	10726	10733	10735	10806	10844	10926	11004	11064	11065	11116	11130	11190	11243	11258	114791	1163	121441	132660	143471	1453	1454
11	GSEA_GP1_Proliferation_DNA_repair.r=0.981_PUJANA_CHEK2_PCC_NETWORK	Median Expression	GSEA	7465	2547	3662	472	3068	2968	27309	80143	990	5795	2091	9112	1353	3099	6599	5198	3735	5889	23019	6776	11065	9	143244	471	10024	6602	23306	2334	9521	22974	114908	30836	7023	7520	1058	22999	1660	10196	10899	10898	7037	4507	7027	23636	3015	5511
12	GSEA_GP10_Fatty_acid_oxidation.r=0.930_CARBOXYLIC_ACID_METABOLIC_PROCESS	Median Expression	GSEA	10840	5742	23428	11136	2678	6545	189	8140	3620	9057	8424	9056	2731	2184	2806	443	2805	5351	51540	4143	23564	23576	140838	4329	8565	1615	2628	55790	16	5860	23659	2687	1036	10455	10891	54938	5831	50640	4864	247	5917	54677	4199	26061	36	10873
13	GSEA_GP12_Hypoxia_glycolosis.r=0.939_SEMENZA_HIF1_TARGETS	Median Expression	GSEA	3162	2056	2321	7043	3481	6513	2597	664	1026	226	768	147	230	4843	133	3098	2023	50808	1906	7422	7167	3484	5211	3099	1356	7037	3939	3486	5054	6515	5315	10370	3485	5230	7018	8974
14	GSEA_GP13_Neural_signailng.r=0.894_NERVOUS_SYSTEM_DEVELOPMENT	Median Expression	GSEA	4208	57679	9615	686	5528	3897	29116	51564	6457	8929	57787	7070	9600	8448	5176	2290	171017	51399	5376	6456	6455	4669	728492	5538	8820	1822	3730	127343	1857	4336	4908	10858	5274	54510	6474	10586	57142	2250	9148	6252	8220	11341	56923	4137	2247	2316
15	GSEA_GP13_Neural_signailng.r=0.959_MODULE_100	Median Expression	GSEA	23345	23194	8543	2719	7102	4192	57509	216	1809	275	2628	2944	713	3485	358	6515	1113	23089	5168	4638	3679	8910	3708	7301	6414	5156	5187	1292	151987	501	1645	10278	55970	3655	4629	8406	7058	51035	2697	8490	2878	6422	1026	83604	10912	2260
16	GSEA_GP14_Plasma_membrane_cell_cell_signaling.r=0.925_MORF_CNTN1	Median Expression	GSEA	283761	7516	1944	9721	9088	1267	5589	27350	7040	4850	3508	80317	27069	9939	11143	23351	7275	11165	6257	6901	23550	4998	4245	9600	158	4598	6843	2740	49	51343	9719	5208	222642	8515	23307	156	22853	9742	51763	8703	5780	63036	2859	2962	8517	3681
17	GSEA_GP15_EGF_signailng.r=0.936_NAGASHIMA_EGF_SIGNALING_UP	Median Expression	GSEA	4609	1839	10221	25976	150094	3725	7538	2150	2353	4982	3976	1960	65124	1969	8061	23429	3399	23135	1316	1958	4929	22822	3280	1490	4665	3397	2114	374	4739	51330	1961	23237	8013	84981	25948	8915	3491	3164	200734	3337	1746	23764	1906	3726	467	8553
18	GSEA_GP16_Protein_kinase_signailng_MAPKs.r=0.885_REGULATION_OF_KINASE_ACTIVITY	Median Expression	GSEA	57679	51776	1907	28984	9966	9088	51562	10333	6885	9064	4217	4216	1029	1030	9077	29969	1031	1032	4293	6997	200734	1139	161742	2785	9294	1956	29882	28988	23560	728	5934	8567	5291	84451	5933	9463	7070	51196	11183	9607	7186	10454	8851	8941	136	51495
19	GSEA_GP16_Protein_kinase_signailng_MAPKs.r=0.893_INTRACELLULAR_SIGNALING_CASCADE	Median Expression	GSEA	57679	6139	9862	695	6885	9064	185	3351	4217	4216	4157	9077	1241	4293	9874	2785	11011	3352	23564	5609	890	23576	3355	3354	8754	23043	6093	6239	5291	84451	9968	9282	9969	4139	10017	2011	5810	6754	6755	55423	6752	6753	6751	3456	10025	9440
20	GSEA_GP17_Basal_signaling.r=0.958_SMID_BREAST_CANCER_BASAL_UP	Median Expression	GSEA	25984	54145	8140	2006	5317	60509	2049	1780	4507	2196	8581	10855	3070	4173	55506	1404	55165	4982	5784	5321	8028	6362	81620	1830	28965	10280	3887	1381	3934	26577	7804	10962	4237	54800	7850	8531	3889	3854	56603	4781	993	65987	2348	1515	79791	2762
21	GSEA_GP18_Vesicle_EPR_membrane_coat.r=0.877_MEMBRANE_COAT	Median Expression	GSEA	1956	1314	54812	8906	1175	22818	1176	26119	9276	1174	26958	1315	372	55707	22820	11276	11316
22	GSEA_GP2_Immune_Tcell_Bcell.r=0.964_KEGG_HEMATOPOIETIC_CELL_LINEAGE	Median Expression	GSEA	2811	2812	2056	3581	945	7124	2815	3684	947	948	2814	3676	3675	4254	3674	2209	3678	2208	2993	7066	7850	3575	4311	3590	930	931	7037	933	3815	2322	3690	2323	3552	1380	929	1378	7173	2057	3589	1437	3126	920	1436	3127	1435	3125
23	GSEA_GP20_TAL1_Leukemia_erythropoiesis.r=0.935_GNF2_TAL1	Median Expression	GSEA	2994	2995	210	2996	2993	10098	6622	7001	8991	5498	10422	2623	212	286	66008	26502	9086	51327	6583	847	6521	3005	9562	23762	2235	11163	4354	3386	3145	1193	114625	27102	6006	1510	55589	760	759	7389	119	6710	51218	3792	5886	222642	3068	7504
24	GSEA_GP21_Anti_apoptosis_DNA_stability.r=0.877_MORF_BCL2	Median Expression	GSEA	109	6861	8425	7402	362	364	8834	3801	3351	1663	8540	11103	23237	1409	916	5291	3360	2155	26048	6755	1395	4487	8292	3363	4158	267	8851	230	4650	9263	3779	116	2048	8629	25830	15	8658	91775	4295	2232	22976	284403	26034	10322	1339	28
25	GSEA_GP21_Anti_apoptosis_DNA_stability.r=0.898_MORF_STK17A	Median Expression	GSEA	5817	109	27302	4902	6276	6861	8425	1565	9896	2901	362	3596	6199	364	8834	182	2342	3351	80317	6513	5566	84148	6508	3892	26011	9522	11103	9640	9223	916	9197	440867	5291	3360	6496	6258	90586	1571	25771	26048	1394	6755	4487	8292	3363	3233
26	GSEA_GP21_Anti_apoptosis_DNA_stability.r=0.925_MORF_MT4	Median Expression	GSEA	22872	686	8425	7402	362	8834	364	3191	3801	27097	1663	8540	6433	27257	11103	23237	6093	1409	5291	3360	2155	25777	26048	6767	6755	1395	10978	4487	9857	8292	5981	3363	4158	91754	4034	267	119	8941	230	4580	783	4650	9263	8629	2483	15
27	GSEA_GP3_Tumor_suppressing_miRNA_targets.r=0.940_GTTTGTT.MIR_495	Median Expression	GSEA	348093	1783	6801	6096	7355	5613	60509	6745	5616	491	627	26122	6430	112476	55187	80127	3192	8473	2309	79365	10735	64682	84858	259230	4140	390	4247	64858	10472	5597	122830	3725	9705	147339	5727	1605	3759	140730	9761	2048	9355	10972	577	55534	3188	3187
28	GSEA_GP3_Tumor_suppressing_miRNA_targets.r=0.940_TGCTTTG.MIR_330	Median Expression	GSEA	4208	55167	6861	10611	1944	7798	9066	5592	223082	490	64746	491	186	54769	8301	25942	284058	2904	66008	84152	25928	3192	8473	5607	2894	56160	56899	1948	94160	6426	51496	56978	390	5594	122830	8028	9873	26060	120	6456	1605	114815	142685	9761	9644	9859
29	GSEA_GP3_Tumor_suppressing_miRNA_targets.r=0.952_DACOSTA_UV_RESPONSE_VIA_ERCC3_DN	Median Expression	GSEA	22920	3475	8732	25820	81550	7049	657	4802	7994	2317	116984	2250	23008	4891	23077	7158	136	23506	23201	9821	10443	7474	4067	9493	51232	9759	5055	10042	7050	9736	100288583	9678	1875	8805	25816	94134	2048	10006	4289	8613	8650	701	9962	55183	10667	9847
30	GSEA_GP6_Squamous_differentiation_development.r=0.902_RICKMAN_TUMOR_DIFFERENTIATED_WELL_VS_POORLY_DN	Median Expression	GSEA	112399	7430	25921	801	100506714	5130	5756	80045	10509	8569	10890	84617	4644	5650	79650	257364	1839	8038	8609	25923	1827	9683	64768	27111	29985	9545	154761	80328	54978	3489	10053	81555	1318	79755	771	9454	29982	7171	84985	51734	11202	23307	147700	84752	837	23299
31	GSEA_GP7_Estrogen_signaling.r=0.97_SMID_BREAST_CANCER_BASAL_DN	Median Expression	GSEA	5076	10234	54502	5274	25800	55191	4239	400451	9677	9497	56848	576	2701	2166	55686	10753	150	5914	23171	6505	7358	54854	10451	6448	56654	11019	4477	9452	9498	9620	9231	79603	2206	9214	7357	1471	10788	477	10129	1384	9028	7704	429	54490	9619	4680
32	GSEA_GP8_FOXO_stemness.r=0.875_MORF_PTPRB	Median Expression	GSEA	5817	8302	6276	5526	3239	364	6096	10085	7163	5592	23266	11024	6769	3075	23456	355	2786	3354	8929	11103	8879	6239	6258	90586	1571	219623	5108	10144	10018	10129	5238	814	6263	26115	1232	8028	26235	26212	4108	1182	4107	9890	7691	4661	22832	2048
33	GSEA_GP8_FOXO_stemness.r=0.931_TTGTTT_V$FOXO4_01	Median Expression	GSEA	64577	4208	6328	25813	260425	6096	6095	373509	60509	23266	23284	92342	351	159195	22903	153743	143471	55893	8473	22907	55760	22859	10445	8577	55144	56160	83473	23294	51102	56751	343472	27346	55227	8927	284739	4140	80111	25777	4139	3728	5499	26037	171017	124637	26135	9451
34	GSEA_HDAC_TARGETS_DN_HELLER	Median Expression	GSEA	6503	9871	55301	29760	894	3337	55117	6095	7804	10402	55179	6612	23705	64699	30845	1488	22882	7298	55244	81029	23189	60489	1647	64109	5657	79094	6059	343450	23212	79159	3182	23645	8840	8496	596	80774	55003	468	9447	51131	4242	6641	4068	5901	10735	23082
35	GSEA_IGF1R_PATHWAY_BIOCARTA	Median Expression	GSEA	3265	5894	6464	5577	5604	5567	5568	207	5290	3480	2885	5573	5576	5575	107	3667	5595	7533	572	5295	6654	6195	5594
36	GSEA_MTOR_PATHWAY_BIOCARTA	Median Expression	GSEA	5728	5164	7249	5170	8661	8672	207	2475	5290	1982	8569	6198	2280	1981	7248	1973	5515	1974	1975	1977	1978	5295	6194
37	GSEA_MYC_amplified_chr8q24	Median Expression	GSEA	90990	137797	27161	114	58500	594842	5339	90987	286101	66001	4856	51305	84948	401480	50807	50626	64798	23237	23639	286109	22882	375686	23167	84875	54108	90342	55039	10086	3037	26233	2131	619460	646338	340385	5168	114822	642574	23246	23513	8928	8629	642658	575	100000000	9401	80728
38	GSEA_PD1_SIGNALING_REACTOME	Median Expression	GSEA	1445	29126	3113	3115	3117	3118	3123	3125	3127	3932	5133	5777	80380	915	916	917	919	920
39	GSEA_PI3K_CASCADE_REACTOME	Median Expression	GSEA	10818	117145	152831	1796	1975	1977	1978	1981	208	2246	2247	2248	2249	2250	2251	2252	2253	2254	2255	2260	2261	2263	2264	2475	2549	26281	27006	2885	29904	30849	3630	3643	3667	5140	51422	5170	51719	5289	5290	5291	5295	5296	53632	54106	5494	55437
40	GSEA_RESPONSE_TO_ANDROGEN_UP_NELSON	Median Expression	GSEA	10397	2683	65986	6728	87	10513	10461	79689	9455	3880	6319	5264	6675	2181	8611	3157	3005	51171	3422	8554	55502	56172	10257	27347	9218	6414	4824	567	8848	11057	10627	3248	8821	3685	3977	6616	8241	7163	1622	9622	3856	84159	4094	81563	9590	6652
41	GSEA_RETINOL_METABOLISM_KEGG	Median Expression	GSEA	6121	1577	54490	1579	1576	50700	9249	1562	125	126	127	128	84649	124	53630	157506	1592	10720	1559	158835	340665	1557	1558	1555	79799	1553	54657	1551	54658	54659	56603	10170	54575	8694	54576	54577	54578	216	54884	145226	9227	51109	54579	1548	1549	284541
42	GSEA_GP5_MYC_targets_TERT.r=0.922_PerouLab_MM_Myc_1pFDR_UP_Genome_Biology_2007_PMID.17493263	Median Expression	PMID.17493263	415116	285605	255411	170680	222642	352999	317781	392780	29968	94121	203197	66005	641371	376132	11341	339230	246777	388125	134637	349633	60559	117584	87178	164592	197322	167227	155185	140838	126003	159371	23779	146439	152926	157570	85476	132001	138802	142940	150962	161424	81894	51809	201595	113452	123355	144577
43	GSEA_GP11_Immune_IFN.r=0.965_PerouLab_MInterferon_Cluster_BMC_Med_Genomics_2011_PMID.21214954	Median Expression	PMID.21214954	6772	10068	54739	567	91543	94240	5696	5698	56829	3430	23586	388646	3627	6352	163351	4283	29126	85441	7318	3959	83666	10379	103	3433	8638	55601	64135	64108	115361	10561	4599	9636	684	11274	3434	4939	81030	54625	345611	6773	64761	6672	2633	116071	9111	146857
44	GSEA_GP19_1Q_amplicon.r=0.967_PerouLab_HS_Green17_BMC_Med_Genomics_2011_PMID.21214954	Median Expression	PMID.21214954	10067	10092	10158	10228	10262	103	10456	10472	10623	1063	10638	10654	10712	10753	10765	10899	11243	11266	11279	116832	1196	123	1314	1382	142	159	1660	1942	1945	2029	2058	2155	2224	223	2271	22796	22874	22926	23219	23248	23385	23528	23623	2444	25782	25874
45	GSEA_GP2_Immune_Tcell_Bcell.r=0.949_PerouLab_Immune_cell_Cluster_BMC_Med_Genomics_2011_PMID.21214954	Median Expression	PMID.21214954	7453	3620	6039	8477	4332	27074	25816	4067	7128	51316	3575	1439	3659	7133	27299	56833	55423	4050	5790	1236	9806	5341	972	3108	3122	3109	2207	7305	7805	3689	712	6772	6373	3627	2633	6890	5698	55303	5552	10875	3059	9938	3932	2124	55843	9595
46	GSEA_GP22_16Q22_24_amplicon.r=0.927_PerouLab_16q24x_BMC_Med_Genomics_2011_PMID.21214954	Median Expression	PMID.21214954	23787	23294	5467	89845	7005	23174	9798	23417	54971	11060	23019	10300	65057	23450	27183	9100	23300	10664	9785	4775	81577	79726	55625	22980	5119	9780	23644	6687	9013	8558	10428	1783	2734	55794	10204	22879	7014
47	GSEA_GP4_MES_ECM.r=0.954_PerouLab_HS_Red7_BMC_Med_Genomics_2011_PMID.21214954	Median Expression	PMID.21214954	10085	1009	10154	10184	10234	10398	10409	10417	10418	10457	10468	10484	10536	10544	10609	10630	10631	10699	10970	10981	11015	11027	11031	11075	11082	11096	11098	11117	11167	11183	112399	11259	113	11346	114899	1176	1272	1277	1278	1281	1282	1289	1290	1292	1293	1300
48	GSEA_GP9_Cell_cell_adhesion.r=960_PerouLab_MClaudin_Cluster_BMC_Med_Genomics_2011_PMID.21214954	Median Expression	PMID.21214954	83481	5792	27134	3815	7571	340371	10809	2068	6565	114569	163732	23254	113452	85462	1159	780	3898	1525	23286	79977	6663	11187	3664	7022	152189	55286	219738	85415	2001	54682	29841	349633	3775	146439	149428	91862	5652	153562	4950	3875	286077	254427	10653	27237	2886	200634
49	11q13_Amplicon_BMC.Med.Genomics.2011_PMID.21214954	Median Expression	PMID.21214954	5612	51773	79731	1207	79053	4718	9846	28971	5058
50	12qMDM4_BMC.Med.Genomics.2011_PMID.21214954	Median Expression	PMID.21214954	4848	55508	10329	8089	56890	57122	29110	64786	23592	10576
51	13q14_Amplicon_BMC.Med.Genomics.2011_PMID.21214954	Median Expression	PMID.21214954	55757	55208	79587	2963	23483	10284	2971	10240	29079	11340	9818	7347	55270	3843	10426	55795	65110	8881	8451	55739	10206
52	15q25_Amplicon_BMC.Med.Genomics.2011_PMID.21214954	Median Expression	PMID.21214954	9960	10073	23423	26276	79719	10588	10239	51335	10519	84942	79631	6727	60490	54939	56906	55070	50810
53	16.13_Amplicon_BMC.Med.Genomics.2011_PMID.21214954	Median Expression	PMID.21214954	54820	6817	6799	10607	2975	23361	51734	3163	3029	64223	527	4833	26063	55718	10573	5531	7874	10295	5073	51451	7284	10101	79622	51728	1632	4350	4913	23295	9091	10127	89941	9894	1877	55692	79641	84148	78994	10421	6923	9093	10921	8479	64428	22928	25880	9742
54	16q23_Amplicon_BMC.Med.Genomics.2011_PMID.21214954	Median Expression	PMID.21214954	164	51693	5432	80777	11051	5257	10294	81631	11345	54386	3281	865	1459	51388	1327	353	16	8883	29105	57019	57017	51647	29100	5713	3735	10328	56942	9688	51192	57215
55	17PP13_Amplicon_BMC.Med.Genomics.2011_PMID.21214954	Median Expression	PMID.21214954	50628	2314	8802	5096	60528	9513	55090	1352	7775	8834	25979	55421	6416	26001	10594	9482	9611	54902	5306	5048	7531	7326	6117	51031	3682	8533	83460	5694	79003	51009	5636	8402	55178	55720	11337	29098	81565	1366	9552	4927	26168
56	17q25x_BMC.Med.Genomics.2011_PMID.21214954	Median Expression	PMID.21214954	5833	124565	63893	57513	23265	2548	5986	9775	51547	1453	26502	9146	55666	56270	79672	79415	10801	4097	1468	79701	5831	5635
57	19p13_Amplicon_BMC.Med.Genomics.2011_PMID.21214954	Median Expression	PMID.21214954	4218	7001	57130	55201	9524	5300	10053	2639	5589	51073	55850	54555	8625	25804	25796	29086	9817	8666	11018	51295	5886	6597	79629	2063
58	1p36_Amplicon_BMC.Med.Genomics.2011_PMID.21214954	Median Expression	PMID.21214954	22826	29914	1855	6429	23028	51441	55229	57470	5195	11315	3065	8668	10726	553115	10946	55108	49856	93974	79947	54952	54707	6195	26119	1376	56998	23673	23585	9731
59	3p21Amplicon_BMC.Med.Genomics.2011_PMID.21214954	Median Expression	PMID.21214954	6988	11334	25915	11068	11070	51368	25864	95	10641	79714	7384	22907	6697
60	4p16_Amplicon_BMC.Med.Genomics.2011_PMID.21214954	Median Expression	PMID.21214954	8310	118	54872	10296	8603	7469	6047	1487	7466	3064	10336	79155	53407
61	5Q_Breast.Cancer.Res.Treat.2012_PMID.22048815	Median Expression	PMID.22048815	5884	10111
62	8p_Amplicon_BMC.Med.Genomics.2011_PMID.21214954	Median Expression	PMID.21214954	51110	6873	6713	51606	79752	51366	8895	55039	11236	5828	9166	23212	54845	10247	9897	23471	51001	528	55156	51582	51123	29088	7336	9694	54968	28957	6921	10987	5440	28998	56943	92140	9650	79139	81034	7534	5885	29028	55093	6917	10434	10565	7163	7553	51337	8733
63	8p22_Amplicon_BMC.Med.Genomics.2011_PMID.21214954	Median Expression	PMID.21214954	661	55140	63898	11030	9583	84549	55326	7486	2222	64760	55909	66036	29883	2961	5516	51669	10671	23484	7993	55756	665	5520	55246	57509	54793	23516	79618	7991	7976	38	4482
64	Activate.Endothelium_Clin.Exp.Metastasis.2014_PMID.23975155	Median Expression	PMID.23975155	20	79814	54443	333	115557	379	253982	84752	8702	329	641	669	672	84446	701	90417	55732	389336	79783	84688	55071	771	6368	1062	8208	26958	285521	1543	23002	9787	26052	54935	219670	2115	2119	201627	151176	26261	84824	51303	79951	202020	2335	2527	221914	55355
65	ACTIVATED_BLOOD_NEUTROPHIL_SIGNATURE_Nat.Cell.Biol.2019_PMID.31263265	Median Expression	PMID.31263265	3043	1514	3039	2791	3043	10398	2815	11313	27013	928	51635	10482	3655	5473	1191	8294	10170	64805	65213	4201	6840	11182	3555	7850	653361	5196	3181	84419	6503	3040	4601	820	4792	4282	1831	4001	65125	51274	1611	9246	11345	89875	3187	51499	976	4940
66	ACTIVATED_CANCER_CELL_SIGNATURE_Nat.Cell.Biol.2019_PMID.31263265	Median Expression	PMID.31263265	6604	4811	57113	266697	7439	123745	284047	142689	400927	400706	440352	101928708	724031	84203	649622	90113	1415	114900	3115	63036	1181	84700	5408	5521	85439	389840	89780	7373	60468	9228	4158	340061	285598	169714	27087	1292	10501	7274	51168	10336	94025	3785	85442	6915	117	442028
67	ACTIVATED_LUNG_MSC_SIGNATURE_Nat.Cell.Biol.2019_PMID.31263265	Median Expression	PMID.31263265	51110	54788	80325	10813	3303	80760	10109	8888	55133	51295	2145	70040	56990	63934	140710	81796	3858	5211	79603	1116	79774	10210	11263	23127	89797	51076	100127206	58478	11019	54434	330	79791	114583	79228	8324	6370	58497	10350	348180	30812	29109	55761	9659	53828	50509	11059
68	ACTIVATED_LUNG_NEUTROPHIL_SIGNATURE_Nat.Cell.Biol.2019_PMID.31263265	Median Expression	PMID.31263265	467	8832	79145	143384	115817	3265	80153	92241	123	6222	84919	9698	10905	334	23741	2778	51324	23048	10999	63935	1479	11052	22898	54542	7884	258010	23360	63931	64961	23412	5711	58476	26292	4520	9686	1613	7704	85439	26156	9748	56688	5439	9169	6856	10011	6414
69	ADM_S100A10_A110NDGR1_Cluster_BMC.Med.Genomics.2011_PMID.21214954	Median Expression	PMID.21214954	7378	56935	23597	5214	794	51129	133	123	10397	4828	9168	6282	6281	6251	9334	1051	4321
70	African_and_European_Ancestry_in_TCGA_Negative_JAMA.Oncol.2017_PMID.28472234	Median Expression	PMID.28472234	6234	10942	2562	4744	53832	1470	480	441869	1672	90784	120114	474170	162632	30835	4360	170689	27065	844	10319	132671	7373	5166	273	55273	441631	10740	119	340273	254559	147463	79986	10871	5028	10343	54360	145581	284565	128553	3357	56849	349196	5321	6330	121512	388697	653188
71	African_and_European_Ancestry_in_TCGA_Positive_JAMA.Oncol.2017_PMID.28472234	Median Expression	PMID.28472234	11152	5822	10102	83787	1774	317781	55020	285359	11277	60343	441502	26255	26063	3850	541471	2232	6231	440498	84809	983	116447	439921	84288	54986	548644	56729	140893	653645	9212	3250	388677	55766	85366	347688	10911	375133	285852	8605	999	83882	400710	462	6349	2953	400696	377047
72	AGE_associated_SOOD_Genome.Biol.2015_PMID.26343147	Median Expression	PMID.26343147	177	182	203	403	487	948	1277	1757	2128	2529	3084	3148	3594	4000	4185	4320	4329	4598	5101	5576	5833	5864	6327	6337	6693	6835	7036	7037	7049	7087	7755	8353	8482	8621	8667	8935	9379	9651	9902	10370	10495	10498	11033	11338	22924	23261
73	aMaSC_HsEnriched_BCR.2015_PMID.25575446	Median Expression	PMID.25575446	6578	23379	79192	55197	5362	1301	11122	9200	9882	11178	51765	3084	4909	10898	153572	26232	2810	2788	57158	117196	80206	55847	163702	50624	6854	134266	26275	2246	5507	26136	57829	23213	55180	54997	72	148641	7041	80179	329	3909	2888	858	4908	57834	4129	79750
74	aMaSC_HsEnriched_Refined1_BCR.2015_PMID.25575446	Median Expression	PMID.25575446	2621	72	5154	11178	27122	6876	91624	80206	5021	4909	84417
75	aMaSC_Lim09_BCR.2015_PMID.25575446	Median Expression	PMID.25575446	1308	2922	8626	1592	4345	8128	84417	130733	65989	3852	650517	3861	5021	6622	3038	5268	667	253827	1264	4908	84659	5243	6696	83857	9938	200150	140862	4638	3779	1830	3909	6876	84951	374946	4855	3854	27122	80206	27190	5507	1620	72	117195	4311	81029	57158
76	aMaSC_Prat_BCR.2015_PMID.25575446	Median Expression	PMID.25575446	1308	8626	3038	57451	667	4638	27122	4345	80206	5268	5021	2078	84951	72	3852	347902	2	9938	3909	83857	4855	130733	3084	11122	23213	3655	6273	79623	2268	2263	8714	5507	148641	3691	2621	1830	1012	91624	8614	6696	374946	4908	59	4129	4629	3275
77	aMaSC_Shehata_BCR.2015_PMID.25575446	Median Expression	PMID.25575446	72	1308	59	3861	6876	27122	3852	3872	441019	3038	3854	2	4495	5021	644314	7169	4501	8626	4493	4489	50805	667	4314	83700	894	117195	4502	165	1410	2995	4855	4638	114907	4629	857	5268	5621	5010	25999	25891	347733	1825	10630	8714	2621	374946
78	AMPH_EPIREGULIN_Cluster_BMC.Med.Genomics.2011_PMID.21214954	Median Expression	PMID.21214954	374	2069	213	8425	2318	9172	1734	26289	4915	5154	1288	27190	9542	1908	810	54997	5179	1465	3201	1620	54886	114818	477	5744	128553
79	Apocrine_Features_J.Pathol.2017_PMID.27861902	Median Expression	PMID.27861902	2677	8564	4199	10200	6836
80	aStr_HsEnriched_BCR.2015_PMID.25575446	Median Expression	PMID.25575446	80176	9363	10052	710	92017	9935	286133	48	1675	130271	1289	8510	120376	5159	91543	4969	84034	6863	92162	1902	3075	5218	285195	2009	2328	3554	6383	8817	5573	149111	6423	145258	5166	8738	8406	54510	1236	730	23127	23428	7291	128077	5966	5552	339768	463
81	aStr_HsEnriched_Refined1_BCR.2015_PMID.25575446	Median Expression	PMID.25575446	3270	8788	25	6909	4097	23433	9265	2159	2719	5159	7291	730	9435	1742	79981	92162	89801	57161	51299	285590	4035	26508	8829	149111	6649	53826	27147
82	aStr_HsEnriched_Refined2_BCR.2015_PMID.25575446	Median Expression	PMID.25575446	1123	8445	390	2736	710	6275	2009	3671	4920	1809	1289	1293	1303	1009	1278	1290	1462	2200	1513	4060	115908	22795	6423	4313	8840	79070	7130	4958	23414	8076	10417	7043	8483	79652	10234	6695	8642	5118	64175	30008	51450	83716	9945	57333	2328	3554
83	aStr_Lim09_BCR.2015_PMID.25575446	Median Expression	PMID.25575446	6863	8788	5179	4060	1278	1293	10319	84935	5159	1290	8406	7058	1281	1634	117581	5730	7293	5396	131873	5156	7472	400169	9242	1289	149111	145581	27319	1277	5118	1513	623	9945	4239	9839	1910	3037	6423	5069	57124	56944	633	10630	5649	25890	1805	221476
84	aStr_Prat_BCR.2015_PMID.25575446	Median Expression	PMID.25575446	4319	1634	6387	4321	4060	1281	9839	6423	1910	1513	2192	1293	3569	5159	3075	286133	8406	4239	2191	4327	6913	623	185	1675	8490	23704	7291	3598	3082	25960	5156	387763	84870	94031	3479	7412	4312	10418	1514	11211	4969	4489	1278	216	2669	10417
85	aStr_Shehata_BCR.2015_PMID.25575446	Median Expression	PMID.25575446	387763	1675	7058	5159	4314	1293	3569	4060	633	8406	6515	55384	1282	1514	1281	347	10468	8788	5179	2192	10630	1278	84935	4239	57007	1513	83716	220323	1290	5396	25890	6678	3489	4319	1910	7130	5743	1634	10409	2669	2199	2318	10457	7291	9945	7077
86	B_Cell_cluster_Iglesia_CCR.2014_PMID.24916698	Median Expression	PMID.24916698	3512	9834	608	83416	5450	973	96610	8755	389643	150365	974	5079	2208	79368	643	930	84824	640	115350	931	1269	55024	23495
87	B_lineage_MCP_PMID.31942075_PMID.31942077	Median Expression	PMID.31942075|PMID.31942077	55024	930	933	973	1380	79368	3514	931	5079
88	BASAL_Cluster_BMC.Med.Genomics.2011_PMID.21214954	Median Expression	PMID.21214954	11341	5806	3945	1756	55612	4281	8645	57348	51442	1824	3815	3914	3400	4781	53335	11254	23336	6376	83439	2296	221061	1410	8424	2824	5268	8190	23650	6422	6663	2568	3861	3872	3852	1825	25928	5650	5653	11202	25818	1001	8842	8324	72	3779	23321	4240
89	Bcell_IL10_MINUS_LIN_J_Immunol.2014_PMID.25080484	Median Expression	PMID.25080484	6504	3586	3569	4049	374	50832	1259	5167	2745	54512	92935	6723	760	6507	55176	1960	3280	3662	9021	10406	79005	10794	6503	51559	11147	55784	92002
90	Bcell_IL10_PLUS_LIN_J_Immunol.2014_PMID.25080484	Median Expression	PMID.25080484	225	481	822	901	946	1491	1545	1831	2149	2170	2213	2316	2838	3087	3512	3552	3587	3597	3663	3687	3695	3782	3937	3956	4000	4046	4063	4233	4938	4940	5027	5996	6346	6505	6843	9235	9447	9760	10150	10225	10550	10628	10752	10800	11343	22797
91	Bcell_Tcell_Cooperation_Cell.2019_PMID.31730857	Median Expression	PMID.31730857	115350	640	3502	3502	28776	3500	3502	3514	3512	973	100423062	100423062	3495	930	931	5079	3581	6363	51617	2864	959	28558	28621	387923	388507
92	Bcells_Centroblast_J.Clin.Oncol.2015_PMID.25800755	Median Expression	PMID.25800755	10810	7482	148229	651	23710	4086	54443	259266	55635	7153	100126791	283431	9928	10112	80119	1062	25959	8739	4297	157740	101928620	81930	79071	5450	23089	1063	9787	27109	4751	9582	10733	4798	5577	124989	983	100506844	23766
93	Bcells_Centrocyte_J.Clin.Oncol.2015_PMID.25800755	Median Expression	PMID.25800755	55448	8622	101929450	639	54820	116931	94121	327657	64805	597	6662	88	3117	55971	4023	9638	92737	1960	25953	3119	84102	285313	63971	10170	55785	816	285237	5795	1289	53354	23334	54072	55293	147945	3690	100506930	27197	148808	114614	9782	2956	9133	100509457	406947	724102
94	Bcells_Memory_J.Clin.Oncol.2015_PMID.25800755	Median Expression	PMID.25800755	6352	170371	946	1230	100506071	3684	27197	374618	1285	1690	440823	27163	2857	2212	79026	195	83417	339005	10382	285972	8082	3310	440253
95	Bcells_Naive_J.Clin.Oncol.2015_PMID.25800755	Median Expression	PMID.25800755	55211	10252	4345	351	8496	5243	167410	140733	643733	100128252	8531	8115	342926	909	5796	9976	646113	4606	1901	6328	2650	401312	646588	63934	2208
96	Bcells_Plasmablast_J.Clin.Oncol.2015_PMID.25800755	Median Expression	PMID.25800755	639	857	999	1534	2081	2487	2549	3493	3537	3655	3662	4121	4189	4695	7421	7494	8339	8343	8344	8346	8347	8349	8970	9236	10788	10802	10970	22862	22936	23446	23710	23766	28396	28831	51237	51303	54502	54855	55132	57823	64764	64778	79694	91319	115908	144535
97	bMYB_Signature_Oncogene.2009_PMID.19043454	Median Expression	PMID.19043454	116832	220042	259266	29127	91368	64151	205860	11339	56992	84969	113130	51659	23594	81930	55872	26271	90381	84057	80714	27345	28227	6241	3161	1164	79075	5347	80178	2237	55166	7443	54478	4940	51203	81620	83596	332	2717	10721	4241	5984	9156	7980	4605	10403	8438	22974
98	BPMS_7.Genes_PLoS.One.2013_PMID.24349199	Median Expression	PMID.24349199	5037	7038	571	8091	4312	7852	6696
99	C_MYB_Signature_PLoS.One.2010_PMID.20949095	Median Expression	PMID.20949095	9	10	27	38	123	133	185	202	220	334	367	379	390	392	411	501	648	655	678	747	777	799	840	966	1001	1016	1063	1068	1073	1075	1111	1119	1191	1230	1287	1288	1298	1303	1312	1371	1466	1477	1491	1501	1515	1592
100	C3_TAG_RESPONDING_Usary_Clin.Cancer.Res.2013_PMID.23780888	Median Expression	PMID.23780888	2947	2944	721	378938	27303	347	2192	7123	7069	84649	32	3590
101	C3_TAG_UNTREATED_Usary_Clin.Cancer.Res.2013_PMID.23780888	Median Expression	PMID.23780888	28982	6877	79915	64682	9282	9585	7913	3619	2956	64105	10592	79733	1062	29089	51514	3148	4175	2491	195828	10051	4173	1660	1871	7690	6432	23347	51765	1122	11168	23178
102	CD103_Negative_Cancer.Cell.2014_PMID.25446897	Median Expression	PMID.25446897	728	10894	8714	4360	6614	23166	713	712	140738	10461	714	338773	58475	348	8529	54209	51284
103	CD103_Positive_Cancer.Cell.2014_PMID.25446897	Median Expression	PMID.25446897	3815	1236	55509	2322	140685	3394	151888	4610	283420
104	CD34_CD36_Cluster_BMC.Med.Genomics.2011_PMID.21214954	Median Expression	PMID.21214954	8406	3489	5168	56920	1149	2878	2819	948	5950	8639	4023	2167	9370	5346	125	2273	3952	947	10252	5627	8611	9590	83700	4692	8404	9452	358	730	7102	58494	857	2791	9079	10186	1003	10351	4222	2532	7450	7122	2078	9353	5175	1036	1675
105	CD68_cluster_Iglesia_CCR.2014_PMID.24916698	Median Expression	PMID.24916698	126364	27180	27036	968	3687	55803	719
106	CD8_cluster_Iglesia_CCR.2014_PMID.24916698	Median Expression	PMID.24916698	256380	151888	925	3003	29909	128611	5790	374403	10663	4063	9744	27240	201633	3932	55423	919	84174	3702	10225	4068	921	916	914	915	2833	114836	3561	53347	6504	149628	939	50852	3001	30009	5778	6352	4818	5551	962	154075	917	7535	22914	283897	923	5579
107	Chromogramin_BMC.Med.Genomics.2011_PMID.21214954	Median Expression	PMID.21214954	51207	6506	57586	8120	3777	116	3642	5122	9607	1114	7857	429	23544	6616	51617	29106	4922	10900	783	9863	333	1113	51412
108	CIBERSORT_B_cells_memory_Nat.Methods.2015_PMID.25822800	Median Expression	PMID.25822800	10863	60468	55024	640	4064	930	911	933	951	969	971	973	974	1380	643	9214	2213	79368	2444	2841	91316	3087	3112	3495	3507	3514	91353	3394	80183	4050	9450	931	4829	5026	5368	5790	55103	10235	150094	6557	6689	26228	29802	9447	240	1235
109	CIBERSORT_B_cells_naive_Nat.Methods.2015_PMID.25822800	Median Expression	PMID.25822800	5244	10863	60468	55024	605	79656	640	673	4064	930	911	933	951	969	971	973	974	1380	643	55840	9214	2208	2213	79368	2444	2841	91316	3087	3112	3495	3507	3514	91353	3566	3394	80183	283876	4050	9450	4224	57553	931	55335	4829	5026	9934
110	CIBERSORT_Dendritic_cells_activated_Nat.Methods.2015_PMID.25822800	Median Expression	PMID.25822800	51296	1193	6362	54209	6357	6367	7941	6361	910	913	2359	4321	55026	6355	10148	6614	3357	80380	6352	3559	5739	1236	6363	3627	6373	79132	8820	3620	10964	8942	27074	51365	83937	91543	11182	7130	1593	7293	6364	58504	330	6346	941	942	56548	2117
111	CIBERSORT_Dendritic_cells_resting_Nat.Methods.2015_PMID.25822800	Median Expression	PMID.25822800	51296	1193	968	51313	6362	54209	199	50856	2535	246	6357	30835	10462	10261	4688	54	79839	6367	7941	56833	945	64581	6039	6335	911	2208	79630	6361	909	910	913	79154	1959	2205	55640	2359	3117	4321	8496	55026
112	CIBERSORT_Eosinophils_Nat.Methods.2015_PMID.25822800	Median Expression	PMID.25822800	8809	671	932	6003	1178	9173	9934	719	10402	246	4688	53829	23569	6036	51744	8807	8972	26030	5996	55024	597	27202	1602	23604	9681	64174	2015	30817	84658	22905	2867	2696	1880	8477	222487	3568	4033	4117	4084	27334	5029	5146	27039	9185	23223	64092
113	CIBERSORT_Macrophages_M0_Nat.Methods.2015_PMID.25822800	Median Expression	PMID.25822800	366	728	968	51313	3101	10261	4688	51296	8876	8740	54	27299	79365	79839	6362	6367	6354	1116	1296	1435	2921	6374	1593	81501	2239	8685	4318	7941	5473	25797	56833	84561	54209
114	CIBERSORT_Macrophages_M1_Nat.Methods.2015_PMID.25822800	Median Expression	PMID.25822800	366	51296	27299	1116	200315	11026	10288	64127	51284	51311	6352	80830	8651	3902	3559	5739	10563	79931	1236	952	43	80833	408	6363	6355	958	1193	3627	6373	4283	1594	79132	10148	2687	8820	3620	10964	643314	8942	27074	51365	83937	91543	6614	6504	11182
115	CIBERSORT_Macrophages_M2_Nat.Methods.2015_PMID.25822800	Median Expression	PMID.25822800	51296	27299	1116	51311	6355	1193	10148	2687	6614	968	51313	6362	54209	199	5199	50856	2242	2535	64231	53829	51314	920	246	6357	6358	6368	30835	10462	1414	55691	2952	3269	3357	80896	80380	5973	81029
116	CIBERSORT_Mast_cells_activated_Nat.Methods.2015_PMID.25822800	Median Expression	PMID.25822800	945	2205	84561	8809	671	932	6003	79895	1178	1215	1359	1511	3067	27306	2206	4602	50508	4914	5023	5553	5874	29091	7177	6364	6346	2921	3002	1437	6351	3562	3198	3552	3553	9173	3567	81698	115123	7006
117	CIBERSORT_Mast_cells_resting_Nat.Methods.2015_PMID.25822800	Median Expression	PMID.25822800	945	2205	84561	8809	2672	671	1088	932	6489	6003	26228	9934	9508	154	79895	55589	719	1178	1215	1359	10321	1511	79843	400451	3067	27306	4056	2206	4602	50508	4914	5023	54852	5553	5874	23176	29091	7177
118	CIBERSORT_Monocytes_Nat.Methods.2015_PMID.25822800	Median Expression	PMID.25822800	8875	2354	199	200315	366	432	433	683	728	729230	912	945	968	978	5199	51363	50856	64581	9586	1441	51313	2219	2242	2357	2535	3055	3101	3176	10855	10261	11027	11026	10288	7940	4210	4332	64231	4688	4778	114548	64127	53829	23569	6036	6039	6283
119	CIBERSORT_Neutrophils_Nat.Methods.2015_PMID.25822800	Median Expression	PMID.25822800	1178	9934	4688	53829	23569	8807	8972	26030	64174	30817	84658	2867	222487	4117	4084	9185	79865	7130	199	10261	1116	51311	5199	366	200315	10288	728	8876	25797	8875	978	51363	9586	1441	2357	11027	7940	4210	4332	4778	6283	7097	820	79908	838	1232
120	CIBERSORT_NK_cells_activated_Nat.Methods.2015_PMID.25822800	Median Expression	PMID.25822800	919	3932	4068	3004	3560	3820	79037	3002	6352	3001	8530	10578	2999	3824	22914	5551	5729	28526	51744	8807	7535	10225	924	5790	4818	3595	1521	3823	51348	8809	3802	3812	10004	79899	53637	30009	7294	29909	2841	1803	4050	4049	969	1437	3458	9402
121	CIBERSORT_NK_cells_resting_Nat.Methods.2015_PMID.25822800	Median Expression	PMID.25822800	914	919	3932	4068	3004	28639	3560	3820	79037	3002	6352	3001	3003	8530	10578	2999	3824	22914	5551	5729	28526	11126	51744	2672	8807	7535	10225	924	5790	4818	3595	1521	3823	8302	51348	566	671	820	92211	1088	1669	1991	8809	3802	3812	8972
122	CIBERSORT_Plasma_cells_Nat.Methods.2015_PMID.25822800	Median Expression	PMID.25822800	973	79368	91316	3112	3495	3507	3514	91353	5026	5368	150094	939	160518	2788	80008	608	55840	23457	270	51378	6315	79703	2826	952	2848	3012	8339	3497	3738	26251	54923	100130100	4121	79694	22983	374977	51237	5081	5163	25780	5972	6003	642741	6676	27090	9333
123	CIBERSORT_T_cells_CD4_memory_activated_Nat.Methods.2015_PMID.25822800	Median Expression	PMID.25822800	914	919	915	917	924	1803	29851	3932	4068	28755	50852	53347	959	923	29909	4818	940	1493	3002	3902	6364	993	1437	10563	2842	3458	3595	3605	55801	3559	3562	3565	3578	4049	4998	5367	9136	220134	7293	79931
124	CIBERSORT_T_cells_CD4_memory_resting_Nat.Methods.2015_PMID.25822800	Median Expression	PMID.25822800	939	54923	642741	9214	4050	64919	914	919	915	917	924	1803	2323	9402	3004	29851	3575	3702	3932	51176	4063	4068	55423	6932	28755	50852	28671	28639	53347	7535	10235	959	969	5790	6352	916	923	10225	1521	29909	3001	3003	3820	4818	22821	2848
125	CIBERSORT_T_cells_CD4_naive_Nat.Methods.2015_PMID.25822800	Median Expression	PMID.25822800	939	54923	642741	9214	4050	64919	914	919	915	917	924	1803	1823	2323	9402	3004	29851	3575	3702	3932	51176	4063	11184	79884	4068	55423	6932	28755	50852	28671	28639	53347	7535	10235	9744	79722	80162	1236	959	55086	2041	79667	79690	2587	2825	27040
126	CIBERSORT_T_cells_CD8_Nat.Methods.2015_PMID.25822800	Median Expression	PMID.25822800	3514	939	54923	642741	969	9214	4050	5790	64919	6352	914	919	915	916	917	923	924	925	926	10225	56253	8530	1521	1803	1823	1844	2323	10578	29909	9402	3001	3002	2999	3003	3004	29851	3575	3702	3820	3823	8302	3824	51348	22914	3902	3932
127	CIBERSORT_T_cells_follicular_helper_Nat.Methods.2015_PMID.25822800	Median Expression	PMID.25822800	914	919	915	917	924	29851	3932	4068	28755	50852	53347	959	1493	3902	10563	2842	4049	7293	939	642741	9214	64919	3004	3702	51176	55423	6932	28671	28639	7535	969	5790	3820	1606	6489	28680	28677	11184	79884	80162	27040	79037	150094	643	767	1117
128	CIBERSORT_T_cells_gamma_delta_Nat.Methods.2015_PMID.25822800	Median Expression	PMID.25822800	914	919	915	917	3932	4068	53347	3004	55423	28639	11184	29909	27240	3560	8631	3902	6932	3820	27040	79037	3002	4063	6352	3001	3003	925	926	8530	1844	10578	2999	3824	22914	5551	5729	28526	2841	631	9024	1234	11126	51744	11314	1010	8292	10663
129	CIBERSORT_T_cells_regulatory_Tregs_Nat.Methods.2015_PMID.25822800	Median Expression	PMID.25822800	914	919	915	917	29851	3932	4068	28755	50852	53347	1493	2842	939	64919	3004	3702	55423	28639	7535	1606	28677	11184	1803	923	29909	940	3559	5367	4050	916	10225	920	11123	2825	4153	27240	8538	921	970	752014	29121	1946	50943	83786	3090	203510
130	CIN70_Nat.Genet.2006_PMID.16921376	Median Expression	PMID.16921376	86	891	983	990	991	1164	1503	1717	1736	1894	1994	2146	2237	2305	2821	2956	3014	3015	3068	4085	4171	4176	4706	4751	5111	5885	5984	6240	6241	6427	6667	6790	6867	7153	7272	7374	7799	8318	9055	9133	9212	9232	9319	9833	9918	10112
131	Claudin_High_Genome.Biol.2007_PMID.17493263	Median Expression	PMID.17493263	168667	83880	404203	85028	7106	26999	9922	788	8717	143	196383	57406	1992	26578	83641	652598	4048	23531	8445	130589	55862	4864	123591	6035	3142	94039	1539	59347	7178	79161	3682	23064	3459	2919	2921	3553	112616	9466	1844	22900	1803	653743	28962	9267	84230	55576
132	Claudin_Low_29_Cancer.Res.2009_PMID.19435916	Median Expression	PMID.19435916	55718	23042	23204	139231	9914	57619	10040	4151	1999	10529	5349	1365	1364	55040	79170	1366	10653	114569	999	54836	54845	7163	57530	4950	80004	158584	1353
133	Claudin_Low_Genome.Biol.2007_PMID.17493263	Median Expression	PMID.17493263	151009	85415	3883	6575	2036	5445	11082	288	54894	64110	55107	1573	22905	3280	5357	3336	8187	8996	3303	4282	124454	10388	10579	113452	257000	83481	4291	55740	3775	6242	7022	84283	284252	57549	1942	5792	6662	29841	64065	7005	10848	1832	3664	10765	7984	80092
134	CORE_B_CELL_signatures_Garber_Cell.Mol.Gastroenterol.Hepatol.2017_PMID.28508029	Median Expression	PMID.28508029	10863	240	60468	55024	53335	53335	53335	53335	640	643	930	933	951	951	958	971	973	2208	2788	3087	3112	3117	114884	5368	25780	6689	8115	29802	9934	55103	55103	55103	6039	6328	608
135	Cytotoxic_lymphocytes_MCP_PMID.31942075_PMID.31942077	Median Expression	PMID.31942075|PMID.31942077	925	8320	83888	10578	3823	8302	3824
136	DAN_ImmuneActive_Cell.2019_PMID.31730857	Median Expression	PMID.31730857	12	356	433	640	718	914	915	916	917	920	923	924	925	927	930	931	933	939	940	959	969	972	973	1233	1380	1493	1776	2634	2841	2864	3002	3109	3111	3112	3117	3120	3135	3274	3363	3458	3495	3500	3502	3512	3514	3559
137	Down_regulated_upon_N_RAS_repression_Cell_Rep.2015_PMID.26166574	Median Expression	PMID.26166574	154091	54944	6352	57664	6364	84419	162394	27074	11009	1440	4261	241	2119	9314	6348	8876	6373	4081	10866	3007	7133	9390	3290	9582	9939	3576	9705	3294	158511	55228	1437	51561	1520	200315	89795	9734	636	116496	3627	2313	26212	84073	401285	3936	1551	682
138	Ductal_Carcinoma_In_Situ_J.Pathol.2017_PMID.27861902	Median Expression	PMID.27861902	54988	64400	271	84707	51283	353500	55017	79697	11161	81556	60526	999	1107	2055	113540	1616	157697	201163	161835	2739	728340	3005	3770	100130093	389333	400931	645332	4209	64747	4319	4306	57451	114770	10908	5463	339122	51109	79918	376497	116238	7089	64061	51060	152687
139	Duke_Module01_acidosis_Mike_PMID.20335537	Median Expression	PMID.20335537	219	51129	604	694	4345	1604	1028	8837	51232	1490	2202	10160	2774	653519	51463	728932	51704	2886	2944	2946	3033	3105	3106	3107	3133	3135	3383	3597	3628	8660	25959	55679	25802	4067	28992	90634	4792	23596	10133	5728	11030	9185	6038	51435	6648	8082
140	Duke_Module02_akt_Mike_PMID.20335537	Median Expression	PMID.20335537	18	47	48	8574	208	501	518	155066	8553	11161	56941	1025	1069	3426	1293	51379	1429	1727	1808	10682	27102	9470	2059	2222	2273	2281	2353	2512	2539	2643	2650	2752	2771	55204	2821	9380	2934	54985	50865	8692	3417	3418	3638	10314	4048	9500
141	Duke_Module03_betacatenin_Mike_PMID.20335537	Median Expression	PMID.20335537	55326	29028	9532	580	10950	55299	90355	9994	898	9134	990	8317	8851	8208	1690	10675	1786	29980	79075	51514	9521	22875	5393	2237	51083	51659	64785	2743	51053	85236	25896	81875	80271	115207	9933	51176	55388	4171	4172	4173	4174	4175	2956	4678	4839	10528
142	Duke_Module04_e2f1_Mike_PMID.20335537	Median Expression	PMID.20335537	9429	2180	231	8574	239	29028	9331	79184	171546	147339	896	9134	10309	100133941	23097	1027	1031	1050	79959	55907	1301	79174	8450	1633	23576	22982	1741	9829	23234	29980	1808	51514	8445	26298	5610	22875	2146	2237	2258	2309	2568	2643	2673	9837	2746	2747
143	Duke_Module05_egfr_Mike_PMID.20335537	Median Expression	PMID.20335537	64746	154	79026	113146	202	11214	11214	51421	54882	360	374	10565	94134	9411	23204	55207	10092	9048	51665	493	6310	571	8412	8553	10904	665	694	84981	55765	79098	51719	801	805	808	55450	23271	124583	54520	901	57018	905	100133941	960	1009	9425	634
144	Duke_Module06_er_Mike_PMID.20335537	Median Expression	PMID.20335537	10965	8416	367	10974	56967	771	1534	55152	51181	55040	2099	2203	3169	10023	2625	23171	55662	3416	26128	8825	10916	79083	5094	5204	8766	388	79641	55316	6509	10559	6643	9580	25803	54961	10402	10610	7033	7043	10245	10140	9654
145	Duke_Module07_glucosedepletion_Mike_PMID.20335537	Median Expression	PMID.20335537	813	833	25932	54541	4189	2058	2887	26959	9709	10525	3475	54800	81631	4779	6303	23753	11231	6400	23064	9197	54407	6520	60682	54386	54664	7453	8565
146	Duke_Module08_her2_Mike_PMID.20335537	Median Expression	PMID.20335537	37	80221	211	51326	23130	53335	624	11067	738	55731	80169	79919	653483	221749	79820	30850	1087	1201	1306	1298	1362	1384	51755	56253	54541	9681	9249	22839	1824	1846	1956	1958	1999	26284	2064	10144	2194	2294	2308	9518	26088	2678	56834	2886	79885	3099
147	Duke_Module09_hypoxia_Mike_PMID.20335537	Median Expression	PMID.20335537	133	205	347902	51129	375248	55139	22863	8553	79365	664	665	694	901	10370	1615	55760	54583	2026	30001	10144	26355	29902	58516	157574	56929	80307	2353	23462	3099	3475	51141	55818	3939	3964	4017	10135	10397	4714	54995	5033	5163	8800	5209	5210	5223	5230
148	Duke_Module10_ifna_Mike_PMID.20335537	Median Expression	PMID.20335537	51479	23780	80830	11119	11118	10384	55337	9473	834	961	8837	56259	3627	23586	55601	23549	10468	2633	2643	2650	51191	55008	3106	3107	10437	3430	10561	10964	2537	3434	3433	3437	24138	8519	3600	3659	3665	9636	3669	3717	3964	26010	4061	4599	4600	4615
149	Duke_Module11_ifng_Mike_PMID.20335537	Median Expression	PMID.20335537	23780	80830	406	528	55509	604	11119	11118	10384	55337	9473	23607	961	1506	3627	6373	4283	23586	23549	2115	2355	10468	2633	2643	2820	387751	55008	3620	10437	3430	10561	10964	2537	3433	3437	24138	8519	3600	3659	3394	3717	65987	51056	23175	4599	79840
150	Duke_Module12_lacticacidosis_Mike_PMID.20335537	Median Expression	PMID.20335537	226	271	8623	578	29117	60314	875	51727	1382	1759	79767	2064	2065	10211	2548	2625	2664	2821	54985	9026	3098	7184	10075	3714	3913	3915	4134	55233	399687	4833	4854	4952	5214	8985	5580	5792	5829	57111	11030	5863	6238	10955	26470	8175	64847	6692
151	Duke_Module13_myc_Mike_PMID.20335537	Median Expression	PMID.20335537	60496	10257	6059	10061	100	158	55326	25909	191	10598	204	8165	64682	328	471	545	9532	617	637	23246	80135	705	28969	26098	54906	56652	55726	29902	339229	27042	65260	54680	708	56683	6936	29078	51134	79080	10576	7203	10575	22948	10694	10849	8872	1019
152	Duke_Module14_p53_Mike_PMID.20335537	Median Expression	PMID.20335537	80755	6833	27034	37	79777	47	4329	79796	322	400	54622	549	563	27077	582	689	10944	56912	60314	55778	83989	203197	158427	776	9254	23125	80279	1153	1315	51117	9646	1524	79901	1602	10521	10522	8527	1657	8448	1846	55268	114327	192669	60528	2053	2065
153	Duke_Module15_p63_Mike_PMID.20335537	Median Expression	PMID.20335537	8574	9531	9134	1727	3337	1808	10682	2222	2539	3320	3303	3304	3310	10808	9500	4277	2956	5111	6319	27346	8626
154	Duke_Module16_pi3k_Mike_PMID.20335537	Median Expression	PMID.20335537	47	2180	8574	262	157567	55156	29028	479	580	581	8553	637	6046	11118	56935	55181	813	10645	4076	9994	28952	9134	100133941	81620	8837	79094	1365	1364	9073	8161	1301	10087	1314	7464	10675	1474	1654	22982	1741	1743	3337	7266	29980	51514	1843	8445
155	Duke_Module17_pr_Mike_PMID.20335537	Median Expression	PMID.20335537	5825	36	115	226	367	10564	9411	403	8623	537	582	689	79622	91304	55194	79624	56892	771		55871	150472	445571	220869	644019	9973	1022	29082	1154	1350	1351	1488	79004	1555	1556	1580	1725	79758	9093	55837	60481	2013	2099	54512	7430	2166	90362
156	Duke_Module18_ras_Mike_PMID.20335537	Median Expression	PMID.20335537	123	51129	65124	200316	60489	9938	10109	9474	650	665	669	55299	705	28984	51187	6364	8900	898	9134	8317	79577	1051	1434	1488	2919	2921	1528	1594	1736	56521	23234	30836	1808	51514	1843	1847	1848	9521	1938	1960	8669	1973	9470	2004	2023	2069
157	Duke_Module19_src_Mike_PMID.20335537	Median Expression	PMID.20335537	11283	10949	23645	5896	6157	6168	6181	6205	6714	8295
158	Duke_Module20_stat3_Mike_PMID.20335537	Median Expression	PMID.20335537	19	133	183	9590	51129	65124	56938	517	602	604	80183	718	833	1105	10845	8531	1508	1514	10658	6374	8853	1948	1956	56929	2243	2244	2266	9945	23151	23119	3269	3484	3556	3566	3570	3691	57214	3929	3949	29967	4067	10226	23764	5606	10150	79772
159	Duke_Module21_tgfb_Mike_PMID.20335537	Median Expression	PMID.20335537	153	51129	1820	54880	8553	79669	51716	1080	1137	1291	1413	8445	8444	1969	8817	2354	5045	4616	3280	23462	3096	3207	3397	3562	3678	221037	23135	3725	3765	23199	9766	7071	8609	3824	23592	3985	647288	7798	5596	2011	23139	4209	64386	9891	5155	79955
160	Duke_Module22_tnfa_Mike_PMID.20335537	Median Expression	PMID.20335537	2181	214	23780	329	10384	56892	6347	961	55573	8837	2919	3627	6374	1540	23586	3301	55337	51343	2627	55008	3097	3174	3269	3600	3576	3669	9766	57707	57707	57149	23118	4321	55686	4501	4615	55707	9603	4814	4824	4939	11054	54726	445815	64761	51131	5293
161	Durvalumab_signature_Higgs_Clin.Cancer.Res.2018_PMID.29716923	Median Expression	PMID.29716923	3458	3902	4283	29126
162	Early_IRS_1_PLoS.One.2016_PMID.26991655	Median Expression	PMID.26991655	161742	80005	27131	60313	133746	10602	122953	153222	114907	57568	23369	7756	51491	55818	53349	4792	3694	54800	25942	9665	2633	6347	7071	1106	5927	262	2309	1955	595	19	901	3491	1655	26959	7586	1543	1848	25901	2274	1827	7057	7068	388403
163	Early_IRS_2_PLoS.One.2016_PMID.26991655	Median Expression	PMID.26991655	200734	340719	286343	161742	29995	91653	113510	64859	145741	11279	139221	133746	85463	60468	25957	196996	51363	283861	24147	57568	90427	59277	55818	112597	10221	2633	4982	3694	7791	56937	4430	55287	84441	84961	54800	1128	9665	23767	7414	5733	8507	54468	6722	6347	2274	54206
164	Early_Relapse_ER.Pos_33_JAMA.2011_PMID.21558518	Median Expression	PMID.21558518	204	793	875	1602	1834	1839	2273	2521	2625	3934	4199	4711	5519	5564	6792	7572	7593	9757	10724	23321	23522	25898	29015	51361	64116	80095	90627	339290
165	Early_Response_ER.Neg_27_JAMA.2011_PMID.21558518	Median Expression	PMID.21558518	309	493	874	3204	3757	4968	6093	6434	6447	6990	7094	7586	8989	9829	10489	11022	55578	55813	57332	79663	79932	83696
166	EMT_DOWN_Weingberg_PNAS.2010_PMID.20713713	Median Expression	PMID.20713713	220	247	288	306	624	638	667	760	768	816	894	999	1001	1040	1159	1308	1474	1525	1594	1824	1830	1839	1875	1952	1992	2041	2196	2261	2263	2707	2774	3485	3553	3557	3566	3606	3664	3691	3714	3728	3775	3852	3854	3861	3866	3868
167	EMT_UP_Weinberg_PNAS.2010_PMID.20713713	Median Expression	PMID.20713713	274	633	1000	1009	1031	1123	1278	1281	1290	1490	1634	1805	1893	2191	2192	2200	3037	3486	3487	3887	4052	4053	4311	4312	4313	4811	4919	4921	5118	5168	5376	5396	5552	5732	5806	5999	6695	6781	6876	6926	6935	7025	7041	7070	7130	7168
168	Endothelial_cells_MCP_PMID.31942075_PMID.31942077	Median Expression	PMID.31942075|PMID.31942077	94	8862	255877	654	660	1003	161198	79742	1906	64123	51705	90952	11082	79843	57520	64399	3791	22915	79812	80177	54873	375033	5228	5362	5787	54538	8436	85358	126669	7010	7075	79674	7450
169	Endothelial_Normal_EC_high_Angiogenesis_2014_PMID.24257808	Median Expression	PMID.24257808	3206	6387	3225	3223	609	348980	580	2045	121355	10251	23474	388799	5997	10024	259266	113115	5347	11065	22974	701
170	Endothelial_Tumor_EC_high_Angiogenesis_2014_PMID.24257808	Median Expression	PMID.24257808	80710	115207	83938	152519	221935	84858	7058	11318	1269	1191	148979	134111	6279	134147	93965	153572	339983	9244	222826	643037
171	Epithelial_Tubule_Formation_J.Pathol.2017_PMID.27861902	Median Expression	PMID.27861902	18	10965	8540	221079	415	22809	56905	57020	100128569	492311	158067	8535	56267	388389	347475	999	80321	54102	78989	1345	1371	1429	56521	83544	1997	157697	23359	51439	286151	26272	2247	161835	2498	114805	2697	55830	2770	2878	2892	2922	653238	4670	57594	51478	8100	3696
172	Excellent_Pathologic_Response_ER.Neg_55_JAMA.2011_PMID.21558518	Median Expression	PMID.21558518	493	659	1176	1374	1580	2056	2161	2280	2814	2907	3007	3221	3588	3655	4758	4800	5528	5639	5796	6396	6595	6892	7010	8161	8630	8672	9057	9522	9531	9887	10948	11059	11223	11231	11234	11342	22838	22864	23268	23354	23466	26298	26960	54463	54797	54800
173	Excellent_Pathologic_Response_ER.Pos_39_JAMA.2011_PMID.21558518	Median Expression	PMID.21558518	175	637	671	1312	1820	2572	2650	3836	4205	4610	4668	5297	5465	6690	8462	8543	9475	9527	9675	9693	10042	10669	10884	22839	23245	23302	23357	29123	50717	54535	55003	55131	55905	79888	81493	117246	347240
174	EXTENDED_B_CELL_signatures_Garber_Cell.Mol.Gastroenterol.Hepatol.2017_PMID.28508029	Median Expression	PMID.28508029	3899	65069	10409	695	66033	201895	934	100133941	972	972	973	26047	51523	378885	9214	84824	23062	3119	3126	23231	4067	4082	55846	256236	5336	5777	10509	51092	6643
175	Extensive_Residual_Diesase_ER.Neg_54_JAMA.2011_PMID.21558518	Median Expression	PMID.21558518	587	933	2348	3356	3691	4325	4666	4686	4781	5733	6560	6594	6964	7027	7047	7171	7407	7511	8225	8292	8555	8908	9278	9278	9749	10111	10144	10565	10622	22891	22897	22993	23466	23625	26073	55357	55486	55621	55847	57154	64109	79583	80143	83941	83941	91683
176	Extensive_Residual_Diesase_ER.Pos_73_JAMA.2011_PMID.21558518	Median Expression	PMID.21558518	90806	29083	64897	11043	79805	57180	23589	51397	27440	55966	6988	89910	2009	8658	79065	4146	54494	64172	831	55109	6019	3092	1593	9972	4889	8266	3762	23	7922	9477	22929	10513	27018	23264	5281	6596	5594	51193	10844	490	55638	3572	9813	1387	64750	688
177	FGFR4_Induced_JCI.2020_PMID.32573490	Median Expression	PMID.32573490	4233	5578	2202	1572	92196	55076	2919	5896	22822	26047	26353	4248	150365	64116	4624	1769	301	6590	11254	2213	2034	137902	85320	6004	51454	6523	4256	2786	153571	57214	5653	202299	8287	152789	55790	399474	5581	23208	3912	5320	6469	79057	1101	135250	80328	10331
178	FGFR4_Repressed_JCI.2020_PMID.32573490	Median Expression	PMID.32573490	339263	50804	11037	4897	93589	8743	646962	90634	596	441631	481	24	6585	115290	4065	158471	430	26137	26249	3553	1080	3127	26999	2201	10002	145773	50940	56969	100287465	54440	151009	2737	8843	79841	55698	5915	80206	3755	54800	51279	2690	136306	10481	83938	5816	57451
179	Fibrinogen_Cluster_BMC.Med.Genomics.2011_PMID.21214954	Median Expression	PMID.21214954	1823	8796	10637	8431	1644	6442	4878	27178	5126	10850	4014	3849	1828	3858	796	54857	9982	3860	4653	3757	11005	2266	2244	2267
180	Fibroblast_Cluster_BMC.Med.Genomics.2011_PMID.21214954	Median Expression	PMID.21214954	79776	10631	4675	9891	7043	4330	9902	4035	4681	3912	3671	6424	54587	8483	8038	50507	23414	79953	9358	1311	25903	30008	5176	1634	11167	1809	1513	5157	10418	4016	83468	165	5654	51339	25878	7058	1290	1293	6678	1281	1278	1009	2200	1462	22795	1289
181	Fibroblasts_MCP_PMID.31942075_PMID.31942077	Median Expression	PMID.31942075|PMID.31942077	1277	1281	1291	1292	1634	26585	25891	6876
182	Fibromatosis_Lab.Invest.2008_PMID.18414401	Median Expression	PMID.18414401	10398	2736	2199	10154	1831	9315	131578	5157	9510	2535	22982	6382	5358	23452	23493	1902	2331	1893	1490	6281	3479	91851	395	633	1806	8910	1604	4060	9590	11015	1303	5549	1809	1909	2934	8974	4969	1803	79822	127435	10418	624	2006	2615	11346	23266
183	fMaSC.refined1_PMID.25575446	Median Expression	PMID.25575446	1824	2001	3696	3815	1410	6422	419	2568	7368	53335	81706	57348	80975	135112	25928	131096	29970
184	fMaSC_Metab_CellRep.2018_PMID.30089273	Median Expression	PMID.30089273	2023	5315	3939	2171	2875	29968	3027	38	39	3033
185	fMaSC_Metab8_CellRep.2018_PMID.30089273	Median Expression	PMID.30089273	38	39	47	48	50	1891	2023	2171	2182	2597	2805	2806	2875	3098	3099	3417	3417	3418	3939	3945	4190	4191	4967	5106	5165	5211	5214	5230	5236	5238	5315	5723	6120	6513	6515	6517	6566	6567	6576	7167	9123	9194	23657	26227	29968	57546
186	fMaSC_Signature_CellRep.2018_PMID.30089273	Median Expression	PMID.30089273	100287932	57556	113880	154899	220064	83754	51644	51137	440026	285527	133746	338402	49858	55859	23019	80792	84916	10606	51645	90861	9861	80036	893	27230	51072	348995	8766	643836	136319	219404	9977	8697	202	142	207	230	309	328	347	353	377	397	444	471	501	509
187	FOS_JUN_Cluster_BMC.Med.Genomics.2011_PMID.21214954	Median Expression	PMID.21214954	2669	3164	467	9592	3726	3725	2353	1843	7538	2354	1958	3491	1959	10365	23645	1960
188	FOXC1_Hair_Follicles_Wang_SCIENCE.2016_P30C.LO.vs.WT_Negative_PMID.26912704	Median Expression	PMID.26912704	60	286	360	489	627	650	654	775	810	960	1285	1407	1611	1948	2246	2674	2762	3486	3491	3694	3899	4008	4643	4772	4803	4862	4897	5055	5212	5523	5618	5764	5791	5820	6092	6095	6274	6532	6533	7021	7091	7704	8796	8821	8853	9333
189	FOXC1_Hair_Follicles_Wang_SCIENCE.2016_P30C.LO.vs.WT_Positive_PMID.26912704	Median Expression	PMID.26912704	51141	2697	3371	79365	3006	54498	144165	771	9429	25849	63027	22903	7941	3084	79660	5270	1075	284379	25891	8671	12
190	GATA3.induced.genes_JCO.2006_PMID.16505416	Median Expression	PMID.16505416	644189	100133941	445347	100506492	339287	283120	401474	222171	171177	29028	93210	201266	266977	64834	253190	11343	149563	132299	163732	85477	58476	114990	144501	440335	140576	128434	80004	160313	120224	100131187	51755	23555	27237	124976	123036	400451	199974	127281	124220	57761	84299	64114	83541	126695	84953	26509
191	GATA3.induced.genes_Oncogene.2004_PMID.15361840	Median Expression	PMID.15361840	7031	7033	10974	5349	3855	3898	25825	114569	6282	7037
192	GENE_PANEL_TRUSEQ_40_ILLUMINA	Median Expression	PUBLIC-No PMID	25	207	238	324	472	673	999	1029	1436	1499	1956	2064	2066	55294	2260	2263	2261	2322	2767	2776	2778	6927	3265	3417	3717	3718	3791	3815	3845	4233	4292	4352	4851	4869	4893	5156	5979	5290	5728	5781	5925	4089	6598	6608	6714	6794
193	GENE_PANEL_UNCSEQ_7.1_Oncologist.2018_PMID.29158372	Median Expression	PMID.29158372	2078	25	3717	613	6098	672	675	7113	5159	6794	4916	4087	1021	27	2066	139285	5079	6925	862	5927	2776	596	7248	472	4524	4853	3845	1387	861	2044	5727	253260	545	58508	868	5789	208	26038	4893	6331	1030	2977	4851	2321	4170	8085
194	Glycolysis_Signature_BMC.Med.2009_PMID.19291283	Median Expression	PMID.19291283	2023	2597	2821	5214	5315
195	GO_DOWN_with_SOX10_OE_Cell.Rep.2015_PMID.26365194	Median Expression	PMID.26365194	111	113	136	146	154	165	203	218	220	239	249	271	284	290	301	306	316	317	330	332	367	374	397	445	467	479	493	501	558	571	575	595	602	610	637	646	649	650	651	652	683	687	699	701	710	715
196	GO_UP_with_SOX10_OE_Cell.Rep.2015_PMID.26365194	Median Expression	PMID.26365194	2	12	21	97	98	104	114	115	185	212	215	226	273	308	309	313	333	358	378	473	477	482	489	537	573	622	636	664	671	686	720	755	765	770	771	786	817	858	859	901	928	961	973	975	1032	1114
197	HCK_Breast.Cancer.Research.2008_PMID.19272155	Median Expression	PMID.19272155	64231	11309	51338	7940	199	7305	1794	2207	6039	9056	4332	4688	713	7805	10437	22797	9332	3903	942	3689	3055	712	1230
198	HER1_Cluster1_BMC.Genomics.2007_PMID.17663798	Median Expression	PMID.17663798	93436	10963	56926	84926	80273	51537	2193	79174	83858	7706	5496	6449	9684	1482	790	55703	56342	219	8704	9219	51083	7378	10528	55412	5271	54919	55210	10771	55131	10452	55646	140707
199	HER1_Cluster2_BMC.Genomics.2007_PMID.17663798	Median Expression	PMID.17663798	705	898	1678	6632	7804	9718	9791	10328	10785	22827	23246	23413	25902	26233	29078	51236	51373	55759	55975	56942	57486	60386	65265	79080	79581	83879	192111
200	HER1_Cluster3_BMC.Genomics.2007_PMID.17663798	Median Expression	PMID.17663798	285381	152559	205327	246243	87178	29979	134218	64853	115416	11260	128061	59345	51605	148867	23590	81929	79892	85476	57103	151195	25996	27292	55798	58478	29115	3836	4733	1977	7884	28512	79029	64318	84955	55299	1039	84259	10054	6059	7533	51096	54534	2618	8894	9521	81614	84641
201	HER2_AMPLIFIED_PerouLab_HER2_Amplicon_BMC_Med_Genomics_2011_PMID.21214954	Median Expression	PMID.21214954	5409	8557	7703	8396	54883	5691	3927	10948	55876	22794	147179	9862	5709	2886	2064	5469	6143	5914	9349
202	HGF_down_BCR.2013_PMID.24025166	Median Expression	PMID.24025166	9877	10207	23524	8936	204801	7351	914	80303	55666	29798	26054	55243	9589	9521	3181	4084	9857	115908	8368	55237	3778	3053	92840	2357	89866	8366	152641	3203	135250	8359	4185	923	9863	389136	1133	8631	388341	54360	8360	83872	1816	5332	136306	3270	84699	23636
203	HGF_up_BCR.2013_PMID.24025166	Median Expression	PMID.24025166	94081	1795	284325	2651	123624	582	118429	7067	285505	649	79879	203102	56479	93349	374768	254531	9659	57654	283767	362	7297	23114	200734	90204	286527	65250	84902	6789	6289	57121	114793	123855	128637	4522	3783
204	High_In_No_Response_MCP_TLS_Melanoma_PMID.31942075	Median Expression	PMID.31942075	51129	7079	80760	4017	5046	5055	374	3451	5212	347	8534	133	1917	79884	7056	5522	8862	57722	147495	6098	27295	4099	8515	154664	2260	27237	63982	79054	374946	84929	148281	200162	6620	5009	114788	23743	7087	89886	1770	55511
205	Histological_Grade_J.Pathol.2017_PMID.27861902	Median Expression	PMID.27861902	262	9212	119032	79000	84733	991	993	8318	1058	55839	1111	27161	113115	8833	83903	55355	56888	10112	11004	79083	64151	23397	115677	4998	5347	246243	6897	23371	1678	22974	84790
206	HISTONE_BMC.Med.Genomics.2011_PMID.21214954	Median Expression	PMID.21214954	8969	3012	8334	8347	85236	3006	8346	3017	8344	8343	8351	8348	8355	92815	3018	8358
207	HouseKeeping_Genome.Biol.2004_PMID.15287981	Median Expression	PMID.15287981	60	9801	5704	6175	10291
208	HRneg.Tneg_14.Genes_BCR.2010_PMID.20946665	Median Expression	PMID.20946665	10563	53405	5999	6234	64864	23265	1404	7551	10214	3268	79057	28	5657	4146
209	HS_Green1_BMC.Med.Genomics.2011_PMID.21214954	Median Expression	PMID.21214954	10002	10023	1003	10039	10053	10057	10063	10079	10087	1009	10099	10102	10103	10106	10111	10127	10140	10161	10169	10175	10180	10181	10186	10193	10202	10206	10207	10217	1022	10224	10229	10234	10241	10244	10252	10265	10268	1027	10272	10284	10296	10307	10309	10324	10329	10351
210	HS_Green10_BMC.Med.Genomics.2011_PMID.21214954	Median Expression	PMID.21214954	1000	1001	10024	10036	10112	10212	10221	1033	10360	10383	10403	10460	10535	1058	10615	1062	1063	10635	10682	10721	10733	10874	10926	10950	11004	11065	1111	11130	1116	11182	11332	1159	1164	124222	126321	1299	133	1356	1364	140459	1468	1503	1515	1789	1852	1869
211	HS_Green11_BMC.Med.Genomics.2011_PMID.21214954	Median Expression	PMID.21214954	10001	10049	10092	10099	10105	10150	10159	10175	10179	10190	102	10203	1022	10236	10241	10243	10247	10276	10286	10289	10291	10294	10311	10314	10325	10370	10404	10419	10431	10434	10438	10447	10449	10455	10463	10473	10483	10548	10549	10550	10552	10558	10565	10575	10576	10605
212	HS_Green12_BMC.Med.Genomics.2011_PMID.21214954	Median Expression	PMID.21214954	1001	10124	10200	10225	10278	1031	10331	10351	10397	1043	10462	10477	10537	10562	10563	10644	10659	10752	10810	10938	11012	11096	1116	11184	11254	116984	1183	1193	1231	1236	1259	126	1264	1299	1380	1381	140578	1410	1459	1475	154	1573	1593	1672	1806	1825
213	HS_Green13_BMC.Med.Genomics.2011_PMID.21214954	Median Expression	PMID.21214954	10025	10147	10157	10158	10160	10180	10181	10207	10250	10256	1028	10307	10336	10395	10401	10406	10425	10443	10446	10472	10482	10486	1052	10520	10521	10610	10647	10691	10725	10742	10765	10766	10848	10858	10868	10873	10927	10966	11000	1101	11030	1108	11122	11129	11133	11147
214	HS_Green14_BMC.Med.Genomics.2011_PMID.21214954	Median Expression	PMID.21214954	1003	10161	10186	10203	10268	10351	1036	10365	10395	1043	10462	1050	10544	10628	10788	10875	11186	1149	115207	124	1240	125	1306	1318	1359	1439	1512	1524	1601	1675	1776	1805	1806	1901	1910	1959	199	2	2004	2022	2123	2124	2149	216	2167	217
215	HS_Green15_BMC.Med.Genomics.2011_PMID.21214954	Median Expression	PMID.21214954	10001	10010	10093	10162	1018	102	10203	10243	1025	10280	10362	10398	10419	10516	10522	10533	10555	10558	10589	10672	10746	10773	10945	10959	10963	11100	11102	11135	11140	11156	11194	1121	11282	11316	11332	1173	1201	1209	1292	1316	1365	1366	1385	1397	1398	1509
216	HS_Green16_BMC.Med.Genomics.2011_PMID.21214954	Median Expression	PMID.21214954	10010	10051	10111	10161	10247	10299	10308	10388	10428	10464	10592	1060	10600	1062	10622	1063	10725	10735	10808	10915	1105	11064	11168	11177	11179	11183	11215	1122	114882	114908	140609	140890	151987	1629	1657	178	1783	1832	196441	201134	2186	221037	221830	22841	23002	23049
217	HS_Green18_BMC.Med.Genomics.2011_PMID.21214954	Median Expression	PMID.21214954	10014	10125	10171	1027	10406	10486	10493	10609	10742	10884	10928	10998	1101	11012	112398	12	1280	1345	1360	140465	1471	1473	1659	18	1829	1952	2026	2036	2091	2099	2261	2263	23030	23158	2317	23239	23327	23362	23541	23624	23678	24139	24147	2523	26232	2625
218	HS_Green19_BMC.Med.Genomics.2011_PMID.21214954	Median Expression	PMID.21214954	10058	10637	10647	10850	11005	11272	11341	1280	1356	1358	1360	1361	1474	1644	1672	170680	1748	1823	1828	1830	2064	222663	2244	2266	2267	22843	23532	25770	25984	26239	27178	276	28513	2888	29106	29118	2940	29949	3006	3248	3757	3849	3858	3860	3929	4014
219	HS_Green2_BMC.Med.Genomics.2011_PMID.21214954	Median Expression	PMID.21214954	100	10006	10010	10015	10019	10026	10048	10049	10051	10054	10055	10059	10063	10072	10092	10094	10095	10096	10097	101	10109	10112	10125	10133	10138	10165	10175	10179	10184	10190	10198	102	10212	10213	10225	10237	10247	10248	10254	10261	10269	10274	10282	10284	10285	10286
220	HS_Green20_BMC.Med.Genomics.2011_PMID.21214954	Median Expression	PMID.21214954	10057	10096	10097	10109	10123	10288	10457	10561	10577	10630	10964	10993	11015	11021	11025	11274	113	1176	1200	1230	1277	1290	1300	1301	133	140	1474	1508	1509	1514	1601	1612	2054	2131	2207	2209	2212	22795	23129	2316	23213	23380	2359	23603	2512	2537
221	HS_Green21_BMC.Med.Genomics.2011_PMID.21214954	Median Expression	PMID.21214954	1001	10278	10279	10413	10562	10647	10769	11211	11252	11254	114908	1287	1298	1825	1830	1846	1848	2001	2104	2152	23650	23677	2568	25859	25928	25984	26289	26298	26751	2810	306	3158	3294	339479	351	3694	3852	3855	3861	3866	3872	390	3914	3977	4013	4070
222	HS_Green22_BMC.Med.Genomics.2011_PMID.21214954	Median Expression	PMID.21214954	10087	10098	10204	10725	10766	10927	10928	11057	1108	133619	146057	151987	152	1783	1788	1871	1981	1997	2058	219333	221692	22980	23099	23196	23197	23253	23451	23468	23476	25879	25897	26986	27333	2734	27340	2742	2771	2801	2885	29123	2932	2957	29855	3070	3146	3149
223	HS_Green23_BMC.Med.Genomics.2011_PMID.21214954	Median Expression	PMID.21214954	3006	3012	3017	8334	8343	8344	8346	8347	8351	85236
224	HS_Green24_BMC.Med.Genomics.2011_PMID.21214954	Median Expression	PMID.21214954	10043	10126	10200	10291	10478	10521	10762	11078	11135	11252	1312	1454	158	162	1652	2033	23112	23151	23464	23481	23543	23654	23760	23774	23786	2547	25771	25776	25793	25807	25809	25813	25814	25828	25829	26088	26286	2678	27349	27352	27440	2952	29796	3985	4174	4282
225	HS_Green25_BMC.Med.Genomics.2011_PMID.21214954	Median Expression	PMID.21214954	10103	10451	10551	10647	10974	1846	2203	23158	2625	27324	3169	367	4250	5304	57758	7021	7031	7033	7494	771	7802	79083	79838	9
226	HS_Green3_BMC.Med.Genomics.2011_PMID.21214954	Median Expression	PMID.21214954	10009	10013	1002	10021	10022	10024	1004	10044	10045	10046	10047	10050	10052	10058	1006	10060	1007	10075	10076	10077	1008	10083	10089	1010	10107	10110	10114	1013	10136	1014	10141	10149	10157	1016	10164	10168	1017	10170	1018	10188	1021	10214	10219	10220	10223	10232
227	HS_Green4_BMC.Med.Genomics.2011_PMID.21214954	Median Expression	PMID.21214954	10000	1001	1003	1009	10123	10124	10144	10157	10179	10184	10186	10205	10231	10234	10252	10253	10278	10279	1028	10351	1036	10391	10398	104	10404	10410	10417	10418	10447	10457	10468	10477	10479	1051	10516	10536	10562	10602	10630	10631	10644	10656	10659	1066	10699	10752
228	HS_Green5_BMC.Med.Genomics.2011_PMID.21214954	Median Expression	PMID.21214954	10024	10036	10043	10048	10053	10061	10066	10067	10072	10084	10093	10101	10105	10112	10113	10121	10126	10134	10139	10155	10158	10162	10166	10169	1019	10195	10197	1020	10204	10211	10212	10213	10226	10227	10232	10233	10237	10238	10245	10248	1025	10262	10263	10265	10276	10277
229	HS_Green6_BMC.Med.Genomics.2011_PMID.21214954	Median Expression	PMID.21214954	100	10019	10062	101	10125	10133	10148	10235	10261	10288	10320	10346	10379	10384	10409	10410	1043	10457	10462	10507	10537	10561	10563	10578	10659	1075	10791	10855	10859	10875	10964	11006	11025	11040	11118	11119	11184	11262	11309	11314	11326	1230	1231	1236	1380	140885
230	HS_Green7_BMC.Med.Genomics.2011_PMID.21214954	Median Expression	PMID.21214954	10016	10026	10054	10069	10073	10094	10116	10128	10142	10153	10159	10166	10190	10196	10206	10210	10224	10236	1024	10240	10256	10269	10274	10279	10282	10285	10286	10289	10314	10330	10363	10412	10424	10426	10427	10438	10443	10447	10451	10463	10464	10473	10478	10529	10542	10551
231	HS_Green8_BMC.Med.Genomics.2011_PMID.21214954	Median Expression	PMID.21214954	10098	10103	10140	10202	10234	10309	10321	10362	10451	10455	1047	10512	10551	10560	10585	10612	10614	10647	1066	10742	10916	10974	11001	1101	11098	11122	11145	11221	11226	112399	1124	11257	114899	1153	1154	1201	1287	1311	1359	1362	1363	1374	138162	1384	1397	1408
232	HS_Green9_BMC.Med.Genomics.2011_PMID.21214954	Median Expression	PMID.21214954	1009	10154	10234	10409	10417	10418	10484	10536	10631	10699	11031	11117	11167	114899	1277	1278	1281	1289	1290	1292	1293	1300	1301	1311	1462	1490	1513	1604	1634	165	1809	1833	1909	2162	2191	2199	2200	22795	22846	2295	23022	23213	23414	23452	23601	23670
233	HS_Red1_BMC.Med.Genomics.2011_PMID.21214954	Median Expression	PMID.21214954	100	10006	1001	10010	10020	10024	10036	10051	10054	10059	10092	10095	10096	10097	10109	10112	10123	10125	10133	10148	10149	10158	10165	10200	10204	10205	10212	10213	10225	10232	10235	10237	1024	10247	10248	10261	10287	10288	1029	10294	10308	1031	10320	10321	10328	1033
234	HS_Red10_BMC.Med.Genomics.2011_PMID.21214954	Median Expression	PMID.21214954	10003	1003	10156	10186	10203	10252	10268	1031	10351	1036	10365	10400	1050	10516	10580	10628	10752	10826	10894	10974	11067	11170	11343	1149	115207	1160	116496	1193	124	125	126	13	1346	1368	1410	1475	1675	1805	1843	1848	187	1901	1910	1958	1959	2078
235	HS_Red11_BMC.Med.Genomics.2011_PMID.21214954	Median Expression	PMID.21214954	10016	10057	10079	10140	10153	10180	10224	10240	10299	10307	10308	10336	10363	10388	10401	10406	10428	10443	10451	10464	1047	10472	10486	10513	10520	10521	10551	10559	10560	1060	1070	10724	10735	10769	10782	10795	10845	10884	10912	10915	10927	1105	11064	11127	11129	11133
236	HS_Red12_BMC.Med.Genomics.2011_PMID.21214954	Median Expression	PMID.21214954	1001	10103	10124	10158	10169	10200	10202	10278	10309	10321	10327	1039	1047	10519	10579	10647	10653	10736	10948	10970	11014	11094	11163	11221	11226	11240	11252	11275	11320	114908	1152	1159	1312	1317	133	1362	1384	1397	1428	1509	1573	1611	1622	1627	1672	171546
237	HS_Red13_BMC.Med.Genomics.2011_PMID.21214954	Median Expression	PMID.21214954	1000	10000	1001	10046	10061	101	10112	10164	1021	10232	10262	1029	10389	10403	10452	10492	1051	10523	10537	1054	1058	10591	1062	10623	1063	10635	10650	10691	10712	10721	1075	10755	10762	10785	10926	10928	10939	10946	10969	10981	11004	11015	1104	11060	11065	11104
238	HS_Red14_BMC.Med.Genomics.2011_PMID.21214954	Median Expression	PMID.21214954	10057	10079	10202	10243	10247	10267	10397	10420	10424	10434	10451	1052	10529	10565	10609	10885	10916	10974	10987	10994	10998	11001	11145	11236	1164	12	1280	1345	1365	1537	157680	1580	1733	178	1811	1847	191	1917	1936	2013	2194	2217	224	2261	22827	22882
239	HS_Red15_BMC.Med.Genomics.2011_PMID.21214954	Median Expression	PMID.21214954	10067	10158	10228	10262	103	10309	10370	10451	10456	10472	10623	10638	10654	10669	10712	10765	10899	1101	11243	11266	1130	11311	1196	1314	1382	142	1528	153	154796	159	1939	1942	1945	1950	1960	1997	2029	2052	2053	2058	2099	2224	223	2239	2263	2271
240	HS_Red16_BMC.Med.Genomics.2011_PMID.21214954	Median Expression	PMID.21214954	10379	10410	10561	10964	11274	23586	24138	2537	3429	3431	3434	3437	3627	3665	3959	4061	4599	4600	4938	4939	4940	51191	5359	54739	54809	55008	55601	5696	5698	6373	64108	6772	684	6890	79132	8519	91543	9246	9636
241	HS_Red17_BMC.Med.Genomics.2011_PMID.21214954	Median Expression	PMID.21214954	10048	10049	10093	10099	10105	10114	10139	10146	10150	10154	10159	102	10203	10236	10277	10280	10294	1030	10370	10419	10431	10484	10499	10526	10533	10534	10552	10558	10576	10589	10613	10672	10746	10773	10818	10857	10924	10933	10945	10959	10963	11011	11051	11080	11102	11104
242	HS_Red18_BMC.Med.Genomics.2011_PMID.21214954	Median Expression	PMID.21214954	1001	10124	10252	10253	10321	10351	10406	10562	10563	10633	10647	10763	10826	11001	1101	11095	11096	1113	1116	11188	11197	11211	11252	11341	12	1264	1288	1308	135138	1381	1620	1672	1734	1811	1848	1908	1952	1958	1960	2069	213	2135	2152	2244	22977	23224
243	HS_Red19_BMC.Med.Genomics.2011_PMID.21214954	Median Expression	PMID.21214954	1005	10103	10125	10158	10312	10406	10439	1048	10553	10742	10884	10916	10923	11001	1101	11098	11122	1114	11153	11277	114884	115123	1152	12	1345	1360	1471	1473	1548	1555	1602	1643	169611	1796	1846	185	1893	1917	1952	2026	203	2099	21	22858	22875	22930
244	HS_Red2_BMC.Med.Genomics.2011_PMID.21214954	Median Expression	PMID.21214954	10	10026	10049	10053	10063	10067	10085	10099	10103	10111	10128	10140	10142	10159	10161	10175	10181	10190	10193	10202	10203	10206	10207	10210	10217	1022	10224	10229	10234	10243	10244	10247	10265	10269	1027	10276	10282	10284	10286	10289	10296	10309	10314	10321	10324	10325
245	HS_Red20_BMC.Med.Genomics.2011_PMID.21214954	Median Expression	PMID.21214954	10170	10235	10346	10384	1043	10462	10507	10537	10563	10875	11040	11064	11184	113791	120	1236	125	1439	1520	1521	1522	1880	2124	2213	221692	2219	22861	22900	23046	2326	23495	240	2532	25816	25849	2633	27074	27240	27299	27334	2811	2833	2841	28793	29802	29909
246	HS_Red21_BMC.Med.Genomics.2011_PMID.21214954	Median Expression	PMID.21214954	1009	10234	10418	10699	11031	11081	114899	1278	1281	1289	1290	1300	1301	1311	1462	1474	1513	1592	1604	1634	165	1809	1833	2162	2191	2199	2200	22795	23213	23414	25878	2589	25903	25907	27122	2825	2922	29995	3624	3956	4016	4060	4148	4237	4313	4319
247	HS_Red22_BMC.Med.Genomics.2011_PMID.21214954	Median Expression	PMID.21214954	10006	10094	10096	10116	10175	10179	10190	10241	10269	10282	10285	10286	10289	10308	10330	10393	10427	10438	10440	10447	10463	10466	10549	10600	10632	10651	10671	10797	10920	10924	10933	10952	10971	10988	11014	11017	11052	11154	11171	11235	11260	112611	113251	11340	11342	1147
248	HS_Red23_BMC.Med.Genomics.2011_PMID.21214954	Median Expression	PMID.21214954	10024	10036	10051	10112	10198	10212	1033	10403	10460	10535	1058	10592	10615	1062	1063	10635	10682	10721	10733	11004	11065	11073	11113	11130	1164	1515	1719	1786	1789	1869	1894	1951	2125	2146	2189	2232	22974	23306	23397	23649	24137	259266	26150	26255	26586	27338
249	HS_Red24_BMC.Med.Genomics.2011_PMID.21214954	Median Expression	PMID.21214954	10221	10365	125	1316	1360	1490	150094	1675	1839	1843	1844	185	1958	1959	1960	2167	2273	2353	2354	2532	2669	3036	3039	3043	3164	3491	3569	3725	3726	388	3952	4023	467	4929	5054	5346	5743	5997	6347	6351	6401	6446	6515	6781	7538	7832
250	HS_Red25_BMC.Med.Genomics.2011_PMID.21214954	Median Expression	PMID.21214954	10057	10103	10140	10202	10237	10238	10241	10265	10476	1048	10513	10551	10610	10753	1087	10948	11011	11143	11232	11267	11325	117246	1213	124583	147179	1655	1728	2064	2186	2203	220594	2258	22794	22834	2287	25764	25926	26115	26154	2650	27075	27092	27324	2817	2886	29095
251	HS_Red3_BMC.Med.Genomics.2011_PMID.21214954	Median Expression	PMID.21214954	10000	1003	1009	10124	10144	10157	10161	10180	10186	10202	10218	10231	10234	10252	10253	1028	10319	10351	1036	10365	10391	10395	10398	10399	10411	10417	10418	10462	10468	10477	10484	10512	10516	1052	10562	10563	10580	10628	10631	10647	10659	1066	10687	10699	10742	10752
252	HS_Red4_BMC.Med.Genomics.2011_PMID.21214954	Median Expression	PMID.21214954	10019	10062	10219	10225	10261	10288	10346	10379	10384	10396	1043	10462	1050	10507	10537	10561	10563	10577	10578	10663	1075	10791	10863	10875	10964	11006	11040	11118	1118	11182	11184	11262	11274	11326	116984	1230	1231	1236	135	1380	1436	1438	1439	1475	1512	1514
253	HS_Red5_BMC.Med.Genomics.2011_PMID.21214954	Median Expression	PMID.21214954	10	1000	10002	10018	1002	10021	10044	10045	10047	1005	10050	10052	1007	10076	10077	1008	10083	10089	10098	1010	10107	10110	1013	10131	10136	1014	10147	10156	1016	10164	10174	1018	10181	10188	10202	1021	10215	10220	10223	10242	10246	10249	10255	10267	10268	10272
254	HS_Red6_BMC.Med.Genomics.2011_PMID.21214954	Median Expression	PMID.21214954	10038	10048	10051	10055	10059	10063	10072	10084	10093	10094	10105	10112	10113	10121	10128	10131	10134	10139	10155	10165	10175	1019	10195	10196	10197	1020	10212	10213	1022	10221	10237	10238	10245	10247	10248	10267	10276	10285	10294	10300	10327	10328	1033	10376	10383	10393
255	HS_Red8_BMC.Med.Genomics.2011_PMID.21214954	Median Expression	PMID.21214954	1001	10160	10205	10232	10253	10278	10279	10290	10397	10413	10426	10514	10562	10568	10644	10656	10725	10763	10874	10950	10966	11012	11013	1116	11197	11202	11237	11240	11254	11272	11341	1259	1280	1298	1299	1308	1356	136	1381	140578	1410	1448	1465	1466	1515	1672
256	HS_Red9_BMC.Med.Genomics.2011_PMID.21214954	Median Expression	PMID.21214954	10001	10014	10025	10043	10053	10098	10103	10105	10126	10127	10134	10155	10162	10174	1020	10202	10211	10227	10243	1025	10256	10263	10265	10267	10268	10277	10295	10336	10362	10419	10446	10451	10455	10458	10482	10521	10522	10548	10551	10560	10576	10608	10610	10611	10612	10647
257	IgG_Breast.Cancer.Research.2008_PMID.19272155	Median Expression	PMID.19272155	391427	96610	339562	28902	651961	90925	651629	91353	28299	28461	5450	28831	91316	3538	28793	3514	28815	3500	3507	28786	3495	3493	3535	3492	3537	652745
258	IGG_Cluster_BMC.Med.Genomics.2011_PMID.21214954	Median Expression	PMID.21214954	939	3561	973	11040	5450	3514	28793	3535	3512	608	4917	3576	3107	54900
259	IMMUNE_Bindea_Cell_aDC_Immunity.2013_PMID.24138885	Median Expression	PMID.24138885	3620	4940	6346	10148	27074
260	IMMUNE_Bindea_Cell_B_cells_Immunity.2013_PMID.24138885	Median Expression	PMID.24138885	608	640	930	931	971	1380	1690	1838	2731	2788	3112	3117	3493	3500	3507	3514	3535	4208	5244	5368	6328	6565	6689	8115	9834	10803	29064	29760	53335	55278	57553	60468	79368	114884
261	IMMUNE_Bindea_Cell_CD8_T_cells_Immunity.2013_PMID.24138885	Median Expression	PMID.24138885	166	321	678	687	819	925	926	1647	1831	2323	3004	3337	5196	5504	5551	5935	6432	6844	6903	6935	7536	7570	7644	7994	9194	11322	23060	23484	29777	51275	54923	55602	55615	55623	79441	91304
262	IMMUNE_Bindea_Cell_Cytotoxic_cells_Immunity.2013_PMID.24138885	Median Expression	PMID.24138885	321	864	1521	1844	2999	3001	3820	3824	4818	6095	7704	10578	22914	51348	59307	80833	339005
263	IMMUNE_Bindea_Cell_DC_Immunity.2013_PMID.24138885	Median Expression	PMID.24138885	3290	4881	6357	6361	6367	8495	30835
264	IMMUNE_Bindea_Cell_Eosinophils_Immunity.2013_PMID.24138885	Median Expression	PMID.24138885	32	847	1178	1232	2015	2581	3006	3280	3568	3757	6036	6477	7050	7057	7060	8277	8867	9398	9920	11057	11251	22905	23223	25976	51531	55512	55758	57105	59340	91355	728965	80022
265	IMMUNE_Bindea_Cell_Lymph_vessels_Immunity.2013_PMID.24138885	Median Expression	PMID.24138885	2277	7424	10630
266	IMMUNE_Bindea_Cell_Macrophages_Immunity.2013_PMID.24138885	Median Expression	PMID.24138885	348	586	950	968	1116	1118	1296	1536	2012	2230	2239	2335	2760	3730	4199	4481	5730	6354	6374	6447	6819	8685	8832	9332	10533	23601	26064	26577	51338	58511	81035	259230	1513
267	IMMUNE_Bindea_Cell_Mast_cells_Immunity.2013_PMID.24138885	Median Expression	PMID.24138885	116	190	794	946	1088	1215	1359	1511	1991	2206	2624	3067	3248	3815	4013	4353	5553	5742	6571	6886	7177	7857	10257	27306	57419	57460	64499	79083	339524	4129
268	IMMUNE_Bindea_Cell_Neutrophils_Immunity.2013_PMID.24138885	Median Expression	PMID.24138885	249	683	1084	1441	2204	2215	2357	2358	3577	3579	3772	4051	4311	5142	6283	6583	8291	8347	8778	8794	8972	9586	9895	10288	10855	22918	50486	51312	55313	55350	83716
269	IMMUNE_Bindea_Cell_NK_CD56bright_cells_Immunity.2013_PMID.24138885	Median Expression	PMID.24138885	758	1846	2302	6236	6375	8398	8567	10299	57876	83696	254531
270	IMMUNE_Bindea_Cell_NK_CD56dim_cells_Immunity.2013_PMID.24138885	Median Expression	PMID.24138885	2975	3002	3804	3806	3807	3810	3811	3812	3813	10417	50615	53637	55020	56937	115653
271	IMMUNE_Bindea_Cell_NK_cells_Immunity.2013_PMID.24138885	Median Expression	PMID.24138885	104	219	323	596	988	2527	2574	2778	3488	5710	6375	6693	6846	6915	7755	8572	8817	8888	9437	9902	11155	22924	25959	27308	51343	55503	55671	57716	64129	64225	64924	65988	79867	84436	259230	643313	730096
272	IMMUNE_Bindea_Cell_Normal_mucosa_Immunity.2013_PMID.24138885	Median Expression	PMID.24138885	72	125	857	1015	1048	1281	2192	2767	3488	3490	3910	3960	4256	4629	4638	4781	5349	6876	7103	7168	8404	8490	8613	8976	10551	51232	54474	55970	1634	800	715	9843
273	IMMUNE_Bindea_Cell_SW480_cancer_cells_Immunity.2013_PMID.24138885	Median Expression	PMID.24138885	595	652	655	1670	1917	2161	2248	2288	3481	3625	3691	3714	3852	3860	4237	4923	5127	5653	5947	6273	6274	6510	6535	7004	7447	10202	10763	10998	23650	25805	29984	54913	64220	78999	79058	89944	3205
274	IMMUNE_Bindea_Cell_T_cells_Immunity.2013_PMID.24138885	Median Expression	PMID.24138885	914	915	916	917	923	940	3932	4068	5588	6955	8631	9452	10225	28639	28755	50852	55340	64919	83988
275	IMMUNE_Bindea_Cell_T_helper_cells_Immunity.2013_PMID.24138885	Median Expression	PMID.24138885	940	987	1386	4676	5527	6117	6955	7332	8604	9452	9632	10538	10541	10730	10772	23015	25842	29851	55274	57122	63901	79009	79866	285527
276	IMMUNE_Bindea_Cell_Tcm_Immunity.2013_PMID.24138885	Median Expression	PMID.24138885	360	472	841	1540	1678	2533	3187	4214	4297	4747	4775	5108	6482	6638	7294	8287	8556	8675	8821	9057	9397	11278	22990	23059	23177	23348	55729	58487	80012	80342	85021	202134	246721	283970	441155	116828	27086	55269	84663
277	IMMUNE_Bindea_Cell_Tem_Immunity.2013_PMID.24138885	Median Expression	PMID.24138885	1231	2130	2313	4058	4210	4776	5616	6904	6955	7430	9779	10000	10521	27099	81544
278	IMMUNE_Bindea_Cell_TFH_Immunity.2013_PMID.24138885	Median Expression	PMID.24138885	643	753	1114	1117	3382	4086	4094	5783	6489	7253	8362	8645	8851	9760	10563	10585	23178	23462	27087	27347	54436	55423	56301	57496	57535	63892	92595	28986	4646	4647	5133	5816
279	IMMUNE_Bindea_Cell_Tgd_Immunity.2013_PMID.24138885	Median Expression	PMID.24138885	6964	6983	9638	10485	11126	445347
280	IMMUNE_Bindea_Cell_Th1_cells_Immunity.2013_PMID.24138885	Median Expression	PMID.24138885	323	347	684	952	970	1437	1493	1803	1839	1847	2678	3458	3595	4049	6351	6443	7804	8418	9143	9162	10079	10950	25975	27033	50616	54674	55816
281	IMMUNE_Bindea_Cell_Th17_cells_Immunity.2013_PMID.24138885	Median Expression	PMID.24138885	3605	6097	23765
282	IMMUNE_Bindea_Cell_Th2_cells_Immunity.2013_PMID.24138885	Median Expression	PMID.24138885	107	286	332	995	1063	1719	2625	2941	3070	3904	4087	4151	5251	5367	5740	6632	7813	8317	9645	10663	11169	23516	51474	54806	55247	55801	728210
283	Immune_High_In_Response_MCP_TLS_Melanoma_PMID.31942075	Median Expression	PMID.31942075	4283	2633	3001	915	3627	8115	973	9235	3620	3512	5450	6890	710	51237	3821	923	158471	3659	3458	5920	115361	10396	151888	3824	54900	83416	26279	8368	56145	56146	8395	55118	260436	3738	100423062	91319	389643
284	Immune_Hot_using_CD8_vs_Cold_PMID.31942071	Median Expression	PMID.31942071	4069	5552	962	51316	1075	9595	939	3123	3394	2533	2124	5880	6352	3122	3119	11151	3512	91353	951	3575	6039	4283	3117	27299	963	7805	2207	7852	3689	3059	2123	1520	5341	64092	6355	713	3587	51816	7351	3115	10875	712	2745	51338	241	11040
285	IMMUNE_PEREZ_14_JCO.2015_PMID.2560586	Median Expression	PMID.2560586	84632	120425	6366	1233	913	959	6387	2534	3112	3487	3394	5729	5734	81793
286	IMMUNE_PEREZ_87_JCO.2015_PMID.2560586	Median Expression	PMID.2560586	3635	729230	3575	3133	3689	3487	7454	10870	3071	7494	81793	6352	7133	3385	3821	4049	3458	4050	959	3394	7412	5729	5734	941	4068	54106	973	2833	313	695	9934	120425	1235	4069	4065	7852	3683	915	5788	976	3561	3766	3932	913	2534	11126
287	Immune_Suppression_Kardos_JCI.Insight.2016_PMID.27699256	Median Expression	PMID.27699256	29126	3620	356	1493	5133	3902	84868	80380	3586	7040	5743	4513
288	Immunosuppression_PMID.31942077	Median Expression	PMID.31942077	7043	6387	7040	3956
289	Inflammatory_Breast_Cancer_491_IBC_CCR.2013_PMID.23396049	Median Expression	PMID.23396049	1211	29960	6217	26986	10938	5042	5018	10109	55968	7375	6166	6631	11157	468	8662	7415	958	4141	3842	9489	55625	22978	10425	55027	11177	58517	64421	8202	79081	1901	8930	8837	5476	5467	5355	2058	51663	25915	9141	4521	10801	10791	23077	55803	4775	4242
290	Inflammatory_Breast_Cancer_491_nIBC_CCR.2013_PMID.23396049	Median Expression	PMID.23396049	2066	1301	56521	8614	4137	54829	4602	54463	2263	1746	5507	6424	57535	1047	131578	23362	79718	10234	4291	7042	1287	6566	4322	6662	18	10742	89927	4950	1266	4148	9410	3303	79901	129642	26053	7020	23158	2192	7358	4646	79006	23428	6038	5792	79603	6450
291	Inflammatory_Breast_Cancer_79_IBC_CCR.2013_PMID.23396049	Median Expression	PMID.23396049	29960	10938	10109	3842	9489	8930	5476	5467	25915	4521	10801	23077	4775	23210	84549	51663	51575	80155	6157	6432	79902	89845	51	4860	55884	100507192	9733	65125	971	1601	2348	6775	7184	8826	9833	6169	11322	5579	3626	4082	29123	5079	100290481	10964
292	Inflammatory_Breast_Cancer_79_nIBC_CCR.2013_PMID.23396049	Median Expression	PMID.23396049	8614	79718	7042	26053	821	1386	55786	57326	51133	9040	757	81619	60436	6670	5062	56993	10049	51626	1488	54499	538	1398	8453	8799	6259	2553	310	10295	64924	57117	71
293	Influenza_11genes_Metasignature_KHATRI_Immunity.2015_PMID.26682989	Median Expression	PMID.26682989	952	51191	55008	2537	64135	3959	4061	4599	64761	64108	81030
294	IntClust_Amplification.50.Better.than_Genome.Biol.2014_PMID.25164602	Median Expression	PMID.25164602	92105	28971	128061	79053	283219	8443	57558	64216	84284	51773	1207	6905	64801	9453	93210	55204	2064	4718	5058	9804	159	22796	3192	28957	25909	2271	6198	83932	2029	267002	170597	55127	80851	359948	9846	79894	51174	282679	7257	7163	55657	6894	23029	10806	116228	379004
295	IntClust_Amplification.50_Genome.Biol.2014_PMID.25164602	Median Expression	PMID.25164602	3169	2625	2064	93210	55388	22796	8872	11164	84072	128061	898	28971	27338	79053	64801	55204	80139	283219	92105	9453	9156	51097	6905	55127	5214	84451	170597	57558	64216	8443	7913	84886	51029	84318	22929	55003	219654	63933	9712	148789	84284	51256	145814	25909	55526	28957
296	IntClust_Deletion.50.Better.than_Genome.Biol.2014_PMID.25164602	Median Expression	PMID.25164602	65265	22827	84232	80728	1537	7553	51160	84948	23513	28991	78998	54512	81858	84988	65263	3297	8733	286077	2907	5747	22956	286075	8694	90990	26233	113655	7583	51337	79581	203054	22957	50626	79943	6132	23144	23246	7564	2738	9684	54108	26873	22958	55630	116447	83696	79792
297	IntClust_Deletion.50_Genome.Biol.2014_PMID.25164602	Median Expression	PMID.25164602	79083	135295	1058	7494	2296	22827	113130	7272	65265	319108	23246	157313	54681	55355	191590	23784	79581	1537	78998	23594	146923	84232	1153	4137	54512	149563	64284	122970	388	51364	440044	8140	8318	23513	90417	28991	65263	27161	400566	80728	51160	3297	29899	85004	7553	440567
298	Interferon_Breast.Cancer.Research.2008_PMID.19272155	Median Expression	PMID.19272155	91543	4940	10561	9636	55601	10964	2537	4599	3437	3429	3434	4938	4939
299	Interferon_Cluster_BMC.Med.Genomics.2011_PMID.21214954	Median Expression	PMID.21214954	55337	684	3431	64761	24138	4938	10379	11274	23586	4600	3429	4939	2537	3437	10964	10561	3434	9636	4599	91543	4940	55008	51191	55601	5359	9246	54809	64108	54739	9111	8519	10410	3669	5721	5720	3665
300	JANES_Oscillation_GDF11_TGFBR3_Nat.Cell.Biol.2014_PMID.24658685	Median Expression	PMID.24658685	11051	130535	987	5166	114041	400658	7287	146540	10220	373861	27086	84614	178	820	4803	8013	8997	353323	4831	1747	8284	219493	55611	2527	26517	11074	126626	50508	8471	388719	29923	50488	282763	5539	1193	8639	10861	55313	7045	1734	55512	3223	11036	26206	3801	57580
301	JANES_Oscillation_JUND_KRT5_Nat.Cell.Biol.2014_PMID.24658685	Median Expression	PMID.24658685	55352	81892	4694	23480	55505	9553	6902	51065	1938	6137	746	6227	6169	23625	1026	6235	6050	6277	1351	6923	3608	10974	8539	10476	3852	3336	514	4831	4082	3727	80198	6194	118487	220323	221	64982	519
302	Keller2012_CD10_Adam_PMID.25575446	Median Expression	PMID.25575446	810	3936	1308	54544	3861	9635	6698	374897	6273	9638	50805	388533	5307	54922	8626	9651	5646	284217	387914	4826	1464	8745	3038	80115	3552	27065	2026	56901	6513	51129	2878	9788	6704	118430	8140	1012	10630	5228	5210	133584	6622	353322	4094	54436	23767	6256
303	Knudsen_Neo_common_Clin.Cancer.Res.2014_PMID.25047707	Median Expression	PMID.25047707	7913	51053	81611	29127	4175	2146	26271	3925	10635	7153	1894	203068	3838	3148	3015	7272	4171	54677
304	Knudsen_Neo_ER_negative_Clin.Cancer.Res.2014_PMID.25047707	Median Expression	PMID.25047707	3608	7398	4172	6434	4436	6117	4712	55795	8516	4190	29115	26953	3843	5982	6427	11258	11073	4076	63933
305	Knudsen_Neo_ER_positive_Clin.Cancer.Res.2014_PMID.25047707	Median Expression	PMID.25047707	9837	259266	29980	11065	10541	9133	3930	4085	8100	6253	8614	7295	23371	23428	6241	10403	4137	9236
306	KRAS_amplicon_Genome.Biology.2007_PMID.17493263	Median Expression	PMID.17493263	127845	5965	55110	11171	55726	60488	9412	23012	79912	3845	8496	51768
307	Late_IRS_1_PLoS.One.2016_PMID.26991655	Median Expression	PMID.26991655	554282	100128191	388403	285958	222166	493869	168507	29970	59274	94241	202243	135112	100113407	375056	11332	157313	115294	151194	84961	129607	124152	51191	283431	91768	23657	220134	27338	81930	57761	80179	112770	200958	55635	114134	199870	28989	26227	5530	90834	1503	79000	4141	1058	83729	8847	2258
308	Late_IRS_2_PLoS.One.2016_PMID.26991655	Median Expression	PMID.26991655	723790	399717	222166	157313	29970	92815	60674	114915	132320	11037	388403	151194	84722	80174	147798	51512	90024	27232	23213	58475	983	3122	25902	54800	56477	57568	5347	7490	6450	114134	55789	8349	8935	2258	10200	4288	79789	4886	18	79469	113835	699	2730	355	9928	9638
309	LCK_Breast.Cancer.Research.2008_PMID.19272155	Median Expression	PMID.19272155	55843	22914	54440	9938	6504	55340	4068	1236	3702	28568	5880	11151	5293	9404	5579	6775	9535	6404	10875	2124	1439	3003	64092	55303	3394	3071	3587	28755	3635	51316	6352	919	4050	3561	3059	3575	963	1231	3932	915	939	3001	6402	28566	914	962
310	Lim.et.al.2010.Conserved.aMaSC_BCR.2010_PMID.20346151	Median Expression	PMID.20346151	439921	285203	400745	221749	170954	256691	30818	94274	359845	205428	375484	65989	348013	11245	389136	131566	199953	342667	145407	85360	59352	150465	140862	154810	253827	157869	163782	123879	117581	121551	337876	340554	51768	161742	115557	219928	24147	81831	64359	167691	169200	120071	166336	112849	160622	144402
311	Lim.et.al.2010.Conserved.Luminal.Progenitor_BCR.2010_PMID.20346151	Median Expression	PMID.20346151	151056	283234	83988	27071	259307	64078	10568	130132	245973	51144	124056	118611	145864	140686	59269	255426	79888	114897	117248	25797	4241	5284	9076	2706	6398	8470	7852	1591	10158	7127	7498	2348	3929	83694	1159	290	718	525	41	2001	929	1448	10020	2180	6279	3600
312	Lim.et.al.2010.Conserved.Mature_BCR.2010_PMID.20346151	Median Expression	PMID.20346151	214	221	222	784	1917	2081	2099	2166	2258	2267	2539	2582	2766	3158	3169	3212	3291	3597	3911	4211	4435	4602	5002	5241	5255	5446	5618	5777	5816	6272	6542	6545	6690	6698	6820	6833	6926	7052	7283	7474	7477	8362	8363	8600	8945	9121
313	Lim2009_LumProg_Adam_PMID.25575446	Median Expression	PMID.25575446	2568	6317	1755	3815	8710	10568	1446	56477	389084	1448	79931	79949	10562	6291	728715	55350	1117	1591	79605	5653	9071	284340	3906	8876	202299	134	8685	64127	388115	2348	389336	64078	5295	51703	169044	55286	4145	6491	642120	10148	6271	7100	259307	722	728454	266977
314	Lim2009_MaSC_Adam_PMID.25575446	Median Expression	PMID.25575446	1308	2922	8626	1592	4345	8128	84417	130733	65989	3852	3861	5021	6622	3038	5268	667	4908	84659	5243	9938	200150	3779	6876	84951	374946	4855	80206	27190	72	81029	57158	150572	8190	121551	2047	6263	84709	2817	6578	338376	9119	54997	1825	253827	140597	10485
315	Lim2009_MatureLum_Adam_PMID.25575446	Median Expression	PMID.25575446	79083	213	1917	2203	644151	155465	3169	54843	1907	80736	56521	646360	388743	94009	27324	771	91074	55653	7351	6898	130576	89846	1811	126410	92291	127845	120224	5104	256394	23555	253190	6833	3547	3899	401236	269	5618	55359	399665	8821	23584	26996	203328	92747	84966	79838
316	Lim2009_Stroma_Adam_PMID.25575446	Median Expression	PMID.25575446	6863	8788	5179	4060	1278	1293	10319	84935	5159	1290	8406	7058	1281	1634	117581	5730	7293	5396	131873	5156	7472	400169	9242	1289	149111	145581	27319	1277	5118	1513	623	9945	4239	9839	1910	3037	6423	5069	57124	56944	633	5649	25890	1805	221476	84870
317	Lim2010_LumProg_Adam_PMID.25575446	Median Expression	PMID.25575446	885	3906	255426	5570	387695	9058	642843	54102	92211	7103	6505	151056	23462	7368	84107	244	2299	4241	57126	401138	389384	146395	9459	6696	3111	5925	9075	41	3557	139065	259307	8645	92747	479	6640	2650	85366	64333	735	7351	55824	9780	10320	1850	3751	23052
318	Lim2010_MaSC_Adam_PMID.25575446	Median Expression	PMID.25575446	3852	72	4629	26002	1308	57451	4638	8626	6876	1001	170692	5649	84417	50805	51676	65989	10398	3485	80326	284116	9547	6785	284486	27190	284217	827	3400	10335	3084	23237	90161	89778	11197	157869	1294	7475	7169	3866	25928	2047	28514	644353	64919	420	84249	340706
319	Lim2010_MatureLum_Adam_PMID.25575446	Median Expression	PMID.25575446	8600	486	148	9121	29895	245935	56649	2328	25803	875	3757	5624	658	10900	653121	164656	9379	93010	9476	80723	6926	245930	541468	8344	137362	25907	65266	51090	84315	2539	256933	6821	6048	126961	166824	4351	78997	145957	90353	10747	224	55002	92370	347475	5051	84364
320	Lim2010_Stroma_Adam_PMID.25575446	Median Expression	PMID.25575446	1281	4314	4969	29106	26577	25890	2335	51365	7850	1800	2255	84034	7148	11185	2934	8644	55512	56265	1278	79987	3489	94031	55273	116039	22801	4239	8406	27286	8076	23768	7472	3908	7512	57124	1292	3290	64641	10350	2662	283298	168667	4015	4237	221091	1238	8745
321	Lobular_Carcinoma_In_Situ_J.Pathol.2017_PMID.27861902	Median Expression	PMID.27861902	80332	113451	134548	730	64651	2669	3131	728264	4081	4239	389125	83714	10411	10181	134549	376497	63923	219539
322	LOBULAR_TCGA_SIGNATURE_Immune_related_Cell.2015_PMID.26451490	Median Expression	PMID.26451490	9370	3952	5105	63924	1149	286753	80704	2819	85329	56301	5346	5950	3240	50486	364	366	2167	26577	729	64102	125	206338	729359	375719	2865	30819	3580	152831	401399	948	29953	130399	3036	5140	1271	478	6356	4023	5207	79413	3458	10216	79981	3991	27299	7069
323	LOBULAR_TCGA_SIGNATURE_Reactive_like_Cell.2015_PMID.26451490	Median Expression	PMID.26451490	342667	3861	5650	6663	118430	1308	5803	25818	1828	3852	6898	11202	2893	3872	25928	8424	2568	5653	84417	8190	57144	2196	143662	5288	1825	3866	3854	810	149461	10647	23650	27190	100131897	8838	1830	54763	344905	10568	8626	3773	2348	28965	339855	6422	2173	79192
324	LOBULAR_TCGA_SUBTYPE_Immune_related_Cell.2015_PMID.26451490	Median Expression	PMID.26451490	125	375719	206338	1271	2167	2865	50486	2878	30819	152831	3991	339524	4023	26577	5140	5207	5959	80704	8676	64102
325	LOBULAR_TCGA_SUBTYPE_Proliferative_Cell.2015_PMID.26451490	Median Expression	PMID.26451490	126	10840	146894	91851	80760	6329	92293
326	LOBULAR_TCGA_SUBTYPE_Reactive_like_Cell.2015_PMID.26451490	Median Expression	PMID.26451490	8424	399948	84417	827	149461	1308	1410	65989	79645	2196	2277	2670	2893	64344	90293	25818	339855	59352	4222	8190	284353	57144	221476	5288	5354	6285	286133	6422	28965	6663	342667	7148	8626
327	LUMINAL_Cluster_BMC.Med.Genomics.2011_PMID.21214954	Median Expression	PMID.21214954	4329	55893	23303	2053	138162	55638	57496	26018	1602	9	23362	51466	57758	18	2065	987	2203	10916	55930	79083	367	54681	2099	4602	771	7494	2625	23158	3169	54502	10451	23030	27075	10551	56521	1153	7162	3572	36	10614	9778	7802	8416	55686	51133	55830
328	Luminal_Progenitor_Down_Nat.Med.2009_PMID.19648928	Median Expression	PMID.19648928	283209	166824	220963	253782	30850	94097	202333	64838	11259	85458	131408	153769	115825	140606	57616	147463	162073	124540	128178	113026	51765	81831	27314	23670	200734	80323	55859	7474	29950	139818	64094	123920	26353	2737	54855	84953	57168	55450	23245	9048	84547	7107	50810	26960	79971	22836
329	Luminal_Progenitor_Up_Nat.Med.2009_PMID.19648928	Median Expression	PMID.19648928	574016	494514	415117	285016	169044	344905	221472	391356	94234	29989	203102	266977	64943	374918	153579	11339	245973	120406	260436	84864	143689	59272	131368	340348	255426	165257	140686	337978	51806	23673	389336	201134	90853	118611	116843	27199	80178	149076	81849	137835	152015	136306	220042	129787	150709	92737
330	LumProg_HsEnriched_BCR.2015_PMID.25575446	Median Expression	PMID.25575446	29842	57447	200879	55959	11272	8884	260436	6271	3108	9175	9556	84650	1591	2346	55897	283412	5493	140686	9654	3068	92737	84803	10406	388115	56034	8208	245973	23321	6146	634	3294	255104	3866	725	63892	3122	84311	84266	115019	56477	5655	51451	362	84152	59272	23641
331	LumProg_HsEnriched_Refined1_BCR.2015_PMID.25575446	Median Expression	PMID.25575446	4057	10158	3934	8326	794	6291	11067	6663	3866	2173	362	6590	1117	3815	5655	2568	54763	8842	57348	23321	57447	135112	51312	29842	388115	56477	51700
332	LumProg_Lim09_BCR.2015_PMID.25575446	Median Expression	PMID.25575446	2568	6317	1755	8710	6318	3815	5284	10568	1446	56477	389084	1448	260436	4057	79931	79949	6590	10562	10158	6291	728715	2001	55350	1117	1591	9073	79605	51703	5653	9071	284340	3906	8876	202299	51435	3934	134	8685	64127	58503	388115	54763	3866	2348	152015	389336
333	LumProg_Prat_BCR.2015_PMID.25575446	Median Expression	PMID.25575446	6318	6590	6279	6317	3815	728715	56477	4316	652799	2173	144203	5284	200879	1672	9982	10568	3866	2568	9076	4057	25984	27071	597	3934	8876	100126311	100133941	29842	6280	6523	57530	8942	27151	1365	722	283234	5655	220	8685	10331	634	6291	101	10648	221357	84803
334	LumProg_Shehata_BCR.2015_PMID.25575446	Median Expression	PMID.25575446	4316	260436	5266	6280	6590	728715	6279	10562	5284	2173	4250	8710	2568	6318	79949	3815	8942	8842	4057	6289	2001	6663	6291	5918	3887	9073	1117	93082	1543	220	100133941	6288	1672	1591	9076	3934	4067	57447	8424	6317	3866	92304	1365	56477	152007	83988
335	Lums_HER2E_DOWN_metastatic signature_JCI.2020_PMID.32573490	Median Expression	PMID.32573490	6423	25769	91156	101927678	3872	163782	25758	2568	8076	344752	63923	131578	3494	102606463	4322	1556	10631	8735	642587	3164	8483	2151	4620	11122	6474	79570	2706	4886	4622	100288077	9687	285313	285386	2925	1960	340273	2669	7472	9096	3493	6910	2167	3481	100873408	56670	5746
336	Lums_HER2E_UP_metastatic signature_JCI.2020_PMID.32573490	Median Expression	PMID.32573490	5648	213	730	229	1674	78989	63876	590	3990	2042	1356	383	366	8671	5340	3290	2823	55553	27284	10644	2153	91828	9104	93035	3858	3075	29968	2264	10319	3034	345275	420	316	6554	202134	8876	9515	8685	10321	653	151449	3081	677832	80323	28796	147372
337	Lung.WNT.DiMeo_Cancer.Res.2009_PMID.19549913	Median Expression	PMID.19549913	4041	8326	8839	3204	3233	3215	2776	3065	64072	4775	896	4610	94	8313	1856	4772	1385	7476	100133941	2019	4582
338	Lymphovascular_Invasion_J.Pathol.2017_PMID.27861902	Median Expression	PMID.27861902	23457	171019	729092	64400	213	245	115701	57538	130340	23431	140461	83734	22893	54828	90427	388011	148345	54994	60526	113763	78998	8912	823	863	285025	90324	6366	56477	999	1018	30850	1360	1474	1580	126410	1656	1852	1999	2035	2057	2151	2153	2167	91523	283742	2319
339	M2_Macrophage_Blood.2006_PMID.16556895	Median Expression	PMID.16556895	383	84666	7941	5660	6414	54209	5376	10462	1118	27159	374868	999	2350
340	MacTh1_cluster_Iglesia_CCR.2014_PMID.24916698	Median Expression	PMID.24916698	26191	5330	50856	3111	752	117289	5552	1436	945	713	714	712	1520	146722	3394	388325	4332	313	57705	8832	22797	1536	5294	11309	3113	3115	3122	3109	3108	972	64092	219972	7133	9938	257106	84433	64231	64098	8477	80231	3594	286336	221472	6404	951	3059
341	MAPK_pathway_activation_Wagle_NPJ.Precis.Oncol.2018_PMID.29872725	Median Expression	PMID.29872725	10253	81848	2118	2119	1846	1848	893	595	1969	2043
342	MASC_Down_Nat.Med.2009_PMID.19648928	Median Expression	PMID.19648928	728417	440836	286343	222962	257106	414918	171546	348110	317649	30851	94134	202243	374918	65258	11322	404217	389816	163589	155066	138716	342977	85865	400506	135154	60686	197258	340547	128387	124975	23767	119504	152137	219402	132299	117584	149428	144501	27430	51816	81932	130814	221477	373156	162394	123036	121441
343	MASC_Up_Nat.Med.2009_PMID.19648928	Median Expression	PMID.19648928	541468	653499	439921	285590	494470	404037	170685	221336	30845	94274	266743	359845	205428	66000	375484	389432	11341	642477	246126	259217	133584	353322	342667	348180	121457	59352	85450	154810	117246	140862	157869	147381	160622	256691	401720	151306	254428	164091	340554	51804	131566	201514	203522	166336	24147	81928
344	Mature_Luminal_Down_Nat.Med.2009_PMID.19648928	Median Expression	PMID.19648928	389432	284217	221061	152273	349136	84909	29968	205428	64924	11202	196996	121227	135295	59271	147700	117195	140885	131583	23682	51303	128553	81620	144165	57685	146433	113612	53335	130497	115123	55691	26230	27340	29015	7447	134430	80183	28232	112849	116496	81029	145864	79192	54463	128077	56606	79817
345	Mature_LuminaUp_Nat.Med.2009_PMID.19648928	Median Expression	PMID.19648928	285368	222484	168544	257106	352909	30061	94240	203328	65982	374907	11320	404550	390637	345757	161835	340481	138162	85462	195814	158158	134548	60481	123099	151126	127845	155465	401546	146923	143425	23596	130888	81617	27345	51760	149563	126410	201895	115811	154141	118932	199974	120224	389383	132989	59344	121506
346	MatureLum_HsEnriched_BCR.2015_PMID.25575446	Median Expression	PMID.25575446	2203	23584	23225	8976	7033	54847	27324	143098	25998	22874	25800	1501	163	80303	55002	89894	5819	84915	5768	80221	59084	92840	3597	8945	7357	79838	5878	9245	1616	84343	3858	57580	1955	2746	26996	3169	4088	57182	822	92291	81617	5825	79956	161835	3248	55686
347	MatureLum_HsEnriched_Refined1_BCR.2015_PMID.25575446	Median Expression	PMID.25575446	3895	79443	7031	11257	54677	9424	4148	5825	8945	5167	5241	1528	5819	6833	8821	11226	7802	2203	4602	7033	3169	10551	155465	79083	25803	25800	56521	89765	26996	27075	57758	54847	55686	64084	27324	130576	79666	51760	92291	79838	115677	92840	80303	55103	388743	55614
348	MatureLum_Lim09_BCR.2015_PMID.25575446	Median Expression	PMID.25575446	7031	79083	213	1917	2203	644151	10538	155465	3169	54843	1907	80736	6690	158158	56521	646360	7052	388743	94009	27324	4604	771	91074	9245	55653	222	79679	7351	6898	130576	89846	1811	199974	4582	126410	92291	10509	240	127845	3158	120224	5104	7033	256394	94121	23555
349	MatureLum_Prat_BCR.2015_PMID.25575446	Median Expression	PMID.25575446	120224	10538	3169	79838	374	56521	118430	5304	56892	7052	10551	9245	54843	55359	51280	9723	22998	1907	27324	79083	158158	92291	36	2203	80223	2651	10529	2066	360	51097	201895	10519	720	286343	4680	25805	388743	115677	5167	7033	2258	12	79170	6690	6307	7802
350	MatureLum_Shehata_BCR.2015_PMID.25575446	Median Expression	PMID.25575446	91074	56892	56521	3169	79083	80303	80223	4604	118430	7035	64284	7020	54843	7033	10538	1917	563	644151	3315	4582	1528	7351	92291	9518	1287	6542	5004	100133941	481	4214	7052	27289	22998	629	158158	84689	94009	6376	240	7357	201895	80162	57535	150696	10519	24
351	MBASAL_BMC.Med.Genomics.2011_PMID.21214954	Median Expression	PMID.21214954	8537	23566	64840	7869	30818	91828	285203	1462	26002	80781	4147	894	3915	11328	8611	54578	6038	4232	1809	1284	1282	55084	84168	6591	140862	389119	874	7041	10398	1264	627	27345	133584	9651	3714	655	8626	3852	23650	1308	420	10913	3400	50805	1001	166647
352	MCD3_CD8_BMC.Med.Genomics.2011_PMID.21214954	Median Expression	PMID.21214954	3932	390243	151888	5450	4242	115350	84824	9214	51617	1840	940	26999	4068	3111	921	9840	27040	89857	2833	4050	84329	6689	1380	30009	10750	10870	3603	643	974	51237	931	55843	26228	923	8631	926	915	914	3702	925	917	6402	399	3695	3560	1731
353	MCF7.E2.induced.genes_JCO.2006_PMID.16505416	Median Expression	PMID.16505416	400793	221710	285489	342184	169200	29984	92610	205327	65265	11171	389792	127602	114904	140707	151195	158046	164832	60481	124045	87178	137492	57486	23678	26578	85004	81929	51807	149175	113457	80781	163732	284454	91694	90853	157285	55969	79000	29128	80176	150678	79734	90411	64377	53838	1054	5979
354	MCF7.E2.repressed.genes_JCO.2006_PMID.16505416	Median Expression	PMID.16505416	728294	100133941	441027	653583	286495	400961	100093630	220213	165215	255743	619279	29923	94241	202333	359948	65250	11342	376497	115548	390963	645431	132949	58190	155060	196513	140467	84958	642826	100131564	148398	163050	128710	23731	130916	81628	253832	387680	160418	389337	27352	51760	144699	126353	124995	89122	153222
355	MDACC.FNA.1_J.Clin.Oncol.2010_PMID.20805453	Median Expression	PMID.20805453	652493	28959	11309	26586	972	7412	3543	6347	10457	100132941	5730	9332	9935	3123	5360	348	713	4917	5175	28902	28862	28831	3514	3526	3535	3502	3507	3113	3119	3117	3500	3512	712	3122	100133739
356	MDACC.FNA.2_J.Clin.Oncol.2010_PMID.20805453	Median Expression	PMID.20805453	284119	131578	221395	83716	27122	57493	115207	11259	80781	23452	54829	219654	79086	8613	25903	26585	7538	80310	2878	5919	57088	10631	8076	4320	3554	9590	9891	5376	1009	2353	7169	54587	23213	4837	10186	358	165	23022	2697	6695	5740	1634	6424	56944	2037	22795
357	MDACC_P53_ER.Pos_CCR.2011_PMID.21248301	Median Expression	PMID.21248301	64151	55355	83450	81930	54442	7272	81493	22974	4213	5898	9611	11004	6241	6790	55165	4605	4751	3800	23410	10096	10403	4175	10460	9905	23397	5888	699	4174	474170
358	MDSC_Granulocytic_Youn_J_Leukoc_Biol.2012_PMID.21954284	Median Expression	PMID.21954284	100	9133	820	8698	2298	2330	2354	2812	3512	3929	4048	4057	4155	4353	5004	5657	641371	55143	8434	1687	55	1992	51449	11065	27333	29942	57509	3039	140460	932	55796	55789	353189	10420	9055	25903
359	MDSC_Neutrophil_Youn_J_Leukoc_Biol.2012_PMID.21954284	Median Expression	PMID.21954284	894	1154	1234	2919	2921	3383	3557	3569	3627	4023	4323	4502	4794	5196	5900	6275	6281	6354	6385	6648	6696	7057	7124	7185	9641	23328	23657	55686	56895
360	MDSC_tumor_MO_Schlecker_J.Immunol.2012_PMID.23152559	Median Expression	PMID.23152559	6351	6348	6354	338442	5008	10409	6369	383	967	1339	9034	6696	10022	7070	4323	5996	3303	29923	3553	339210	2920	4360	4322	2919	467	3932	1026	9047	2012	929	28984	1601	10912	6385	4283	23179	29126	4643	1263	58191	8877	1958	713	8870	1154	101
361	MDSC_tumor_Schlecker_J.Immunol.2012_PMID.23152559	Median Expression	PMID.23152559	123	290	383	467	712	713	714	817	839	929	958	1026	1154	1234	1462	1476	1522	1601	1643	1827	1845	1846	1893	1910	1958	2012	2078	2155	2159	2213	2309	2549	2697	2799	2810	2919	2920	3119	3123	3162	3303	3304	3383	3557	3617	3680
362	MECM_BMC.Med.Genomics.2011_PMID.21214954	Median Expression	PMID.21214954	27147	22821	56895	10536	57333	60681	4035	114904	6560	23187	4094	4046	4681	1893	3479	5509	7059	11167	51661	2200	1290	6678	5480	7431	152007	3956	2014	5654	7056	2202	4969	94031	3489	5376	25927	9452	285313	23179	10544	947	51705	118429	1281	1280	1278	9509
363	MERCK_Immune_signature_Science.2018_PMID.30309915	Median Expression	PMID.30309915	6352	939	29126	80381	925	1240	4283	10663	3117	3123	3133	3620	3902	4818	80380	5699	6772	201633
364	MET_DOWN_RNA_Seq_Significant_Genes_JCI.2018_PMID.29480819	Median Expression	PMID.29480819	8540	10678	8446	79828	90826	79635	51062	65062	8455	2734	283742	51493	152579	57721	8886	7247	26230	221785	158431	154796	647979	54467	84146	84255	64418	81839	23172	11196	399818	9061	4683	257415	10885	11128	79691	79183	10929	10196	79776	7561	4644	2965	144108	9911	23201	4773
365	MET_DOWN_Significant_Genes_LOW_BASALS_1_Genes_JCI.2018_PMID.29480819	Median Expression	PMID.29480819	1833	90	1490	11328	1303	8038	1278	25878	131578	4322	160428	55752	23022	79776	5738
366	MET_DOWN_Significant_Genes_LOW_BASALS_2_Genes_JCI.2018_PMID.29480819	Median Expression	PMID.29480819	26128	9836	4236	150737	84340	55781	84135	54925	8863	1519	122786	2737	10512	8864	8790	10026	79635	4644	85476	54467	79691	8886	55631	84146	10885	8455	647979	57721	90826	25998	55709	9646	144108	9724	11196	7204	7414	23169	9392	284349	7596	7565	57343	90233	55659	256051
367	MET_UP_RNA_Seq_Significant_Genes_JCI.2018_PMID.29480819	Median Expression	PMID.29480819	147081	8448	653190	57105	92979	54064	26508	144195	177	2294	6939	284185	126567	84734	3373	84418	6556	402665	220136	90246	138311	348093	80094	85452	2563	389206	256329	129080	153579	730	63876	283870	37	57582	2057	57139	126006	8906	23113	9772	1725	2872	2580	54760	23769	1198
368	MET_UP_Significant_Genes_HIGH_BASALS_Genes_JCI.2018_PMID.29480819	Median Expression	PMID.29480819	8632	200186	9909	23381	10650	402573	3613	1051	8531	7139	388730	144195
369	METAPLASTIC_Up_CanRes.2009_PMID.19435916	Median Expression	PMID.19435916	644903	497190	414308	285590	342371	100101467	221395	390148	170680	29935	266743	94031	201562	65983	374977	11333	256949	246721	155060	163175	126364	118471	138802	196883	85329	134637	151613	60677	641522	192669	144125	132320	124274	51744	23705	254956	149111	147138	388364	81698	112849	27443	92483	219972	59340	117156
370	MFGFR2_BMC.Med.Genomics.2011_PMID.21214954	Median Expression	PMID.21214954	57710	65997	56271	55859	340706	84206	145581	79901	6422	343958	10874	796	83446	116442	9723	55190	2730	9953	9955	64711	27190	5723	64927	144402	1491	2263	79623	85460
371	MHC.I_Breast.Cancer.Research.2008_PMID.19272155	Median Expression	PMID.19272155	3135	3105	3106	3107	3134
372	MHC.II_Breast.Cancer.Research.2008_PMID.19272155	Median Expression	PMID.19272155	1520	972	3123	3117	3109	3113	3115	3108	3122	3937	5552	5788
373	MHC_Forero_11_Cancer.Immunol.Res.2016_PMID.26980599	Median Expression	PMID.26980599	4261	972	3113	3115	3116	3117	3123	3127	3128	1512	8648	100290966	731247
374	MHC_Forero_24_Cancer.Immunol.Res.2016_PMID.26980599	Median Expression	PMID.26980599	4261	972	3113	3115	3116	3117	3123	3127	3128	1512	8648	100290966	731247	913	2217	3861	57121	89846	6844	120892	4154	4916	84265	5730	6451	9760	399472
375	MHistone_BMC.Med.Genomics.2011_PMID.21214954	Median Expression	PMID.21214954	3006	3007	255626	8347	8294	8363	3012
376	MICRORNA_138_Signature_Cancer.Res.2014_PMID.25339353	Median Expression	PMID.25339353	688	836	896	934	956	1466	1583	1978	2146	2189	3014	3040	3589	4015	4068	4172	4277	4781	4784	5111	5427	5775	5887	5914	6241	6929	6938	7083	7298	7431	7703	7913	8061	8289	8412	8462	8701	8862	9134	9567	9575	9582	9683	9887	10979	11082
377	Miller_B_P_Metagene_Genome_Biol_2013_PMID.23618380	Median Expression	PMID.23618380	3537	3500	3507	3493	3492	3514	28831	50802	28823	100293211	5450	608	91316	3495	91353	100423062
378	Miller_M_D_Metagene_Genome_Biol_2013_PMID.23618380	Median Expression	PMID.23618380	3113	7940	3133	3115	3119	3108	3122	3123	972
379	Miller_Proliferation_Metagene_Genome_Biol_2013_PMID.23618380	Median Expression	PMID.23618380	4288	83461	9134	1062	1063	23397	51514	79682	56992	55388	7153	6241	332	9768	2305	7298	9133	991	11065	983	4085	9232	701	9787	11130	9319	6790	10403	1164	3832	4751	7272	9833	1058	9837	9928	11004	699	1033	22974	890	891	9055	51203	24137	55165
380	Miller_T_NK_Metagene_Genome_Biol_2013_PMID.23618380	Median Expression	PMID.23618380	4242	10875	3587	916	5579	2841	2124	1521	3820	6375	3059	3635	5293	962	951	6402	3932	54440	1439	939	3003	729230	11151	3603	28517	3702	10730	5788	5880	4818	55340	55843	474344	9938
381	MIR_200c_Induced_ONCO.2015_PMID.25746005	Median Expression	PMID.25746005	29	101	195	202	211	217	239	269	270	301	302	306	307	310	311	360	367	384	421	443	613	639	654	683	726	754	796	797	814	831	857	858	916	928	956	960	961	978	987	1003	1012	1026	1124	1134	1285	1295
382	MIR_200c_Repressed_ONCO.2015_PMID.25746005	Median Expression	PMID.25746005	48	59	147	158	238	273	291	395	440	558	586	627	658	685	835	840	871	891	1013	1123	1281	1381	1394	1404	1429	1459	1491	1601	1758	1762	1806	1808	1844	1909	1943	1947	1978	1993	2030	2051	2070	2191	2192	2303	2586	2624
383	MITO1_BMC.Med.Genomics.2011_PMID.21214954	Median Expression	PMID.21214954	79833	746	29095	1337	7295	10952	1329	6728	4717	10063	1347	10975	27089	521	9556	4707	6902	1350	51372	514	29093	51650	4708	51373	23480	10248	9551	7979	23658	51371	5805	26521	10632	51021	51504	1351	26519	8655
384	MITO2_BMC.Med.Genomics.2011_PMID.21214954	Median Expression	PMID.21214954	59286	10175	23256	55745	10668	55837	6166	5706	51637	2287	2764	522	757	26175	10972	3920	9255	8649	28977	52	28978	518	5686	5716	3336	8813	79023	7411	4706	27258	5110	79568	11235	10190	10438	25972	8520	27249	51138	830	5861	515	10286	4711	5683	4190
385	Mitotic_Count_J.Pathol.2017_PMID.27861902	Median Expression	PMID.27861902	86	7832	54838	119032	79000	23492	54908	891	991	993	55839	1153	1408	27161	9837	8833	83903	55355	3767	10112	11004	24137	122773	100130733	4209	9833	4288	79083	151507	23397	55922	115677	4898	59277	10039	493911	5564	5690	10411	5984	6421	6472	221150	80736	8404	6897
386	MK14_K17_BMC.Med.Genomics.2011_PMID.21214954	Median Expression	PMID.21214954	55287	10089	23237	5653	3918	8045	55503	85409	9569	9620	389084	3860	3855	10406	4084	9982	360	5493	2125	79919	8581	80157	244	151516	3861	2810	3872	27076	4070	6382	127534	810	5317	3914	338322	23593	5017	64065	688	3963	1959
387	MKRAS_amplicon_BMC.Med.Genomics.2011_PMID.21214954	Median Expression	PMID.21214954	387849	636	60488	11228	51026	8496	65981	56938	23012	51768	3845	10526	79912	55726	55196	80763	51290	151987	9412	55297
388	MM_BRCAwnt_1pFDR_UP_Genome.Biology.2007_PMID.17493263	Median Expression	PMID.17493263	441478	650200	286075	729082	404550	222662	256714	349136	171023	30818	96764	65264	205717	375790	11346	326625	389558	341640	399818	201475	162515	166647	646300	85460	60678	154881	140862	197407	148789	644150	135398	160622	122953	127262	144402	24149	94104	340075	51773	81930	338596	116987	159195	130872	132158	137392
389	MM_C3Tag.2012_Genome.Biol.2013_PMID.24220145	Median Expression	PMID.24220145	176	244	306	332	675	683	699	835	890	991	994	1029	1031	1032	1058	1062	1063	1111	1363	1719	1839	1894	1946	1958	1959	2013	2189	2274	2295	2297	2491	2643	2956	3036	3070	3624	3627	3832	3833	3845	3872	3914	3925	3958	3978	4065
390	MM_C3Tag_1pFDR_UP_Genome.Biology.2007_PMID.17493263	Median Expression	PMID.17493263	439921	642658	286827	400746	339665	165918	222229	261734	29980	95681	203068	65062	11346	154467	389558	378708	245812	126731	195814	84904	59343	139818	116988	255104	121268	137075	51764	259266	144699	148979	151648	124245	135228	81620	133418	201299	219348	24144	115399	285282	113452	94239	284023	27076	91683	147015
391	MM_Class3_Genome.Biol.2013_PMID.24220145	Median Expression	PMID.24220145	652	1146	1995	2823	2928	3273	3386	3963	4062	5340	5457	5883	6170	6329	6519	7276	8288	8653	9607	9971	10249	11001	11007	11189	22913	22953	22986	23040	23154	23263	24146	51092	51093	51208	55311	55586	56169	57526	79816	80774	81932	84174	84203	91523	124783	127003
392	MM_Class8_Genome.Biol.2013_PMID.24220145	Median Expression	PMID.24220145	150	900	1009	1026	1311	1363	1490	1647	1758	1839	1893	2030	2303	2681	2791	3491	3624	3675	3691	3918	4322	5159	6361	6574	6696	6709	7980	8412	8870	9244	9509	9547	10763	11092	23213	26532	29995	50509	51390	53827	55508	56172	64221	64393	80781	83959
393	MM_Claudinlow_Genome.Biol.2013_PMID.24220145	Median Expression	PMID.24220145	101	150	165	240	358	947	963	967	1009	1231	1278	1280	1289	1290	1291	1436	1466	1513	1634	1809	1893	1992	2004	2009	2015	2162	2200	2202	2217	2219	2274	2295	2335	2619	2644	2669	2791	2995	3071	3075	3090	3159	3371	3399	3553	3569
394	MM_DMBAwnt_1pFDR_UP_Genome.Biology.2007_PMID.17493263	Median Expression	PMID.17493263	388650	285203	170692	341640	219699	255324	619279	30818	93099	65997	11197	641371	151516	116442	140880	85407	166647	27031	158947	60436	130026	126638	57335	123606	136227	163778	23650	51702	149420	338596	112849	145581	81832	80031	133584	114818	147463	89778	340654	139886	65055	135295	90865	7584	148641	50805
395	MM_Erbb2.like_Genome.Biol.2013_PMID.24220145	Median Expression	PMID.24220145	119	123	196	230	629	684	688	744	760	929	1107	1154	1191	1297	1356	1365	1366	1535	1572	1672	1999	2001	2170	2180	2182	2348	2710	2731	2877	3131	3434	3627	3655	3665	3827	3880	3885	3906	3929	3959	3963	4057	4070	4257	4258	4316
396	MM_Green1_BMC.Med.Genomics.2011_PMID.21214954	Median Expression	PMID.21214954	9625	9619	54	58	60	70	72	59	8751	101	9510	113	118	1675	150	154	165	199	203	214	245	56172	306	308	244	8639	316	2167	323	10290	330	334	339	347	348	7026	358	360	23237	374	389	29984	397	10095	483	567
397	MM_Green10_BMC.Med.Genomics.2011_PMID.21214954	Median Expression	PMID.21214954	132	175	217	230	257	10935	9588	316	8943	341	347	384	55973	627	2173	652	655	658	150572	708	55799	847	839	857	871	885	595	894	10576	7203	1009	1001	1019	1022	1114	4435	1184	1207	7122	1282	1284	1286	1290	1297	9318	1411
398	MM_Green11_BMC.Med.Genomics.2011_PMID.21214954	Median Expression	PMID.21214954	35	60	70	72	59	118	141	158	197	9049	205	208	309	1173	8943	375	381	383	468	488	506	516	523	527	550	578	11331	8915	9275	9274	682	9184	51719	811	821	10487	826	829	832	839	890	896	904	9973	10694	975
399	MM_Green12_BMC.Med.Genomics.2011_PMID.21214954	Median Expression	PMID.21214954	343	10656	2741	27232	4313	5626	53916	8459	8408	30814	9466	29851	2000	26287	1620	83661	84276	28990	130026	121355	219938	273	84256	29903	26276	5198	442179	119678	57053
400	MM_Green13_BMC.Med.Genomics.2011_PMID.21214954	Median Expression	PMID.21214954	5858	35	43	1134	58	88	89	4185	126	11318	174	186	189	258	259	4143	286	322	335	336	10930	345	350	487	563	63827	2173	652	654	779	782	786	816	827	844	845	1496	859	862	940	1013	8941	1113	1114	1158	7122
401	MM_Green14_BMC.Med.Genomics.2011_PMID.21214954	Median Expression	PMID.21214954	49	1137	8973	1145	153	197	215	242	160	363	432	445	623	729	726	875	930	916	1015	1007	55997	1180	1047	1260	254263	64506	56138	1409	1463	1588	1649	8788	117531	1814	9427	1908	2016	2039	2056	2066	2147	2151	2169	64319	2206	2245
402	MM_Green15_BMC.Med.Genomics.2011_PMID.21214954	Median Expression	PMID.21214954	115	285	56172	244	358	383	384	397	538	9601	1116	80781	1294	1356	1446	1447	286828	1448	1476	1604	1647	28514	8404	55785	2184	10468	2512	8326	2673	2683	1831	2805	2817	9289	3309	3117	3119	3122	3099	51478	10808	6383	3714	3764	3861	3956
403	MM_Green16_BMC.Med.Genomics.2011_PMID.21214954	Median Expression	PMID.21214954	9197	147	57491	241	265	351	570	2658	825	759	886	915	921	926	2833	820	8530	10047	1075	23316	1644	54514	11144	1833	2027	2078	8263	2222	8549	2252	2277	2563	2565	2633	2648	54332	2672	2897	2993	3001	3053	3094	3213	6532	3587	3567
404	MM_Green17_BMC.Med.Genomics.2011_PMID.21214954	Median Expression	PMID.21214954	861	9821	1054	9575	1385	8661	2729	23095	51274	3845	4001	51341	4734	4775	51701	5036	9520	5728	8737	2734	6645	7013	7014	7403	7707	9908	5000	8826	23036	53981	55183	29080	9406	1730	5898	64398	6815	8663	51144	9217	51678	5862	90007	140609	9147	57337
405	MM_Green18_BMC.Med.Genomics.2011_PMID.21214954	Median Expression	PMID.21214954	9370	126	11318	1675	183	186	249	2167	2720	710	717	761	120329	912	948	917	3075	1280	1281	1350	1471	1571	1572	1604	1634	1800	2053	2168	2273	2350	63924	50486	2625	2940	3479	3543	9452	5264	4015	4016	4023	4060	4223	4313	9	4837
406	MM_Green19_BMC.Med.Genomics.2011_PMID.21214954	Median Expression	PMID.21214954	332	84889	641	672	675	699	701	890	9133	995	983	8317	1058	1786	1894	83461	3070	3149	3190	3619	4172	4171	4173	4175	9833	2296	4361	2956	4998	5027	5111	5395	5422	5426	5427	5557	5558	5888	6118	6240	6241	79801	6489	6491	7884	9212
407	MM_Green2_BMC.Med.Genomics.2011_PMID.21214954	Median Expression	PMID.21214954	1140	93	142	10038	158	202	326	8165	249	230	309	8906	10053	9179	332	333	362	343	369	377	8153	406	421	466	472	481	3184	550	22994	580	11331	10295	599	602	9274	27018	638	641	23246	672	675	57448	682	688	699	701
408	MM_Green20_BMC.Med.Genomics.2011_PMID.21214954	Median Expression	PMID.21214954	9510	397	255877	594	8913	894	1012	1000	1021	1080	80781	1280	1289	1292	1294	1381	1428	1462	1906	133418	2059	2192	60681	2335	10468	11167	2619	2746	10630	1902	10536	9446	3240	3400	3485	3837	9452	3714	3757	3908	3912	4016	4035	54674	4121	4128
409	MM_Green21_BMC.Med.Genomics.2011_PMID.21214954	Median Expression	PMID.21214954	567	766	971	2633	345611	3627	3434	3433	10379	5698	5696	163351	4599	3959	5720	401409	6352	6672	6772	8743	11274	9636	115361	81030	9111	64108	684	3430	64135	7318	221421	56829	83666	10561	55080	85441	388646	8638	4939	54739	54625
410	MM_Green22_BMC.Med.Genomics.2011_PMID.21214954	Median Expression	PMID.21214954	123	249	362	760	765	929	9076	55907	1297	8738	1446	1447	286828	1448	2001	2152	2348	8836	23462	9957	3398	3710	3775	3783	3875	3880	3906	290	3934	4058	4240	10370	5295	5660	5878	6388	8991	51804	6523	6660	6720	22822	7018	10497	50853	7494
411	MM_Green23_BMC.Med.Genomics.2011_PMID.21214954	Median Expression	PMID.21214954	2129	9261	5232	23309	81849	8170	148281	10612	165721	51373	55290	79370	56605	163087	81706	64800	55128	1801	84699	50506	149420	91523	9507	8904	3696
412	MM_Green24_BMC.Med.Genomics.2011_PMID.21214954	Median Expression	PMID.21214954	224	475	483	7832	302	10951	928	998	999	8837	1182	1660	1778	1973	1997	22905	2195	2965	8924	3178	3182	3267	3416	3459	3659	4124	4140	4152	4170	5713	4077	5306	5451	4927	5861	51082	51720	85477	6430	5268	6773	7006	7042	7073	9948	2073
413	MM_Green25_BMC.Med.Genomics.2011_PMID.21214954	Median Expression	PMID.21214954	10677	8165	217	258	361	8153	417	487	495	590	10295	669	827	847	844	147381	1020	1059	1119	1384	1600	1652	1674	1746	1760	1837	2042	2260	2286	2331	2548	166	2890	3205	3213	3491	3778	3851	8861	4005	4547	23645	4668	4782	4784	4741
414	MM_Green3_BMC.Med.Genomics.2011_PMID.21214954	Median Expression	PMID.21214954	37	346	1146	89	92	94	112	115	119	123	128	132	134	140	148	146	177	183	189	57491	249	247	241	265	286	288	10935	9588	8906	10053	11154	337	341	345	351	359	361	362	364	343	401	10124	433	460	463	63974
415	MM_Green4_BMC.Med.Genomics.2011_PMID.21214954	Median Expression	PMID.21214954	22	10006	48	53	8754	128	132	10038	158	175	9049	204	224	262	292	310	10935	8546	1176	9474	331	8539	362	9716	375	378	383	405	427	1386	468	506	509	522	523	529	8992	538	567	573	55973	10282	648	677	699	23412
416	MM_Green5_BMC.Med.Genomics.2011_PMID.21214954	Median Expression	PMID.21214954	9625	10006	1140	9370	126	1675	154	122622	375790	196	197	213	214	216	217	230	276	291	306	307	308	316	2167	329	333	334	339	10930	341	348	350	358	374	381	387	389	395	427	491	8915	596	663	677	694	718	775
417	MM_Green6_BMC.Med.Genomics.2011_PMID.21214954	Median Expression	PMID.21214954	153	326	214	245	2671	244	317	332	339	23237	84889	571	641	650	683	672	675	699	701	27101	23581	860	865	11335	890	9133	898	25819	908	994	995	983	8318	8317	1021	1027	1029	1030	9425	9620	1058	1072	1080	1128	9021	1265
418	MM_Green7_BMC.Med.Genomics.2011_PMID.21214954	Median Expression	PMID.21214954	92	337	770	1031	1261	1523	1581	2036	2129	2155	2242	2299	2670	2780	27239	610	3990	3362	3480	972	339855	9261	8685	4504	4653	63908	5232	9463	5579	9050	5803	5990	5430	6262	6263	6274	6338	23309	729014	442038	7015	7016	51368	118471	51393	64375
419	MM_Green8_BMC.Med.Genomics.2011_PMID.21214954	Median Expression	PMID.21214954	51	100	123	133	1675	175	204	226	362	410	463	567	706	717	721	765	834	837	831	25819	912	948	950	3732	1051	1116	10752	1191	1311	10063	1356	1362	1382	1446	286828	1448	1509	1514	1520	1571	1632	7905	1803	667	10637	8404
420	MM_Green9_BMC.Med.Genomics.2011_PMID.21214954	Median Expression	PMID.21214954	1675	202	230	245	10053	334	341	481	10079	780	847	999	1036	8190	9620	1116	10207	1154	1159	1365	1364	1191	1297	1298	1299	1446	1447	286828	1448	1525	1572	1622	1756	1777	1838	10278	26298	1999	2001	2045	2125	2139	2195	8789	9982	8326
421	MM_Myc.2012_Genome.Biol.2013_PMID.24220145	Median Expression	PMID.24220145	100	158	191	249	269	343	440	594	699	701	708	721	790	957	991	1111	1371	1572	1620	1678	1757	1789	1965	2287	2348	2547	2557	2805	2940	3329	3382	3422	3781	4128	4489	4502	4522	4691	4750	4833	4839	4925	4953	5080	5166	5198
422	MM_Myoepithelioma.like_Genome.Biol.2013_PMID.24220145	Median Expression	PMID.24220145	70	150	157	185	214	247	319	341	347	379	567	627	655	796	885	1000	1036	1264	1294	1308	1364	1395	1428	1672	1755	2034	2103	2152	2244	2246	2327	2328	2331	2619	2621	2669	2729	2893	2982	3007	3169	3212	3399	3400	3485	3574
423	MM_Neu.2012_Genome.Biol.2013_PMID.24220145	Median Expression	PMID.24220145	36	81	115	183	222	230	249	290	341	359	362	383	567	667	744	767	834	837	948	954	1101	1154	1297	1298	1301	1311	1318	1346	1604	1806	1848	2030	2053	2064	2115	2152	2182	2348	2591	2731	2940	3002	3131	3164	3306	3398
424	MM_NeuPyMT_1pFDR_UP_Genome.Biology.2007_PMID.17493263	Median Expression	PMID.17493263	497661	440275	286828	403313	221692	256302	171586	352999	30845	94121	203522	65987	11345	376267	391059	85462	155066	192670	349633	134549	167359	60626	143686	345079	197322	151126	340526	132014	342945	23779	117584	401409	347734	140838	119710	121355	158747	51809	81932	165324	139341	113235	146439	162387	138050	389816
425	MM_Normal.like_Genome.Biol.2013_PMID.24220145	Median Expression	PMID.24220145	32	34	51	58	126	276	316	358	364	419	715	718	761	779	885	912	948	954	974	1036	1149	1158	1160	1264	1339	1346	1375	1376	1528	1571	1572	1580	1604	1634	1675	1805	1806	1831	2027	2028	2034	2053	2167	2170	2180	2194
426	MM_Normal_1pFDR_UP_Genome.Biology.2007_PMID.17493263	Median Expression	PMID.17493263	729991	654790	494470	554235	442038	286257	613212	222659	171586	317649	353500	30846	474344	415116	96459	203447	266812	66005	11346	404550	431707	378938	259236	646486	392780	246778	85508	349565	192668	60592	154791	390168	94274	158376	257177	377007	140862	24149	51807	81889	345757	163175	198437	401262	136371	121340
427	MM_p53null.Basal_Genome.Biol.2013_PMID.24220145	Median Expression	PMID.24220145	13	214	269	326	339	341	403	627	655	666	874	894	1000	1001	1027	1029	1265	1266	1282	1284	1294	1308	1428	1491	1545	1605	1718	1748	1809	1815	1959	1994	2059	2192	2201	2290	2521	2619	2743	2817	2877	2882	2941	3014	3066	3276
428	MM_p53null.Luminal_Genome.Biol.2013_PMID.24220145	Median Expression	PMID.24220145	16	33	229	259	333	350	381	440	669	830	858	891	961	999	1029	1104	1114	1118	1119	1140	1361	1373	1411	1503	1536	1595	1647	1718	1912	2168	2169	2638	2643	2791	2847	2906	3005	3108	3156	3198	3399	3481	3484	3556	3569	3570
429	MM_p53null_1pFDR_UP_Genome.Biology.2007_PMID.17493263	Median Expression	PMID.17493263	163351	84225	124801	57192	29969	11274	51268	8638	5202	1080	55647	54458	6774	7391	60	4233	7982	4791	3621	55365	3122	11010	3981	2634	10673	2896	3433	684	8497	858	10561	971	10908	629	8451	3394	830	2877	29956	2628	6773	345611
430	MM_Potluck_1pFDR_UP_Genome.Biology.2007_PMID.17493263	Median Expression	PMID.17493263	548645	653560	493869	286319	404636	439921	257106	170954	221955	353116	30008	474344	94240	203328	66005	11346	643155	391253	377677	245972	340419	197358	348093	85464	161176	60685	401494	140809	154796	157855	118429	375387	168667	152519	135228	144110	389136	165215	81618	24145	147372	51762	149628	254102	167153	130132
431	MM_PyMT.2012_Genome.Biol.2013_PMID.24220145	Median Expression	PMID.24220145	43	290	463	602	1297	1604	1728	1798	2115	2182	2348	2557	3012	3267	3398	3488	3906	3929	3988	4128	4706	4832	4925	5184	5288	5295	5806	5861	5900	5925	6304	6398	6468	6720	6903	7043	7069	7227	8483	9252	9424	9685	9728	9789	10157	10295
432	MM_Red1_BMC.Med.Genomics.2011_PMID.21214954	Median Expression	PMID.21214954	33	34	37	50	51	54	1134	9370	58	70	88	89	59	443	8751	126	131	11318	1675	135	150	154	122622	165	176	285	183	199	203	211	212	216	226	240	276	56172	291	306	308	244	8639	316	2167	323	10290	330
433	MM_Red10_BMC.Med.Genomics.2011_PMID.21214954	Median Expression	PMID.21214954	9625	9370	101	133	1675	176	245	56172	244	2167	332	369	23237	382	389	10095	57194	84889	580	8538	672	675	688	694	712	718	721	302	822	726	8573	835	836	1495	865	890	25819	971	928	994	995	8318	8317	1013	1017	1026
434	MM_Red11_BMC.Med.Genomics.2011_PMID.21214954	Median Expression	PMID.21214954	9619	1137	8973	1145	8751	23394	142	153	197	326	216	330	8539	7026	363	9915	1386	488	509	65217	571	63827	596	637	2173	655	775	10487	726	839	867	887	890	9973	10694	975	994	8318	1019	1021	1039	9425	1116	1180	9575	1211
435	MM_Red12_BMC.Med.Genomics.2011_PMID.21214954	Median Expression	PMID.21214954	177	215	337	540	353500	770	1649	1749	117531	9149	9427	2016	2129	2299	2538	2786	610	3087	3200	3868	4281	4336	4352	4504	5232	5579	5803	6017	5430	6274	23309	6654	729014	10062	118471	2829	8431	130497	6363	2104	9454	81849	8170	10368	148281	10612
436	MM_Red13_BMC.Med.Genomics.2011_PMID.21214954	Median Expression	PMID.21214954	1146	11318	57491	258	265	351	361	570	631	2658	786	793	825	759	763	844	886	1013	1006	820	23242	1690	1401	1755	1404	10047	1075	1600	1644	22943	1745	1750	1758	1823	1828	1833	1837	2038	2042	2153	8549	2257	2258	2565	2566	54332
437	MM_Red14_BMC.Med.Genomics.2011_PMID.21214954	Median Expression	PMID.21214954	33	114	123	230	384	10079	567	596	760	765	766	834	837	120329	1500	953	999	1154	1159	9076	1191	1301	1297	1311	1356	1362	8738	1446	1447	317712	286828	1448	1512	1520	1655	2064	2152	10211	2348	2591	2625	2633	10314	9957	345611	3434
438	MM_Red15_BMC.Med.Genomics.2011_PMID.21214954	Median Expression	PMID.21214954	132	285	245	247	2167	347	374	384	483	55973	627	639	655	23412	796	858	947	948	953	962	928	1009	1022	1056	3075	1116	1121	1364	1231	1264	1308	1381	1382	1428	1446	1447	317712	286828	1448	1510	1604	1634	1672	1800	1959	8661
439	MM_Red16_BMC.Med.Genomics.2011_PMID.21214954	Median Expression	PMID.21214954	43	93	141	158	207	309	1173	322	333	375	382	8153	487	506	526	578	11331	10295	9274	682	827	832	847	896	7203	1019	1020	8941	1052	1059	1119	1196	1291	1297	1277	9564	1414	28988	1639	1642	1650	3177	1674	8694	1785	1819
440	MM_Red17_BMC.Med.Genomics.2011_PMID.21214954	Median Expression	PMID.21214954	343	10656	8484	2741	27232	4313	4750	9148	4917	5626	53916	8459	8408	5529	30814	9466	29851	2000	26287	170680	83661	84276	28990	246777	123355	130026	57683	121355	219938	83999	1643	5229	51316	29903	26276	5198	442179	138802	119678	57053
441	MM_Red18_BMC.Med.Genomics.2011_PMID.21214954	Median Expression	PMID.21214954	337	1436	1447	1523	2129	2155	2299	2780	3990	3480	972	339855	9261	4653	63908	5232	9463	5579	5699	5803	6263	6338	23309	7015	7016	51368	118471	51393	6363	225	81849	8170	27120	148281	10563	10612	165721	55879	55176	53822	83714	51373	55290	404220	79370	10953
442	MM_Red19_BMC.Med.Genomics.2011_PMID.21214954	Median Expression	PMID.21214954	58	88	89	286	10930	487	779	816	1158	1339	8048	1674	2027	2273	3270	4151	4618	4619	4620	4622	4626	8736	9172	4703	4892	5816	5837	6253	7138	7140	7168	23632	6445	11155	29765	4608	5224	57159	9499	51778	58529	7170	23676	161247	90523	131377
443	MM_Red2_BMC.Med.Genomics.2011_PMID.21214954	Median Expression	PMID.21214954	37	48	51	1140	9370	100	115	123	1675	122622	183	202	11217	249	217	224	226	230	288	309	310	9588	8906	11154	333	359	362	343	369	383	10124	463	481	509	523	529	8992	535	10295	2720	638	696	9601	780	801	805
444	MM_Red20_BMC.Med.Genomics.2011_PMID.21214954	Median Expression	PMID.21214954	245	306	244	323	360	683	688	795	861	1026	1030	9620	1308	1413	1525	1545	23604	1824	1893	10913	1906	1944	1947	2051	2125	8263	2192	9982	1490	127534	3315	3397	3400	3606	3554	3624	9314	3861	3872	3854	3958	3985	301	8581	4086	4118
445	MM_Red21_BMC.Med.Genomics.2011_PMID.21214954	Median Expression	PMID.21214954	696	765	1382	1446	1447	286828	1572	1604	2001	2348	2355	50486	2624	2678	2706	3906	290	3988	4057	5284	5625	55859	5900	6523	6696	6776	7043	7069	7494	641371	27134	55504	7274	9424	642843	222487	10144	10103	29108	129642	51099	352999	79746	245973	9914	810
446	MM_Red22_BMC.Med.Genomics.2011_PMID.21214954	Median Expression	PMID.21214954	101	199	330	397	929	915	962	963	971	9308	9023	11151	2833	1234	84343	1520	1535	1536	9420	9046	2014	2015	2123	2207	2213	10875	2793	8477	3002	629	10964	3055	3059	3394	3627	3459	974	10068	3594	3553	3557	8809	3560	3569	3575	3635
447	MM_Red23_BMC.Med.Genomics.2011_PMID.21214954	Median Expression	PMID.21214954	212	56172	341	567	696	784	765	885	912	948	954	1039	1131	1195	1311	1350	317712	286828	1604	1628	10278	1950	1956	2098	8326	8836	2760	2940	2944	2947	23462	3162	3164	9955	3601	3798	687	3910	8543	4053	4515	10763	8878	57575	5152	11240
448	MM_Red24_BMC.Med.Genomics.2011_PMID.21214954	Median Expression	PMID.21214954	9370	1675	276	8639	2167	761	948	1036	1149	1571	2053	2194	63924	8322	9289	4023	4837	5105	5733	5950	6517	6817	7069	10449	56301	85329	56729	729359	51085	57104	84649	84293	56246	284904	5346	23491	4329	80339	56994	2202	2998	120224	89944	153201
449	MM_Red25_BMC.Med.Genomics.2011_PMID.21214954	Median Expression	PMID.21214954	216	347	655	894	1001	1308	80781	1282	1284	1294	1428	28514	1789	1815	10913	8507	23136	53335	10468	2534	8326	2239	2822	2941	2946	10964	3400	3714	3861	342574	3910	4232	4602	5010	5450	6091	7869	23616	6560	6573	6591	8626	1809	80326	50619	11197
450	MM_Red3_BMC.Med.Genomics.2011_PMID.21214954	Median Expression	PMID.21214954	5858	25	40	346	49	1134	1144	1145	1146	10880	89	94	119	134	148	146	150	153	174	176	177	185	186	189	203	215	216	242	259	265	268	272	160	8120	335	336	337	341	344	345	350	351	359	360	364	343
451	MM_Red4_BMC.Med.Genomics.2011_PMID.21214954	Median Expression	PMID.21214954	22	1146	100	101	128	142	158	183	326	204	205	249	241	2671	265	10935	9588	8906	10053	1176	332	362	343	406	466	472	481	498	506	516	570	573	581	55973	11331	587	594	10295	599	10282	637	638	2658	23246	669	675
452	MM_Red5_BMC.Med.Genomics.2011_PMID.21214954	Median Expression	PMID.21214954	9625	33	60	72	59	113	118	165	197	326	205	213	214	245	2671	306	307	308	244	1174	1173	9179	332	334	339	360	23237	374	377	381	387	389	10095	466	468	481	538	84889	3184	550	22994	578	580	8915	602	9274
453	MM_Red6_BMC.Med.Genomics.2011_PMID.21214954	Median Expression	PMID.21214954	70	9510	196	326	214	216	339	341	347	358	360	384	395	397	627	655	55799	796	860	595	894	1012	1000	1001	1028	1036	8190	9620	1153	4435	254263	1264	1265	1272	1308	80781	1282	1284	1290	1294	1299	1413	1428	1462	1466	1545
454	MM_Red7_BMC.Med.Genomics.2011_PMID.21214954	Median Expression	PMID.21214954	9625	33	34	37	48	50	51	9370	58	89	123	126	11318	1675	122622	204	211	216	276	286	8639	10935	316	2167	334	10930	341	358	361	364	374	10124	487	549	594	10017	654	150572	717	718	721	779	761	762	847	844
455	MM_Red8_BMC.Med.Genomics.2011_PMID.21214954	Median Expression	PMID.21214954	92	102	128	196	202	326	249	230	245	288	8125	337	395	10124	641	675	677	694	699	23412	760	120329	835	1499	10951	595	10576	1021	8190	28981	9425	1052	1056	9620	1070	1101	10207	1153	9076	1195	9575	1261	1690	1350	10815	10814
456	MM_Red9_BMC.Med.Genomics.2011_PMID.21214954	Median Expression	PMID.21214954	53	54	8038	8728	101	8754	113	133	165	175	199	241	257	56172	306	244	317	374	378	383	387	427	475	527	55973	639	649	650	658	646	683	712	713	714	719	302	801	813	10487	822	824	829	830	834	837	120329
457	MM_Squamous.like_Genome.Biol.2013_PMID.24220145	Median Expression	PMID.24220145	101	196	222	244	301	383	390	639	655	666	683	710	715	831	860	1009	1026	1294	1308	1428	1475	1545	1634	1672	1734	1823	1824	1832	1839	1893	1906	1992	2125	2171	2192	2200	2709	2919	2941	3038	3371	3400	3553	3569	3575	3624
458	MM_Stat1_Genome.Biol.2013_PMID.24220145	Median Expression	PMID.24220145	101	133	148	157	185	214	238	379	481	627	664	667	688	727	999	1001	1026	1271	1305	1396	1510	1514	1634	1672	1780	1833	1893	2069	2103	2150	2152	2153	2244	2258	2274	2277	2327	2328	2335	2572	2729	2878	2936	3091	3169	3175
459	MM_WapINT3.2012_Genome.Biol.2013_PMID.24220145	Median Expression	PMID.24220145	107	249	675	694	1438	1499	1525	1749	2001	2129	2155	2538	2676	2823	2824	2904	2982	3170	3625	3696	3815	3990	3992	4176	4212	4214	4436	4653	4761	4774	4851	4855	4864	5635	5803	5998	6051	6170	6263	6363	6376	6423	6495	6509	7015	7102
460	MM_WapINT3_1pFDR_UP_Genome.Biology.2007_PMID.17493263	Median Expression	PMID.17493263	494470	644150	441478	401541	222553	170689	285966	347733	374907	256987	619279	317703	29999	94134	203074	65266	11061	338596	84978	143279	155006	122060	136647	128602	115286	118471	165721	57699	163087	112399	140890	160728	60682	126353	23670	168667	345778	134187	132204	81849	27324	255324	153364	149420	283078	51747
461	MM_WAPTag_1pFDR_UP_Genome.Biology.2007_PMID.17493263	Median Expression	PMID.17493263	415116	653319	286410	157570	221496	387751	259266	30011	201134	94240	64946	373863	360023	347735	11274	642843	138065	151648	85441	59349	134429	197259	118442	256126	283635	340348	144233	345079	147841	130617	51809	115004	343099	27301	128866	24137	81930	132660	116987	195828	122769	124222	113452	254042	127829	91687
462	MM_Wnt1.Early_Genome.Biol.2013_PMID.24220145	Median Expression	PMID.24220145	196	216	222	244	306	326	347	390	627	655	861	1001	1021	1026	1265	1272	1282	1294	1307	1308	1368	1490	1815	1906	1947	1959	1998	2051	2125	2134	2192	2203	2296	2743	2824	2941	3038	3400	3480	3624	3625	3664	3680	3714	3797	3833
463	MM_Wnt1.Late_Genome.Biol.2013_PMID.24220145	Median Expression	PMID.24220145	408	1056	1272	1428	1620	2266	3696	3992	4222	4232	4761	4953	5069	5803	6263	7041	7043	7373	7471	8613	8904	9261	9543	9865	10398	11197	23092	23309	25984	27190	54221	54549	55084	55086	55504	56605	57094	57633	60682	64240	64375	65055	65997	80031	84069	84206
464	Mmyosin_BMC.Med.Genomics.2011_PMID.21214954	Median Expression	PMID.21214954	3040	2244	213	197	3484	3481	4632	7136	7125	29895	291
465	MNADH_CYTochrome_BMC.Med.Genomics.2011_PMID.21214954	Median Expression	PMID.21214954	5805	201562	6390	4719	3419	27069	10135	145482	5194	2110	8803	54205	122553	128338	7386	1738	54968	51128	51115	1349	84869	9694	4724	2271	51110	4190	1528	55847	4704	23788	5162	2108	4729	7385	3421	4705	122961	8443	55967
466	MNB1_BMC.Med.Genomics.2011_PMID.21214954	Median Expression	PMID.21214954	85329	55862	80339	2194	5095	3176	29103	98	1376	6342	912	4329	1666	26275	25874	1737	2632	4594	2992	51660	3420	8802	11112	116254	1891	3032	6389	34	388962	1892	57678	5577	84293	51635	7069	50486	10144	128486
467	MNB2_BMC.Med.Genomics.2011_PMID.21214954	Median Expression	PMID.21214954	10555	23175	6576	134147	1675	3290	37	1036	10580	152831	32	419	23531	2326	211	7123	84883	80830	6258	57104	2180	126	5348	3991	5502	276	55512	145957	6296	2954	2053	130827	5468	5105	5950	1571	23491	5733	56301	153201	56246	761	9370	729359	63924	5346
468	MNB3_BMC.Med.Genomics.2011_PMID.21214954	Median Expression	PMID.21214954	54715	23336	7273	6261	219537	1674	487	5837	844	57538	4892	4618	200539	29765	90523	10930	57159	4619	4620	7140	7168	9172	5816	202333	2027	9499	4606	89	23676	10345	58529	5224	3270	1339	1160	1158	6253	56203	779	84700	4626	6345	88	8736	79041	4703
469	MNOtch4_BMC.Med.Genomics.2011_PMID.21214954	Median Expression	PMID.21214954	220	155006	11061	7328	6376	401013	51196	114789	91107	125931	171177	9415	3170	115111	23493	29995	4855	54622	8403	6509	155465	5655	23250	126353	132204	3957	9201	494470	90362	2736	83596	91768	58508	4774	24149	10217	118812	155066	9538	84894	112703	90990	79414	7102
470	Monocytic_lineage_MCP_PMID.31942075_PMID.31942077	Median Expression	PMID.31942075|PMID.31942077	55803	1436	2359	8942	7941	83937	22797
471	Mouse_Human_ImmuneProfiles_SHAY_M_H_Induced_in_B_PNAS.2013_PMID.23382184_	Median Expression	PMID.23382184	19	330	489	605	640	643	695	930	931	933	951	958	971	972	973	974	1185	1235	1380	1387	1456	1657	1960	2181	2185	2208	2841	2872	2889	3280	3399	3592	3662	3708	3915	4033	4064	4208	4209	4214	4641	5079	5106	5142	5287	5290
472	Mouse_Human_ImmuneProfiles_SHAY_M_H_Induced_in_DC_PNAS.2013_PMID.23382184_	Median Expression	PMID.23382184	1471	1776	2322	2828	3383	4610	5058	5199	5547	6252	7045	8321	9314	10875	23677	28955	51177	54802	55022	55509	55521	57118	57698	79887	80005	80176
473	Mouse_Human_ImmuneProfiles_SHAY_M_H_Induced_in_GN_PNAS.2013_PMID.23382184_	Median Expression	PMID.23382184	306	366	383	526	706	719	728	820	928	929	1116	1436	1441	1675	2896	3082	3162	3176	3934	4057	4814	4973	5154	5329	5724	6280	6403	6688	6813	6916	7057	7077	7097	7099	7130	8301	8972	9764	9826	10159	10170	10457	10562	10634	11237	23569
474	Mouse_Human_ImmuneProfiles_SHAY_M_H_Induced_in_HSC_PNAS.2013_PMID.23382184_	Median Expression	PMID.23382184	34	284	328	332	402	444	501	594	667	672	701	759	760	783	835	947	983	1017	1019	1021	1063	1111	1163	1312	1503	1523	1602	1635	1718	1793	1854	1869	1876	1892	1954	1964	2078	2099	2119	2120	2135	2237	2288	2356	2553	2624
475	Mouse_Human_ImmuneProfiles_SHAY_M_H_Induced_in_MO_PNAS.2013_PMID.23382184_	Median Expression	PMID.23382184	136	526	719	1026	1051	1317	1436	1462	1508	1827	1848	1861	2131	4035	5271	5326	6051	6237	6256	6614	7045	7056	7133	7941	8522	8754	9056	9732	9777	9935	10577	10855	10924	22918	26509	51311	55022	55160	55486	64127	206358	219654
476	Mouse_Human_ImmuneProfiles_SHAY_M_H_Induced_in_NK_PNAS.2013_PMID.23382184_	Median Expression	PMID.23382184	598	864	1521	2151	3001	3140	3458	3560	3673	3824	3982	4818	5782	6574	7008	8459	8530	8807	8809	9437	11030	11092	11126	11145	11178	11285	30009	54438	54843	79158	81563	83988	254531
477	Mouse_Human_ImmuneProfiles_SHAY_M_H_Induced_in_T_PNAS.2013_PMID.23382184_	Median Expression	PMID.23382184	23	120	158	166	360	399	406	472	476	596	814	841	894	914	915	916	917	919	921	923	939	940	944	955	1107	1236	1455	1477	1493	1540	1606	1643	1778	1936	2071	2073	2113	2145	2308	2534	2580	2617	2625	3097	3268	3337
478	MProliferation_BMC.Med.Genomics.2011_PMID.21214954	Median Expression	PMID.21214954	1763	51175	11065	7083	10293	54892	343099	3925	1786	3978	5424	8914	9088	84080	4796	64785	7884	259266	3832	26586	81610	157313	84930	10051	151246	9585	10592	57082	132320	84904	9918	5111	9735	24137	6241	2146	10635	27085	5422	55789	55872	7272	29899	991	1058	1854
479	MProtocadherin_BMC.Med.Genomics.2011_PMID.21214954	Median Expression	PMID.21214954	54661	10099	4026	29116	91947	9737	9338	64743	23767	6642	83941	26994	1390	10333	5570	953	6375	3002	834	120329	837	134265	11342	7099	140738	5538	6446	147323	23582	3140	56122	56121	56129	57717	83464	54863	220002	84727	56944	5742	5947	3275	1848	5791	11186	11173
480	MPYMT_NEU_Cluster_BMC.Med.Genomics.2011_PMID.21214954	Median Expression	PMID.21214954	8835	8738	5284	79627	5295	64078	11264	7103	5051	8528	283871	84299	54847	283537	8934	10157	5867	93517	290	7494	2348	6523	10497	80255	8395	765	1318	3906	373861	6720	255743	388228	94086	3483	89932	54102	9728	6948	7532	7018	55220	696	3131	123036	2731	57575
481	MRibosomal_BMC.Med.Genomics.2011_PMID.21214954	Median Expression	PMID.21214954	6137	6209	11266	6134	6154	56659	6188	6170	200916	6173	6207	728937	25873	6230	6218	6229	11224	6142	23521	6171	4833	11138	10399
482	MS_CD44_DOWN_PNAS.2009_PMID.19666588	Median Expression	PMID.19666588	440335	553158	317762	403313	284106	222484	163183	260425	92689	200634	126695	29841	64699	10551	642649	157638	59277	195814	85415	119391	257019	148327	116441	80747	400793	51686	23779	124739	114569	155465	27134	154043	255743	7227	89891	123099	152485	151473	2651	26273	28981	57669	91057	5618	58492	1154
483	MS_CD44_UP_PNAS.2009_PMID.19666588	Median Expression	PMID.19666588	445815	283824	200230	400949	157381	85027	255812	352954	128077	30011	64857	388397	11278	118429	378805	348013	153129	114793	60489	80212	25900	57724	23635	51621	29005	56548	55553	63925	54808	53827	5786	83478	10409	50999	6609	4205	2677	50515	8034	79686	84656	3839	976	2014	7431	8913
484	MSquamous_BMC.Med.Genomics.2011_PMID.21214954	Median Expression	PMID.21214954	79852	11005	8909	92196	388818	9119	647264	353323	3882	6699	284366	43849	56300	9022	57864	254240	442388	1823	27179	92736	342574	254910	8689	5275	337969	126638	162605	3886	3881	84560	337879	353288	85293	254950	284110	26525	112802	147183	84518	390940	3868	93099	54544	388533	5650	6785
485	MUnknown_1_BMC.Med.Genomics.2011_PMID.21214954	Median Expression	PMID.21214954	113829	57409	79701	56953	81858	25807	5158	55111	27341	90480	90407	10201	140686	10459	23399	10014	89941	10573	54496	51149	6603	83451	51367	55657	8834	55090	197322	83933	5442	8449	10523	23644	5432	197258	57794	84838	7988	55565	2178	5190	57140	80325	84461	92579	55311	26229
486	MUnknown_10_BMC.Med.Genomics.2011_PMID.21214954	Median Expression	PMID.21214954	7874	8073	96459	79577	6815	331	57187	9147	57018	57223	23201	23036	79811	55183	51735	49855	2804	90007	1054	11176	23774	4926	6314	51341	51274	11214	378938	8405	4775	80790	2734	29123	9520	56254	282809	27336	9813	5862	1385	29080	9908	5927	8663	23063	55119	9295
487	MUnknown_11_BMC.Med.Genomics.2011_PMID.21214954	Median Expression	PMID.21214954	2842	90506	7004	83959	10331	340277	54815	10907	5522	5365	55721	63976	1075	135152	11074	55265	195828	201134	80714
488	MUnknown_12_BMC.Med.Genomics.2011_PMID.21214954	Median Expression	PMID.21214954	23279	11127	5756	3840	22803	8539	9689	79718	8725	54915	9874	5876	11164	55003	57050	51567	23435	1434	1665	1024	26354	9972	10915	2058	1736	10528	5147	6810	51150	8454	55288	5445	54432	9861	8833	3066	5702	10920	5707	55234	10694	54780	9337	10296	2551	54737
489	MUnknown_13_BMC.Med.Genomics.2011_PMID.21214954	Median Expression	PMID.21214954	23279	11127	5756	3840	22803	8539	9689	79718	8725	54915	9874	5876	11164	55003	57050	51567	23435	1434	1665	1024	26354	9972	10915	2058	1736	10528	5147	6810	51150	8454	55288	5445	54432	9861	8833	3066	5702	10920	5707	55234	10694	54780	9337	10296	2551	54737
490	MUnknown_14_BMC.Med.Genomics.2011_PMID.21214954	Median Expression	PMID.21214954	54877	9329	405	138151	79969	84952	221079	26225	9819	3652	6526	55907	55500	9847	79836	57620	387921	9135	51108	1611	81855	54947	55785	56925	29984	6513	8870	9516	6574	7286	9761	11057	26003	5167	64855
491	MUnknown_15_BMC.Med.Genomics.2011_PMID.21214954	Median Expression	PMID.21214954	255520	81533	8883	28972	123803	54602	23161	55754	400	9039	27020	7756	55074	64645	23412	6884	79665	9375	55216	139322	196294	8450	80145	83640	5682	285672	27125	9367	255919	55916	29071	139341	158747	6399	10972	51030	10617	83752	11345	3281	224	57213	81542	51528	58533	51124
492	MUnknown_16_BMC.Med.Genomics.2011_PMID.21214954	Median Expression	PMID.21214954	117154	38	7389	83592	119710	22921	9317	127018	285315	23423	55829	30844	6727	9709	51009	10026	27248	9482	84173	25979	128308	4702	9054	29796	4717	1347	90871	51019	391356	1350	10975	65018	79777	11154	4482	6271	135114	221477	55313	51693	51079	10749	3029	449520	23410	64122
493	MUnknown_17_BMC.Med.Genomics.2011_PMID.21214954	Median Expression	PMID.21214954	51393	9507	5803	118471	84699	81706	163087	64800	148281	23309	51373	55290	8170	50506	10612	55128	79814	2538	337	133923	6338	414301	23678	2242	79490	1261	403282	219429	393046	79370	5579	203074	3696	94134	55296	55086	163778	9261	84321	55879	1801	56605	165721	149420	2129	8904
494	MUnknown_18_BMC.Med.Genomics.2011_PMID.21214954	Median Expression	PMID.21214954	85358	340205	2815	1511	4747	1496	56961	4185	6442	3216	782	116519	116154	3381	4856	29924	652	4607	2006	338	7104	2264	58510	158763	1807	54898	3849	3158	6529	3083	114787	1421	9745	81551	58498	5730	8788	5858	7033	1411	55937	6440	4621	2168	350	229
495	MUnknown_19_BMC.Med.Genomics.2011_PMID.21214954	Median Expression	PMID.21214954	23013	8431	215	10391	80725	57731	6853	85455	2823	3273	55586	9427	10062	9247	84816	9454	55655	27177	6654	440955	80774	26256	4298	5430	79631	22953	9149	127003	2786	127733	10886	11309	24146	2829	177	117531	128859	55113	11045	51087	10507	1504	113828	130813	881	27152
496	MUnknown_2_BMC.Med.Genomics.2011_PMID.21214954	Median Expression	PMID.21214954	10956	51734	10169	26515	80162	7185	29763	7466	26262	55698	25851	9980	9711	79874	10106	23295	6640	6609	9351	535	7249	686	5252	57659	7084	55654	4043	51763	29948	9780	339665	9114	8509	57410	23646	54896	124997	27173	23406	51272	6016	1845	92154	221955	9600	9935
497	MUnknown_20_BMC.Med.Genomics.2011_PMID.21214954	Median Expression	PMID.21214954	84905	64718	219870	219873	84872	153	1749	55176	57699	128602	28985	140699	7100	3761	80221	84662	390073	115286	51384	51157	10238	4864	84219	81442	79751	3743	84961	29999	6833	729756	2626
498	MUnknown_21_BMC.Med.Genomics.2011_PMID.21214954	Median Expression	PMID.21214954	162427	10945	3636	9354	26958	4041	22913	90550	161176	27289	57142	10550	5878	7416	5660	6697	84926	64925	64320	84656	54732	4001	116225	3833	1998	11062	5887	4357	27338	4188
499	MUnknown_22_BMC.Med.Genomics.2011_PMID.21214954	Median Expression	PMID.21214954	5526	5592	164091	6041	8566	1979	51094	115992	5567	10044	199870	4763	128637	55974	6645	26063	125058	27013	5463	25865	9399	51317	55062	29800	596	54850	1849	9854	124359
500	MUnknown_23_BMC.Med.Genomics.2011_PMID.21214954	Median Expression	PMID.21214954	7045	113277	6039	2124	5788	962	9404	10261	7096	80231	56833	10326	64581	9450	199	2533	53827	9308	4066	11025	5199	9473	55016	3059	83706	3635	3071	4689	122618	64231	2123	2015	2793	5800	126364	79792	1043	3394	375387	5880	11151	54440	64005	23526	4033	6404
501	MUnknown_24_BMC.Med.Genomics.2011_PMID.21214954	Median Expression	PMID.21214954	55041	6883	9016	55559	4065	80329	6923	5889	55013	4860	115761	23601	10644	9123	683	60370	135228	5593	284254	10232	29960	8407	10095	5413	1263	84617	7097	3687	29950	6452	9021	51330	3958	822	7941	55917	3597	79180	3726	10611	1029	3159	26509	8291	92689	83930
502	MUnknown_25_BMC.Med.Genomics.2011_PMID.21214954	Median Expression	PMID.21214954	81839	10865	11060	1958	59341	2771	1052	23564	2013	201191	9948	389	79990	114990	221421	1796	7791	8877	4616	439921	26000	84464	4650	11021	23139	79447	63940	57591	5598	79798	5770	9696	221184	642658	124222	221002	9355	55509	113230	1032	4931	642475	94032	646174	94239	11132
503	MUnknown_26_BMC.Med.Genomics.2011_PMID.21214954	Median Expression	PMID.21214954	23510	79042	10474	9807	5863	4097	1605	84629	8019	6597	9817	83638	54480	4000	84232	116988	64132	64175	6494	55501	2768	118	79586	2548	2896	54785	55700	4245	6046	29801	8312	339123	6499	1020	5829	54862	221908	23030	10801	23523	51497	58509	6929	8683	8703	54910
504	MUnknown_27_BMC.Med.Genomics.2011_PMID.21214954	Median Expression	PMID.21214954	7317	10120	79058	112398	2767	14	9191	381	9274	8078	7917	1639	2011	26020	7392	56257	2783	81857	30827	4221	10445	64949	10102	5987	51154	5094	6832	1642	55621	51073	5245	79863	5704	30968	53615	64969	84285	55379	7307	3276	8815	7203	661	55718	51603	56926
505	MUnknown_28_BMC.Med.Genomics.2011_PMID.21214954	Median Expression	PMID.21214954	150290	9573	170384	51232	80207	337872	54998	1072	254042	10964	23042	3123	9113	129831	10478	51701	79591	4045	124801	7391	26127	154043	5311	127428
506	MUnknown_29_BMC.Med.Genomics.2011_PMID.21214954	Median Expression	PMID.21214954	439951	64579	137814	132671	58488	5276	412	55858	379	8941	2906	94234	341359	23395	3092	2306	127343	51604	9047
507	MUnknown_3_BMC.Med.Genomics.2011_PMID.21214954	Median Expression	PMID.21214954	81693	8468	92840	10992	23636	55089	1369	83881	942	50651	6512	64951	3604	25902	6895	23551	23252
508	MUnknown_30_BMC.Med.Genomics.2011_PMID.21214954	Median Expression	PMID.21214954	815	143872	9644	7799	442117	160419	84072	84569	55205	138255	57718	126326	80119	11273	9333	2247	28954	54505	3800	84675	63826	222183	54984	64220	84134	80243	63893	57602	8498	5994	143279
509	MUnknown_31_BMC.Med.Genomics.2011_PMID.21214954	Median Expression	PMID.21214954	9646	114803	4520	29072	51244	23759	7566	5875	2072	64223	91754	63894	9950	55140	57446	81669	2113	6793	55677	9425	84132	1027	493861	9825	83548	9897	23173	55274	10713	8428	5894	22828	55180	55131	3607	55593	23039	5981	55421	23514	7247	1633	55756	7862	7187	81628
510	MUnknown_32_BMC.Med.Genomics.2011_PMID.21214954	Median Expression	PMID.21214954	4340	83449	63876	83445	729533	389151	6992	6795	115330	151531	443	63926	145258	2039	5335	91289	57185	92092	94033	93627	65125	80895	4993	10499	50488	10297	126308	57605	402665	80741	8564	390010	4804	125875	56413	222662	4825	23511	158248	646603	7916	79065	192683	91300	90316	375686
511	MUnknown_33_BMC.Med.Genomics.2011_PMID.21214954	Median Expression	PMID.21214954	55116	776	27136	571	257169	1794	79842	83593	283130	143471	138311	113263	6327	23338	51176	9687	6932	56155	340075	166614	9760	10888	1769	22807	814	326624	6503	84929	10320	11126	63946	346673	124857	219	4145	619207	59350	26507	167826	387357	50852	150280	353238	83882	23390	84251
512	MUnknown_34_BMC.Med.Genomics.2011_PMID.21214954	Median Expression	PMID.21214954	84923	26092	29946	30851	140576	23299	8915	5580	3455	7040	23710	22826	403	113	51024	9158	10487	8417	3717	25824	6836	10916	81618	114879	84557	10488	84062	141	59	72	70	5714	127262	8490
513	MUnknown_35_BMC.Med.Genomics.2011_PMID.21214954	Median Expression	PMID.21214954	285761	51548	5079	57156	254956	3814	26532	5270	146712	83844	9993	23037	57549	57216	11332
514	MUnknown_4_BMC.Med.Genomics.2011_PMID.21214954	Median Expression	PMID.21214954	9120	203197	9424	201164	2232	140461	64093	116844	721	124995	80347	28958	5709	64978	55840	9963	84769	8200	6730	5304	131177	352999	1572	84561	2557	23457	10380	2582	81570	51537	10587	1537	25828	957	27132	1608
515	MUnknown_5_BMC.Med.Genomics.2011_PMID.21214954	Median Expression	PMID.21214954	51179	932	2811	142680	63974	51046	22943	9068	9365	55195	886	26059	131034	340260	4807	340024	140462	2658	866	1146	29881	54332	114625	265	29958	57393	91464	27284	64922	7276	10047	6098	8653	1644	54474	759	731	6588	2641	2565	25834	341116	649458	6690	285525	433
516	MUnknown_6_BMC.Med.Genomics.2011_PMID.21214954	Median Expression	PMID.21214954	7268	9070	6206	5471	23195	10436	9255	29087	84924	84164	79622	91272	51550	771	3416	3313	10989	9512	56910	498	65003	84340	57103	10622	11222	55173	25940	5631	29078	80273	54948	54853	51056	7371	10138	28998	221656	55969	84908	131076	6637	51690	84154	26610	54471	57461
517	MUnknown_7_BMC.Med.Genomics.2011_PMID.21214954	Median Expression	PMID.21214954	54934	7296	10160	10548	23028	6429	90861	166793	23186	9810	84108	9937	4601	5576	78991	79714	2671	51477	5657	56061	65123	55734	126526	5514	84271	27293	54707	60673	7709	5571	79643	4141	2193	57407	126549	10535	51531	84440	283643	100000000	9942	84545	25864	7866	3613	201266
518	MUnknown_8_BMC.Med.Genomics.2011_PMID.21214954	Median Expression	PMID.21214954	65012	8786	145942	64375	1643	84276	4543	83999	9148	23112	5626	5229	5529	57053	8408	84256	1620	130026	5198	83661	121355	53916	273	3608	123355	4750	9466	170680	29903	2741	442179	79618	27232	343	8459	4917	138802	26276	119678	28990	29851	30814	57683	26287	219938	246777
519	MUnknown_9_BMC.Med.Genomics.2011_PMID.21214954	Median Expression	PMID.21214954	8086	11094	55101	5030	10314	5024	5201	342898	5881	10174	66000	57151	705	65987	57528	8372	51700	4284	359	4852	3798	26998
520	Murat_G07_J.Clin.Oncol.2008_PMID.18565887	Median Expression	PMID.18565887	285	871	1003	1277	1278	1281	1282	1284	1289	1290	1292	1293	1305	1909	2028	2113	2200	2331	2335	3489	3910	3912	3915	4017	4053	4060	4256	4430	4811	5118	6591	7169	7450	8038	8829	9124	9871	10052	11014	11015	22795	22918	25878	25903	27286	50507
521	Murat_G18_J.Clin.Oncol.2008_PMID.18565887	Median Expression	PMID.18565887	361	760	1837	2152	3696	3707	4129	4693	5028	5080	6507	7101	8424	23209	23657	116984
522	Murat_G24_J.Clin.Oncol.2008_PMID.18565887	Median Expression	PMID.18565887	140	202	240	241	341	597	712	713	929	963	972	1075	1326	1436	1475	1520	1524	2124	2162	2207	2209	2212	2357	2533	3055	3059	3108	3113	3115	3122	3162	3381	3684	3689	4332	4481	5265	5788	6036	6039	6279	6280	6402	6518	6850	7048
523	MVEGFC_BMC.Med.Genomics.2011_PMID.21214954	Median Expression	PMID.21214954	23635	408	7067	3995	57146	8848	7373	493869	2982	29015	1471	6423	168667	3248	130132	158947	51309	9823	7424	63874	2824	395	8613	8436	9865	8434	2983	10769	51285	25825	374907	441478	7127	6925	57048	1153	200312	146198
524	Myeloid_dendritic_cells_MCP_PMID.31942075_PMID.31942077	Median Expression	PMID.31942075|PMID.31942077	909	910	913	10462	1193	645638
525	Necrosis_J.Pathol.2017_PMID.27861902	Median Expression	PMID.27861902	84448	133	10598	210	262	129138	23647	90423	4059	7832	79133	84996	51300	84733	165055	83879	64866	64946	10428	1111	26511	26973	1356	1408	8453	1788	29980	1843	30001	2151	90268	79696	202309	64785	2863	3014	3066	55355	3099	3145	3295	3336	11185	23030	23588	388152
526	Neutrophils_MCP_PMID.31942075_PMID.31942077	Median Expression	PMID.31942075|PMID.31942077	762	1084	3577	3579	4051	2215	3034	3772	1955	51312	79689	9895	7090	8794	55350
527	NK_cells_MCP_PMID.31942075_PMID.31942077	Median Expression	PMID.31942075|PMID.31942077	11126	3802	3804	3805	3811	3813	9437	5729	117157
528	Nuclear_Pleomorphism_J.Pathol.2017_PMID.27861902	Median Expression	PMID.27861902	262	83464	54838	119032	55765	57658	9133	23582	991	993	8318	1111	1153	1408	27161	8833	27202	55355	56888	23303	10112	11004	7804	4137	9833	79083	64151	23397	115677	4998	5347	146923	23371	22974	84790
529	Parity_signature_Troester_251_BCR.2014_PMID.25005139	Median Expression	PMID.25005139	283316	2212	241	8876	945	940	2213	55840	3937	3587	29760	64092	51167	3357	57217	9296	51284	84079	3684	55013	54504	23484	1230	6281	199857	9056	91851	6275	3682	6347	260293	23582	10673	644	114926	51411	962	7251	2745	8705	5184	2123	51635	122970	3936	63898
530	Parity_signature_Troester_40_BCR.2014_PMID.25005139	Median Expression	PMID.25005139	283316	2212	241	8876	945	940	2213	55840	3937	3587	29760	64092	51167	3357	57217	9296	51284	84079	3684	55013	54504	23484	1230	6281	199857	9056	91851	6275	3682	6347	260293	23582	10673	644	114926	51411	962	7251	2745	8705
531	PARP_sensitivity_MDACC_NPJ.Syst.Biol.Appl._2017_PMID.28649435	Median Expression	PMID.28649435	51097	3070	5393	8089	9014	152100	10657	4437	6138	55872	51143	983	10768	51271	9709	83737	84947	10076	84164	22913	55902	10904	50650	5909	1831	3554	81031
532	PARP_Sensitivity_Signature_NEGATIVE_Sci.Adv.2017_PMID.28439535	Median Expression	PMID.28439535	10768	51271	9709	83737	84947	10076	84164	22913	55902	10904	50650	5909	1831	3554	81031
533	PARP_Sensitivity_Signature_POSITIVE_Sci.Adv.2017_PMID.28439535	Median Expression	PMID.28439535	51097	3070	5393	8089	9014	152100	10657	4437	6138	55872	51143	983
534	Pfefferle2012_LumProg_PMID.25575446	Median Expression	PMID.25575446	6318	6590	6279	6317	3815	728715	56477	4316	652799	2173	144203	5284	200879	9982	10568	3866	2568	9076	4057	25984	27071	597	3934	8876	29842	6280	6523	8942	27151	1365	722	283234	5655	220	8685	10331	634	101	10648	221357	84803	93082	9751	388115	54763	8645
535	Pfefferle2012_MaSC_PMID.25575446	Median Expression	PMID.25575446	1308	8626	3038	57451	667	4638	27122	4345	80206	5268	5021	2078	84951	72	3852	347902	9938	3909	83857	4855	130733	3084	11122	23213	3655	79623	2268	2263	8714	148641	2621	1012	91624	374946	4908	4129	3861	4717	9413	8614	10512	4674	182	81029	55901	1592
536	Pfefferle2012_MatureLum_PMID.25575446	Median Expression	PMID.25575446	120224	10538	3169	79838	374	56521	56892	10551	9245	54843	55359	51280	9723	79083	92291	27324	36	2203	22998	2066	201895	10519	720	388743	5167	7802	4602	253012	161835	195814	23555	1501	22996	55653	255394	126353	155465	9	6659	8564	222484	5409	55173	6777	143098	222171
537	Pfefferle2012_Stroma_PMID.25575446	Median Expression	PMID.25575446	4319	1634	6387	4321	4060	1281	9839	6423	1910	1513	2192	1293	3569	5159	3075	286133	8406	4239	2191	4327	6913	623	185	1675	8490	23704	7291	3598	3082	25960	5156	387763	84870	94031	3479	7412	4312	10418	1514	11211	4969	4489	1278	216	2669	10417
538	PIK3CA.Hutti_Cancer.Res.2012_PMID.22552288	Median Expression	PMID.22552288	72	241	273	641	699	768	891	1033	1123	1164	1407	1503	1719	1841	1848	1869	1879	2119	2167	2171	2258	2273	2357	2553	2633	2791	2919	2921	3091	3157	3161	3162	3224	3251	3418	3487	3569	3576	3638	3772	3848	3854	3885	3910	4001	4057
539	PR_Isoform_Ratio_Up_in_PRA_H_JNCI.2017_PMID.28376177	Median Expression	PMID.28376177	4250	338821	10143	442038	10647	3698	5179	260436	126410	54490	10568	9576	5764	4246	64850	29991	2255	213	11197	22854	2888	11283	27190	10720	7368	342667	8788	152110	54997	3547	5178	8190	2173	100169890	2568	90293	9077	375611	57604	785	3673	157695	3709	57633	347475	10098
540	PR_Isoform_Ratio_Up_in_PRB_H_JNCI.2017_PMID.28376177	Median Expression	PMID.28376177	9607	1473	6318	3853	10321	388468	4583	57094	388533	5266	286887	653499	6700	23532	1360	6317	64090	138046	51458	23544	11005	6704	6699	3868	2852	5004	8581	10804	127943	6703	2914	374897	145978	8534	3848	51617	283869	4745	2046	7490	1470	129807	26525	440224	51806	7780
541	Proliferation_Cluster_BMC.Med.Genomics.2011_PMID.21214954	Median Expression	PMID.21214954	10376	26255	9793	699	55635	54821	8317	9141	1054	1515	22948	54069	5888	4176	51659	55969	5688	11047	10213	10051	79801	9582	1869	8318	1062	51512	4605	3015	51514	9768	27338	83461	1894	55143	23397	10635	56992	10615	9700	4288	4751	7153	1033	6241	11130	3832
542	Prosigna_Proliferation_18_BMC.Med.Genomics.2015_PMID.26297356	Median Expression	PMID.26297356	54443	898	991	990	83540	1063	55165	9156	11004	10403	9833	4288	23594	9232	6241	7298	11065	29089
543	RB_LOH_Breast.Cancer.Res.2008_PMID.18782450	Median Expression	PMID.18782450	983	1164	2146	4085	4751	5984	6241	7153	7272	9055	699	1033	1058	3925	4436	5888	7298	54443	81620	113130	990	2237	2305	5885	8318	9319	24137	55143	890	1111	3619	3832	3833	4173	4288	4851	5982	5985	9787	11169	23234	23594	26586	51053	63979	1503
544	RB_LOSS_J.Clin.Invest.2007_PMID.17160137	Median Expression	PMID.17160137	5885	672	1894	3832	10051	11073	6790	10112	995	891	991	55143	11004	332	8318	83461	9055	9133	4288	5888	113130	23397	7272	9493	699	1058	890	6241	9319	2146	4085	7153	10635	7298	5111	3148	2237	4751	1164	1111	990	51053	63979	7112	6941	699
545	REPLICATION_STRESS_NEG_Cell.Rep.2018_PMID.29768207	Median Expression	PMID.29768207	1535	5918	3486	6275	10232	218	6278	4582	12	794	4256	57016	6947	6286	1545	100134265	8644	8714	629	1346	29803	1109	8942	441282	51523	1672	8000	114897	3205	970	5069	54749	114783	79153	290	25797	55603	2167	768	260293	1066	1646	65108	1675	387568	6364
546	REPLICATION_STRESS_POS_Cell.Rep.2018_PMID.29768207	Median Expression	PMID.29768207	90139	121551	8601	55734	57718	8900	3221	5029	8990	112464	8480	25945	1434	118429	121273	7280	6665	9570	654121	65981	5238	652846	1272	11065	4494	3673	116092	3265	3556	29107	414305	728113	10257	7170	81849	4131	56924	6790	8465	284348	11199	10620	1947	5645	115825	4501
547	Response_to_PARP_inhibitor_olaparib_Resistance_BC_Res_Treat_2012_PMID.22875744	Median Expression	PMID.22875744	672	4361	4683	6996	7507
548	Response_to_PARP_inhibitor_olaparib_Sensitivity_BC_Res_Treat_2012_PMID.22875744	Median Expression	PMID.22875744	11200	9261
549	Ribosomal_Cluster_BMC.Med.Genomics.2011_PMID.21214954	Median Expression	PMID.21214954	6235	6227	6181	6234	6165	7178	6169	6168	6205	6176	4666	6206	3646	6224	6156	6188	11224	6155	6207	6152	6141	29997	6137	6124	6135	6203	6161	6167	6136	6194	6202	6125	6191	6138	4736	6133	10399	6187	6122	25873	6223	6217	8665	6160	6210	6204
550	S100A9_A8_BMC.Med.Genomics.2011_PMID.21214954	Median Expression	PMID.21214954	7088	51806	2678	10200	7103	9635	26154	59272	5142	2528	2525	6364	1356	8564	6999	3929	3934	6280	6279	445	10158	8942	6590	5266	6664	3898	55503	23475	3855	9060	1317
551	Secretoglobin_BMC.Med.Genomics.2011_PMID.21214954	Median Expression	PMID.21214954	4246	4250	10647	51280	80150	10648
552	Shehata2012_ALDHneg_PMID.25575446	Median Expression	PMID.25575446	4250	6590	3815	79949	10647	5284	4246	9073	760	2001	283491	260293	123036	64078	1525	1360	1356	256356	120	132671
553	Shehata2012_ALDHpos_PMID.25575446	Median Expression	PMID.25575446	5266	260436	6280	6279	10562	6318	4316	8710	2173	2568	5918	3887	6590	220	728715	4057	5284	6317	6663	3815	1543	8842	8424	79949	3934	1515	9073	8942	6947	84171	57447	3866	9982	6422	10568	9076	10516	1591	83988	6291	94025	1827	2001	93082	84419	56477
554	Shehata2012_Basal_PMID.25575446	Median Expression	PMID.25575446	72	1308	59	3861	6876	27122	3852	3872	441019	3038	3854	2	4495	5021	644314	7169	4501	8626	4493	4489	50805	667	83700	894	117195	4502	165	1410	2995	4855	4638	114907	4629	857	5268	5621	5010	25999	25891	347733	1825	8714	2621	374946	558	5627
555	Shehata2012_Erbb3neg_PMID.25575446	Median Expression	PMID.25575446	1117	64127	53917	139741	202299	56977	8324	125144	283130	54059	29997	643433	85006	9722
556	Shehata2012_LumProg_PMID.25575446	Median Expression	PMID.25575446	4316	260436	5266	6280	6590	728715	6279	10562	5284	2173	4250	8710	2568	6318	79949	3815	8942	8842	4057	6289	2001	6663	6291	5918	3887	9073	1117	93082	1543	220	100133941	6288	1672	1591	9076	3934	4067	57447	8424	6317	3866	92304	1365	56477	152007	83988
557	Shehata2012_NCL_PMID.25575446	Median Expression	PMID.25575446	91074	56892	56521	3169	79083	80303	80223	4604	118430	7035	64284	7020	54843	7033	10538	1917	563	644151	3315	4582	1528	7351	92291	9518	1287	6542	5004	481	4214	7052	27289	22998	629	158158	84689	94009	6376	240	7357	201895	80162	57535	150696	10519	24	79838
558	Shehata2012_Stroma_PMID.25575446	Median Expression	PMID.25575446	387763	1675	7058	5159	4314	1293	3569	4060	633	8406	6515	55384	1282	1514	1281	347	10468	8788	5179	2192	10630	1278	84935	4239	57007	1513	83716	220323	1290	5396	25890	6678	3489	4319	1910	7130	5743	1634	10409	2669	2199	2318	10457	7291	9945	7077
559	Shipitsin_CD44_A_Cancer.Cell.2007_PMID.17349583	Median Expression	PMID.17349583	308	71	377	483	7917	800	116985	1192	1192	1486	1809	1857	2131	2260	2512	10399	9052	3015	3091	3597	11014	23367	9663	4141	4319	4323	4502	4651	23636	5209	5352	5695	5714	54453	23429	51150	55209	6696	6780	10381	27338	7511
560	Shipitsin_CD44_B_Cancer.Cell.2007_PMID.17349583	Median Expression	PMID.17349583	51099	23394	537	10538	694	7832	54862	1213	27292	60481	3659	4048	51237	55558	64777	27131	11138
561	Spike2012_aMaSC_PMID.25575446	Median Expression	PMID.25575446	978	57158	59271	8291	360	7169	402778	27190	11170	348938	169693	2877	1241	134	684	83959	79153	9636	203427	3352	8626	223075	3779	7378	6900	51554	116159	11082	11067	100130519	5265	10561	54922	91683	57451	27111	84951	115572	90332	22915	55034	55652	80326	3574	221393	5696
562	Spike2012_fMaSC_PMID.25575446	Median Expression	PMID.25575446	140683	7368	9073	4118	2001	57348	116173	5365	11061	80059	212	4099	230	79370	2568	222553	26298	26576	143662	5588	349149	5354	131096	10202	160728	4155	81706	9915	90523	1297	11226	4359	2676	1448	341640	25928	9729	9283	4883	80070	2299	3507	4324	129642	389941	80864
563	Spike2012_fStr_PMID.25575446	Median Expression	PMID.25575446	6474	761	651	3090	431707	3764	7035	203447	5737	8490	6356	285195	165215	55757	23460	10486	8418	8829	55901	388815	8277
564	STAT1_Breast.Cancer.Research.2008_PMID.19272155	Median Expression	PMID.19272155	6890	2633	64135	5698	4283	3659	6373	3627	3620	6772
565	STAT3_Basal_Horvath_PNAS.2014_PMID.25139989	Median Expression	PMID.25139989	1830	8581	8744	6398	2995	84230	355	4794	2015	3383	7096	7097	6518	101	1890	976	5272	330	864	3601	3134	6891	51513	3559	6352	4050	5293	3718	923	124460	9447	117289	26191	150365	441168	9473	10537	9235	169355	255231	197259	1535	8986	254102	200315	10019
566	STAT3_Basal_Horvath_SHORT_PNAS.2014_PMID.25139989	Median Expression	PMID.25139989	8744	6398	2995	84230	355	4794	2015	3383	7096	7097	6518	101	1890	976	5272	330	864	3601	3134	6891	51513	3559	6352	4050	5293	3718	923	124460	9447	117289	26191	150365	441168	9473	10537	9235	169355	255231	197259	1535	8986	254102	200315	10019	84034	27350
567	Stingl_Day7_Downregulated_Nat.Cell.Biol.2014_PMID.25173976	Median Expression	PMID.25173976	1116	3488	4629	4638	8572	27295	72	114907	25984	51285	3934	5166	1634	23336	10398	83716	7052	6876	23462	6663	1298	467	5549	84417	633	8324	59	6376	133	348	7018	140862	1907	51129	3437	1628	2633	23237	8613	165	9518	6515	58473	8660	1846	5507
568	Stingl_Day7_Upregulated_Nat.Cell.Biol.2014_PMID.25173976	Median Expression	PMID.25173976	3854	11202	3853	6699	255324	11009	388533	23166	93099	64943	285973	414325	5173	284254	54361	374	8581	332	1033	154141	5473	595	5655	891	1159	6790	51200	900	63979	5347	9768	441478	81788	221143	4047	6241	51645	64976	26227	4085	10573	7136	2237	80152	84283	360
569	Stingl_Down_Basal_High_Nat.Cell.Biol.2014_PMID.25173976	Median Expression	PMID.25173976	6663	5806	1116	3866	25984	72	8324	6376	8190	23336	83439	53826	114907	54206	342667
570	Stingl_Down_CLOW_High_Nat.Cell.Biol.2014_PMID.25173976	Median Expression	PMID.25173976	5166	710	1282	1284	3672	7070	133	51129	4311	2006	59	70	6876	1490	1634	6387	9509	84935	8082	10335	4629	2934	55679	10398	8613	83716	6347	467	64651	23645	23764	9510	84417	10580	55084	8572	2719	7018	4616	51285	57664	64115	10628	23710
571	Stingl_Up_Basal_High_Nat.Cell.Biol.2014_PMID.25173976	Median Expression	PMID.25173976	3783	3868	244	3853	3854	5655	11202	8581	26227	7136
572	Stingl_Up_Proliferation_Nat.Cell.Biol.2014_PMID.25173976	Median Expression	PMID.25173976	4521	5985	9585	39	2618	1841	3619	1033	2237	891	6241	641	5888	4605	332	10615	8318	57405	56992	11004	6790	7298	9768	4085	55010	90417	10926	51155	55388	11164	9837	51256	51645	7037	151195	54069	63979
573	Stromal_Central_Fibrotic_Focus_J.Pathol.2017_PMID.27861902	Median Expression	PMID.27861902	57505	80221	56894	334	534	353500	79783	55262	157777	55837	9775	100131454	283635	64599	23308	9692	147804	4292	255027	51264	50863	5116	5164	29951	441531	55718	54700	56996	6660	7980	389898	56061	27300
574	Stromal_Down_Nat.Med.2009_PMID.19648928	Median Expression	PMID.19648928	653499	445328	166815	286077	403313	222584	259173	349565	30844	93517	388228	65990	375790	11187	137682	340542	119391	132299	127602	85462	441294	153769	60528	163732	256281	150696	219738	158584	27293	51629	81539	23779	148304	347735	284348	117177	161497	115572	338707	374378	59344	254427	157638	112724	65062	29984
575	Stromal_Inflammation_J.Pathol.2017_PMID.27861902	Median Expression	PMID.27861902	1493	27436	50943	2633	9812	11040	23231	9047	56833	201633	79413
576	Stromal_Signature_Nat.Med.2008_PMID.18438415	Median Expression	PMID.18438415	3001	925	28611	1043	919	962	5341	864	55340	3936	2151	30061	2487	10742	3206	9358	4969	54079	150	9547	6696	57110	51442	133	84553	54221
577	Stromal_Up_Nat.Med.2009_PMID.19648928	Median Expression	PMID.19648928	441531	286223	169611	414062	389558	222865	353376	30820	94240	266727	64764	205860	253738	375611	11237	245812	118429	152330	348093	200810	343450	85413	196740	134285	140893	149111	137392	341032	60681	167359	158326	160419	58494	145581	128077	113091	24146	27319	81796	51762	124637	162494	440097	147906	130271	164832
578	T_cell_activation_PMID.31942077	Median Expression	PMID.31942077	4283	3627	3458	3600	58191
579	T_Cell_cluster_Iglesia_CCR.2014_PMID.24916698	Median Expression	PMID.24916698	100188949	8530	9806	2672	497189	140947	5133	11184	9051	11151	11262	115352	29851	1493	4283	56253	9840	729230	959	952	57823	3662	54900	387751	84636	256380	151888	925	3003	29909	128611	5790	374403	10663	4063	9744	27240	201633	3932	55423	919	84174	3702	10225	4068	921
580	T_regulatory_cell_2gene_PMID.31942077	Median Expression	PMID.31942077	50943	8784
581	T_RM_Cell_single_cell_signature_Savas_Nat_Med.2018_PMID.29942092	Median Expression	PMID.29942092	199	356	444	478	486	925	926	928	952	953	967	1124	1130	1230	1234	1521	1627	2115	2171	2494	2530	2589	2590	2793	2820	2975	2999	3001	3002	3117	3119	3122	3123	3127	3162	3458	3672	3673	3695	3805	3821	3822	3824	3887	3892	3902
582	Taube_EMT_down_PNAS.2010_PMID.20713713	Median Expression	PMID.20713713	728113	386757	553158	286887	161291	653562	260294	126353	90355	30836	64848	11313	116984	151230	85377	548596	157567	60487	23779	114884	51765	58516	81875	285527	83481	259173	27351	29984	28231	29094	57834	81034	84951	80324	653145	64284	55966	2263	51018	54103	4293	79101	8140	81579	26207	80746
583	Taube_EMT_up_PNAS.2010_PMID.20713713	Median Expression	PMID.20713713	732160	445815	100132406	284119	653354	376267	145389	221749	253461	115123	201134	30851	94239	66008	11337	644504	138151	57863	439921	85360	51763	729580	642236	81618	29058	27246	24138	92689	90806	112950	64792	80023	57198	56034	79178	89797	81029	114327	83604	84861	23741	84263	64393	92335	4329	63826
584	Tcell_EXH_Anti_PDL1_vs_control_treated_exhausted_CD8_T_cell_Metagene_1_Science.2016_PMID.27789795	Median Expression	PMID.27789795	65987	2766	3428	7444	55803	84875	27074	6672	25865	8775	51296	127544	355	715	7318	6373	1267	116071	3601	55013	10865	84930	201176	94240	10135	29126	3659	57169	83666	54625	129607	115361	4283	941	57162	85463	9753	51365	256586	26750	3574	79370	602	834	64853	388646
585	Tcell_EXH_Effector_CD8_T_cell_at_day_8_p.i_Armstrong_vs_Naive_CD8_T_cell_Metagene_1_Science.2016_PMID.27789795	Median Expression	PMID.27789795	967	4635	5355	411	84868	56925	952	158219	5359	8411	54502	10549	2745	840	3559	824	79180	4783	22822	5734	1326	6351	5341	57823	84419	197259	23710	1493	307	196383	5996	214	50515	125488	26031	116496	6310	493	201633	8836	2012	5272	11034	29887	639	2591
586	Tcell_EXH_Exhausted_CD8_T_cell_vs_Naive_CD8_T_cell_Metagene_1_Science.2016_PMID.27789795	Median Expression	PMID.27789795	118788	7227	942	2650	941	929	952	57823	29992	80219	4067	55300	3552	5272	3606	10410	55281	3601	1390	10950	64135	3627	153020	84419	221079	91543	9246	629	3600	8676	51296	3669	6648	840	8743	9636	10581	3587	219972	10561	23429	79931	2820	84930	338339	64108
587	Tcell_EXH_Exhausted_CD8_T_cell_vs_Naive_CD8_T_cell_Metagene_3_Science.2016_PMID.27789795	Median Expression	PMID.27789795	3001	30009	3897	3458	3683	54843	50515	10219	3672	10663	8809	23191	6284	3903	3092	29887	5795	3915	5551	8411	2207	356	4644	158219	54476	56994	960	493869	81615	214	23710	2149	2833	64065	9497	8807	22936	1231	6118	93663	3821	195	639	53637	22837	79158
588	Tcell_EXH_Memory_CD8_T_cell_a_vs_Naive_CD8_T_cell_Metagene_1_Science.2016_PMID.27789795	Median Expression	PMID.27789795	256586	55450	1154	5269	4953	8784	1493	29969	7133	8810	9446	2012	824	56253	140738	837	834	5167	115361	8553	1234	10402	3398	79180	8530	9047	11126	8829	8993	84525	8809	356	2833	3458	6352	3001	3003	1231	10219	5243	123	6645	836	10549	3587	23258
589	Tcell_EXH_Memory_CD8_T_cell_a_vs_Naive_CD8_T_cell_Metagene_2_Science.2016_PMID.27789795	Median Expression	PMID.27789795	11238	29851	57105	22856	23092	2769	118788	23075	953	8524	23710	27120	94120	6310	493	201633	54836	54843	598	26031	245972	411	54476	79158	27293	11082	2081	2591	125488	389072	5576	7703	51201	2151	10663	5795	3903	6118	3897	3672	22837	960	5214	4542	6095	195
590	Tcell_EXH_Memory_CD8_T_cell_a_vs_Naive_CD8_T_cell_Metagene_3_Science.2016_PMID.27789795	Median Expression	PMID.27789795	941	23670	3559	3662	6504	10538	64092	112574	81553	3555	22936	7227	952	5606	5272	4860	3627	3600	3665	64135	11274	5341	366	153020	5966	11080	23429	3606	10260	8444	221079	9693	80149	56300	8767	1647	10950	29933	1326	255231	3475	54206	597	8870	1847	9034
591	T-cells_MCP_PMID.31942075_PMID.31942077	Median Expression	PMID.31942075|PMID.31942077	940	915	917	921	923	100506915	1493	2323	29851	4118	348035	80714	55423	387357	8718	50852
592	TCGA.BRCA.1198_BASAL_JCI.2020_PMID.32573490	Median Expression	PMID.32573490	8842	10568	139411	11197	5803	22802	285016	6530	7368	9982	90019	5317	4316	399694	51442	6285	2835	1828	11254	130497	57348	79192	3868	3853	286887	6273	342667	81706	2568	6663	8190	6422	54763	152015	25818	5650	5653	11202	1830	3854	3861	3852	3872	1825	653145	244
593	TCGA.BRCA.1198_Chromogranin_JCI.2020_PMID.32573490	Median Expression	PMID.32573490	57540	9699	3746	9024	55753	8120	7425	2786	6861	83546	654429	112885	3777	29106	1113	1114	1141	5122	6616	51617	124925	10900	83482	23025	256472	478	610	333	58512	3757	22983	6543	253982	26470	146664	57595	2775	285175	7448	84063	4868	56853	286	5799	768097	768096
594	TCGA.BRCA.1198_COLLAGEN11A_JCI.2020_PMID.32573490	Median Expression	PMID.32573490	170690	1833	9622	1311	4322	1301	1300	4320	196051	131578	79953	54829	2706	25769	10699	283867	579	2825	57214	57471	26585	24141	2922	27254	10468	4148
595	TCGA.BRCA.1198_EN1_FDZ9_JCI.2020_PMID.32573490	Median Expression	PMID.32573490	9568	93273	144568	419	3595	29968	83879	8326	115019	2019	8645
596	TCGA.BRCA.1198_FGFR4_EGF_JCI.2020_PMID.32573490	Median Expression	PMID.32573490	195814	5225	3026	2267	7103	4588	257407	5625	259	5409	8557	2264	10720	6549	56165	246	10321	389434	725	2705	23491	1950	135250	10	56914	80168	3694	1428	58511	148418	26280	1244	85442	84258	51270	127665
597	TCGA.BRCA.1198_HISTONES_JCI.2020_PMID.32573490	Median Expression	PMID.32573490	92815	8355	8345	3007	8339	3012	8351	8357	8336	8365	8343	26212	8348	8969
598	TCGA.BRCA.1198_HOXC11_HOTAIR_SIX1_JCI.2020_PMID.32573490	Median Expression	PMID.32573490	8000	6495	11045	3110	3227	100124700	3226	3229	440101	3775	25805	100133941
599	TCGA.BRCA.1198_IL8_CCL_JCI.2020_PMID.32573490	Median Expression	PMID.32573490	3576	4312	4318	4321	165904	8685	6362	6354	366	3101	199675	11026	2358	6355	200315	4317	116211	81501	6696	54210	117247
600	TCGA.BRCA.1198_immune_CD19_JCI.2020_PMID.32573490	Median Expression	PMID.32573490	8115	79368	930	640	1269	931	84824	5079
601	TCGA.BRCA.1198_immune_CD34_TIE1_JCI.2020_PMID.32573490	Median Expression	PMID.32573490	54810	6403	5243	9452	22915	6358	857	6886	79843	22918	2078	947	1003	80177	1901	7075	10252	128553	5168
602	TCGA.BRCA.1198_immune_CD4_CD53_CD84_BTK_JCI.2020_PMID.32573490	Median Expression	PMID.32573490	221472	257106	1536	8832	22797	313	3394	1234	2124	695	920	963	5341	1794	3071	3937	2533	5788	10320	3587	3594	64333	54440	5778	124460	6693	388325	89857	64092	23533	286336	951	199	7940	79626	3059	27128	4542	83706	6688	7454	4689	64098	6404
603	TCGA.BRCA.1198_immune_CD8_GZMK_JCI.2020_PMID.32573490	Median Expression	PMID.32573490	729230	497189	1236	2672	387357	84636	387751	10666	959	115352	5133	100188949	120425	9840	56253	8320	283897	5579	22914	256380	29851	201633	29909	151888	128611	925	10663	154075	50852	3003	149628	30009	3001	939	4063	6504	4068	114836	917	3702	10225	55423	53347	3932	2833	27240
604	TCGA.BRCA.1198_immune_CTLA4_CXCL_FOXP3_JCI.2020_PMID.32573490	Median Expression	PMID.32573490	1493	6373	3627	4283	3604	50615	56833	50943	3620	94240	2633
605	TCGA.BRCA.1198_immune_FOS_JUN_IL6_JCI.2020_PMID.32573490	Median Expression	PMID.32573490	8013	3569	9021	467	1959	64651	1843	1958	2354	7538	3164	3725	1839	23645
606	TCGA.BRCA.1198_immune_GIMAP_IL16_JCI.2020_PMID.32573490	Median Expression	PMID.32573490	54518	55843	1439	9938	170371	1193	2313	55303	168537	474344	55340	4242	139716	7133	4033	10875	219972	3635	3603
607	TCGA.BRCA.1198_immune_HLA_A_F_JCI.2020_PMID.32573490	Median Expression	PMID.32573490	3133	116071	3659	81030	3902	3107	3105	3106	3134	5698	5696	6890	3965	3601	197259
608	TCGA.BRCA.1198_immune_HLA_D_JCI.2020_PMID.32573490	Median Expression	PMID.32573490	972	3108	3109	3122	3115	3113
609	TCGA.BRCA.1198_immune_INTERFERON_JCI.2020_PMID.32573490	Median Expression	PMID.32573490	10379	24138	51191	55008	55601	54809	3429	2537	9636	23586	64135	3434	10561	10964	3433	3437	129607	91543	4939	4599	8638	4938	4940	54625	83666	6772	11274	54739	4600	64761	5359	9246	6672	3431
610	TCGA.BRCA.1198_IMMUNE1_JCI.2020_PMID.32573490	Median Expression	PMID.32573490	952	9834	973	83416	5450	96610	608	8755	3662	54900	389643
611	TCGA.BRCA.1198_IMMUNOGLOBULIN_PMID.26451490	Median Expression	PMID.26451490	28904	28467	28875	28426	28776	28474	28919	28424	28923	28874	28420	28784	28423	28817	28937	28457	28876	28943	28778	28400	28396	28793	28434	28391	28941	28938	28935	28408	28394	28797	28914	28395	28465	28809	28450	28822	28448	28933	28468	28388	28813	28921	28444	28815	28893	28392
612	TCGA.BRCA.1198_LUMINAL_JCI.2020_PMID.32573490	Median Expression	PMID.32573490	143941	2674	5241	256394	100128977	4137	100130148	1556	149563	64084	8537	10103	1602	388743	3899	7031	56521	9	57758	399717	2066	7802	161835	123099	145837	80736	7033	10551	3169	25803	79083	222171	155465	771	2099	80129	23158	196993	79875	2625	27202	8416	123872	51364	25876	90288
613	TCGA.BRCA.1198_MYBL2_APOBEC3B_JCI.2020_PMID.32573490	Median Expression	PMID.32573490	6999	348738	84733	55771	4605	11065	332	9833	9088	9928	79733	57116	9582
614	TCGA.BRCA.1198_NORMAL_JCI.2020_PMID.32573490	Median Expression	PMID.32573490	1511	1215	7079	4653	26577	56301	7140	1776	729	85329	2662	10840	2277	221476	286133	91851	64102	5105	5950	146894	3952	2167	9370	286753	63924	2819	5346	364	1149	400258	729359	125	124	10249	30819	283392	80704	92293	375719	3991	220296	641654	80760	126393	5959	50486
615	TCGA.BRCA.1198_NORMAL2_JCI.2020_PMID.32573490	Median Expression	PMID.32573490	146556	7069	368	653190	400830	5207	112817	6258	6623	10974
616	TCGA.BRCA.1198_PDCHA_MANY_JCI.2020_PMID.32573490	Median Expression	PMID.32573490	56136	56139	56142	56137	56138	56147	56144	56145	56146	56143	56101	8641	56104	56128	56133	56106
617	TCGA.BRCA.1198_S100A7_8_9_JCI.2020_PMID.32573490	Median Expression	PMID.32573490	342897	3934	6278	6279	6280	55350	56169	6364	374897	10804	84290	390928	51200
618	TCGA.BRCA.1198_TP63_JCI.2020_PMID.32573490	Median Expression	PMID.32573490	6854	2670	79645	1908	10218	150572	3753	27190	84889	27065	57144	2893	84417	1308	149461	8626	84659	4629	1264	728264	25891	5010	389432	4804	85480	5764	256691	11131
619	TCGA.BRCA.1198_UNKNOWN1_JCI.2020_PMID.32573490	Median Expression	PMID.32573490	153643	133690	166979	2302	80122	127003	83853	136288	84229	147744	100130933	440585	92749	132203	254956	134121
620	TCGA.BRCA.1198_UNKNOWN2_JCI.2020_PMID.32573490	Median Expression	PMID.32573490	6332	7060	63923	2151	8483	11081	10234	6424	3481	1359	2206	64499	7177	6571	946	148823	9173	6003
621	TCGA.BRCA.1198_UNKNOWN3_JCI.2020_PMID.32573490	Median Expression	PMID.32573490	10085	1272	223117	80243	128553	781	80114	6792	643314	8516	120114	93986	56113	56111	56110	80034	8633
622	TCGA.BRCA.1198_UNKNOWN5_JCI.2020_PMID.32573490	Median Expression	PMID.32573490	8938	377841	375791	124093	84264	79006	25837	9028	1396
623	TCGA.BRCA.1198_UNKNOWN6_JCI.2020_PMID.32573490	Median Expression	PMID.32573490	3158	247	646424	3081	26154	7021	9723	203447	145741	388125	5083	5169	79820	2220	79962
624	TCGA_CHANG_CORE_SERUM_RESPONSE_UP_Immunity.2018_PMID.29628290	Median Expression	PMID.29628290	84131	27258	55631	9263	6184	3726	79902	2318	3151	10799	29796	7965	1111	51534	11340	79172	56902	6566	79084	51465	51491	4521	10592	292	9818	8847	11333	56267	10063	56647	5340	85397	6631	10733	10204	25804	6611	10969	93081	7416	10213	26292	64750	2791	2152	3575
625	TCGA_CSF1_response_Immunity.2018_PMID.29628290	Median Expression	PMID.29628290	11151	4332	9034	9056	3108	2533	6039	7097	1075	11006	9595	1520	83937	4478	1536	7805	1794	2209	2124	113	962	55843	409	6850	695	7128	2212	11326	2359	3587	3428	3689	3575	6916	752	2313	9770	4069	9332	976	6347	2213	10461	8832	963	942
626	TCGA_LIexpression_score_Immunity.2018_PMID.29628290	Median Expression	PMID.29628290	6352	930	951	915	916	917	919	973	974	925	926	3502	28219	3512	3537	28840	929	3932	4050	931
627	TCGA_Module3_IFN_score_Immunity.2018_PMID.29628290	Median Expression	PMID.29628290	10561	10964	23586	2537	3429	3433	3434	3437	8375	8374	8376	3627	4599	4938	4939	4940	51191	54809	55008	55601	64108	64135	6772	6890	8638	91543	9636
628	TCGA_Tfh_cells_Immunity.2018_PMID.29628290	Median Expression	PMID.29628290	27087	643	753	8851	1114	1117	10563	23462	8362	3382	8645	57535	4094	28986	57496	4646	4647	23178	5133	10585	5783	5816	54436	55423	56301	4086	7972	6489	27347	63892	9760	7253	92595
629	TCGA_Tgd_cells_Immunity.2018_PMID.29628290	Median Expression	PMID.29628290	10485	11126	9638	445347	6964	6983	28531
630	TCGA_TGFB_score_21050467_Immunity.2018_PMID.29628290	Median Expression	PMID.29628290	4314	65108	3482	3912	6678	2335	3676	6608	4327	3696	3678	4811	7076	6405	23433	1499	4313	5054	2048	1307	1969	3371	3728	3675	6934	1281	1004	7482	8754	1832	3339	392	3693	3488	396	4035	3485	1495	10234	4323	4756	1946	3690	2049	960	3487
631	TLS_Hallmark_Gene_Signature_PMID.31942071	Median Expression	PMID.31942071	6363	6366	10563	1236	643	27074	6402
632	TLS_Known_MARKERS_PMID.31942071	Median Expression	PMID.31942071	1236	10563	6363	7852	6366	27074	942	604	6402
633	TLS_New_9Gene_Signature_PMID.31942071	Median Expression	PMID.31942071	5730	912	974	1235	27040	1071	83758	9086	8631
634	TLS_tumors_w_TLS_and_CD8_v_CD8alone_PMID.31942071	Median Expression	PMID.31942071	962	4050	1043	915	6402	80342	939	51316	9595	973	1236	974	4033	952	3957	917	919	3512	330	51237	6363	8875	6366	730	5790	3112	3394	923	27040	912	5730	971	54923	1235	7351	54900	64333	374403	81704	11040	9086	54855	1776	5777	5336	8631
635	TNBC_Clinically_Relevant_Good.230_BCR.2011_PMID.21978456	Median Expression	PMID.21978456	8339	8924	3853	5026	861	4018	6728	3013	1485	4101	1595	3694	51326	95	4837	4763	3576	6319	360	5054	116372	5230	10484	8976	23213	6696	54210	9245	3422	23174	51029	7169	26585	6515	3156	57214	50507	4319	133	7057	3556	4860	335	4015	6617	7045
636	TNBC_Clinically_Relevant_Good.26_BCR.2011_PMID.21978456	Median Expression	PMID.21978456	18	276	277	278	279	280	355	356	655	2550	2843	2999	3500	3501	3507	3514	3537	3736	3824	4283	6375	6752	6846	7551	7915	10537	10730	23175	23580	28396	50802	54997	55715	80833	648740	102465871	102466889
637	TNBC_Clinically_Relevant_Poor.26_BCR.2011_PMID.21978456	Median Expression	PMID.21978456	3576	6319	360	5054	116372	5230	10484	8976	8339	23213	6696	54210	9245	3422	23174	4101	51029	7169	26585	6515	8970	266740
638	Troester_Wound_Signature_Clin.Cancer.Res.2009_PMID.19887484	Median Expression	PMID.19887484	124	350	658	667	827	942	1019	1308	1349	1440	1490	1513	1755	1820	1825	1991	2070	2152	2167	2191	2192	2202	2357	2487	2709	3043	3067	3159	3241	3491	3553	3598	3620	3624	3853	3854	3885	3899	3909	3918	4053	4060	4477	4538	4838	4969
639	Tumour_hypoxia_causes_DNA_hypermethylation_by_reducing_TET_activity_Nature.2016_PMID.27533040	Median Expression	PMID.27533040	226	4282	84617	5033	6513	5223	2023	3939	1033	7167	10397	7422	11332	133
640	Unknown_1_BMC.Med.Genomics.2011_PMID.21214954	Median Expression	PMID.21214954	1639	6774	5725	5970	10419	9526	1398	28952	1025	23193	10093	3241	55851	8775	55643	11140	5315	2193	8407	389	2783	375	29959	8079	64834	79033	2597	2023	23646	5226	1209	4924	10945	5702	6182	5034	2873	396	682	5434	826	439	10963	11282	3326	5518
641	Unknown_10_BMC.Med.Genomics.2011_PMID.21214954	Median Expression	PMID.21214954	3418	57099	3939	8974	55577	10567	54732	5832	10954	29927	6184	22820	58477	10970	55076	9500	6396	26003	11014	9276	11015	10652	5479	2923	1611	56681	7922	2987	2677
642	Unknown_11_BMC.Med.Genomics.2011_PMID.21214954	Median Expression	PMID.21214954	5704	10072	11284	23640	55011	51070	79042	79171	1155	10430	5438	1340	10856	10155	4696	27243	5693	8409	54539	10575	10574	4702	5537	81873	5695	51116	23203	25920	8636	10383	3028	2539	9130	8260	9131	537	10134	5425	8662	29960	7965
643	Unknown_12_BMC.Med.Genomics.2011_PMID.21214954	Median Expression	PMID.21214954	23052	65985	10579	476	9771	54682	4862	6523	634	26298	1950	8470	1836	956	360	26286	2762	4041	10279	54494	29087	27034	399979	24145	10929	9440	9183	3703	6768	55216	3145	1662	9354	2230	51399	372	1798	10525	79796	9538	83480	25996	25988	60496	28960	6734
644	Unknown_13_BMC.Med.Genomics.2011_PMID.21214954	Median Expression	PMID.21214954	51101	2260	10947	54904	80223	55290	11212	27257	23259	9070	11160	51125	7419	2339	55145	5423	9530	7994	6575	26353	10267	55766
645	Unknown_14_BMC.Med.Genomics.2011_PMID.21214954	Median Expression	PMID.21214954	5889	51096	9110	9368	2232	51321	3993	8405	10241	516	11143	10237	5245	11267	65264	8493	10513	55181	4591	10238	63897	6198	51651	6603	117246	5705	51204	57003	5718	25926	11011	30850	51155	3396	10476	51081	29115	6827
646	Unknown_15_BMC.Med.Genomics.2011_PMID.21214954	Median Expression	PMID.21214954	177	3816	9496	64180	9376	8128	1369	1539	84779	6869	8844	1089	7849	2978	6928	9001	4640	2692	6792	85360	79946	6900	5630	7348	80852	5648	2902	56891	25819	55507	54866	10332	3172	2840	7135	9427	56302	29114	5545	9381	4842	9754	54538	6886	23434	1444
647	Unknown_16_BMC.Med.Genomics.2011_PMID.21214954	Median Expression	PMID.21214954	55186	23099	2932	23476	27333	58517	10725	6095	9169	2801	1108	5170	29855	4782	8943	57187	51319	29123	8976	1455	1981	7707
648	Unknown_2_BMC.Med.Genomics.2011_PMID.21214954	Median Expression	PMID.21214954	51479	57337	523	55002	79038	5663	54842	26092	81847	56650	10203	3998	8301	51715	1635	10099	2747	2746	51313	23530	1654	23394	7520	5093	5025	5781	10159	2799
649	Unknown_3_BMC.Med.Genomics.2011_PMID.21214954	Median Expression	PMID.21214954	9337	3185	102	9341	387	3312	51573	4076	51397	51164	5573	81555	10558	51068	29058	10959	51714	821	23473	79718	81542	9375	6856	8763	57515	51495	4089	9802
650	Unknown_4_BMC.Med.Genomics.2011_PMID.21214954	Median Expression	PMID.21214954	54014	8481	79609	9765	26054	10464	28981	9987	55769	22889	10915	65981	5411	9295	55082	57018	4820	25957	23360	57396	1195	51747	10180	9988	55015	9584	29994	54816	221037	1060	23469	989	23607	30836	55023	51427	4698	9321	7110	9147	51575	27332	9360	23253	3895	2803
651	Unknown_5_BMC.Med.Genomics.2011_PMID.21214954	Median Expression	PMID.21214954	6675	3068	7203	7371	3608	6944	5692	5202	55585	2224	6635	55827	25874	142	9804	92342	55204	2029	80232	140609	8674	51018	54953	51430	9926	159	23219	90806	9453	8443	55746	25936	55699	7257	64216	9857	6738	51742	64746	6726	57147	26750	11243	7818	10456	54499
652	Unknown_6_BMC.Med.Genomics.2011_PMID.21214954	Median Expression	PMID.21214954	28981	9987	55769	22889	10915	65981	5411	9295	55082	57018	4820	25957	23360	57396	1195	51747	10180	9988	55015	9584	29994	54816	221037	1060	23469	989	23607	30836	55023	51427	4698	9321	7110	9147	51575	27332	9360	23253	3895	2803	6741	10600	7095	54165	55660	65117
653	Unknown_7_BMC.Med.Genomics.2011_PMID.21214954	Median Expression	PMID.21214954	5877	25896	27042	25782	9015	6675	3068	7203	7371	3608	6944	5692	5202	55585	2224	6635	55827	25874	142	9804	92342	55204	2029	80232	140609	8674	51018	54953	51430	9926	159	23219	90806	9453	8443	55746	25936	55699	7257	64216	9857	6738	51742	64746	6726	57147
654	Unknown_8_BMC.Med.Genomics.2011_PMID.21214954	Median Expression	PMID.21214954	11252	23464	2547	25814	23760	27352	8508	25776	10126	8664	25793	54471	706	5372	6767	10291	25828	27349	23481	56478	4282	51493	4809	529	64976	7353	6634	29796	9978	4700	4733	1652	23786	25813	5435	158	8214	27440	7332	10478	9342	1312
655	Unknown_9_BMC.Med.Genomics.2011_PMID.21214954	Median Expression	PMID.21214954	55695	155400	9984	55556	10147	23309	23524	29896	7536	55184	7692	26152	51564	22863	8906	6601	5863	9256	4485	55592	11188	275	57658	37	10482	30827	80022	2550	8106	55657	11129	6625	29990	7919	54540	55716	55268	10181	7593	10307	9905	9924	80279	3425	55367	79661
656	Up_regulated_by_Oncogenic_N_RAS_Cell_Rep.2015_PMID.26166574	Median Expression	PMID.26166574	56944	27063	64648	151887	25849	723961	7103	653743	643338	64650	389336	1016	183	652683	245972	221395	646371	5055	55894	84676	3638	11067	1028	5454	26609	389136	25900	1673	10516	79633	57007	57639	28986	29949	114800	84206	7869	51480	283537	6706	57326	2781	7299	219539	312	389860
657	Up_regulated_upon_N_RAS_repression_Cell_Rep.2015_PMID.26166574	Median Expression	PMID.26166574	8839	72	5104	1281	10216	9022	3858	779	57007	56944	4761	283987	112609	11005	1264	1008	10417	7857	2829	2192	150967	3162	81553	647764	25984	6615	8988	1290	3868	5132	389336	51560	6876	55504	55731	90557	91409	2202	27063	7832	55351	9753	22808	376267	2167	151887
658	Vascular.Content_Clin.Exp.Metastasis.2014_PMID.23975155	Median Expression	PMID.23975155	8751	26289	8862	613	54796	132720	857	881	4267	11140	64781	10970	389722	1490	1543	1627	11080	1889	2202	51162	30846	2004	2048	90952	11082	283849	131583	54751	79147	10750	84717	64399	3204	3216	3217	8692	10643	84456	3910	3912	96626	4017	54682	115123	4162	1954
659	VEGF_13genes_BMC.Med.2009_PMID.19291283	Median Expression	PMID.19291283	58528	7345	2171	51083	5351	54541	7422	133	51129	10397	4860	9123	55640
660	Verhaak_Immune_Nat.Commun.2013_PMID.24113773	Median Expression	PMID.24113773	10320	9910	3575	55303	3106	3937	4046	2533	5341	3055	3587	10859	3071	3903	4688	1536	5788	7805	963	2124	6503	3689	4542	3059	4332	3561	962	313	6352	4050	9535	474344	3003	7940	8477	10288	7456	951	51411	2207	7305	10875	2313	3394	55843	10019
661	Verhaak_Stromal_Nat.Commun.2013_PMID.24113773	Median Expression	PMID.24113773	9452	4921	55340	3671	1634	5069	6424	7058	9450	9547	2294	1300	72	54518	4068	23213	4481	719	2191	5740	9358	633	6387	1842	2212	51338	8840	1278	64231	1909	7412	25960	57758	199	9843	4060	5733	862	1003	23533	10268	9079	1346	10085	2213	9890
662	Wahl_aMaSC_Signature_Cell.Stem.Cell.2012_PMID.22305568	Median Expression	PMID.22305568	87	134	358	360	366	408	576	639	684	768	822	885	924	953	968	978	1001	1003	1012	1241	1263	1308	1409	1417	1440	1545	1620	1672	1840	2047	2067	2081	2701	2707	2730	2769	2828	2859	2877	2939	3029	3162	3352	3373	3434	3437
663	Wahl_fMasC_Signature_Cell.Stem.Cell.2012_PMID.22305568	Median Expression	PMID.22305568	408250	266977	341640	222553	170692	29760	90627	200958	389941	63976	11226	131096	155066	163175	57712	85004	122060	148641	125931	337954	118813	143662	152404	27345	116173	81706	146562	114569	219621	129642	221178	2676	55930	200010	54674	80070	80983	6660	79370	25928	5795	26576	8537	7869	771	7368
664	Wahl_fSTR_Signature_Cell.Stem.Cell.2012_PMID.22305568	Median Expression	PMID.22305568	276717	386652	91860	171019	222235	27286	253738	206338	64641	151651	137872	11278	431707	83643	133396	127495	60676	167359	23692	203447	81035	53406	51200	131578	57526	89774	59272	166336	55901	8821	56732	781	3356	4982	221687	4327	7472	80205	5866	91181	23213	9935	1396	10486	79649	80705
665	Wirapati_Proliferation_Breast.Cancer.Res.2008_PMID.18662380	Median Expression	PMID.18662380	6790	11065	29127	9787	22974	699	9133	1058	9232	9833	1063	332	4751	2305	10112	9055	11004	1164	55355	7153	11130	4085	9319	9700	983	6241	55143	1062	4605	2146	891	7272	10615	3833	24137	3161	3838	55165	10403	9493	27338	1434	10024	64151	3832	5111
666	XBP1_Signature_Nature.2014_PMID.24670641	Median Expression	PMID.24670641	55096	26046	23522	284217	56340	3907	151987	400	558	901	1021	1649	1942	2005	2058	2908	3008	3688	4097	4189	5151	5163	6016	6018	6046	6478	6509	6533	6651	6738	7150	7494	7543	8496	8553	9134	9360	9522	9639	9891	10245	10521	10564	10572	10621	10645
667	XRT_inducedgenes_Oh_PMID.24527691	Median Expression	PMID.24527691	136	362	50649	23229	445	84886	54520	1286	221184	153090	56940	54438	3945	56922	4781	5152	5160	5321	10957	10891	5613	59342	6397	9481	51312	6662	10010	114990	7436	7475
668	YALE_PIK3CA_Pathway_Ann.Oncol.2017_PMID.28177460	Median Expression	PMID.28177460	1	58	107	207	208	246	293	324	335	336	354	356	383	572	597	598	604	695	818	820	842	860	867	898	929	930	933	948	959	960	971	1017	1019	1020	1021	1026	1051	1072	1123	1147	1277	1278	1375	1386	1387	1398
669	YALE_RHOA_pathway_Ann.Oncol.2017_PMID.28177460	Median Expression	PMID.28177460	29	387	393	395	396	613	998	1027	1671	1894	4036	4168	5058	5585	5879	6530	7204	7409	7410	8655	9152	9181	9639	9743	9940	10103	10160	10276	10395	10451	11214	23263	23365	23370	23779	25791	50619	50650	55119	57522	64411	84033	92170	115557	116985	84526
670	Melanoma.Scorr.Immune.Cell.2015.PMID.26091043	Special Model	PMID.26091043	12	113	135	153	199	203	215	218	222	225	239	240	242	272	284	311	313	330	355	356	382	395	397	399	419	427	430	490	526	527	535	567	571	586	608	638	639	640	643	695	710	712	713	714	718	719
671	CD103_Ratio_Cancer.Cell.2014_PMID.25446897	Special Model	PMID.25446897	3815	1236	55509	2322	140685	3394	151888	4610	283420	728	10894	8714	4360	6614	23166	713	712	140738	10461	714	338773	58475	348	8529	54209	51284
672	Chemo_Endocrine_Score_CC_.2.LumA_subtract.by_CC.2.Basal_Clin.Cancer.Res.2017_PMID.27903675	Special Model	PMID.27903675	9	332	573	596	644	891	898	990	991	1001	1063	1956	2064	2099	2264	2296	2886	3169	3852	3861	3872	4137	4193	4288	4320	4605	4609	5241	6241	6422	7298	8190	9156	9232	9833	10403	11004	11065	23594	25800	26227	26996	29089	51523	54443	55165
673	Differentiation.Score_Model_BCR.2010_PMID.20813035	Special Model	PMID.20813035	891	11065	332	10403	991	9232	6241	4288	7298	55165	83540
674	Euclidean_Distance_2_CLOW_Euclidean.Distance_BCR.2010_PMID.20813035	Special Model	PMID.20813035	6712	51599	7022	1969	79679	8611	51322	83459	10052	558	59346	54845	55055	57380	1973	4582	9697	112	8607	9955	10544	79160	649	2886	2791	29984	51293	1289	25984	3489	55635	23151	54908	928	57402	4276	57490	9993	3880	5159	3775	7718	80742	9887	11094	22822
675	GHI_RS_Model_NJEM.2004_PMID.15591335	Special Model	PMID.15591335	6790	4605	891	332	4288	2064	2886	2944	4320	1515	573	968	596	5241	57758	2099	2597	2990	60	7037	6908	6175
676	IMS_Score_Clin.Cancer.Res.2018_PMID.29921729	Special Model	PMID.29921729	11047	4277	5719	8625
677	LUMA_HER2E_LTS_JCI.2020_PMID.32573490	Special Model	PMID.32573490	2	9	10	14	15	16	18	20	21	22	23	25	26	27	30	31	34	35	36	37	38	41	43	47	48	51	52	53	54	55	58	59	60	72	81	86	87	89	90	91	92	93	95	97	98	101
678	LUMB_HER2E_LTS_JCI.2020_PMID.32573490	Special Model	PMID.32573490	2	9	10	14	15	16	18	20	21	22	23	25	26	27	30	31	34	35	36	37	38	41	43	47	48	51	52	53	54	55	58	59	60	72	81	86	87	89	90	91	92	93	95	97	98	101
679	LUMA_LUMB_LTS_JCI.2020_PMID.32573490	Special Model	PMID.32573490	2	9	10	14	15	16	18	20	21	22	23	25	26	27	30	31	34	35	36	37	38	41	43	47	48	51	52	53	54	55	58	59	60	72	81	86	87	89	90	91	92	93	95	97	98	101
680	LUMA_Basal_LTS_JCI.2020_PMID.32573490	Special Model	PMID.32573490	2	9	10	14	15	16	18	20	21	22	23	25	26	27	30	31	34	35	36	37	38	41	43	47	48	51	52	53	54	55	58	59	60	72	81	86	87	89	90	91	92	93	95	97	98	101
681	LUMB_Basal_LTS_JCI.2020_PMID.32573490	Special Model	PMID.32573490	2	9	10	14	15	16	18	20	21	22	23	25	26	27	30	31	34	35	36	37	38	41	43	47	48	51	52	53	54	55	58	59	60	72	81	86	87	89	90	91	92	93	95	97	98	101
682	HER2E_Basal_LTS_JCI.2020_PMID.32573490	Special Model	PMID.32573490	2	9	10	14	15	16	18	20	21	22	23	25	26	27	30	31	34	35	36	37	38	41	43	47	48	51	52	53	54	55	58	59	60	72	81	86	87	89	90	91	92	93	95	97	98	101
683	Melanoma.Scorr.Keratin.Cell.2015.PMID.26091043	Special Model	PMID.26091043	12	113	135	153	199	203	215	218	222	225	239	240	242	272	284	311	313	330	355	356	382	395	397	399	419	427	430	490	526	527	535	567	571	586	608	638	639	640	643	695	710	712	713	714	718	719
684	Melanoma.Scorr.MITF.low.Cell.2015.PMID.26091043	Special Model	PMID.26091043	12	113	135	153	199	203	215	218	222	225	239	240	242	272	284	311	313	330	355	356	382	395	397	399	419	427	430	490	526	527	535	567	571	586	608	638	639	640	643	695	710	712	713	714	718	719
685	MRE_Score_Breast.Cancer.Res.Treat_2015_PMID.26109344	Special Model	PMID.26109344	1415	5723	6713	7298	8309	4582
686	Pcorr_Adenocarcinoma_JMD.2013_PMID.23701907	Special Model	PMID.23701907	10057	90	221	84168	782	822	10951	1003	1031	1113	10519	7123	80777	1796	1825	2237	8928	2709	3231	3249	8692	3382	7087	3642	3655	3958	3991	26020	22924	10873	23295	4608	4647	4783	10606	5058	5175	5286	22874	10213	79966	2810	6478	9892	3925	6928
687	Pcorr_basal_CCR.2010_PMID.20643781	Special Model	PMID.20643781	23028	11013	6434	56997	4072	23020	752	3002	55603	2736	6280	4733	79838	51703	6318	79960	5791	330	30851	56548	8829	9616	8626	837	25780	4332	3298	2304	56649	89853	1969	3684	8508	5920	8975	7851	23048	1830	2709	64065	7056	50615	4199	2	6382	4319
688	Pcorr_Breast2Lung_LM2_Correlation_Nature.2005_PMID.16049480	Special Model	PMID.16049480	2012	466	387509	1440	218	7805	2069	4155	4313	169611	8573	6678	3669	51360	28231	5270	30014	1364	5154	1435	2919	5920	8743	7739	8942	834	182	7852	8226	23002	60489	6091	3598	4628	4837	4237	9882	1277	3115	10150	4312	3397	4848	4147	4121	84612
689	Pcorr_Breast2Lung_Parental_Correlation_Nature.2005_PMID.16049480	Special Model	PMID.16049480	2012	466	387509	1440	218	7805	2069	4155	4313	169611	8573	6678	3669	51360	28231	5270	30014	1364	5154	1435	2919	5920	8743	7739	8942	834	182	7852	8226	23002	60489	6091	3598	4628	4837	4237	9882	1277	3115	10150	4312	3397	4848	4147	4121	84612
690	Pcorr_bronchioid_PLOS.2012_PMID.22590557	Special Model	PMID.22590557	701	983	9787	92086	10135	29923	55355	55332	79170	51557	3128	54440	7257	128872	55197	54845	25849	3620	55638	26010	3783	722	6236	4818	55872	3002	6440	5901	83442	7412	341	8857	2277	79838	6624	2065	3015	11113	3336	6059	259266	54	9404	22797	911	3394
691	Pcorr_Carcinoid_JMD.2013_PMID.23701907	Special Model	PMID.23701907	10057	90	221	84168	782	822	10951	1003	1031	1113	10519	7123	80777	1796	1825	2237	8928	2709	3231	3249	8692	3382	7087	3642	3655	3958	3991	26020	22924	10873	23295	4608	4647	4783	10606	5058	5175	5286	22874	10213	79966	2810	6478	9892	3925	6928
692	Pcorr_classical_CCR.2010_PMID.20643781	Special Model	PMID.20643781	23028	11013	6434	56997	4072	23020	752	3002	55603	2736	6280	4733	79838	51703	6318	79960	5791	330	30851	56548	8829	9616	8626	837	25780	4332	3298	2304	56649	89853	1969	3684	8508	5920	8975	7851	23048	1830	2709	64065	7056	50615	4199	2	6382	4319
693	Pcorr_CSR_Activated_Correlation_PNAS.2005_PMID.15701700	Special Model	PMID.15701700	84836	8607	1854	5718	169611	10613	222865	9260	4035	5216	6876	4209	91351	26292	11010	22925	6611	8836	317649	2217	27258	50484	55631	10957	5329	79902	10213	70	55270	8555	5902	4060	27244	2224	28985	27113	9276	1497	728661	55701	4597	6182	28957	1028	131566	55651
694	Pcorr_Dasatinib_L_Correlation_Cancer.Res.2007_PMID.17332353	Special Model	PMID.17332353	5412	3601	27242	10403	2131	50804	30011	7227	5099	2152	5621	7791	5696	10927	388228	11221	1806	317649	10206	84527	81539	7378	56704	7035	55742	23406	857	60686	23007	11167	1969	51747	92482	9411	1201	56994	2150	27250	55970	55323	283987	771	7048	5880	9120	53827
695	Pcorr_Dasatinib_R_Correlation_Cancer.Res.2007_PMID.17332353	Special Model	PMID.17332353	5412	3601	27242	10403	2131	50804	30011	7227	5099	2152	5621	7791	5696	10927	388228	11221	1806	317649	10206	84527	81539	7378	56704	7035	55742	23406	857	60686	23007	11167	1969	51747	92482	9411	1201	56994	2150	27250	55970	55323	283987	771	7048	5880	9120	53827
696	Pcorr_Hypoxia_High_Correlation_PLoS.Med.2006_PMID.16417408	Special Model	PMID.16417408	23036	11067	10397	6513	9123	2116	5351	284439	10144	9976	667	114907	283131	1808	3948	10903	4940	112399	6781	8819	5169	4015	901	3486	56477	57561	6531	665	5209	857	6659	133	123	675	54487	54940	8846	5033	5054	54775	6038	5214	64344	219539	1962	2026
697	Pcorr_Hypoxia_Low_Correlation_PLoS.Med.2006_PMID.16417408	Special Model	PMID.16417408	23036	11067	10397	6513	9123	2116	5351	284439	10144	9976	667	114907	283131	1808	3948	10903	4940	112399	6781	8819	5169	4015	901	3486	56477	57561	6531	665	5209	857	6659	133	123	675	54487	54940	8846	5033	5054	54775	6038	5214	64344	219539	1962	2026
698	Pcorr_IGS_Correlation_NJEM.2007_PMID.17229949	Special Model	PMID.17229949	202	334	471	596	966	1052	1153	1213	1432	1457	1477	1788	2012	2066	2081	2113	2317	2597	3176	3337	3939	4057	4137	4256	4287	4291	4316	4850	5037	5062	5151	5230	5355	5686	5887	5977	6421	6451	6638	6729	6745	7071	7163	7430	7465	8027
699	Pcorr_magnoid_PLOS.2012_PMID.22590557	Special Model	PMID.22590557	701	983	9787	92086	10135	29923	55355	55332	79170	51557	3128	54440	7257	128872	55197	54845	25849	3620	55638	26010	3783	722	6236	4818	55872	3002	6440	5901	83442	7412	341	8857	2277	79838	6624	2065	3015	11113	3336	6059	259266	54	9404	22797	911	3394
700	Pcorr_NKI70_Good_Correlation_Nature.2002_PMID.11823860	Special Model	PMID.11823860	9134	4318	56942	4175	1284	92140	10403	10874	57758	160897	2131	81624	85453	57211	169714	151126	51514	8659	79132	5019	2781	51377	9055	57593	7043	91283	10455	163	8833	2947	55321	79791	79888	57110	5984	6515	1058	51560	8293	1894	8840	11217	51203	8476	58475	83879
701	Pcorr_primitive_CCR.2010_PMID.20643781	Special Model	PMID.20643781	23028	11013	6434	56997	4072	23020	752	3002	55603	2736	6280	4733	79838	51703	6318	79960	5791	330	30851	56548	8829	9616	8626	837	25780	4332	3298	2304	56649	89853	1969	3684	8508	5920	8975	7851	23048	1830	2709	64065	7056	50615	4199	2	6382	4319
702	Pcorr_secretory_CCR.2010_PMID.20643781	Special Model	PMID.20643781	23028	11013	6434	56997	4072	23020	752	3002	55603	2736	6280	4733	79838	51703	6318	79960	5791	330	30851	56548	8829	9616	8626	837	25780	4332	3298	2304	56649	89853	1969	3684	8508	5920	8975	7851	23048	1830	2709	64065	7056	50615	4199	2	6382	4319
703	Pcorr_Small_Cell_Carcinoma_JMD.2013_PMID.23701907	Special Model	PMID.23701907	10057	90	221	84168	782	822	10951	1003	1031	1113	10519	7123	80777	1796	1825	2237	8928	2709	3231	3249	8692	3382	7087	3642	3655	3958	3991	26020	22924	10873	23295	4608	4647	4783	10606	5058	5175	5286	22874	10213	79966	2810	6478	9892	3925	6928
704	Pcorr_squamoid_PLOS.2012_PMID.22590557	Special Model	PMID.22590557	701	983	9787	92086	10135	29923	55355	55332	79170	51557	3128	54440	7257	128872	55197	54845	25849	3620	55638	26010	3783	722	6236	4818	55872	3002	6440	5901	83442	7412	341	8857	2277	79838	6624	2065	3015	11113	3336	6059	259266	54	9404	22797	911	3394
705	Pcorr_Squamous_Cell_Carcinoma_JMD.2013_PMID.23701907	Special Model	PMID.23701907	10057	90	221	84168	782	822	10951	1003	1031	1113	10519	7123	80777	1796	1825	2237	8928	2709	3231	3249	8692	3382	7087	3642	3655	3958	3991	26020	22924	10873	23295	4608	4647	4783	10606	5058	5175	5286	22874	10213	79966	2810	6478	9892	3925	6928
706	Proliferation_11_Mean_JCO.2009_PMID.19204204	Special Model	PMID.19204204	9	332	573	596	644	891	898	990	991	1001	1063	1956	2064	2099	2264	2296	2886	3169	3852	3861	3872	4137	4193	4288	4320	4605	4609	5241	6241	6422	7298	8190	9156	9232	9833	10403	11004	11065	23594	25800	26227	26996	29089	51523	54443	55165
707	REPLICATION_STRESS_MODEL_Cell.Rep.2018_PMID.29768207	Special Model	PMID.29768207	1535	5918	3486	6275	10232	218	6278	4582	12	794	4256	57016	6947	6286	1545	100134265	8644	8714	629	1346	29803	1109	8942	441282	51523	1672	8000	114897	3205	970	5069	54749	114783	79153	290	25797	55603	2167	768	260293	1066	1646	65108	1675	387568	6364
708	ROR_S_Model_JCO.2009_PMID.19204204	Special Model	PMID.19204204	9	332	573	596	644	891	898	990	991	1001	1063	1956	2064	2099	2264	2296	2886	3169	3852	3861	3872	4137	4193	4288	4320	4605	4609	5241	6241	6422	7298	8190	9156	9232	9833	10403	11004	11065	23594	25800	26227	26996	29089	51523	54443	55165
709	RSS_Score_Clin.Cancer.Res.2018_PMID.29921729	Special Model	PMID.29921729	495	8292	4193	5187	3838	891	6307	10950	7280	960	4751	5334	1047	3398	9733	23062	1649	10628	55180	126208	26499	5321	54938	23531	27241	11116	63982	55270	1349	55766	5834	7874	5251	10827
710	Scorr_Basal_Correlation_JCO.2009_PMID.19204204	Special Model	PMID.19204204	9	332	573	596	644	891	898	990	991	1001	1063	1956	2064	2099	2264	2296	2886	3169	3852	3861	3872	4137	4193	4288	4320	4605	4609	5241	6241	6422	7298	8190	9156	9232	9833	10403	11004	11065	23594	25800	26227	26996	29089	51523	54443	55165
711	Scorr_EMAT1_Correlation_BCR.2020_PMID.32641077	Special Model	PMID.32641077	2	26154	3983	641371	84830	84803	9447	220	247	288	375248	339416	306	653145	10053	9582	8542	9938	23779	641522	419	9048	286554	624	633	638	274	684	11067	10974	55337	79098	717	719	760	768	57863	816	834	80212	6352	894	1230	999	1009	1000
712	Scorr_EMAT2_Correlation_BCR.2020_PMID.32641077	Special Model	PMID.32641077	2	26154	3983	641371	84830	84803	9447	220	247	288	375248	339416	306	653145	10053	9582	8542	9938	23779	641522	419	9048	286554	624	633	638	274	684	11067	10974	55337	79098	717	719	760	768	57863	816	834	80212	6352	894	1230	999	1009	1000
713	Scorr_EMAT3_Correlation_BCR.2020_PMID.32641077	Special Model	PMID.32641077	2	26154	3983	641371	84830	84803	9447	220	247	288	375248	339416	306	653145	10053	9582	8542	9938	23779	641522	419	9048	286554	624	633	638	274	684	11067	10974	55337	79098	717	719	760	768	57863	816	834	80212	6352	894	1230	999	1009	1000
714	Scorr_EMAT4_Correlation_BCR.2020_PMID.32641077	Special Model	PMID.32641077	2	26154	3983	641371	84830	84803	9447	220	247	288	375248	339416	306	653145	10053	9582	8542	9938	23779	641522	419	9048	286554	624	633	638	274	684	11067	10974	55337	79098	717	719	760	768	57863	816	834	80212	6352	894	1230	999	1009	1000
715	Scorr_Her2_Correlation_JCO.2009_PMID.19204204	Special Model	PMID.19204204	9	332	573	596	644	891	898	990	991	1001	1063	1956	2064	2099	2264	2296	2886	3169	3852	3861	3872	4137	4193	4288	4320	4605	4609	5241	6241	6422	7298	8190	9156	9232	9833	10403	11004	11065	23594	25800	26227	26996	29089	51523	54443	55165
716	Scorr_IE_Correlation_JCO.2006_PMID.16505416	Special Model	PMID.16505416	56994	960	84749	11190	3662	80173	5685	79733	200895	55765	1793	55308	4107	64377	27183	705	152	55344	55848	3249	81624	57763	24145	54920	9057	3134	3692	9547	3479	9631	5328	221294	55697	4145	81569	10204	151194	6019	7277	54205	22974	10370	3242	55173	4957	3009
717	Scorr_IIE_Correlation_JCO.2006_PMID.16505416	Special Model	PMID.16505416	56994	960	84749	11190	3662	80173	5685	79733	200895	55765	1793	55308	4107	64377	27183	705	152	55344	55848	3249	81624	57763	24145	54920	9057	3134	3692	9547	3479	9631	5328	221294	55697	4145	81569	10204	151194	6019	7277	54205	22974	10370	3242	55173	4957	3009
718	Scorr_LumA_Correlation_JCO.2009_PMID.19204204	Special Model	PMID.19204204	9	332	573	596	644	891	898	990	991	1001	1063	1956	2064	2099	2264	2296	2886	3169	3852	3861	3872	4137	4193	4288	4320	4605	4609	5241	6241	6422	7298	8190	9156	9232	9833	10403	11004	11065	23594	25800	26227	26996	29089	51523	54443	55165
719	Scorr_LumB_Correlation_JCO.2009_PMID.19204204	Special Model	PMID.19204204	9	332	573	596	644	891	898	990	991	1001	1063	1956	2064	2099	2264	2296	2886	3169	3852	3861	3872	4137	4193	4288	4320	4605	4609	5241	6241	6422	7298	8190	9156	9232	9833	10403	11004	11065	23594	25800	26227	26996	29089	51523	54443	55165
720	Scorr_Norm_Correlation_JCO.2009_PMID.19204204	Special Model	PMID.19204204	9	332	573	596	644	891	898	990	991	1001	1063	1956	2064	2099	2264	2296	2886	3169	3852	3861	3872	4137	4193	4288	4320	4605	4609	5241	6241	6422	7298	8190	9156	9232	9833	10403	11004	11065	23594	25800	26227	26996	29089	51523	54443	55165
721	Scorr_P53_Mut_Correlation_BMC.Cancer.2006_PMID.17150101	Special Model	PMID.17150101	595	890	983	994	995	1026	1033	1063	1163	1643	2305	2625	3833	4085	4172	4288	4521	4605	4756	5424	5550	5984	6416	6790	6890	7153	7277	7832	7844	8836	9232	9319	9338	9493	9520	9674	11065	23048	25800	29028	29781	51313	54069	55165	55536	56204
722	Scorr_P53_Wt_Correlation_BMC.Cancer.2006_PMID.17150101	Special Model	PMID.17150101	595	890	983	994	995	1026	1033	1063	1163	1643	2305	2625	3833	4085	4172	4288	4521	4605	4756	5424	5550	5984	6416	6790	6890	7153	7277	7832	7844	8836	9232	9319	9338	9493	9520	9674	11065	23048	25800	29028	29781	51313	54069	55165	55536	56204
723	Scorr_PTEN_Absent_Correlation_PNAS.2007_PMID.17452630	Special Model	PMID.17452630	3983	5169	8510	2281	11337	1265	89122	55101	8576	4094	54838	10399	56977	25794	6228	5728	145781	27122	83700	5159	80031	26123	11257	140459	7284	1186	8848	10540	1848	10206	5797	2331	1311	221981	374868	84942	23613	1889	4629	5094	4038	6302	50861	400924	3705	9252
724	Scorr_PTEN_Present_Correlation_PNAS.2007_PMID.17452630	Special Model	PMID.17452630	3983	5169	8510	2281	11337	1265	89122	55101	8576	4094	54838	10399	56977	25794	6228	5728	145781	27122	83700	5159	80031	26123	11257	140459	7284	1186	8848	10540	1848	10206	5797	2331	1311	221981	374868	84942	23613	1889	4629	5094	4038	6302	50861	400924	3705	9252
725	Scorr_S329_L_Correlation_Br.J.Cancer.2008_PMID.18382427	Special Model	PMID.18382427	57508	90326	55857	200523	146434	57405	644267	26548	58487	9493	6636	6635	116211	9258	257000	89882	8365	65125	9456	7572	79861	64710	3557	9662	7471	2617	23020	51258	3035	8727	55810	1421	4259	4835	7832	10038	55089	7156	84229	54733	9129	79774	318	10151	51129	6773
726	Scorr_S329_R_Correlation_Br.J.Cancer.2008_PMID.18382427	Special Model	PMID.18382427	57508	90326	55857	200523	146434	57405	644267	26548	58487	9493	6636	6635	116211	9258	257000	89882	8365	65125	9456	7572	79861	64710	3557	9662	7471	2617	23020	51258	3035	8727	55810	1421	4259	4835	7832	10038	55089	7156	84229	54733	9129	79774	318	10151	51129	6773
727	GP2_Immune_Metagene	Special Model	Current Manuscript / next sheet
728	IMMUNE_Bindea_Cell_Blood_vessels_Immunity.2013_PMID.24138885	Single_Gene	PMID.24138885	1003
729	IMMUNE_Bindea_Cell_pDC_Immunity.2013_PMID.24138885	Single_Gene	PMID.24138885	3563
730	IMMUNE_Bindea_Cell_TReg_Immunity.2013_PMID.24138885	Single_Gene	PMID.24138885	50943
731	CDKN2A_Single_Gene	Single_Gene	N/A	1029
732	CTLA4_Single_Gene	Single_Gene	N/A	1493
733	EGFR_Single_Gene	Single_Gene	N/A	1956
734	ERBB2_Single_Gene	Single_Gene	N/A	2064
735	ERBB3_Single_Gene	Single_Gene	N/A	2065
736	ESR1_Single_Gene	Single_Gene	N/A	2099
737	FGFR4_Single_Gene	Single_Gene	N/A	2264
738	HRAS_Single_Gene	Single_Gene	N/A	3265
739	KRAS_Single_Gene	Single_Gene	N/A	3845
740	MYC_Single_Gene	Single_Gene	N/A	4609
741	NRAS_Single_Gene	Single_Gene	N/A	4893
742	PDCD1_Single_Gene	Single_Gene	N/A	5133
743	PDGFRA_Single_Gene	Single_Gene	N/A	5156
744	PDGFRB_Single_Gene	Single_Gene	N/A	5159
745	PGR_Single_Gene	Single_Gene	N/A	5241
746	PTEN_Single_Gene	Single_Gene	N/A	5728
747	RB1_Single_Gene	Single_Gene	N/A	5925
[truncated: 5,000 more columns]

## Sheet: GP2_Immune_Metagene
GP2_Immune_Tcell_Bcell_Macrophages_Dendritic_cells signature
CIBERSORT_Dendritic_cells_activated_Nat.Methods.2015_PMID.25822800
CIBERSORT_Dendritic_cells_resting_Nat.Methods.2015_PMID.25822800
CIBERSORT_Macrophages_M1_Nat.Methods.2015_PMID.25822800
CIBERSORT_Macrophages_M2_Nat.Methods.2015_PMID.25822800
CIBERSORT_Monocytes_Nat.Methods.2015_PMID.25822800
GSEA_GP2_Immune_Tcell_Bcell.r.0.949_PerouLab_Immune_cell_Cluster_BMC_Med_Genomics_2011_PMID.21214954
GSEA_GP2_Immune_Tcell_Bcell.r.0.964_KEGG_HEMATOPOIETIC_CELL_LINEAGE
HCK_Breast.Cancer.Research.2008_PMID.19272155
Immune_Suppression_Kardos_JCI.Insight.2016_PMID.27699256
MacTh1_cluster_Iglesia_CCR.2014_PMID.24916698
MERCK_Immune_signature_Science.2018_PMID.30309915
T_RM_Cell_single_cell_signature_Savas_Nat_Med.2018_PMID.29942092
Tcell_EXH_Memory_CD8_T_cell_a_vs_Naive_CD8_T_cell_Metagene_1_Science.2016_PMID.27789795
TCGA.BRCA.1198_immune_CD4_CD53_CD84_BTK_JCI.2020_PMID.32573490
Verhaak_Immune_Nat.Commun.2013_PMID.24113773
TCGA_CSF1_response_Immunity.2018_PMID._29628290

## Sheet: HALLMARK_INTERFERON_GAMMA_RESPO
HALLMARK_INTERFERON_GAMMA_RESPONSE
> Genes up-regulated in response to IFNG [GeneID=3458].https://www.gsea-msigdb.org/gsea/msigdb/cards/HALLMARK_INTERFERON_GAMMA_RESPONSE.html
103|ADAR
80830|APOL6
84159|ARID5B
10124|ARL4A
26053|AUTS2
567|B2M
55024|BANK1
116071|BATF2
669|BPGM
684|BST2
694|BTG1
715|C1R
716|C1S
834|CASP1
836|CASP3
837|CASP4
840|CASP7
841|CASP8
6347|CCL2
6352|CCL5
6354|CCL7
29126|CD274
952|CD38
958|CD40
969|CD69
972|CD74
942|CD86
1026|CDKN1A
629|CFB
3075|CFH
4261|CIITA
1240|CMKLR1
129607|CMPK2
23070|CMTR1
1439|CSF2RB
3627|CXCL10
6373|CXCL11
4283|CXCL9
23586|DDX58
55601|DDX60
79132|DHX58
5610|EIF2AK2
317649|EIF4E3
94240|EPSTI1
355|FAS
2209|FCGR1A
10875|FGL2
2357|FPR1
115361|GBP4
163351|GBP6
2643|GCH1
2841|GPR18
3001|GZMA
85441|HELZ2
55008|HERC6
3091|HIF1A
3105|HLA-A
3106|HLA-B
3108|HLA-DMA
3117|HLA-DQA1
3123|HLA-DRB1
3135|HLA-G
3383|ICAM1
3620|IDO1
3429|IFI27
10437|IFI30
3430|IFI35
10561|IFI44
10964|IFI44L
64135|IFIH1
3434|IFIT1
3433|IFIT2
3437|IFIT3
10581|IFITM2
10410|IFITM3
3455|IFNAR2
3587|IL10RA
3600|IL15
3601|IL15RA
10068|IL18BP
3560|IL2RB
3566|IL4R
3569|IL6
3574|IL7
3659|IRF1
3660|IRF2
3662|IRF4
3663|IRF5
3665|IRF7
3394|IRF8
10379|IRF9
9636|ISG15
3669|ISG20
51015|ISOC1
3695|ITGB7
3717|JAK2
22914|KLRK1
51056|LAP3
26524|LATS2
3937|LCP2
3959|LGALS3BP
4061|LY6E
256586|LYSMD2
55016|MARCHF1
196410|METTL7B
4502|MT2A
10797|MTHFD2
9961|MVP
4599|MX1
4600|MX2
4615|MYD88
10135|NAMPT
8202|NCOA3
4790|NFKB1
4792|NFKBIA
84166|NLRC5
9111|NMI
10392|NOD1
9688|NUP93
4939|OAS2
4940|OAS3
8638|OASL
11054|OGFR
9934|P2RY14
64761|PARP12
54625|PARP14
5142|PDE4B
57162|PELI1
5214|PFKP
5292|PIM1
5321|PLA2G4A
5359|PLSCR1
5371|PML
4860|PNP
87178|PNPT1
5683|PSMA2
5684|PSMA3
5699|PSMB10
5690|PSMB2
5696|PSMB8
5698|PSMB9
5720|PSME1
5721|PSME2
5743|PTGS2
5770|PTPN1
5771|PTPN2
5777|PTPN6
51735|RAPGEF6
10616|RBCK1
8737|RIPK1
8767|RIPK2
57674|RNF213
55072|RNF31
91543|RSAD2
64108|RTP4
219285|SAMD9L
25939|SAMHD1
6398|SECTM1
6403|SELP
710|SERPING1
57823|SLAMF7
81894|SLC25A28
8651|SOCS1
9021|SOCS3
6648|SOD2
3431|SP110
84888|SPPL2A
6717|SRI
8082|SSPN
8869|ST3GAL5
7903|ST8SIA4
6772|STAT1
6773|STAT2
6774|STAT3
6775|STAT4
6890|TAP1
6892|TAPBP
23424|TDRD7
7127|TNFAIP2
7128|TNFAIP3
7130|TNFAIP6
8743|TNFSF10
27348|TOR1B
10906|TRAFD1
9830|TRIM14
6737|TRIM21
7706|TRIM25
7726|TRIM26
10628|TXNIP
9246|UBE2L6
7378|UPP1
11274|USP18
10791|VAMP5
8673|VAMP8
7412|VCAM1
7453|WARS1
54739|XAF1
6375|XCL1
81030|ZBP1
57169|ZNFX1

## Sheet: Normal tissue signature
Normal tissue signature (Brain_Liver_Lung-normal tissues)
547|KIF1A
1995|ELAVL3
642968|FAM163B
219287|AMER2
2566|GABRG2
4336|MOBP
NA|LINC00599
3785|KCNQ2
9118|INA
1463|NCAN
4747|NEFL
492|ATP2B3
23040|MYT1L
3761|KCNJ4
29114|TAGLN3
1496|CTNNA2
6860|SYT4
93377|OPALIN
2558|GABRA5
NA|HMP19
55530|SVOP
23025|UNC13A
478|ATP1A3
116448|OLIG1
51440|HPCAL4
22895|RPH3A
54715|RBFOX1
205147|AMER3
10215|OLIG2
9568|GABBR2
10382|TUBB4A
23109|DDN
79012|CAMKV
85300|ATCAY
132204|SYNPR
140767|NRSN1
2290|FOXG1
4741|NEFM
285175|UNC80
5798|PTPRN
56896|DPYSL5
2572|GAD2
84530|SRRM4
283576|ZDHHC22
2596|GAP43
344838|PAQR9
NA|GPR123
222008|VSTM2A
885|CCK
10804|GJB6
118427|OLFM3
4340|MOG
10716|TBR1
51412|ACTL6B
26038|CHD5
5126|PCSK2
50632|CALY
10368|CACNG3
2556|GABRA3
27012|KCNV1
6657|SOX2
25769|SLC24A2
29993|PACSIN1
6616|SNAP25
6457|SH3GL3
347730|LRRTM1
389197|C4orf50
2913|GRM3
56934|CA10
5454|POU3F2
6440|SFTPC
645323|LINC00461
83482|SCRT1
54212|SNTG1
256472|TMEM151A
27164|SALL3
29906|ST8SIA5
114798|SLITRK1
NA|LINC01105
610|HCN2
283999|TMEM235
3798|KIF5A
200407|CREG2
81551|STMN4
114794|ELFN2
57642|COL20A1
4978|OPCML
50614|GALNT9
57471|ERMN
3760|KCNJ3
85445|CNTNAP4
774|CACNA1B
729956|SHISA7
1114|CHGB
3763|KCNJ6
NA|TMEM155
654429|LRTM2
9515|STXBP5L
777|CACNA1E
51286|CEND1
388021|TMEM179
57282|SLC4A10
84504|NKX6-2
114788|CSMD3
23017|FAIM2
359822|KCNIP4-IT1
23620|NTSR2
2902|GRIN1
441151|TMEM151B
5992|RFX4
NA|FAM153C
4884|NPTX1
11255|HRH3
10900|RUNDC3A
11189|CELF3
730130|TMEM229A
22983|MAST1
2565|GABRG1
3208|HPCA
146713|RBFOX3
333|APLP1
1113|CHGA
6900|CNTN2
1008|CDH10
646113|LINC00643
147381|CBLN2
56884|FSTL5
138046|RALYL
9892|SNAP91
347731|LRRTM3
6543|SLC8A2
255928|SYT14
29106|SCG3
3765|KCNJ9
1007|CDH9
8618|CADPS
57575|PCDH10
NA|FAM57B
9745|ZNF536
4661|MYT1
83851|SYT16
NA|GPR123-AS1
57497|LRFN2
60484|HAPLN2
375612|LHFPL3
51555|PEX5L
63827|BCAN
128414|NKAIN4
2785|GNG3
5522|PPP2R2C
57582|KCNT1
23544|SEZ6L
7425|VGF
57338|JPH3
114571|SLC22A9
6534|SLC6A7
9211|LGI1
388662|SLC6A17
51305|KCNK9
6000|RGS7
6861|SYT5
343702|XKR7
9143|SYNGR3
347689|SOX2-OT
170302|ARX
59283|CACNG8
9758|FRMPD4
375704|ENHO
161357|MDGA2
23359|FAM189A1
10675|CSPG5
51059|FAM135B
114795|TMEM132B
9362|CPNE6
2823|GPM6A
285194|TUSC7
284998|LINC01114
NA|LPPR5
58512|DLGAP3
23217|ZFR2
8927|BSN
8193|DPF1
400745|SH2D5
27344|PCSK1N
146664|MGAT5B
11075|STMN2
5354|PLP1
3746|KCNC1
2560|GABRB1
9283|GPR37L1
100421058|PABPC1P11
1996|ELAVL4
4761|NEUROD2
399947|C11orf87
9699|RIMS2
54769|DIRAS2
196500|PIANP
6855|SYP
84502|JPH4
27087|B3GAT1
221074|SLC39A12
NA|DGCR9
284339|TMEM145
100133234|SBF1P1
594855|CPLX3
25830|SULT4A1
56853|CELF4
131034|CPNE4
3780|KCNN1
887|CCKBR
222662|LHFPL5
1607|DGKB
6753|SSTR3
NA|PPAPDC1A
375323|LHFPL4
3706|ITPKA
57512|GPR158
84258|SYT3
482|ATP1B2
285441|F11-AS1
2571|GAD1
56479|KCNQ5
398|ARHGDIG
26059|ERC2
79957|PAQR6
7781|SLC30A3
90113|VWA5B2
400765|MIR137HG
2911|GRM1
64714|PDIA2
NA|UG0898H09
NA|PRKRIRP2
NA|ERICH1-AS1
4155|MBP
NA|C8orf46
148014|TTC9B
NA|FAM19A1
1005|CDH7
100127950|HECW1-IT1
26033|ATRNL1
8224|SYN3
6870|TACR3
534|ATP6V1G2
84867|PTPN5
79953|SYNDIG1
92737|DNER
10297|APC2
6857|SYT1
139728|PNCK
285780|LY86-AS1
65009|NDRG4
101927554|LINC01250
416|ARSF
1826|DSCAM
57528|KCTD16
57030|SLC17A7
2891|GRIA2
388394|RPRML
5662|PSD
9478|CABP1
5596|MAPK4
6585|SLIT1
23072|HECW1
84699|CREB3L3
29944|PNMA3
389023|DPP10-AS1
57578|UNC79
816|CAMK2B
9378|NRXN1
83698|CALN1
NA|FAM19A4
100506724|LINC00901
23305|ACSL6
79605|PGBD5
51761|ATP8A2
56475|RPRM
145624|PWAR1
5121|PCP4
9148|NEURL1
1795|DOCK3
5864|RAB3A
NA|KIAA1644
153469|JAKMIP2-AS1
386617|KCTD8
445577|C9orf129
8715|NOL4
57554|LRRC7
375567|VWC2
283455|KSR2
1917|EEF1A2
1501|CTNND2
57172|CAMK1G
84631|SLITRK2
5081|PAX7
5801|PTPRR
94030|LRRC4B
56154|TEX15
NA|LINC01314
57408|LRTM1
100507588|TGFBR3L
114786|XKR4
158038|LINGO2
256714|MAP7D2
8851|CDK5R1
255275|MYADML2
10740|RFPL1S
4133|MAP2
100507533|SOX21-AS1
9024|BRSK2
3800|KIF5C
57524|CASKIN1
222537|HS3ST5
9228|DLGAP2
90249|UNC5A
10715|CERS1
53822|FXYD7
773|CACNA1A
NA|NLRP9P
404216|LINC01561
40|ASIC2
57795|BRINP2
3737|KCNA2
7447|VSNL1
23105|FSTL4
84249|PSD2
146330|FBXL16
9829|DNAJC6
2044|EPHA5
8911|CACNA1I
101515984|LINC01080
124925|SEZ6
11023|VAX1
84944|MAEL
5521|PPP2R2B
NA|BAI3
NA|KIAA1045
10718|NRG3
81832|NETO1
168090|C6orf118
2914|GRM4
2016|EMX1
22999|RIMS1
4986|OPRK1
55515|ASIC4
64137|ABCG4
23281|MTUS2
23418|CRB1
9783|RIMS3
2567|GABRG3
100874090|SLC6A1-AS1
23101|MCF2L2
NA|GOLGA6L7P
140730|RIMS4
116986|AGAP2
53358|SHC3
3754|KCNF1
9915|ARNT2
711|ERC2-IT1
9369|NRXN3
100874237|CACNA2D3-AS1
6334|SCN8A
1812|DRD1
23416|KCNH3
254263|CNIH2
84457|PHYHIPL
342850|ANKRD62
154790|CLEC2L
23504|RIMBP2
84623|KIRREL3
10687|PNMA2
101929590|NRG3-AS1
100132541|GXYLT1P3
2904|GRIN2B
144453|BEST3
2562|GABRB3
4185|ADAM11
11076|TPPP
84894|LINGO1
56776|FMN2
57595|PDZD4
NA|EFTUD1P1
116173|CMTM5
284427|SLC25A41
114787|GPRIN1
22987|SV2C
57718|PPP4R4
119|ADD2
9717|SEC14L5
9840|TESPA1
9900|SV2A
NA|PTCHD2
101928469|MIR325HG
NA|BAI1
103695433|LINC01322
644050|LINC01529
2834|PRLHR
2898|GRIK2
257240|KLHL34
85397|RGS8
11170|FAM107A
114|ADCY8
121601|ANO4
477|ATP1A2
51308|REEP2
266722|HS6ST3
222553|SLC35F1
7681|MKRN3
9229|DLGAP1
2046|EPHA8
22891|ZNF365
3360|HTR4
152404|IGSF11
78997|GDAP1L1
58473|PLEKHB1
22979|EFR3B
100887067|KRT8P48
253982|ASPHD1
220296|HEPACAM
23413|NCS1
9715|FAM131B
283738|NTRK3-AS1
8499|PPFIA2
100131810|ADH5P3
NA|WBSCR17
85455|DISP2
60680|CELF5
9899|SV2B
779|CACNA1S
27006|FGF22
4684|NCAM1
124842|TMEM132E
NA|BAI2
55966|AJAP1
55879|GABRQ
3756|KCNH1
1131|CHRM3
321|APBA2
387104|SOGA3
283592|FAM181A-AS1
9796|PHYHIP
NA|C15orf59
NA|FAM19A5
92211|CDHR1
1740|DLG2
729522|AACSP1
253970|SFTA3
2583|B4GALNT1
1310|COL19A1
100861507|FTCD-AS1
80725|SRCIN1
63876|PKNOX2
7087|ICAM5
55799|CACNA2D3
8822|FGF17
23467|NPTXR
84446|BRSK1
3897|L1CAM
NA|CXorf22
NA|LINC00846
6327|SCN2B
3786|KCNQ3
104502417|MGAT3-AS1
NA|FAM69C
1132|CHRM4
51560|RAB6B
100507524|ARHGEF26-AS1
162494|RHBDL3
122060|SLAIN1
123041|SLC24A4
8448|DOC2A
57453|DSCAML1
283480|FGF14-IT1
4685|NCAM2
57476|GRAMD1B
5799|PTPRN2
54413|NLGN3
100329135|TRPC5OS
150726|FBXO41
192683|SCAMP5
284434|NWD1
9468|PCYT1B
54777|CFAP46
9379|NRXN2
164633|CABP7
57731|SPTBN4
400619|LINC00511
27239|GPR162
83648|FAM167A
1951|CELSR3
56147|PCDHA1
2912|GRM2
108|ADCY2
440073|IQSEC3
230|ALDOC
NA|LL22NC03-104C7
2842|GPR19
138649|ANKRD19P
101929407|PTPRD-AS1
134111|UBE2QL1
3352|HTR1D
23671|TMEFF2
23154|NCDN
134548|SOWAHA
9751|SNPH
7093|TLL2
348487|FAM131C
50649|ARHGEF4
23314|SATB2
9764|KIAA0513
112476|PRRT2
57699|CPNE5
4130|MAP1A
3196|TLX2
644998|KRT8P19
283089|WDR11-AS1
53353|LRP1B
6710|SPTB
84968|PNMA6A
167359|NIM1K
84440|RAB11FIP4
7732|RNF112
10815|CPLX1
2901|GRIK5
6804|STX1A
84443|FRMPD3
728215|FAM155A
116931|MED12L
2134|EXTL1
8514|KCNAB2
284615|ANKRD34A
8745|ADAM23
84871|AGBL4
440730|TRIM67
6252|RTN1
56097|PCDHGC5
9472|AKAP6
100130148|MAPT-IT1
343263|MYBPHL
79929|MAP6D1
1630|DCC
340508|GAS2L1P2
220382|FAM181B
10439|OLFM1
1002|CDH4
114783|LMTK3
84978|FRMD5
10361|NPM2
1837|DTNA
349152|DPY19L2P2
285613|RELL2
440435|GPR179
4137|MAPT
100133036|FAM95B1
NA|CCDC108
8120|AP3B2
392309|OR13J1
56660|KCNK12
8541|PPFIA3
57863|CADM3
100312803|VN1R110P
84900|RNFT2
26051|PPP1R16B
100505576|LINC00672
NA|RLTPR
770|CA11
27156|RSPH14
1961|EGR4
157753|TMEM74
646278|PDCD6IPP2
79966|SCD5
283483|LINC00551
83394|PITPNM3
653247|PRB2
222166|MTURN
134121|C5orf49
79739|TTLL7
116442|RAB39B
126129|CPT1C
NA|PNMAL2
1301|COL11A1
23149|FCHO1
9028|RHBDL1
2051|EPHB6
1183|CLCN4
3797|KIF3C
9671|WSCD2
9479|MAPK8IP1
84722|PSRC1
727800|RNF208
161725|OTUD7A
282973|JAKMIP3
50863|NTM
148252|DIRAS1
NA|CCDC64
11033|ADAP1
2786|GNG4
66004|LYNX1
401647|GOLGA7B
114088|TRIM9
25876|SPEF1
29942|PURG
9718|ECE2
80164|PRR36
252995|FNDC5
6812|STXBP1
NA|AC141928
728116|ZBTB8B
4135|MAP6
20|ABCA2
115948|CCDC151
85315|PAQR8
23127|COLGALT2
79955|PDZD7
10858|CYP46A1
1742|DLG4
80128|TRIM46
155066|ATP6V0E2
91149|RAPGEF4-AS1
NA|CCDC37
139599|MAGEE2
NA|ANKRD20A3
9172|MYOM2
8506|CNTNAP1
81618|ITM2C
NA|CECR6
5949|RBP3
9762|LZTS3
101926996|RUNDC3A-AS1
2039|DMTN
56899|ANKS1B
197187|SNAI3-AS1
284525|SLC9C2
26470|SEZ6L2
284800|FAM182A
347733|TUBB2B
9145|SYNGR1
23148|NACAD
79041|TMEM38A
254050|LRRC43
4248|MGAT3
2550|GABBR1
41|ASIC1
166348|KBTBD12
85446|ZFHX2
NA|RNF144A-AS1
43|ACHE
26507|CNNM1
9863|MAGI2
NA|PNMAL1
166614|DCLK2
5080|PAX6
57118|CAMK1D
11250|GPR45
26290|GALNT8
341568|OR8S1
8140|SLC7A5
89801|PPP1R3F
7804|LRP8
4294|MAP3K10
25837|RAB26
79085|SLC25A23
4916|NTRK3
84254|CAMKK1
9901|SRGAP3
25999|CLIP3
51195|RAPGEFL1
11332|ACOT7
140290|TCP10L
57537|SORCS2
728194|RSPH10B2
22997|IGSF9B
8153|RND2
7461|CLIP2
4987|OPRL1
6752|SSTR2
339416|ANKRD45
84620|ST6GAL2
1759|DNM1
55553|SOX6
10391|CORO2B
2906|GRIN2D
285382|C3orf70
101927455|TMEM108-AS1
23108|RAP1GAP2
100302640|LINC00882
53342|IL17D
53630|BCO1
100507490|ZNF859P
23762|OSBP2
23114|NFASC
320|APBA1
782|CACNB1
23096|IQSEC2
64753|CCDC136
55083|KIF26B
84501|SPIRE2
55512|SMPD3
56098|PCDHGC4
129049|SGSM1
818|CAMK2G
NA|LINC00950
2781|GNAZ
104472715|SNHG14
199731|CADM4
8512|MBL1P
100885778|NALCN-AS1
339453|TMEM240
642797|DNAH10OS
NA|GATS
3423|IDS
NA|GATSL2
322|APBB1
50855|PARD6A
26012|NSMF
57168|ASPHD2
374875|HSD11B1L
30818|KCNIP3
57692|MAGEE1
9104|RGN
23162|MAPK8IP3
84660|CCDC62
54328|GPR173
4355|MPP2
NA|CCBL1
NA|LINC00693
285368|PRRT3
9649|RALGPS1
8997|KALRN
114814|GNRHR2
221002|RASGEF1A
2036|EPB41L1
23245|ASTN2
6844|VAMP2
203259|FAM219A
780776|TVP23A
23095|KIF1B
NA|SGK494
8831|SYNGAP1
158135|TTLL11
221061|FAM171A1
399671|HEATR4
5297|PI4KA
29|ABR
387923|SERP2
399473|SPRED3
23263|MCF2L
92521|SPECC1
6721|SREBF2
2894|GRID1
9922|IQSEC1
100286844|BCDIN3D-AS1
56114|PCDHGA1
29965|CDIP1
9825|SPATA2
23125|CAMTA2
80331|DNAJC5
83694|RPS6KL1
8567|MADD
90673|PPP1R3E
11165|NUDT3
55884|WSB2
283450|HECTD4
140735|DYNLL2
56995|TULP4
54805|CNNM2
147686|ZNF418
55275|VPS53
599|BCL2L2
NA|KIAA0226
9139|CBFA2T2
6439|SFTPB
653509|SFTPA1
1510|CTSE
256076|COL6A5
5225|PGC
6943|TCF21
8796|SCEL
83661|MS4A8
9496|TBX4
3170|FOXA2
144809|FAM216B
219995|MS4A15
64446|DNAI2
6441|SFTPD
6283|S100A12
140828|LINC00261
80086|TUBA4B
146429|SLC22A31
NA|FAM92B
11148|HHLA2
132203|SNTN
164312|LRRN4
250|ALPP
133690|CAPSL
26628|OR7E47P
177|AGER
140628|GATA5
157310|PEBP4
164781|DAW1
10232|MSLN
400406|ADAMTS7P3
1556|CYP2B7P
9476|NAPSA
NA|DPCR1
4680|CEACAM6
80329|ULBP1
3577|CXCR1
732|C8B
51208|CLDN18
8328|GFI1B
5196|PF4
207107|SFTA1P
100507308|TARID
348249|CCL15-CCL14
3310|HSPA6
5009|OTC
55289|ACOXL
6532|SLC6A4
284904|SEC14L4
4593|MUSK
11082|ESM1
2815|GP9
NA|LINC00694
195814|SDR16C5
5319|PLA2G1B
55273|TMEM100
2352|FOLR3
89872|AQP10
6442|SGCA
90527|DUOXA1
128209|KLF17
53905|DUOX1
3805|KIR2DL4
79908|BTNL8
115350|FCRL1
219790|RTKN2
3386|ICAM4
11185|INMT
57864|SLC46A2
50615|IL21R
255738|PCSK9
28231|SLCO4A1
6274|S100A3
2623|GATA1
404266|HOXB-AS3
80328|ULBP2
79625|NDNF
89780|WNT3A
343637|RSPO4
402415|XKRX
352962|HLA-V
NA|CH17-360D5
81027|TUBB1
146722|CD300LF
7103|TSPAN8
3337|DNAJB1
NA|HIST1H1PS1
51316|PLAC8
56000|NXF3
146862|UNC45B
4253|MIA2
6578|SLCO2A1
8516|ITGA8
253264|ZNF503-AS1
3811|KIR3DL1
53405|CLIC5
28984|RGCC
4069|LYZ
729828|ST13P20
727699|LINC00163
389434|IYD
259197|NCR3
100421724|BNIP3P5
3581|IL9R
80323|CCDC68
9437|NCR1
10203|CALCRL
259283|MDS2
941|CD80
646024|RAET1K
10753|CAPN9
NA|C8orf4
100129995|LINC01460
29126|CD274
100873979|RBMS3-AS3
100874019|KLHL6-AS1
342618|SLFN14
3575|IL7R
57716|PRX
181|AGRP
6332|SCN7A
55282|LRRC36
2|A2M
3127|HLA-DRB5
5251|PHEX
81693|AMN
101927167|GATA2-AS1
64116|SLC39A8
100128893|GATA6-AS1
8698|S1PR4
255743|NPNT
374378|GALNT18
1305|COL13A1
23554|TSPAN12
7432|VIP
648947|AKR1C7P
6236|RRAD
3215|HOXB5
5551|PRF1
79674|VEPH1
9241|NOG
57091|CASS4
5023|P2RX1
93010|B3GNT7
9022|CLIC3
2295|FOXF2
120892|LRRK2
83595|SOX7
387751|GVINP1
50506|DUOX2
6693|SPN
3738|KCNA3
89857|KLHL6
1285|COL4A3
10257|ABCC4
2570|GABRR2
7010|TEK
51348|KLRF1
51393|TRPV2
10344|CCL26
NA|GPR116
100873263|MTND5P25
494188|FBXO47
644165|BCRP3
128218|TMEM125
3123|HLA-DRB1
115361|GBP4
NA|GPR126
90273|CEACAM21
201294|UNC13D
360|AQP3
NA|AMICA1
29125|C11orf21
100418743|CCNL2P1
NA|MB21D1
79888|LPCAT1
951|CD37
106479304|RN7SL225P
374286|CDRT1
924|CD7
8787|RGS9
2869|GRK5
388121|TNFAIP8L3
5787|PTPRB
125206|SLC5A10
10235|RASGRP2
4855|NOTCH4
10347|ABCA7
348645|C22orf34
22998|LIMCH1
375298|CERKL
89849|ATG16L2
79652|TMEM204
162989|DEDD2
NA|FAM105A
5475|PPEF1
26157|GIMAP2
3106|HLA-B
5583|PRKCH
83593|RASSF5
100873245|MTND4P23
3700|ITIH4
8999|CDKL2
4242|MFNG
3134|HLA-F
644548|EXOC5P1
10497|UNC13B
4048|LTA4H
100131234|MIR181A1HG
91526|ANKRD44
3676|ITGA4
644714|LIMD1-AS1
2678|GGT1
8844|KSR1
22900|CARD8
84976|DISP1
83891|SNX25
3574|IL7
2627|GATA6
NA|C9orf142
7314|UBB
3710|ITPR3
55472|RBM12B-AS1
493861|EID3
727957|MROH1
1374|CPT1A
283989|TSEN54
2595|GANC
2244|FGB
2266|FGG
735|C9
2147|F2
462|SERPINC1
3273|HRG
336|APOA2
2168|FABP1
731|C8A
197|AHSG
3697|ITIH1
5005|ORM2
189|AGXT
1559|CYP2C9
4153|MBL2
10599|SLCO1B1
213|ALB
54363|HAO1
2538|G6PC
5340|PLG
10877|CFHR4
1555|CYP2B6
4018|LPA
866|SERPINA6
259|AMBP
28234|SLCO1B3
8529|CYP4F2
9971|NR1H4
7448|VTN
5053|PAH
100128665|FYTTD1P1
1370|CPN2
1544|CYP1A2
319|APOF
29974|A1CF
3242|HPD
1109|AKR1C4
58510|PRODH2
123876|ACSM2A
383|ARG1
3484|IGFBP1
3698|ITIH2
4143|MAT1A
348158|ACSM2B
83729|INHBE
54578|UGT1A6
3263|HPX
3626|INHBC
338|APOB
1576|CYP3A4
57817|HAMP
84647|PLA2G12B
NA|HFE2
635|BHMT
3034|HAL
1558|CYP2C8
2056|EPO
2642|GCGR
6580|SLC22A1
10050|SLC17A4
6514|SLC2A2
3083|HGFAC
2658|GDF2
433|ASGR2
1644|DDC
763|CA5A
170392|OIT3
3081|HGD
133688|UGT3A1
134526|ACOT12
733|C8G
118471|PRAP1
10|NAT2
2626|GATA4
8858|PROZ
7104|TM4SF4
2646|GCKR
26998|FETUB
11199|ANXA10
2161|F12
283460|HNF1A-AS1
29034|CPS1-IT1
6927|HNF1A
104355288|LINC01320
4495|MT1G
64240|ABCG5
5444|PON1
9480|ONECUT2
10786|SLC17A3
51179|HAO2
1557|CYP2C19
1373|CPS1
256394|SERPINA11
388646|GBP7
130013|ACMSD
283375|SLC39A5
3053|SERPIND1
1582|CYP8B1
8856|NR1I2
27329|ANGPTL3
9154|SLC28A1
NA|C14orf105
64577|ALDH8A1
339221|ENPP7
256764|WDR72
1807|DPYS
8608|RDH16
3818|KLKB1
2155|F7
1356|CP
84675|TRIM55
2998|GYS2
5858|PZP
55089|SLC38A4
144193|AMDHD1
92292|GLYATL1
27232|GNMT
3171|FOXA3
171483|FAM9B
1579|CYP4A11
6564|SLC15A1
79054|TRPM8
116844|LRG1
647309|GMNC
895|CCND2P1
1|A1BG
5370|PMCHL2
100506207|HULC
10991|SLC38A3
5345|SERPINF2
196410|METTL7B
100873993|ITIH4-AS1
5244|ABCB4
10107|TRIM10
3249|HPN
653190|ABCC6P1
3990|LIPC
202299|LINC01554
284541|CYP4A22
53841|CDHR5
441154|RPL7AP34
6462|SHBG
3158|HMGCS2
221223|CES5A
80339|PNPLA3
731656|LINC01348
164656|TMPRSS6
29881|NPC1L1
1943|EFNA2
727|C5
NA|CTD-3080P12
1409|CRYAA
91828|EXOC3L4
1244|ABCC2
6289|SAA2
8876|VNN1
725|C4BPB
166012|CHST13
5648|MASP1
NA|LINC00864
130|ADH6
22809|ATF5
10998|SLC27A5
7274|TTPA
1339|COX6A2
340811|AKR1C8P
283587|LINC01146
10747|MASP2
23562|CLDN14
124|ADH1A
91614|DEPDC7
NA|HRSP12
11209|MST1P2
1757|SARDH
83854|ANGPTL6
57057|TBX20
3290|HSD11B1
116842|LEAP2
1565|CYP2D6
4485|MST1
100132234|LINC00543
3960|LGALS4
9075|CLDN2
105371027|PCSK6-AS1
7429|VIL1
121599|SPIC
12|SERPINA3
57834|CYP4F11
1491|CTH
374569|ASPG
83953|FCAMR
23491|CES3
2328|FMO3
NA|C1orf168
8564|KMO
127845|GOLT1A
1733|DIO1
246778|IL27
629|CFB
388323|GLTPD2
100528017|SAA2-SAA4
11136|SLC7A9
414134|NANOGP6
2888|GRB14
NA|ARSE
2877|GPX2
13|AADAC
5446|PON3
91703|ACY3
55937|APOM
978|CDA
80168|MOGAT2
100421581|GCNT1P3
55821|ALLC
NA|CTSLP7
5024|P2RX3
NA|ZCCHC16
10166|SLC25A15
103689918|LINC01378
9388|LIPG
100861504|LINC00538
5314|PKHD1
100132467|RNF2P1
5343|PLGLB1
100131964|RPL7L1P3
6480|ST6GAL1
1962|EHHADH
55244|SLC47A1
2203|FBP1
5046|PCSK6
203111|ERICH5
368|ABCC6
6652|SORD
53345|TM6SF2
11223|MST1L
64081|PBLD
112817|HOGA1
79962|DNAJC22
3638|INSIG1
2779|GNAT1
389643|NUGGC
435|ASL
8659|ALDH4A1
100270895|RPL7AP15
89866|SEC16B
29958|DMGDH
63910|SLC17A9
143941|TTC36
342979|PALM3
100130074|KRT17P8
100421424|HNRNPA1P29
197257|LDHD
80350|LPAL2
NA|HP09025
NA|KARSP2
1564|CYP2D7
2159|F10
23516|SLC39A14
3149|HMGB3
113675|SDSL
5629|PROX1
9963|SLC23A1
222643|UNC5CL
3426|CFI
200931|SLC51A
10110|SGK2
1723|DHODH
2330|FMO5
27141|CIDEB
392636|AGMO
720|C4A
100874146|LINC00365
55811|ADCY10
132158|GLYCTK
4284|MIP
3174|HNF4G
388182|SPATA41
6799|SULT1A2
2875|GPT
2494|NR5A2
23743|BHMT2
5447|POR
63951|DMRTA1
100874111|STEAP3-AS1
100421589|LRRC37A7P
2593|GAMT
5091|PC
392387|AHCYP2
6542|SLC7A2
22928|SEPHS2
100131743|GAPDHP40
162417|NAGS
6641|SNTB1
6470|SHMT1
2542|SLC37A4
2027|ENO3
79589|RNF128
36|ACADSB
NA|KIAA1161
51734|MSRB1
3293|HSD17B3
6581|SLC22A3
1593|CYP27A1
55540|IL17RB
3075|CFH
6382|SDC1
8824|CES2
64284|RAB17
1942|EFNA1
30|ACAA1
26238|LINC01558
653857|ACTR3C
81543|LRRC3
153163|MGC32805
710|SERPING1
22949|PTGR1
1717|DHCR7
7855|FZD5
90586|AOC4P
55526|DHTKD1
55020|TTC38
133686|NADK2
25841|ABTB2
66002|CYP4F12
10117|ENAM
26063|DECR2
5045|FURIN
55890|GPRC5C
4357|MPST
55796|MBNL3
29760|BLNK
95|ACY1
2110|ETFDH
440352|SNX29P2
171425|CLYBL
1718|DHCR24
283377|SPRYD4
137872|ADHFE1
55240|STEAP3
8646|CHRD
3155|HMGCL
5465|PPARA
1376|CPT2
100133612|LINC01134
8714|ABCC3
2053|EPHX2
58488|PCTP
100421390|EIF5P1
285440|CYP4V2
28970|C11orf54
540|ATP7B
6472|SHMT2
55277|FGGY
221078|NSUN6
55286|C4orf19
8508|NIPSNAP1
11057|ABHD2
23169|SLC35D1
949|SCARB1
9942|XYLB
55132|LARP1B
5256|PHKA2
5095|PCCA
3570|IL6R
728841|NBPF8
100526760|ABHD14A-ACY1
79783|SUGCT
84129|ACAD11
125488|TTC39C
51361|HOOK1
NA|NUDT16P1
101929655|TMC3-AS1
NA|SELO
NA|C19orf66
55268|ECHDC2
220441|RNF152
3295|HSD17B4
55638|SYBU
5774|PTPN3
10157|AASS
147525|LINC00526
7410|VAV2
NA|TMEM110-MUSTN1
3712|IVD
254427|PROSER2
NA|GPR125
283927|NUDT7
10243|GPHN
79784|MYH14
80344|DCAF11
NA|C3orf67
106481837|RN7SL328P
101101775|TMEM220-AS1
51390|AIG1
NA|NUP50-AS1
84804|MFSD9
257169|C9orf43
79762|C1orf115
6478|SIAH2
23277|CLUH
222484|LNX2
8738|CRADD
9722|NOS1AP
NA|PQLC1
158584|FAAH2
NA|C1orf111
1371|CPOX
NA|KIAA1598
64080|RBKS
6256|RXRA
55664|CDC37L1
399687|MYO18A
114789|SLC25A25
360184|CYCSP38
642273|FAM110C
NA|CTAGE5
83752|LONP2
10458|BAIAP2
8045|RASSF7
51523|CXXC5
11282|MGAT4B
150962|PUS10
1729|DIAPH1
57530|CGN
9563|H6PD
84447|SYVN1
83641|FAM107B
163590|TOR1AIP2
23417|MLYCD
NA|PPAPDC2
10244|RABEPK
23189|KANK1
6674|SPAG1
145482|PTGR2
10586|MAB21L2
2035|EPB41
94103|ORMDL3
55160|ARHGEF10L
55971|BAIAP2L1
55103|RALGPS2
80321|CEP70
NA|UFD1L
23528|ZNF281
80724|ACAD10
9924|PAN2
85007|PHYKPL
7088|TLE1
4041|LRP5
3141|HLCS
51231|VRK3
7844|RNF103
2800|GOLGA1
100505854|APTR

## Sheet: Significant DGE mod AURORA
AURORA_DGE modules_List_All subtypes_p.adj<0.05	AURORA_DGE modules_Beta-value_All subtypes_p.adj<0.05	AURORA_DGE modules_List_Lums-HER2E_p.adj<0.05	AURORA_DGE modules_Beta-value_Lums-HER2E_p.adj<0.05	AURORA_DGE modules_List_Basal_p.adj<0.05	AURORA_DGE modules_Beta-value_Basal_p.adj<0.05	AURORA_DGE modules_List_Brain_p.adj<0.05	AURORA_DGE modules_Beta-value_Brain_p.adj<0.05	AURORA_DGE modules_List_Liver_p.adj<0.05	AURORA_DGE modules_Beta-value_Liver_p.adj<0.05
Early_Relapse_ER.Pos_33_JAMA.2011_PMID.21558518	0.729008	Pcorr_Hypoxia_Low_Correlation_PLoS.Med.2006_PMID.16417408	1.0398	HGF_down_BCR.2013_PMID.24025166	1.00968	Scorr_EMAT3_Correlation_BCR.2020_PMID.32641077	1.48382	Pcorr_Breast2Lung_Parental_Correlation_Nature.2005_PMID.16049480	0.750485
MET_DOWN_Significant_Genes_LOW_BASALS_2_Genes_JCI.2018_PMID.29480819	0.708516	Scorr_EMAT3_Correlation_BCR.2020_PMID.32641077	0.954823	Inflammatory_Breast_Cancer_79_nIBC_CCR.2013_PMID.23396049	0.9455	MM_p53null_1pFDR_UP_Genome.Biology.2007_PMID.17493263	-1.01145	Pcorr_Breast2Lung_LM2_Correlation_Nature.2005_PMID.16049480	-0.988117
X5Q_Breast.Cancer.Res.Treat.2012_PMID.22048815	0.636511	Lums_HER2E_UP_metastatic.signature_JCI.2020_PMID.32573490	0.805064	JANES_Oscillation_GDF11_TGFBR3_Nat.Cell.Biol.2014_PMID.24658685	0.935333	T_regulatory_cell_2gene_PMID.31942077	-1.16152	MM_Squamous.like_Genome.Biol.2013_PMID.24220145	-1.48365
Scorr_EMAT3_Correlation_BCR.2020_PMID.32641077	0.633458	Euclidean_Distance_2_CLOW_Euclidean.Distance_BCR.2010_PMID.20813035	0.716916	MET_DOWN_Significant_Genes_LOW_BASALS_2_Genes_JCI.2018_PMID.29480819	0.918459	CIBERSORT_Mast_cells_resting_Nat.Methods.2015_PMID.25822800	-1.30248	TCGA.BRCA.1198_UNKNOWN3_JCI.2020_PMID.32573490	-1.49523
Inflammatory_Breast_Cancer_79_nIBC_CCR.2013_PMID.23396049	0.631517	Pcorr_IGS_Correlation_NJEM.2007_PMID.17229949	0.706259	Scorr_EMAT2_Correlation_BCR.2020_PMID.32641077	0.886056	Lim2009_Stroma_Adam_PMID.25575446	-1.30966	IMMUNE_Bindea_Cell_Lymph_vessels_Immunity.2013_PMID.24138885	-1.52058
HGF_down_BCR.2013_PMID.24025166	0.615067	Pcorr_Breast2Lung_Parental_Correlation_Nature.2005_PMID.16049480	0.665624	Scorr_IE_Correlation_JCO.2006_PMID.16505416	0.849134	Stromal_Up_Nat.Med.2009_PMID.19648928	-1.37446	Fibroblast_Cluster_BMC.Med.Genomics.2011_PMID.21214954	-1.53452
Pcorr_primitive_CCR.2010_PMID.20643781	0.591758	Pcorr_Dasatinib_L_Correlation_Cancer.Res.2007_PMID.17332353	0.656063	Inflammatory_Breast_Cancer_491_nIBC_CCR.2013_PMID.23396049	0.835275	MCD3_CD8_BMC.Med.Genomics.2011_PMID.21214954	-1.38462	aMaSC_HsEnriched_Refined1_BCR.2015_PMID.25575446	-1.55315
Scorr_S329_R_Correlation_Br.J.Cancer.2008_PMID.18382427	0.569202	GSEA_GP17_Basal_signaling.r.0.958_SMID_BREAST_CANCER_BASAL_UP	-0.401992	Late_IRS_2_PLoS.One.2016_PMID.26991655	0.80804	aStr_Lim09_BCR.2015_PMID.25575446	-1.38542	MM_Wnt1.Early_Genome.Biol.2013_PMID.24220145	-1.57007
MET_DOWN_RNA_Seq_Significant_Genes_JCI.2018_PMID.29480819	0.559688	Stingl_Down_Basal_High_Nat.Cell.Biol.2014_PMID.25173976	-0.473675	MS_CD44_DOWN_PNAS.2009_PMID.19666588	0.712579	CIBERSORT_T_cells_CD4_naive_Nat.Methods.2015_PMID.25822800	-1.39607	MVEGFC_BMC.Med.Genomics.2011_PMID.21214954	-1.58805
Pcorr_Dasatinib_L_Correlation_Cancer.Res.2007_PMID.17332353	0.542009	Lim.et.al.2010.Conserved.Luminal.Progenitor_BCR.2010_PMID.20346151	-0.478551	Interferon_Cluster_BMC.Med.Genomics.2011_PMID.21214954	-0.762284	IMMUNE_Bindea_Cell_Lymph_vessels_Immunity.2013_PMID.24138885	-1.4028	MM_Claudinlow_Genome.Biol.2013_PMID.24220145	-1.6272
MITO2_BMC.Med.Genomics.2011_PMID.21214954	0.541194	TCGA.BRCA.1198_BASAL_JCI.2020_PMID.32573490	-0.49902	TCGA.BRCA.1198_immune_CTLA4_CXCL_FOXP3_JCI.2020_PMID.32573490	-0.906043	Immune_Suppression_Kardos_JCI.Insight.2016_PMID.27699256	-1.43272	TCGA.BRCA.1198_COLLAGEN11A_JCI.2020_PMID.32573490	-1.6396
MM_NeuPyMT_1pFDR_UP_Genome.Biology.2007_PMID.17493263	0.537605	Luminal_Progenitor_Down_Nat.Med.2009_PMID.19648928	-0.547898	IMMUNE_Bindea_Cell_aDC_Immunity.2013_PMID.24138885	-0.911397	LCK_Breast.Cancer.Research.2008_PMID.19272155	-1.43401	MDACC.FNA.2_J.Clin.Oncol.2010_PMID.20805453	-1.67545
Inflammatory_Breast_Cancer_491_nIBC_CCR.2013_PMID.23396049	0.510936	VEGF_13genes_BMC.Med.2009_PMID.19291283	-0.586938	IMMUNE_PEREZ_14_JCO.2015_PMID.2560586	-0.938044	Miller_T_NK_Metagene_Genome_Biol_2013_PMID.23618380	-1.45391	EMT_UP_Weinberg_PNAS.2010_PMID.20713713	-1.67805
Euclidean_Distance_2_CLOW_Euclidean.Distance_BCR.2010_PMID.20813035	0.49183	BASAL_Cluster_BMC.Med.Genomics.2011_PMID.21214954	-0.588937	Scorr_IIE_Correlation_JCO.2006_PMID.16505416	-0.94637	Pfefferle2012_Stroma_PMID.25575446	-1.45696	MBASAL_BMC.Med.Genomics.2011_PMID.21214954	-1.6812
MNADH_CYTochrome_BMC.Med.Genomics.2011_PMID.21214954	0.454517	MIR_200c_Induced_ONCO.2015_PMID.25746005	-0.624472	GSEA_GP11_Immune_IFN.r.0.965_PerouLab_MInterferon_Cluster_BMC_Med_Genomics_2011_PMID.21214954	-0.955159	EMT_UP_Weinberg_PNAS.2010_PMID.20713713	-1.47152	MIR_200c_Repressed_ONCO.2015_PMID.25746005	-1.69463
Luminal_Progenitor_Up_Nat.Med.2009_PMID.19648928	-0.275051	GSEA_GP21_Anti_apoptosis_DNA_stability.r.0.877_MORF_BCL2	-0.639796	Down_regulated_upon_N_RAS_repression_Cell_Rep.2015_PMID.26166574	-0.95629	Duke_Module22_tnfa_Mike_PMID.20335537	-1.47517	Fibromatosis_Lab.Invest.2008_PMID.18414401	-1.72435
Shehata2012_ALDHpos_PMID.25575446	-0.347151	MS_CD44_UP_PNAS.2009_PMID.19666588	-0.666949	STAT1_Breast.Cancer.Research.2008_PMID.19272155	-0.959641	CIBERSORT_T_cells_follicular_helper_Nat.Methods.2015_PMID.25822800	-1.48127	GSEA_GP4_MES_ECM.r.0.954_PerouLab_HS_Red7_BMC_Med_Genomics_2011_PMID.21214954	-1.78855
Scorr_IIE_Correlation_JCO.2006_PMID.16505416	-0.398093	GSEA_GP6_Squamous_differentiation_development.r.0.902_RICKMAN_TUMOR_DIFFERENTIATED_WELL_VS_POORLY_DN	-0.670968	STAT3_Basal_Horvath_SHORT_PNAS.2014_PMID.25139989	-0.981906	Stingl_Down_CLOW_High_Nat.Cell.Biol.2014_PMID.25173976	-1.4855	Murat_G07_J.Clin.Oncol.2008_PMID.18565887	-1.79195
Lim.et.al.2010.Conserved.Luminal.Progenitor_BCR.2010_PMID.20346151	-0.443668	Up_regulated_by_Oncogenic_N_RAS_Cell_Rep.2015_PMID.26166574	-0.680948	Influenza_11genes_Metasignature_KHATRI_Immunity.2015_PMID.26682989	-0.984095	MECM_BMC.Med.Genomics.2011_PMID.21214954	-1.48979	REPLICATION_STRESS_UP_SET_Cell.Rep.2018_PMID.29768207	-1.82757
Pcorr_basal_CCR.2010_PMID.20643781	-0.484124	Pcorr_Dasatinib_R_Correlation_Cancer.Res.2007_PMID.17332353	-0.687474	IgG_Breast.Cancer.Research.2008_PMID.19272155	-0.994192	CIBERSORT_T_cells_CD8_Nat.Methods.2015_PMID.25822800	-1.49217	REPLICATION_STRESS_POS_Cell.Rep.2018_PMID.29768207	-1.84186
IMMUNE_Bindea_Cell_aDC_Immunity.2013_PMID.24138885	-0.522514	ADM_S100A10_A110NDGR1_Cluster_BMC.Med.Genomics.2011_PMID.21214954	-0.714438	CIBERSORT_Eosinophils_Nat.Methods.2015_PMID.25822800	-1.00792	aStr_Shehata_BCR.2015_PMID.25575446	-1.49584	High_In_No_Response_MCP_TLS_Melanoma_PMID.31942075	-1.8497
MIR_200c_Induced_ONCO.2015_PMID.25746005	-0.532378	Pcorr_squamoid_PLOS.2012_PMID.22590557	-0.714907	CTLA4_Single_Gene	-1.022	IMMUNE_PEREZ_14_JCO.2015_PMID.2560586	-1.49641	TCGA_TGFB_score_21050467_Immunity.2018_PMID._29628290	-1.86703
MS_CD44_UP_PNAS.2009_PMID.19666588	-0.5419	MNOtch4_BMC.Med.Genomics.2011_PMID.21214954	-0.715842	GSEA_GP2_Immune_Tcell_Bcell.r.0.964_KEGG_HEMATOPOIETIC_CELL_LINEAGE	-1.04675	Shehata2012_Stroma_PMID.25575446	-1.50278
Spike2012_aMaSC_PMID.25575446	-0.549445	Scorr_S329_L_Correlation_Br.J.Cancer.2008_PMID.18382427	-0.730771	T_regulatory_cell_2gene_PMID.31942077	-1.05394	IMMUNE_Bindea_Cell_T_cells_Immunity.2013_PMID.24138885	-1.51315
Pcorr_Dasatinib_R_Correlation_Cancer.Res.2007_PMID.17332353	-0.569737	TNBC_Clinically_Relevant_Good.230_BCR.2011_PMID.21978456	-0.762965	T_RM_Cell_single_cell_signature_Savas_Nat_Med.2018_PMID.29942092	-1.05556	IMMUNE_PEREZ_87_JCO.2015_PMID.2560586	-1.51555
Up_regulated_by_Oncogenic_N_RAS_Cell_Rep.2015_PMID.26166574	-0.57488	IMMUNE_Bindea_Cell_Lymph_vessels_Immunity.2013_PMID.24138885	-0.769781	Duke_Module10_ifna_Mike_PMID.20335537	-1.0562	CIBERSORT_T_cells_CD4_memory_activated_Nat.Methods.2015_PMID.25822800	-1.52324
Pcorr_squamoid_PLOS.2012_PMID.22590557	-0.576575	TCGA.BRCA.1198_IL8_CCL_JCI.2020_PMID.32573490	-0.775568	Miller_B_P_Metagene_Genome_Biol_2013_PMID.23618380	-1.05797	aStr_HsEnriched_Refined2_BCR.2015_PMID.25575446	-1.5324
Wahl_aMaSC_Signature_Cell.Stem.Cell.2012_PMID.22305568	-0.588094	Early_IRS_2_PLoS.One.2016_PMID.26991655	-0.784318	IMMUNE_Bindea_Cell_TFH_Immunity.2013_PMID.24138885	-1.06506	Durvalumab_signature_Higgs_Clin.Cancer.Res.2018_PMID.29716923	-1.53646
CIBERSORT_Macrophages_M0_Nat.Methods.2015_PMID.25822800	-0.5936	FOS_JUN_Cluster_BMC.Med.Genomics.2011_PMID.21214954	-0.801015	TCGA_Tfh_cells_Immunity.2018_PMID._29628290	-1.06506	TCGA.BRCA.1198_immune_GIMAP_IL16_JCI.2020_PMID.32573490	-1.53941
TCGA.BRCA.1198_IL8_CCL_JCI.2020_PMID.32573490	-0.601051	aMaSC_HsEnriched_Refined1_BCR.2015_PMID.25575446	-0.813406	Duke_Module11_ifng_Mike_PMID.20335537	-1.07445	CIBERSORT_T_cells_CD4_memory_resting_Nat.Methods.2015_PMID.25822800	-1.54159
Stingl_Day7_Downregulated_Nat.Cell.Biol.2014_PMID.25173976	-0.603094	TCGA.BRCA.1198_immune_FOS_JUN_IL6_JCI.2020_PMID.32573490	-0.815301	IMMUNE_Bindea_Cell_B_cells_Immunity.2013_PMID.24138885	-1.07935	aStr_HsEnriched_BCR.2015_PMID.25575446	-1.5427
Duke_Module20_stat3_Mike_PMID.20335537	-0.603284	TNBC_Clinically_Relevant_Poor.26_BCR.2011_PMID.21978456	-0.833551	Stromal_Inflammation_J.Pathol.2017_PMID.27861902	-1.08401	HS_Green14_BMC.Med.Genomics.2011_PMID.21214954	-1.5563
CIBERSORT_Monocytes_Nat.Methods.2015_PMID.25822800	-0.606778	Mouse_Human_ImmuneProfiles_SHAY_M_H_Induced_in_NK_PNAS.2013_PMID.23382184_	-0.837481	CIBERSORT_T_cells_CD4_memory_activated_Nat.Methods.2015_PMID.25822800	-1.08815	IMMUNE_Bindea_Cell_TReg_Immunity.2013_PMID.24138885	-1.57789
GSEA_GP15_EGF_signailng.r.0.936_NAGASHIMA_EGF_SIGNALING_UP	-0.610142	Pcorr_Breast2Lung_LM2_Correlation_Nature.2005_PMID.16049480	-0.839888	Durvalumab_signature_Higgs_Clin.Cancer.Res.2018_PMID.29716923	-1.09077	GSEA_BIOCARTA_CTLA4_PATHWAY	-1.58041
IMMUNE_Bindea_Cell_Tem_Immunity.2013_PMID.24138885	-0.615301	TCGA.BRCA.1198_UNKNOWN3_JCI.2020_PMID.32573490	-0.852604	Tcell_EXH_Anti_PDL1_vs_control_treated_exhausted_CD8_T_cell_Metagene_1_Science.2016_PMID.27789795	-1.09274	CTLA4_Single_Gene	-1.58358
Bcell_IL10_PLUS_LIN_J_Immunol.2014_PMID.25080484	-0.616306	Mouse_Human_ImmuneProfiles_SHAY_M_H_Induced_in_MO_PNAS.2013_PMID.23382184_	-0.854487	GSEA_GP2_Immune_Tcell_Bcell.r.0.949_PerouLab_Immune_cell_Cluster_BMC_Med_Genomics_2011_PMID.21214954	-1.10675	STAT3_Basal_Horvath_SHORT_PNAS.2014_PMID.25139989	-1.58367
Durvalumab_signature_Higgs_Clin.Cancer.Res.2018_PMID.29716923	-0.616572	High_In_No_Response_MCP_TLS_Melanoma_PMID.31942075	-0.8579	TCGA.BRCA.1198_immune_CD4_CD53_CD84_BTK_JCI.2020_PMID.32573490	-1.11686	T_RM_Cell_single_cell_signature_Savas_Nat_Med.2018_PMID.29942092	-1.63312
Lim2010_LumProg_Adam_PMID.25575446	-0.616818	aStr_Shehata_BCR.2015_PMID.25575446	-0.864124	GSEA_BIOCARTA_CTLA4_PATHWAY	-1.11703	MERCK_Immune_signature_Science.2018_PMID.30309915	-1.65566
Bcell_Tcell_Cooperation_Cell.2019_PMID.31730857	-0.628462	MM_p53null.Basal_Genome.Biol.2013_PMID.24220145	-0.869419	Cytotoxic_lymphocytes_MCP_PMID.31942075_PMID.31942077	-1.12423	MM_Claudinlow_Genome.Biol.2013_PMID.24220145	-1.66451
T_regulatory_cell_2gene_PMID.31942077	-0.629268	Duke_Module21_tgfb_Mike_PMID.20335537	-0.876331	PDCD1_Single_Gene	-1.12549	Fibromatosis_Lab.Invest.2008_PMID.18414401	-1.67302
Tcell_EXH_Memory_CD8_T_cell_a_vs_Naive_CD8_T_cell_Metagene_1_Science.2016_PMID.27789795	-0.630431	METAPLASTIC_Up_CanRes.2009_PMID.19435916	-0.878736	CIBERSORT_T_cells_CD4_memory_resting_Nat.Methods.2015_PMID.25822800	-1.13413	GSEA_GP4_MES_ECM.r.0.954_PerouLab_HS_Red7_BMC_Med_Genomics_2011_PMID.21214954	-1.69406
STAT3_Basal_Horvath_PNAS.2014_PMID.25139989	-0.633723	MM_DMBAwnt_1pFDR_UP_Genome.Biology.2007_PMID.17493263	-0.881696	IMMUNE_Bindea_Cell_TReg_Immunity.2013_PMID.24138885	-1.14789	STAT3_Basal_Horvath_PNAS.2014_PMID.25139989	-1.71987
MM_Class8_Genome.Biol.2013_PMID.24220145	-0.636056	Bcells_Centrocyte_J.Clin.Oncol.2015_PMID.25800755	-0.882419	IMMUNE_Bindea_Cell_Cytotoxic_cells_Immunity.2013_PMID.24138885	-1.15159	CIBERSORT_Dendritic_cells_activated_Nat.Methods.2015_PMID.25822800	-1.72868
GO_DOWN_with_SOX10_OE_Cell.Rep.2015_PMID.26365194	-0.638013	aStr_Prat_BCR.2015_PMID.25575446	-0.884257	CIBERSORT_Macrophages_M1_Nat.Methods.2015_PMID.25822800	-1.16429	MM_Potluck_1pFDR_UP_Genome.Biology.2007_PMID.17493263	-1.77164
Tcell_EXH_Memory_CD8_T_cell_a_vs_Naive_CD8_T_cell_Metagene_3_Science.2016_PMID.27789795	-0.639917	MM_Potluck_1pFDR_UP_Genome.Biology.2007_PMID.17493263	-0.888367	CIBERSORT_T_cells_regulatory_Tregs_Nat.Methods.2015_PMID.25822800	-1.16862	TCGA.BRCA.1198_immune_CTLA4_CXCL_FOXP3_JCI.2020_PMID.32573490	-1.80042
TLS_Hallmark_Gene_Signature_PMID.31942071	-0.642602	MECM_BMC.Med.Genomics.2011_PMID.21214954	-0.892652	T.cells_MCP_PMID.31942075_PMID.31942077	-1.16943	Verhaak_Stromal_Nat.Commun.2013_PMID.24113773	-1.81825
MM_Claudinlow_Genome.Biol.2013_PMID.24220145	-0.644175	TCGA.BRCA.1198_UNKNOWN2_JCI.2020_PMID.32573490	-0.894518	CIBERSORT_NK_cells_activated_Nat.Methods.2015_PMID.25822800	-1.17354	Tcell_EXH_Memory_CD8_T_cell_a_vs_Naive_CD8_T_cell_Metagene_2_Science.2016_PMID.27789795	-1.98302
Bcell_IL10_MINUS_LIN_J_Immunol.2014_PMID.25080484	-0.644301	IMMUNE_Bindea_Cell_Neutrophils_Immunity.2013_PMID.24138885	-0.902512	IMMUNE_PEREZ_87_JCO.2015_PMID.2560586	-1.17876	Tcell_EXH_Exhausted_CD8_T_cell_vs_Naive_CD8_T_cell_Metagene_3_Science.2016_PMID.27789795	-2.06732
TNBC_Clinically_Relevant_Good.26_BCR.2011_PMID.21978456	-0.644536	MM_Wnt1.Early_Genome.Biol.2013_PMID.24220145	-0.907904	CIBERSORT_NK_cells_resting_Nat.Methods.2015_PMID.25822800	-1.17885
TCGA.BRCA.1198_immune_CD19_JCI.2020_PMID.32573490	-0.645875	Vascular.Content_Clin.Exp.Metastasis.2014_PMID.23975155	-0.922732	TCGA.BRCA.1198_IMMUNOGLOBULIN_PMID.26451490	-1.17897
TCGA.BRCA.1198_immune_GIMAP_IL16_JCI.2020_PMID.32573490	-0.652955	AMPH_EPIREGULIN_Cluster_BMC.Med.Genomics.2011_PMID.21214954	-0.93364	Immune_Suppression_Kardos_JCI.Insight.2016_PMID.27699256	-1.1801
Bcells_Centrocyte_J.Clin.Oncol.2015_PMID.25800755	-0.653139	Lim2010_Stroma_Adam_PMID.25575446	-0.95073	TLS_Known_MARKERS_PMID.31942071	-1.19321
Mouse_Human_ImmuneProfiles_SHAY_M_H_Induced_in_MO_PNAS.2013_PMID.23382184_	-0.6538	Wahl_fSTR_Signature_Cell.Stem.Cell.2012_PMID.22305568	-0.951404	CIBERSORT_T_cells_CD8_Nat.Methods.2015_PMID.25822800	-1.1987
Scorr_EMAT1_Correlation_BCR.2020_PMID.32641077	-0.656082	MDSC_tumor_MO_Schlecker_J.Immunol.2012_PMID.23152559	-0.951775	CIBERSORT_T_cells_CD4_naive_Nat.Methods.2015_PMID.25822800	-1.20202
TCGA.BRCA.1198_IMMUNE1_JCI.2020_PMID.32573490	-0.657015	aStr_HsEnriched_Refined1_BCR.2015_PMID.25575446	-0.957272	CIBERSORT_T_cells_gamma_delta_Nat.Methods.2015_PMID.25822800	-1.20882
MacTh1_cluster_Iglesia_CCR.2014_PMID.24916698	-0.657289	Mature_Luminal_Down_Nat.Med.2009_PMID.19648928	-0.963592	CD8_cluster_Iglesia_CCR.2014_PMID.24916698	-1.23085
IGG_Cluster_BMC.Med.Genomics.2011_PMID.21214954	-0.665441	PDGFRB_Single_Gene	-0.966765	Immune_Hot_using_CD8_vs_Cold_PMID.31942071	-1.23282
TCGA_CSF1_response_Immunity.2018_PMID._29628290	-0.666115	FOXC1_Hair_Follicles_Wang_SCIENCE.2016_P30C.LO.vs.WT_Negative_PMID.26912704	-0.978227	DAN_ImmuneActive_Cell.2019_PMID.31730857	-1.23308
IMMUNE_Bindea_Cell_B_cells_Immunity.2013_PMID.24138885	-0.668081	MM_Myoepithelioma.like_Genome.Biol.2013_PMID.24220145	-0.986864	TNBC_Clinically_Relevant_Good.26_BCR.2011_PMID.21978456	-1.24035
IMMUNE_Bindea_Cell_Cytotoxic_cells_Immunity.2013_PMID.24138885	-0.672619	Up_regulated_upon_N_RAS_repression_Cell_Rep.2015_PMID.26166574	-0.990763	LCK_Breast.Cancer.Research.2008_PMID.19272155	-1.24052
Tcell_EXH_Exhausted_CD8_T_cell_vs_Naive_CD8_T_cell_Metagene_1_Science.2016_PMID.27789795	-0.674416	Pfefferle2012_Stroma_PMID.25575446	-0.995361	MERCK_Immune_signature_Science.2018_PMID.30309915	-1.24224
TLS_New_9Gene_Signature_PMID.31942071	-0.675583	Pcorr_Hypoxia_High_Correlation_PLoS.Med.2006_PMID.16417408	-0.997338	Immune_High_In_Response_MCP_TLS_Melanoma_PMID.31942075	-1.24603
TCGA.BRCA.1198_immune_CTLA4_CXCL_FOXP3_JCI.2020_PMID.32573490	-0.680093	aStr_HsEnriched_Refined2_BCR.2015_PMID.25575446	-0.99802	TCGA.BRCA.1198_immune_CD8_GZMK_JCI.2020_PMID.32573490	-1.25825
Tcell_EXH_Memory_CD8_T_cell_a_vs_Naive_CD8_T_cell_Metagene_2_Science.2016_PMID.27789795	-0.68065	GSEA_GP15_EGF_signailng.r.0.936_NAGASHIMA_EGF_SIGNALING_UP	-1.00453	T_Cell_cluster_Iglesia_CCR.2014_PMID.24916698	-1.25891
Lums_HER2E_DOWN_metastatic.signature_JCI.2020_PMID.32573490	-0.683779	MIR_200c_Repressed_ONCO.2015_PMID.25746005	-1.00987	IGG_Cluster_BMC.Med.Genomics.2011_PMID.21214954	-1.26138
TCGA.BRCA.1198_immune_CD4_CD53_CD84_BTK_JCI.2020_PMID.32573490	-0.684193	Verhaak_Stromal_Nat.Commun.2013_PMID.24113773	-1.01034	TCGA_LIexpression_score_Immunity.2018_PMID._29628290	-1.26705
CIBERSORT_Dendritic_cells_activated_Nat.Methods.2015_PMID.25822800	-0.684647	Lim2009_Stroma_Adam_PMID.25575446	-1.01486	TCGA.BRCA.1198_immune_HLA_A_F_JCI.2020_PMID.32573490	-1.26896
Immune_Hot_using_CD8_vs_Cold_PMID.31942071	-0.685031	aStr_Lim09_BCR.2015_PMID.25575446	-1.02432	CORE_B_CELL_signatures_Garber_Cell.Mol.Gastroenterol.Hepatol.2017_PMID.28508029	-1.26985
Mouse_Human_ImmuneProfiles_SHAY_M_H_Induced_in_GN_PNAS.2013_PMID.23382184_	-0.686235	Stingl_Down_CLOW_High_Nat.Cell.Biol.2014_PMID.25173976	-1.02516	GSEA_PD1_SIGNALING_REACTOME	-1.27015
IMMUNE_Bindea_Cell_TReg_Immunity.2013_PMID.24138885	-0.688666	Stingl_Day7_Downregulated_Nat.Cell.Biol.2014_PMID.25173976	-1.02625	TCGA.BRCA.1198_immune_CD19_JCI.2020_PMID.32573490	-1.2785
MBASAL_BMC.Med.Genomics.2011_PMID.21214954	-0.690732	aStr_HsEnriched_BCR.2015_PMID.25575446	-1.02765	TCGA.BRCA.1198_IMMUNE1_JCI.2020_PMID.32573490	-1.27929
STAT3_Basal_Horvath_SHORT_PNAS.2014_PMID.25139989	-0.691	Duke_Module20_stat3_Mike_PMID.20335537	-1.04547	Miller_T_NK_Metagene_Genome_Biol_2013_PMID.23618380	-1.28666
LOBULAR_TCGA_SIGNATURE_Immune_related_Cell.2015_PMID.26451490	-0.692811	MM_Claudinlow_Genome.Biol.2013_PMID.24220145	-1.04911	MCD3_CD8_BMC.Med.Genomics.2011_PMID.21214954	-1.28922
GSEA_GP2_Immune_Tcell_Bcell.r.0.949_PerouLab_Immune_cell_Cluster_BMC_Med_Genomics_2011_PMID.21214954	-0.693983	Stromal_Up_Nat.Med.2009_PMID.19648928	-1.05703	CIBERSORT_T_cells_follicular_helper_Nat.Methods.2015_PMID.25822800	-1.29591
CIBERSORT_Eosinophils_Nat.Methods.2015_PMID.25822800	-0.708279	MDSC_Neutrophil_Youn_J_Leukoc_Biol.2012_PMID.21954284	-1.05708	B_lineage_MCP_PMID.31942075_PMID.31942077	-1.32617
MM_Squamous.like_Genome.Biol.2013_PMID.24220145	-0.709987	EMT_UP_Weinberg_PNAS.2010_PMID.20713713	-1.06169	CIBERSORT_B_cells_naive_Nat.Methods.2015_PMID.25822800	-1.32948
Scorr_S329_L_Correlation_Br.J.Cancer.2008_PMID.18382427	-0.714381	GO_DOWN_with_SOX10_OE_Cell.Rep.2015_PMID.26365194	-1.06625	Bcell_Tcell_Cooperation_Cell.2019_PMID.31730857	-1.34211
CIBERSORT_Macrophages_M1_Nat.Methods.2015_PMID.25822800	-0.716876	Fibroblasts_MCP_PMID.31942075_PMID.31942077	-1.07271	B_Cell_cluster_Iglesia_CCR.2014_PMID.24916698	-1.34593
Immune_High_In_Response_MCP_TLS_Melanoma_PMID.31942075	-0.722256	Shehata2012_Stroma_PMID.25575446	-1.07272	TLS_tumors_w_TLS_and_CD8_v_CD8alone_PMID.31942071	-1.40118
GSEA_PD1_SIGNALING_REACTOME	-0.723105	MASC_Up_Nat.Med.2009_PMID.19648928	-1.07332	CIBERSORT_B_cells_memory_Nat.Methods.2015_PMID.25822800	-1.42183
PDGFRB_Single_Gene	-0.724355	TCGA_TGFB_score_21050467_Immunity.2018_PMID._29628290	-1.08495	EXTENDED_B_CELL_signatures_Garber_Cell.Mol.Gastroenterol.Hepatol.2017_PMID.28508029	-1.53704
CIBERSORT_Neutrophils_Nat.Methods.2015_PMID.25822800	-0.725523	Fibroblast_Cluster_BMC.Med.Genomics.2011_PMID.21214954	-1.09815	CIBERSORT_Plasma_cells_Nat.Methods.2015_PMID.25822800	-1.58832
B_Cell_cluster_Iglesia_CCR.2014_PMID.24916698	-0.733432	MDACC.FNA.2_J.Clin.Oncol.2010_PMID.20805453	-1.11331	Mouse_Human_ImmuneProfiles_SHAY_M_H_Induced_in_T_PNAS.2013_PMID.23382184_	-1.72545
Verhaak_Immune_Nat.Commun.2013_PMID.24113773	-0.737594	MM_Squamous.like_Genome.Biol.2013_PMID.24220145	-1.12503
CIBERSORT_Plasma_cells_Nat.Methods.2015_PMID.25822800	-0.738346	Lim.et.al.2010.Conserved.aMaSC_BCR.2010_PMID.20346151	-1.13864
Lim2010_MaSC_Adam_PMID.25575446	-0.739395	Murat_G07_J.Clin.Oncol.2008_PMID.18565887	-1.15322
CIBERSORT_B_cells_naive_Nat.Methods.2015_PMID.25822800	-0.739457	Scorr_EMAT2_Correlation_BCR.2020_PMID.32641077	-1.1645
Tcell_EXH_Effector_CD8_T_cell_at_day_8_p.i_Armstrong_vs_Naive_CD8_T_cell_Metagene_1_Science.2016_PMID.27789795	-0.741607	Lim2010_MaSC_Adam_PMID.25575446	-1.16554
Claudin_High_Genome.Biol.2007_PMID.17493263	-0.743417	Keller2012_CD10_Adam_PMID.25575446	-1.1969
B_lineage_MCP_PMID.31942075_PMID.31942077	-0.743518	MM_Class8_Genome.Biol.2013_PMID.24220145	-1.20848
Stromal_Signature_Nat.Med.2008_PMID.18438415	-0.745797	GSEA_GP4_MES_ECM.r.0.954_PerouLab_HS_Red7_BMC_Med_Genomics_2011_PMID.21214954	-1.213
DAN_ImmuneActive_Cell.2019_PMID.31730857	-0.747384	MBASAL_BMC.Med.Genomics.2011_PMID.21214954	-1.21358
Troester_Wound_Signature_Clin.Cancer.Res.2009_PMID.19887484	-0.7475	Fibromatosis_Lab.Invest.2008_PMID.18414401	-1.23087
Tcell_EXH_Exhausted_CD8_T_cell_vs_Naive_CD8_T_cell_Metagene_3_Science.2016_PMID.27789795	-0.748215	MET_DOWN_Significant_Genes_LOW_BASALS_1_Genes_JCI.2018_PMID.29480819	-1.23522
CD103_Positive_Cancer.Cell.2014_PMID.25446897	-0.749485	Troester_Wound_Signature_Clin.Cancer.Res.2009_PMID.19887484	-1.25318
IMMUNE_Bindea_Cell_T_cells_Immunity.2013_PMID.24138885	-0.749577	REPLICATION_STRESS_UP_SET_Cell.Rep.2018_PMID.29768207	-1.28538
CIBERSORT_T_cells_CD4_memory_resting_Nat.Methods.2015_PMID.25822800	-0.75366	REPLICATION_STRESS_POS_Cell.Rep.2018_PMID.29768207	-1.31049
CIBERSORT_NK_cells_activated_Nat.Methods.2015_PMID.25822800	-0.754322	Lums_HER2E_DOWN_metastatic.signature_JCI.2020_PMID.32573490	-1.46541
CD8_cluster_Iglesia_CCR.2014_PMID.24916698	-0.754749	TCGA.BRCA.1198_COLLAGEN11A_JCI.2020_PMID.32573490	-1.5129
T_RM_Cell_single_cell_signature_Savas_Nat_Med.2018_PMID.29942092	-0.755781
Immune_Suppression_Kardos_JCI.Insight.2016_PMID.27699256	-0.756776
IMMUNE_PEREZ_87_JCO.2015_PMID.2560586	-0.757358
CIBERSORT_NK_cells_resting_Nat.Methods.2015_PMID.25822800	-0.7583
CIBERSORT_T_cells_CD4_naive_Nat.Methods.2015_PMID.25822800	-0.761127
CIBERSORT_T_cells_CD4_memory_activated_Nat.Methods.2015_PMID.25822800	-0.76157
Miller_T_NK_Metagene_Genome_Biol_2013_PMID.23618380	-0.761593
GSEA_BIOCARTA_CTLA4_PATHWAY	-0.762775
MDSC_tumor_MO_Schlecker_J.Immunol.2012_PMID.23152559	-0.763103
MDSC_Neutrophil_Youn_J_Leukoc_Biol.2012_PMID.21954284	-0.765873
TCGA.BRCA.1198_immune_CD8_GZMK_JCI.2020_PMID.32573490	-0.76693
T_Cell_cluster_Iglesia_CCR.2014_PMID.24916698	-0.767921
CIBERSORT_T_cells_gamma_delta_Nat.Methods.2015_PMID.25822800	-0.770265
Stromal_Inflammation_J.Pathol.2017_PMID.27861902	-0.770317
TCGA_LIexpression_score_Immunity.2018_PMID._29628290	-0.772138
T.cells_MCP_PMID.31942075_PMID.31942077	-0.773746
MERCK_Immune_signature_Science.2018_PMID.30309915	-0.776938
MCD3_CD8_BMC.Med.Genomics.2011_PMID.21214954	-0.777286
CIBERSORT_T_cells_CD8_Nat.Methods.2015_PMID.25822800	-0.780488
Down_regulated_upon_N_RAS_repression_Cell_Rep.2015_PMID.26166574	-0.783218
LCK_Breast.Cancer.Research.2008_PMID.19272155	-0.783315
IMMUNE_Bindea_Cell_Neutrophils_Immunity.2013_PMID.24138885	-0.785631
CIBERSORT_T_cells_regulatory_Tregs_Nat.Methods.2015_PMID.25822800	-0.786377
IMMUNE_PEREZ_14_JCO.2015_PMID.2560586	-0.799796
TLS_tumors_w_TLS_and_CD8_v_CD8alone_PMID.31942071	-0.801834
CIBERSORT_T_cells_follicular_helper_Nat.Methods.2015_PMID.25822800	-0.803749
CIBERSORT_B_cells_memory_Nat.Methods.2015_PMID.25822800	-0.806948
Keller2012_CD10_Adam_PMID.25575446	-0.810272
CORE_B_CELL_signatures_Garber_Cell.Mol.Gastroenterol.Hepatol.2017_PMID.28508029	-0.845368
TCGA.BRCA.1198_COLLAGEN11A_JCI.2020_PMID.32573490	-0.852297
Cytotoxic_lymphocytes_MCP_PMID.31942075_PMID.31942077	-0.857181
TLS_Known_MARKERS_PMID.31942071	-0.868993
REPLICATION_STRESS_UP_SET_Cell.Rep.2018_PMID.29768207	-0.87969
GSEA_GP2_Immune_Tcell_Bcell.r.0.964_KEGG_HEMATOPOIETIC_CELL_LINEAGE	-0.89067
REPLICATION_STRESS_POS_Cell.Rep.2018_PMID.29768207	-0.898264
Mouse_Human_ImmuneProfiles_SHAY_M_H_Induced_in_NK_PNAS.2013_PMID.23382184_	-0.936988

## Sheet: Significant DGE mod AUR-RAP-GEI
AURORA-RAP-GEICAM_DGE modules_List_All subtypes_p.adj<0.01	AURORA-RAP-GEICAM_DGE modules_Beta-value_All subtypes_p.adj<0.01	AURORA-RAP-GEICAM_DGE modules_List_Lums-HER2E_p.adj<0.01	AURORA-RAP-GEICAM_DGE modules_Beta-value_Lums-HER2E_p.adj<0.01	AURORA-RAP-GEICAM_DGE modules_List_Basal_p.adj<0.01	AURORA-RAP-GEICAM_DGE modules_Beta-value_Basal_p.adj<0.01	AURORA-RAP-GEICAM_DGE modules_List_Brain_p.adj<0.01	AURORA-RAP-GEICAM_DGE modules_Beta-value_Brain_p.adj<0.01	AURORA-RAP-GEICAM_DGE modules_List_Brain-Basals_p.adj<0.01	AURORA-RAP-GEICAM_DGE modules_Beta-value_Brain-Basals_p.adj<0.01	AURORA-RAP-GEICAM_DGE modules_List_Liver_p.adj<0.01	AURORA-RAP-GEICAM_DGE modules_Beta-value_Liver_p.adj<0.01	AURORA-RAP-GEICAM_DGE modules_List_Liver-Lums-HER2E_p.adj<0.01	AURORA-RAP-GEICAM_DGE modules_Beta-value_Liver-Lums-HER2E_p.adj<0.01
Lums_HER2E_UP_metastatic.signature_JCI.2020_PMID.32573490	0.860047	Lums_HER2E_UP_metastatic.signature_JCI.2020_PMID.32573490	1.2381	MET_UP_RNA_Seq_Significant_Genes_JCI.2018_PMID.29480819	0.70031	IMMUNE_Bindea_Cell_Tgd_Immunity.2013_PMID.24138885	1.67647	GSEA_GP13_Neural_signailng.r.0.959_MODULE_100	2.39378	GSEA_RETINOL_METABOLISM_KEGG	1.50523	Lums_HER2E_UP_metastatic.signature_JCI.2020_PMID.32573490	1.59964
UNC_Scorr_Her2_Correlation_JCO.2009_PMID.19204204	0.563651	UNC_Scorr_Her2_Correlation_JCO.2009_PMID.19204204	0.725842	IMMUNE_Bindea_Cell_NK_CD56bright_cells_Immunity.2013_PMID.24138885	0.693632	TCGA_Tgd_cells_Immunity.2018_PMID._29628290	1.67647	IMMUNE_Bindea_Cell_Tgd_Immunity.2013_PMID.24138885	2.34068	Scorr_EMAT3_Correlation_BCR.2020_PMID.32641077	1.25119	GSEA_RETINOL_METABOLISM_KEGG	1.46481
Scorr_EMAT3_Correlation_BCR.2020_PMID.32641077	0.556697	Pcorr_IGS_Correlation_NJEM.2007_PMID.17229949	0.670199	Scorr_EMAT3_Correlation_BCR.2020_PMID.32641077	0.681147	TCGA.BRCA.1198_Chromogranin_JCI.2020_PMID.32573490	1.49232	TCGA_Tgd_cells_Immunity.2018_PMID._29628290	2.34068	GSEA_GP10_Fatty_acid_oxidation.r.0.930_CARBOXYLIC_ACID_METABOLIC_PROCESS	1.20563	GSEA_GP10_Fatty_acid_oxidation.r.0.930_CARBOXYLIC_ACID_METABOLIC_PROCESS	1.42701
Fibrinogen_Cluster_BMC.Med.Genomics.2011_PMID.21214954	0.54976	Pcorr_Breast2Lung_Parental_Correlation_Nature.2005_PMID.16049480	0.662406	Duke_Module14_p53_Mike_PMID.20335537	0.680005	Chromogramin_BMC.Med.Genomics.2011_PMID.21214954	1.38695	TCGA.BRCA.1198_Chromogranin_JCI.2020_PMID.32573490	2.13344	Pcorr_Breast2Lung_Parental_Correlation_Nature.2005_PMID.16049480	1.17397	Scorr_EMAT3_Correlation_BCR.2020_PMID.32641077	1.31356
FGFR4_Single_Gene	0.542486	Fibrinogen_Cluster_BMC.Med.Genomics.2011_PMID.21214954	0.593294	FGFR4_Repressed_JCI.2020_PMID.32573490	0.676556	Scorr_EMAT3_Correlation_BCR.2020_PMID.32641077	1.01842	GSEA_GP13_Neural_signailng.r.0.894_NERVOUS_SYSTEM_DEVELOPMENT	1.96161	Lums_HER2E_UP_metastatic.signature_JCI.2020_PMID.32573490	1.14773	Pcorr_Breast2Lung_Parental_Correlation_Nature.2005_PMID.16049480	1.28049
Pcorr_Breast2Lung_Parental_Correlation_Nature.2005_PMID.16049480	0.512918	GSEA_GP10_Fatty_acid_oxidation.r.0.930_CARBOXYLIC_ACID_METABOLIC_PROCESS	0.56952	Pcorr_Carcinoid_JMD.2013_PMID.23701907	0.659287	Pcorr_Dasatinib_L_Correlation_Cancer.Res.2007_PMID.17332353	0.889194	Chromogramin_BMC.Med.Genomics.2011_PMID.21214954	1.9399	TCGA.BRCA.1198_NORMAL2_JCI.2020_PMID.32573490	1.0137	Euclidean_Distance_2_CLOW_Euclidean.Distance_BCR.2010_PMID.20813035	1.08011
Pcorr_IGS_Correlation_NJEM.2007_PMID.17229949	0.497575	MITO1_BMC.Med.Genomics.2011_PMID.21214954	0.564664	Pcorr_magnoid_PLOS.2012_PMID.22590557	0.622925	IMMUNE_Bindea_Cell_NK_CD56bright_cells_Immunity.2013_PMID.24138885	0.841787	Wahl_fMasC_Signature_Cell.Stem.Cell.2012_PMID.22305568	1.46286	UNC_Differentiation.Score_Model_BCR.2010_PMID.20813035	0.955268	UNC_Scorr_Her2_Correlation_JCO.2009_PMID.19204204	1.07747
GSEA_GP10_Fatty_acid_oxidation.r.0.930_CARBOXYLIC_ACID_METABOLIC_PROCESS	0.398386	FGFR4_Single_Gene	0.541581	GSEA_GP21_Anti_apoptosis_DNA_stability.r.0.925_MORF_MT4	0.582037	Duke_Module14_p53_Mike_PMID.20335537	0.612467	IMMUNE_Bindea_Cell_NK_CD56bright_cells_Immunity.2013_PMID.24138885	1.15827	Euclidean_Distance_2_CLOW_Euclidean.Distance_BCR.2010_PMID.20813035	0.945667	UNC_Differentiation.Score_Model_BCR.2010_PMID.20813035	1.07704
UNC_Proliferation_11_Mean_JCO.2009_PMID.19204204	0.394214	Scorr_EMAT3_Correlation_BCR.2020_PMID.32641077	0.535637	Stromal_Central_Fibrotic_Focus_J.Pathol.2017_PMID.27861902	0.574914	UNC_Differentiation.Score_Model_BCR.2010_PMID.20813035	0.500919	Pcorr_Dasatinib_L_Correlation_Cancer.Res.2007_PMID.17332353	1.11099	UNC_Scorr_Her2_Correlation_JCO.2009_PMID.19204204	0.909352	UNC_Scorr_LumB_Correlation_JCO.2009_PMID.19204204	0.951767
GSEA_GP5_MYC_targets_TERT.r.0.922_PerouLab_MM_Myc_1pFDR_UP_Genome_Biology_2007_PMID.17493263	0.376925	UNC_Proliferation_11_Mean_JCO.2009_PMID.19204204	0.50657	FGFR4_Single_Gene	0.573679	LumB_Basal_JCI.2020_PMID.32573490	-0.385242	Scorr_EMAT3_Correlation_BCR.2020_PMID.32641077	1.10464	Neutrophils_MCP_PMID.31942075_PMID.31942077	0.895255	TCGA.BRCA.1198_NORMAL2_JCI.2020_PMID.32573490	0.902231
UNC_Scorr_LumB_Correlation_JCO.2009_PMID.19204204	0.376911	UNC_ROR_S_Model_JCO.2009_PMID.19204204	0.498384	Pcorr_Dasatinib_L_Correlation_Cancer.Res.2007_PMID.17332353	0.567097	Scorr_EMAT4_Correlation_BCR.2020_PMID.32641077	-0.510268	Scorr_IE_Correlation_JCO.2006_PMID.16505416	0.949757	Mmyosin_BMC.Med.Genomics.2011_PMID.21214954	0.802841	MASC_Down_Nat.Med.2009_PMID.19648928	0.900716
MITO1_BMC.Med.Genomics.2011_PMID.21214954	0.370522	GSEA_GP5_MYC_targets_TERT.r.0.922_PerouLab_MM_Myc_1pFDR_UP_Genome_Biology_2007_PMID.17493263	0.495747	Scorr_IE_Correlation_JCO.2006_PMID.16505416	0.517323	LumProg_HsEnriched_Refined1_BCR.2015_PMID.25575446	-0.576296	Pcorr_NKI70_Good_Correlation_Nature.2002_PMID.11823860	0.904235	UNC_Scorr_LumB_Correlation_JCO.2009_PMID.19204204	0.791079	GSEA_GP5_MYC_targets_TERT.r.0.922_PerouLab_MM_Myc_1pFDR_UP_Genome_Biology_2007_PMID.17493263	0.861236
LumA_LumB_JCI.2020_PMID.32573490	0.368201	LumA_LumB_JCI.2020_PMID.32573490	0.481527	Pcorr_primitive_CCR.2010_PMID.20643781	0.515537	GSEA_GP17_Basal_signaling.r.0.958_SMID_BREAST_CANCER_BASAL_UP	-0.602546	Duke_Module14_p53_Mike_PMID.20335537	0.858077	Pcorr_secretory_CCR.2010_PMID.20643781	0.749761	Pcorr_secretory_CCR.2010_PMID.20643781	0.858951
UNC_ROR_S_Model_JCO.2009_PMID.19204204	0.367768	UNC_Scorr_LumB_Correlation_JCO.2009_PMID.19204204	0.468608	TCGA.BRCA.1198_LUMINAL_JCI.2020_PMID.32573490	0.459769	Lim.et.al.2010.Conserved.Luminal.Progenitor_BCR.2010_PMID.20346151	-0.615865	TCGA.BRCA.1198_LUMINAL_JCI.2020_PMID.32573490	0.772078	Pcorr_magnoid_PLOS.2012_PMID.22590557	0.73104	MM_Myc.2012_Genome.Biol.2013_PMID.24220145	0.855199
Euclidean_Distance_2_CLOW_Euclidean.Distance_BCR.2010_PMID.20813035	0.360456	fMaSC_Metab8_CellRep.2018_PMID.30089273	0.457123	Shehata2012_NCL_PMID.25575446	0.434171	Stingl_Up_Basal_High_Nat.Cell.Biol.2014_PMID.25173976	-0.616298	Pcorr_primitive_CCR.2010_PMID.20643781	0.754214	FGFR4_Single_Gene	0.727	X16.13_Amplicon_BMC.Med.Genomics.2011_PMID.21214954	0.843554
Excellent_Pathologic_Response_ER.Pos_39_JAMA.2011_PMID.21558518	0.343576	MNADH_CYTochrome_BMC.Med.Genomics.2011_PMID.21214954	0.447829	MCF7.E2.repressed.genes_JCO.2006_PMID.16505416	0.427205	Pfefferle2012_LumProg_PMID.25575446	-0.641341	UNC_Differentiation.Score_Model_BCR.2010_PMID.20813035	0.718998	X16.13_Amplicon_BMC.Med.Genomics.2011_PMID.21214954	0.720165	MITO1_BMC.Med.Genomics.2011_PMID.21214954	0.79539
Pcorr_magnoid_PLOS.2012_PMID.22590557	0.328568	MASC_Down_Nat.Med.2009_PMID.19648928	0.435468	LUMINAL_Cluster_BMC.Med.Genomics.2011_PMID.21214954	0.402752	JANES_Oscillation_GDF11_TGFBR3_Nat.Cell.Biol.2014_PMID.24658685	-0.697267	Lim2009_MatureLum_Adam_PMID.25575446	0.679455	MET_UP_RNA_Seq_Significant_Genes_JCI.2018_PMID.29480819	0.711012	Lymphovascular_Invasion_J.Pathol.2017_PMID.27861902	0.789284
MM_NeuPyMT_1pFDR_UP_Genome.Biology.2007_PMID.17493263	0.32353	GSEA_GP18_Vesicle_EPR_membrane_coat.r.0.877_MEMBRANE_COAT	0.418507	Duke_Module06_er_Mike_PMID.20335537	0.39193	Shipitsin_CD44_A_Cancer.Cell.2007_PMID.17349583	-0.72168	Lim.et.al.2010.Conserved.Mature_BCR.2010_PMID.20346151	0.632273	Lymphovascular_Invasion_J.Pathol.2017_PMID.27861902	0.706959	Excellent_Pathologic_Response_ER.Pos_39_JAMA.2011_PMID.21558518	0.783802
GSEA_GP20_TAL1_Leukemia_erythropoiesis.r.0.935_GNF2_TAL1	0.319632	LumProg_Shehata_BCR.2015_PMID.25575446	0.411725	MatureLum_Lim09_BCR.2015_PMID.25575446	0.39179	Luminal_Progenitor_Up_Nat.Med.2009_PMID.19648928	-0.724225	Her2_Basal_JCI.2020_PMID.32573490	-0.348519	TCGA.BRCA.1198_FGFR4_EGF_JCI.2020_PMID.32573490	0.693591	Pcorr_IGS_Correlation_NJEM.2007_PMID.17229949	0.753974
MASC_Down_Nat.Med.2009_PMID.19648928	0.31928	MM_NeuPyMT_1pFDR_UP_Genome.Biology.2007_PMID.17493263	0.408765	Lim2009_MatureLum_Adam_PMID.25575446	0.387363	Influenza_11genes_Metasignature_KHATRI_Immunity.2015_PMID.26682989	-0.773665	GATA3.induced.genes_JCO.2006_PMID.16505416	-0.618492	Pcorr_primitive_CCR.2010_PMID.20643781	0.67837	MatureLum_Shehata_BCR.2015_PMID.25575446	0.741469
MatureLum_Shehata_BCR.2015_PMID.25575446	0.316478	Apocrine_Features_J.Pathol.2017_PMID.27861902	0.402221	Pcorr_NKI70_Good_Correlation_Nature.2002_PMID.11823860	0.384702	LumProg_HsEnriched_BCR.2015_PMID.25575446	-0.783807	XRT_inducedgenes_Oh_PMID.24527691	-0.653327	Excellent_Pathologic_Response_ER.Pos_39_JAMA.2011_PMID.21558518	0.627055	GSEA_GP9_Cell_cell_adhesion.r.960_PerouLab_MClaudin_Cluster_BMC_Med_Genomics_2011_PMID.21214954	0.720965
Pcorr_primitive_CCR.2010_PMID.20643781	0.315043	GSEA_GP20_TAL1_Leukemia_erythropoiesis.r.0.935_GNF2_TAL1	0.3984	UNC_Differentiation.Score_Model_BCR.2010_PMID.20813035	0.376769	Mature_Luminal_Down_Nat.Med.2009_PMID.19648928	-0.799596	Mature_Luminal_Down_Nat.Med.2009_PMID.19648928	-0.664306	GSEA_GP9_Cell_cell_adhesion.r.960_PerouLab_MClaudin_Cluster_BMC_Med_Genomics_2011_PMID.21214954	0.584675	X3p21Amplicon_BMC.Med.Genomics.2011_PMID.21214954	0.707613
MM_Myc.2012_Genome.Biol.2013_PMID.24220145	0.310578	Knudsen_Neo_ER_negative_Clin.Cancer.Res.2014_PMID.25047707	0.396185	GSEA_GP7_Estrogen_signaling.r.0.97_SMID_BREAST_CANCER_BASAL_DN	0.337116	Spike2012_aMaSC_PMID.25575446	-0.826405	LumB_Basal_JCI.2020_PMID.32573490	-0.664818	LumB_Basal_JCI.2020_PMID.32573490	-0.458982	Pcorr_primitive_CCR.2010_PMID.20643781	0.701746
GSEA_GP1_Proliferation_DNA_repair.r.0.972_REACTOME_CELL_CYCLE_MITOTIC	0.309064	MM_Myc.2012_Genome.Biol.2013_PMID.24220145	0.395418	MatureLum_HsEnriched_BCR.2015_PMID.25575446	0.305288	IMMUNE_Bindea_Cell_Mast_cells_Immunity.2013_PMID.24138885	-0.827759	T_regulatory_cell_2gene_PMID.31942077	-0.684815	Pcorr_Squamous_Cell_Carcinoma_JMD.2013_PMID.23701907	-0.501885	Claudin_Low_29_Cancer.Res.2009_PMID.19435916	0.665304
MNADH_CYTochrome_BMC.Med.Genomics.2011_PMID.21214954	0.308806	MITO2_BMC.Med.Genomics.2011_PMID.21214954	0.393905	Pfefferle2012_MatureLum_PMID.25575446	0.301385	METAPLASTIC_Up_CanRes.2009_PMID.19435916	-0.831964	GSEA_GP17_Basal_signaling.r.0.958_SMID_BREAST_CANCER_BASAL_UP	-0.688154	Stingl_Up_Basal_High_Nat.Cell.Biol.2014_PMID.25173976	-0.50325	GATA3.induced.genes_JCO.2006_PMID.16505416	0.645522
X16.13_Amplicon_BMC.Med.Genomics.2011_PMID.21214954	0.304005	Excellent_Pathologic_Response_ER.Pos_39_JAMA.2011_PMID.21558518	0.392792	MatureLum_HsEnriched_Refined1_BCR.2015_PMID.25575446	0.275272	MHC.I_Breast.Cancer.Research.2008_PMID.19272155	-0.836965	Scorr_EMAT4_Correlation_BCR.2020_PMID.32641077	-0.68944	LumProg_HsEnriched_Refined1_BCR.2015_PMID.25575446	-0.504269	Her2_Basal_JCI.2020_PMID.32573490	-0.554283
MET_UP_RNA_Seq_Significant_Genes_JCI.2018_PMID.29480819	0.303005	GSEA_GP1_Proliferation_DNA_repair.r.0.972_REACTOME_CELL_CYCLE_MITOTIC	0.389961	Chemo_Endocrine_Score_CC_.2.LumA_subtract.by_CC.2.Basal_Clin.Cancer.Res.2017_PMID.27903675	0.171016	Duke_Module10_ifna_Mike_PMID.20335537	-0.838299	TCGA.BRCA.1198_EN1_FDZ9_JCI.2020_PMID.32573490	-0.697517	Her2_Basal_JCI.2020_PMID.32573490	-0.515695	Taube_EMT_up_PNAS.2010_PMID.20713713	-0.60244
GSEA_GP18_Vesicle_EPR_membrane_coat.r.0.877_MEMBRANE_COAT	0.294965	Duke_Module02_akt_Mike_PMID.20335537	0.382558	UNC_Scorr_Basal_Correlation_JCO.2009_PMID.19204204	-0.171016	MM_Erbb2.like_Genome.Biol.2013_PMID.24220145	-0.843796	LumA_Basal_JCI.2020_PMID.32573490	-0.698182	MSquamous_BMC.Med.Genomics.2011_PMID.21214954	-0.518223	Wahl_fMasC_Signature_Cell.Stem.Cell.2012_PMID.22305568	-0.646063
UNC_Differentiation.Score_Model_BCR.2010_PMID.20813035	0.293828	Scorr_S329_R_Correlation_Br.J.Cancer.2008_PMID.18382427	0.378944	BASAL_Cluster_BMC.Med.Genomics.2011_PMID.21214954	-0.287856	GSEA_GP11_Immune_IFN.r.0.965_PerouLab_MInterferon_Cluster_BMC_Med_Genomics_2011_PMID.21214954	-0.84552	GSEA_GP20_TAL1_Leukemia_erythropoiesis.r.0.935_GNF2_TAL1	-0.738385	Wahl_fMasC_Signature_Cell.Stem.Cell.2012_PMID.22305568	-0.555678	Luminal_Progenitor_Down_Nat.Med.2009_PMID.19648928	-0.701474
Scorr_S329_R_Correlation_Br.J.Cancer.2008_PMID.18382427	0.293317	JANES_Oscillation_JUND_KRT5_Nat.Cell.Biol.2014_PMID.24658685	0.375404	Her2_Basal_JCI.2020_PMID.32573490	-0.300178	aMaSC_Prat_BCR.2015_PMID.25575446	-0.875229	LumB_Her2_JCI.2020_PMID.32573490	-0.751382	TCGA.BRCA.1198_immune_CD19_JCI.2020_PMID.32573490	-0.573178	GSEA_GP8_FOXO_stemness.r.0.931_TTGTTT_V.FOXO4_01	-0.724844
X17PP13_Amplicon_BMC.Med.Genomics.2011_PMID.21214954	0.289214	fMaSC_Metab_CellRep.2018_PMID.30089273	0.372071	TCGA.BRCA.1198_BASAL_JCI.2020_PMID.32573490	-0.328544	aStr_Lim09_BCR.2015_PMID.25575446	-0.90572	GSEA_GP15_EGF_signailng.r.0.936_NAGASHIMA_EGF_SIGNALING_UP	-0.808479	GSEA_GP17_Basal_signaling.r.0.958_SMID_BREAST_CANCER_BASAL_UP	-0.58343	PR_Isoform_Ratio_Up_in_PRA_H_JNCI.2017_PMID.28376177	-0.762058
LumProg_Shehata_BCR.2015_PMID.25575446	0.282933	Inflammatory_Breast_Cancer_79_IBC_CCR.2013_PMID.23396049	0.371083	TCGA.BRCA.1198_EN1_FDZ9_JCI.2020_PMID.32573490	-0.337273	Cytotoxic_lymphocytes_MCP_PMID.31942075_PMID.31942077	-0.905886	LumA_Her2_JCI.2020_PMID.32573490	-0.814927	CORE_B_CELL_signatures_Garber_Cell.Mol.Gastroenterol.Hepatol.2017_PMID.28508029	-0.591473	fMaSC.refined1_PMID.25575446	-0.770366
Melanoma_Scorr_Keratin_Cell.2015_PMID.26091043	0.282221	MNB1_BMC.Med.Genomics.2011_PMID.21214954	0.370119	fMaSC.refined1_PMID.25575446	-0.348458	Shehata2012_ALDHpos_PMID.25575446	-0.908361	X16q23_Amplicon_BMC.Med.Genomics.2011_PMID.21214954	-0.81498	B_lineage_MCP_PMID.31942075_PMID.31942077	-0.604939	GSEA_GP13_Neural_signailng.r.0.959_MODULE_100	-0.796354
GSEA_BIOCARTA_BRCA_ATR_PATHWAY_ATRBRCA	0.282133	X17PP13_Amplicon_BMC.Med.Genomics.2011_PMID.21214954	0.367515	Mature_Luminal_Down_Nat.Med.2009_PMID.19648928	-0.385484	Troester_Wound_Signature_Clin.Cancer.Res.2009_PMID.19887484	-0.913045	Luminal_Progenitor_Up_Nat.Med.2009_PMID.19648928	-0.877985	GO_UP_with_SOX10_OE_Cell.Rep.2015_PMID.26365194	-0.633785	Keller2012_CD10_Adam_PMID.25575446	-0.824749
fMaSC_Metab8_CellRep.2018_PMID.30089273	0.27428	LumA_Her2_JCI.2020_PMID.32573490	0.367284	XRT_inducedgenes_Oh_PMID.24527691	-0.394683	Stromal_Up_Nat.Med.2009_PMID.19648928	-0.914428	Shehata2012_ALDHpos_PMID.25575446	-0.910243	Myeloid_dendritic_cells_MCP_PMID.31942075_PMID.31942077	-0.639124	MFGFR2_BMC.Med.Genomics.2011_PMID.21214954	-0.872818
Extensive_Residual_Diesase_ER.Pos_73_JAMA.2011_PMID.21558518	0.272938	fMaSC_Signature_CellRep.2018_PMID.30089273	0.361646	LumA_Basal_JCI.2020_PMID.32573490	-0.411419	Pcorr_Dasatinib_R_Correlation_Cancer.Res.2007_PMID.17332353	-0.920415	MM_Squamous.like_Genome.Biol.2013_PMID.24220145	-0.935339	aMaSC_Shehata_BCR.2015_PMID.25575446	-0.64015	MS_CD44_UP_PNAS.2009_PMID.19666588	-0.898138
ACTIVATED_LUNG_NEUTROPHIL_SIGNATURE_Nat.Cell.Biol.2019_PMID.31263265	0.27139	ACTIVATED_LUNG_NEUTROPHIL_SIGNATURE_Nat.Cell.Biol.2019_PMID.31263265	0.359175	LumA_Her2_JCI.2020_PMID.32573490	-0.412187	Mouse_Human_ImmuneProfiles_SHAY_M_H_Induced_in_T_PNAS.2013_PMID.23382184_	-0.924762	aStr_Prat_BCR.2015_PMID.25575446	-0.948073	GSEA_GP8_FOXO_stemness.r.0.931_TTGTTT_V.FOXO4_01	-0.647794	PDGFRB_Single_Gene	-0.924373
X19p13_Amplicon_BMC.Med.Genomics.2011_PMID.21214954	0.270174	Pcorr_secretory_CCR.2010_PMID.20643781	0.359097	Stingl_Up_Basal_High_Nat.Cell.Biol.2014_PMID.25173976	-0.435216	Durvalumab_signature_Higgs_Clin.Cancer.Res.2018_PMID.29716923	-0.950517	CIBERSORT_Mast_cells_activated_Nat.Methods.2015_PMID.25822800	-0.953292	Keller2012_CD10_Adam_PMID.25575446	-0.661268	TCGA.BRCA.1198_UNKNOWN2_JCI.2020_PMID.32573490	-0.929139
X3p21Amplicon_BMC.Med.Genomics.2011_PMID.21214954	0.267824	Euclidean_Distance_2_CLOW_Euclidean.Distance_BCR.2010_PMID.20813035	0.35165	GSEA_GP17_Basal_signaling.r.0.958_SMID_BREAST_CANCER_BASAL_UP	-0.436112	HRneg.Tneg_14.Genes_BCR.2010_PMID.20946665	-0.953908	Influenza_11genes_Metasignature_KHATRI_Immunity.2015_PMID.26682989	-0.968974	Taube_EMT_up_PNAS.2010_PMID.20713713	-0.661908	GSEA_GP15_EGF_signailng.r.0.936_NAGASHIMA_EGF_SIGNALING_UP	-0.929233
GHI_RS_Model_NJEM.2004_PMID.15591335	0.266656	GSEA_GP1_Proliferation_DNA_repair.r.0.981_PUJANA_CHEK2_PCC_NETWORK	0.346474	Lim2009_LumProg_Adam_PMID.25575446	-0.436873	TCGA.BRCA.1198_immune_HLA_A_F_JCI.2020_PMID.32573490	-0.961584	REPLICATION_STRESS_DOWN_SET_Cell.Rep.2018_PMID.29768207	-0.971676	Luminal_Progenitor_Down_Nat.Med.2009_PMID.19648928	-0.673245	TCGA.BRCA.1198_NORMAL_JCI.2020_PMID.32573490	-0.929488
X5Q_Breast.Cancer.Res.Treat.2012_PMID.22048815	0.261264	TCGA_CHANG_CORE_SERUM_RESPONSE_UP_Immunity.2018_PMID._29628290	0.34629	LumB_Basal_JCI.2020_PMID.32573490	-0.445236	TLS_Hallmark_Gene_Signature_PMID.31942071	-0.970019	LumProg_HsEnriched_BCR.2015_PMID.25575446	-0.991829	aMaSC_Prat_BCR.2015_PMID.25575446	-0.680696	Spike2012_fStr_PMID.25575446	-0.933936
MITO2_BMC.Med.Genomics.2011_PMID.21214954	0.259717	Extensive_Residual_Diesase_ER.Pos_73_JAMA.2011_PMID.21558518	0.345245	T_regulatory_cell_2gene_PMID.31942077	-0.46973	TLS_New_9Gene_Signature_PMID.31942071	-0.973747	Wahl_fSTR_Signature_Cell.Stem.Cell.2012_PMID.22305568	-0.992105	fMaSC.refined1_PMID.25575446	-0.70042	Lobular_Carcinoma_In_Situ_J.Pathol.2017_PMID.27861902	-0.935133
TCGA.BRCA.1198_FGFR4_EGF_JCI.2020_PMID.32573490	0.25892	Stingl_Day7_Upregulated_Nat.Cell.Biol.2014_PMID.25173976	0.342465	LumB_Her2_JCI.2020_PMID.32573490	-0.471971	CD68_cluster_Iglesia_CCR.2014_PMID.24916698	-0.973988	CIBERSORT_Plasma_cells_Nat.Methods.2015_PMID.25822800	-1.00026	GSEA_GP13_Neural_signailng.r.0.959_MODULE_100	-0.7091	IMMUNE_Bindea_Cell_Th1_cells_Immunity.2013_PMID.24138885	-0.971529
Lymphovascular_Invasion_J.Pathol.2017_PMID.27861902	0.257789	X19p13_Amplicon_BMC.Med.Genomics.2011_PMID.21214954	0.339905	IMS_Score_Clin.Cancer.Res.2018_PMID.29921729	-0.493113	REPLICATION_STRESS_DOWN_SET_Cell.Rep.2018_PMID.29768207	-1.00018	Duke_Module10_ifna_Mike_PMID.20335537	-1.02301	CIBERSORT_Mast_cells_activated_Nat.Methods.2015_PMID.25822800	-0.71122	IMMUNE_Bindea_Cell_Normal_mucosa_Immunity.2013_PMID.24138885	-0.975368
Duke_Module14_p53_Mike_PMID.20335537	0.254295	Duke_Module03_betacatenin_Mike_PMID.20335537	0.339138	S100A9_A8_BMC.Med.Genomics.2011_PMID.21214954	-0.495181	EXTENDED_B_CELL_signatures_Garber_Cell.Mol.Gastroenterol.Hepatol.2017_PMID.28508029	-1.00913	Scorr_IIE_Correlation_JCO.2006_PMID.16505416	-1.05359	Early_IRS_2_PLoS.One.2016_PMID.26991655	-0.724164	Scorr_EMAT1_Correlation_BCR.2020_PMID.32641077	-0.982908
HRAS_Single_Gene	0.252232	Duke_Module13_myc_Mike_PMID.20335537	0.338955	MM_Stat1_Genome.Biol.2013_PMID.24220145	-0.499107	Duke_Module22_tnfa_Mike_PMID.20335537	-1.01327	GSEA_GP6_Squamous_differentiation_development.r.0.902_RICKMAN_TUMOR_DIFFERENTIATED_WELL_VS_POORLY_DN	-1.05803	FOXC1_Hair_Follicles_Wang_SCIENCE.2016_P30C.LO.vs.WT_Negative_PMID.26912704	-0.730195	TCGA.BRCA.1198_BASAL_JCI.2020_PMID.32573490	-0.985545
Pcorr_Dasatinib_L_Correlation_Cancer.Res.2007_PMID.17332353	0.248685	GSEA_BIOCARTA_BRCA_ATR_PATHWAY_ATRBRCA	0.338531	MM_Erbb2.like_Genome.Biol.2013_PMID.24220145	-0.502427	MM_Class8_Genome.Biol.2013_PMID.24220145	-1.02146	CIBERSORT_Neutrophils_Nat.Methods.2015_PMID.25822800	-1.06348	MS_CD44_UP_PNAS.2009_PMID.19666588	-0.734001	IMMUNE_Bindea_Cell_Mast_cells_Immunity.2013_PMID.24138885	-0.985581
MCF7.E2.repressed.genes_JCO.2006_PMID.16505416	0.244481	GHI_RS_Model_NJEM.2004_PMID.15591335	0.337475	TCGA.BRCA.1198_UNKNOWN2_JCI.2020_PMID.32573490	-0.510541	CIBERSORT_B_cells_naive_Nat.Methods.2015_PMID.25822800	-1.03099	TNBC_Clinically_Relevant_Good.230_BCR.2011_PMID.21978456	-1.0649	Lobular_Carcinoma_In_Situ_J.Pathol.2017_PMID.27861902	-0.755927	Pfefferle2012_MaSC_PMID.25575446	-0.985673
X17q25x_BMC.Med.Genomics.2011_PMID.21214954	0.229524	PARP_sensitivity_MDACC_NPJ.Syst.Biol.Appl._2017_PMID.28649435	0.336645	MET_DOWN_Significant_Genes_LOW_BASALS_1_Genes_JCI.2018_PMID.29480819	-0.514078	Wahl_fSTR_Signature_Cell.Stem.Cell.2012_PMID.22305568	-1.0382	REPLICATION_STRESS_NEG_Cell.Rep.2018_PMID.29768207	-1.06827	Spike2012_fStr_PMID.25575446	-0.757671	Stingl_Down_Basal_High_Nat.Cell.Biol.2014_PMID.25173976	-0.989457
LumA_Her2_JCI.2020_PMID.32573490	0.198179	Mouse_Human_ImmuneProfiles_SHAY_M_H_Induced_in_HSC_PNAS.2013_PMID.23382184_	0.332207	LumProg_HsEnriched_Refined1_BCR.2015_PMID.25575446	-0.52356	TCGA.BRCA.1198_immune_CD4_CD53_CD84_BTK_JCI.2020_PMID.32573490	-1.04134	aMaSC_Prat_BCR.2015_PMID.25575446	-1.07305	TCGA.BRCA.1198_NORMAL_JCI.2020_PMID.32573490	-0.765141	REPLICATION_STRESS_MODEL_Cell.Rep.2018_PMID.29768207	-0.990404
Duke_Module06_er_Mike_PMID.20335537	0.196096	X16q23_Amplicon_BMC.Med.Genomics.2011_PMID.21214954	0.330573	Scorr_EMAT4_Correlation_BCR.2020_PMID.32641077	-0.540389	MYC_Single_Gene	-1.04551	GSEA_GP11_Immune_IFN.r.0.965_PerouLab_MInterferon_Cluster_BMC_Med_Genomics_2011_PMID.21214954	-1.08704	PR_Isoform_Ratio_Up_in_PRA_H_JNCI.2017_PMID.28376177	-0.776903	Bcells_Naive_J.Clin.Oncol.2015_PMID.25800755	-1.017
LumB_Basal_JCI.2020_PMID.32573490	-0.141759	GSEA_BIOCARTA_RAS_PATHWAY	0.327835	Interferon_Breast.Cancer.Research.2008_PMID.19272155	-0.543137	IMMUNE_Bindea_Cell_Cytotoxic_cells_Immunity.2013_PMID.24138885	-1.04733	aStr_Shehata_BCR.2015_PMID.25575446	-1.09391	Stingl_Down_CLOW_High_Nat.Cell.Biol.2014_PMID.25173976	-0.783967	TCGA.BRCA.1198_immune_FOS_JUN_IL6_JCI.2020_PMID.32573490	-1.0203
Her2_Basal_JCI.2020_PMID.32573490	-0.188303	ACTIVATED_BLOOD_NEUTROPHIL_SIGNATURE_Nat.Cell.Biol.2019_PMID.31263265	0.321111	MM_Squamous.like_Genome.Biol.2013_PMID.24220145	-0.545259	Tcell_EXH_Anti_PDL1_vs_control_treated_exhausted_CD8_T_cell_Metagene_1_Science.2016_PMID.27789795	-1.05129	MM_Normal.like_Genome.Biol.2013_PMID.24220145	-1.09987	Bcell_IL10_PLUS_LIN_J_Immunol.2014_PMID.25080484	-0.784268	High_In_No_Response_MCP_TLS_Melanoma_PMID.31942075	-1.02223
ADM_S100A10_A110NDGR1_Cluster_BMC.Med.Genomics.2011_PMID.21214954	-0.208756	Shipitsin_CD44_B_Cancer.Cell.2007_PMID.17349583	0.318439	Luminal_Progenitor_Up_Nat.Med.2009_PMID.19648928	-0.557104	PDGFRA_Single_Gene	-1.05304	MYC_Single_Gene	-1.10783	CIBERSORT_Mast_cells_resting_Nat.Methods.2015_PMID.25822800	-0.792575	FOS_JUN_Cluster_BMC.Med.Genomics.2011_PMID.21214954	-1.02454
GSEA_GP17_Basal_signaling.r.0.958_SMID_BREAST_CANCER_BASAL_UP	-0.209699	GATA3.induced.genes_JCO.2006_PMID.16505416	0.31542	MM_Claudinlow_Genome.Biol.2013_PMID.24220145	-0.558706	CIBERSORT_B_cells_memory_Nat.Methods.2015_PMID.25822800	-1.05352	aStr_HsEnriched_BCR.2015_PMID.25575446	-1.1176	GO_DOWN_with_SOX10_OE_Cell.Rep.2015_PMID.26365194	-0.801296	REPLICATION_STRESS_UP_SET_Cell.Rep.2018_PMID.29768207	-1.03095
UNC_Scorr_LumA_Correlation_JCO.2009_PMID.19204204	-0.226844	GSEA_MTOR_PATHWAY_BIOCARTA	0.315239	Scorr_IIE_Correlation_JCO.2006_PMID.16505416	-0.559719	CORE_B_CELL_signatures_Garber_Cell.Mol.Gastroenterol.Hepatol.2017_PMID.28508029	-1.05489	Cytotoxic_lymphocytes_MCP_PMID.31942075_PMID.31942077	-1.11858	MDSC_Neutrophil_Youn_J_Leukoc_Biol.2012_PMID.21954284	-0.803313	MM_Class8_Genome.Biol.2013_PMID.24220145	-1.05015
Lim.et.al.2010.Conserved.Luminal.Progenitor_BCR.2010_PMID.20346151	-0.255591	UNC_Differentiation.Score_Model_BCR.2010_PMID.20813035	0.308364	MDSC_tumor_Schlecker_J.Immunol.2012_PMID.23152559	-0.560319	MProtocadherin_BMC.Med.Genomics.2011_PMID.21214954	-1.05502	Durvalumab_signature_Higgs_Clin.Cancer.Res.2018_PMID.29716923	-1.12445	REPLICATION_STRESS_MODEL_Cell.Rep.2018_PMID.29768207	-0.806893	Verhaak_Stromal_Nat.Commun.2013_PMID.24113773	-1.05309
MYC_Single_Gene	-0.26159	MatureLum_Shehata_BCR.2015_PMID.25575446	0.307891	TCGA.BRCA.1198_COLLAGEN11A_JCI.2020_PMID.32573490	-0.578554	Miller_T_NK_Metagene_Genome_Biol_2013_PMID.23618380	-1.06035	TCGA.BRCA.1198_UNKNOWN2_JCI.2020_PMID.32573490	-1.13069	Stromal_Signature_Nat.Med.2008_PMID.18438415	-0.81798	REPLICATION_STRESS_POS_Cell.Rep.2018_PMID.29768207	-1.06369
CD274_Single_Gene	-0.272716	Scorr_IIE_Correlation_JCO.2006_PMID.16505416	0.306131	Pcorr_Dasatinib_R_Correlation_Cancer.Res.2007_PMID.17332353	-0.581453	MM_Normal.like_Genome.Biol.2013_PMID.24220145	-1.0637	Pcorr_Dasatinib_R_Correlation_Cancer.Res.2007_PMID.17332353	-1.14412	aMaSC_HsEnriched_Refined1_BCR.2015_PMID.25575446	-0.821073	BASAL_Cluster_BMC.Med.Genomics.2011_PMID.21214954	-1.08072
Wahl_fMasC_Signature_Cell.Stem.Cell.2012_PMID.22305568	-0.27685	X3p21Amplicon_BMC.Med.Genomics.2011_PMID.21214954	0.304356	Duke_Module18_ras_Mike_PMID.20335537	-0.583711	Immunosuppression_PMID.31942077	-1.06463	Bcells_Centrocyte_J.Clin.Oncol.2015_PMID.25800755	-1.16856	FOS_JUN_Cluster_BMC.Med.Genomics.2011_PMID.21214954	-0.822893	MM_p53null.Basal_Genome.Biol.2013_PMID.24220145	-1.08296
Shehata2012_ALDHpos_PMID.25575446	-0.277273	X8p_Amplicon_BMC.Med.Genomics.2011_PMID.21214954	0.304226	CIBERSORT_Mast_cells_activated_Nat.Methods.2015_PMID.25822800	-0.595547	CIBERSORT_Neutrophils_Nat.Methods.2015_PMID.25822800	-1.06602	Melanoma_Scorr_Immune_Cell.2015_PMID.26091043	-1.17196	TCGA.BRCA.1198_immune_FOS_JUN_IL6_JCI.2020_PMID.32573490	-0.825309	Stingl_Day7_Downregulated_Nat.Cell.Biol.2014_PMID.25173976	-1.08618
Tcell_EXH_Memory_CD8_T_cell_a_vs_Naive_CD8_T_cell_Metagene_2_Science.2016_PMID.27789795	-0.279478	HER1_Cluster3_BMC.Genomics.2007_PMID.17663798	0.300817	IMMUNE_Bindea_Cell_TReg_Immunity.2013_PMID.24138885	-0.595599	Shehata2012_Stroma_PMID.25575446	-1.07215	MM_p53null.Luminal_Genome.Biol.2013_PMID.24220145	-1.17461	Bcells_Memory_J.Clin.Oncol.2015_PMID.25800755	-0.835852	TCGA_TGFB_score_21050467_Immunity.2018_PMID._29628290	-1.08801
Pcorr_Dasatinib_R_Correlation_Cancer.Res.2007_PMID.17332353	-0.283524	X16.13_Amplicon_BMC.Med.Genomics.2011_PMID.21214954	0.299944	IMMUNE_Bindea_Cell_DC_Immunity.2013_PMID.24138885	-0.601788	Duke_Module01_acidosis_Mike_PMID.20335537	-1.07305	GENE_PANEL_TRUSEQ_40_ILLUMINA	-1.18802	IMMUNE_Bindea_Cell_Lymph_vessels_Immunity.2013_PMID.24138885	-0.849008	LOBULAR_TCGA_SIGNATURE_Reactive_like_Cell.2015_PMID.26451490	-1.11887
Bcells_Naive_J.Clin.Oncol.2015_PMID.25800755	-0.285384	TCGA.BRCA.1198_FGFR4_EGF_JCI.2020_PMID.32573490	0.297434	Lim.et.al.2010.Conserved.Luminal.Progenitor_BCR.2010_PMID.20346151	-0.605214	Pfefferle2012_Stroma_PMID.25575446	-1.07308	Spike2012_fStr_PMID.25575446	-1.18999	MFGFR2_BMC.Med.Genomics.2011_PMID.21214954	-0.850047	Fibroblasts_MCP_PMID.31942075_PMID.31942077	-1.12308
Bcells_Plasmablast_J.Clin.Oncol.2015_PMID.25800755	-0.289166	Pcorr_primitive_CCR.2010_PMID.20643781	0.273387	MDSC_tumor_MO_Schlecker_J.Immunol.2012_PMID.23152559	-0.605732	Myeloid_dendritic_cells_MCP_PMID.31942075_PMID.31942077	-1.07403	IMMUNE_Bindea_Cell_Neutrophils_Immunity.2013_PMID.24138885	-1.21105	PDGFRB_Single_Gene	-0.853964	Murat_G07_J.Clin.Oncol.2008_PMID.18565887	-1.12556
Duke_Module21_tgfb_Mike_PMID.20335537	-0.290463	HRAS_Single_Gene	0.270055	MDSC_Neutrophil_Youn_J_Leukoc_Biol.2012_PMID.21954284	-0.605811	CIBERSORT_T_cells_CD4_naive_Nat.Methods.2015_PMID.25822800	-1.07528	MProtocadherin_BMC.Med.Genomics.2011_PMID.21214954	-1.21551	CTLA4_Single_Gene	-0.855972	LOBULAR_TCGA_SUBTYPE_Proliferative_Cell.2015_PMID.26451490	-1.12843
MDSC_tumor_Schlecker_J.Immunol.2012_PMID.23152559	-0.290782	HER1_Cluster2_BMC.Genomics.2007_PMID.17663798	0.266018	Inflammatory_Breast_Cancer_79_IBC_CCR.2013_PMID.23396049	-0.608056	TCGA.BRCA.1198_COLLAGEN11A_JCI.2020_PMID.32573490	-1.07591	TCGA.BRCA.1198_IL8_CCL_JCI.2020_PMID.32573490	-1.22121	GSEA_GP15_EGF_signailng.r.0.936_NAGASHIMA_EGF_SIGNALING_UP	-0.861578	MM_Squamous.like_Genome.Biol.2013_PMID.24220145	-1.13076
T_RM_Cell_single_cell_signature_Savas_Nat_Med.2018_PMID.29942092	-0.291726	S100A9_A8_BMC.Med.Genomics.2011_PMID.21214954	0.265276	Pfefferle2012_LumProg_PMID.25575446	-0.610685	Vascular.Content_Clin.Exp.Metastasis.2014_PMID.23975155	-1.07799	IMMUNE_Bindea_Cell_Normal_mucosa_Immunity.2013_PMID.24138885	-1.23376	TCGA.BRCA.1198_UNKNOWN2_JCI.2020_PMID.32573490	-0.864447	Mature_Luminal_Down_Nat.Med.2009_PMID.19648928	-1.1379
Spike2012_fMaSC_PMID.25575446	-0.29342	LumProg_Lim09_BCR.2015_PMID.25575446	0.241755	PDCD1_Single_Gene	-0.615546	IMMUNE_Bindea_Cell_Normal_mucosa_Immunity.2013_PMID.24138885	-1.081	aStr_HsEnriched_Refined2_BCR.2015_PMID.25575446	-1.23543	METAPLASTIC_Up_CanRes.2009_PMID.19435916	-0.868851	Lung.WNT.DiMeo_Cancer.Res.2009_PMID.19549913	-1.15758
Stingl_Up_Basal_High_Nat.Cell.Biol.2014_PMID.25173976	-0.293433	Her2_Basal_JCI.2020_PMID.32573490	-0.188126	Interferon_Cluster_BMC.Med.Genomics.2011_PMID.21214954	-0.624032	Wahl_aMaSC_Signature_Cell.Stem.Cell.2012_PMID.22305568	-1.08545	MNB2_BMC.Med.Genomics.2011_PMID.21214954	-1.24428	TCGA.BRCA.1198_BASAL_JCI.2020_PMID.32573490	-0.879278	TCGA.BRCA.1198_TP63_JCI.2020_PMID.32573490	-1.16856
African_and_European_Ancestry_in_TCGA_Negative_JAMA.Oncol.2017_PMID.28472234	-0.299969	LumProg_HsEnriched_Refined1_BCR.2015_PMID.25575446	-0.25055	TCGA.BRCA.1198_immune_INTERFERON_JCI.2020_PMID.32573490	-0.625784	TCGA_LIexpression_score_Immunity.2018_PMID._29628290	-1.08561	B_lineage_MCP_PMID.31942075_PMID.31942077	-1.25291	Stingl_Down_Basal_High_Nat.Cell.Biol.2014_PMID.25173976	-0.890748	METAPLASTIC_Up_CanRes.2009_PMID.19435916	-1.17582
IMMUNE_Bindea_Cell_B_cells_Immunity.2013_PMID.24138885	-0.302258	Stingl_Up_Basal_High_Nat.Cell.Biol.2014_PMID.25173976	-0.275676	MM_p53null.Luminal_Genome.Biol.2013_PMID.24220145	-0.630905	MDSC_Neutrophil_Youn_J_Leukoc_Biol.2012_PMID.21954284	-1.09684	Spike2012_aMaSC_PMID.25575446	-1.25554	Pcorr_squamoid_PLOS.2012_PMID.22590557	-0.893399	EMT_UP_Weinberg_PNAS.2010_PMID.20713713	-1.20184
LumProg_HsEnriched_Refined1_BCR.2015_PMID.25575446	-0.30488	MYC_Single_Gene	-0.283137	REPLICATION_STRESS_UP_SET_Cell.Rep.2018_PMID.29768207	-0.634816	REPLICATION_STRESS_NEG_Cell.Rep.2018_PMID.29768207	-1.09997	MRibosomal_BMC.Med.Genomics.2011_PMID.21214954	-1.26271	Lung.WNT.DiMeo_Cancer.Res.2009_PMID.19549913	-0.902182	aStr_Shehata_BCR.2015_PMID.25575446	-1.2022
T.cells_MCP_PMID.31942075_PMID.31942077	-0.305239	IMMUNE_Bindea_Cell_SW480_cancer_cells_Immunity.2013_PMID.24138885	-0.322878	TCGA.BRCA.1198_IL8_CCL_JCI.2020_PMID.32573490	-0.637056	MHC_Forero_11_Cancer.Immunol.Res.2016_PMID.26980599	-1.10246	REPLICATION_STRESS_UP_SET_Cell.Rep.2018_PMID.29768207	-1.27277	Pfefferle2012_MaSC_PMID.25575446	-0.922701	MM_Claudinlow_Genome.Biol.2013_PMID.24220145	-1.21873
Monocytic_lineage_MCP_PMID.31942075_PMID.31942077	-0.3053	UNC_Scorr_LumA_Correlation_JCO.2009_PMID.19204204	-0.323685	Verhaak_Stromal_Nat.Commun.2013_PMID.24113773	-0.640679	Pcorr_squamoid_PLOS.2012_PMID.22590557	-1.10693	IMMUNE_Bindea_Cell_Cytotoxic_cells_Immunity.2013_PMID.24138885	-1.27577	IMMUNE_Bindea_Cell_Normal_mucosa_Immunity.2013_PMID.24138885	-0.926135	LOBULAR_TCGA_SUBTYPE_Reactive_like_Cell.2015_PMID.26451490	-1.21949
aStr_Shehata_BCR.2015_PMID.25575446	-0.306758	MFGFR2_BMC.Med.Genomics.2011_PMID.21214954	-0.323744	Mouse_Human_ImmuneProfiles_SHAY_M_H_Induced_in_MO_PNAS.2013_PMID.23382184_	-0.642163	Scorr_EMAT1_Correlation_BCR.2020_PMID.32641077	-1.10781	MDSC_Neutrophil_Youn_J_Leukoc_Biol.2012_PMID.21954284	-1.27856	High_In_No_Response_MCP_TLS_Melanoma_PMID.31942075	-0.926937	Up_regulated_upon_N_RAS_repression_Cell_Rep.2015_PMID.26166574	-1.22079
ACTIVATED_CANCER_CELL_SIGNATURE_Nat.Cell.Biol.2019_PMID.31263265	-0.30705	CD34_CD36_Cluster_BMC.Med.Genomics.2011_PMID.21214954	-0.324882	CD274_Single_Gene	-0.642335	GSEA_GP6_Squamous_differentiation_development.r.0.902_RICKMAN_TUMOR_DIFFERENTIATED_WELL_VS_POORLY_DN	-1.1107	IMMUNE_Bindea_Cell_pDC_Immunity.2013_PMID.24138885	-1.28754	IMMUNE_Bindea_Cell_Mast_cells_Immunity.2013_PMID.24138885	-0.937072	CD34_CD36_Cluster_BMC.Med.Genomics.2011_PMID.21214954	-1.22448
Down_regulated_upon_N_RAS_repression_Cell_Rep.2015_PMID.26166574	-0.309491	Scorr_IE_Correlation_JCO.2006_PMID.16505416	-0.326609	Mouse_Human_ImmuneProfiles_SHAY_M_H_Induced_in_GN_PNAS.2013_PMID.23382184_	-0.644373	Inflammatory_Breast_Cancer_79_IBC_CCR.2013_PMID.23396049	-1.1141	Mouse_Human_ImmuneProfiles_SHAY_M_H_Induced_in_GN_PNAS.2013_PMID.23382184_	-1.29306	MM_p53null.Basal_Genome.Biol.2013_PMID.24220145	-0.9413	Shehata2012_Basal_PMID.25575446	-1.23073
Durvalumab_signature_Higgs_Clin.Cancer.Res.2018_PMID.29716923	-0.312289	GO_DOWN_with_SOX10_OE_Cell.Rep.2015_PMID.26365194	-0.326761	TCGA_Module3_IFN_score_Immunity.2018_PMID._29628290	-0.651485	MM_Squamous.like_Genome.Biol.2013_PMID.24220145	-1.11427	MECM_BMC.Med.Genomics.2011_PMID.21214954	-1.30366	Bcells_Naive_J.Clin.Oncol.2015_PMID.25800755	-0.95354	MM_Myoepithelioma.like_Genome.Biol.2013_PMID.24220145	-1.2362
IMMUNE_PEREZ_14_JCO.2015_PMID.2560586	-0.312803	TCGA.BRCA.1198_NORMAL_JCI.2020_PMID.32573490	-0.33378	IMMUNE_Bindea_Cell_Th1_cells_Immunity.2013_PMID.24138885	-0.664277	TLS_Known_MARKERS_PMID.31942071	-1.11569	Duke_Module22_tnfa_Mike_PMID.20335537	-1.30932	Scorr_EMAT1_Correlation_BCR.2020_PMID.32641077	-0.964843	Lim2009_MaSC_Adam_PMID.25575446	-1.24248
Lim2010_LumProg_Adam_PMID.25575446	-0.312805	MNOtch4_BMC.Med.Genomics.2011_PMID.21214954	-0.334399	CD68_cluster_Iglesia_CCR.2014_PMID.24916698	-0.670414	IMMUNE_Bindea_Cell_Neutrophils_Immunity.2013_PMID.24138885	-1.11676	IMMUNE_Bindea_Cell_B_cells_Immunity.2013_PMID.24138885	-1.31352	BASAL_Cluster_BMC.Med.Genomics.2011_PMID.21214954	-0.969751	MDACC.FNA.2_J.Clin.Oncol.2010_PMID.20805453	-1.24396
GO_DOWN_with_SOX10_OE_Cell.Rep.2015_PMID.26365194	-0.313316	Stromal_Signature_Nat.Med.2008_PMID.18438415	-0.334624	REPLICATION_STRESS_POS_Cell.Rep.2018_PMID.29768207	-0.676468	MacTh1_cluster_Iglesia_CCR.2014_PMID.24916698	-1.11816	Bcell_IL10_MINUS_LIN_J_Immunol.2014_PMID.25080484	-1.31567	LOBULAR_TCGA_SIGNATURE_Reactive_like_Cell.2015_PMID.26451490	-0.973441	Vascular.Content_Clin.Exp.Metastasis.2014_PMID.23975155	-1.2446
BPMS_7.Genes_PLoS.One.2013_PMID.24349199	-0.31437	CDKN2A_Single_Gene	-0.343348	CD103_Negative_Cancer.Cell.2014_PMID.25446897	-0.678149	Fibromatosis_Lab.Invest.2008_PMID.18414401	-1.1184	Tcell_EXH_Anti_PDL1_vs_control_treated_exhausted_CD8_T_cell_Metagene_1_Science.2016_PMID.27789795	-1.33036	MM_Potluck_1pFDR_UP_Genome.Biology.2007_PMID.17493263	-0.980501	AMPH_EPIREGULIN_Cluster_BMC.Med.Genomics.2011_PMID.21214954	-1.25192
CIBERSORT_Eosinophils_Nat.Methods.2015_PMID.25822800	-0.315106	Wahl_fMasC_Signature_Cell.Stem.Cell.2012_PMID.22305568	-0.351211	Shehata2012_ALDHpos_PMID.25575446	-0.681592	REPLICATION_STRESS_UP_SET_Cell.Rep.2018_PMID.29768207	-1.12089	Scorr_EMAT1_Correlation_BCR.2020_PMID.32641077	-1.33483	Mature_Luminal_Down_Nat.Med.2009_PMID.19648928	-0.980784	TCGA.BRCA.1198_UNKNOWN3_JCI.2020_PMID.32573490	-1.25896
DAN_ImmuneActive_Cell.2019_PMID.31730857	-0.317092	CIBERSORT_Mast_cells_resting_Nat.Methods.2015_PMID.25822800	-0.352117	LumProg_HsEnriched_BCR.2015_PMID.25575446	-0.684894	Duke_Module11_ifng_Mike_PMID.20335537	-1.1212	REPLICATION_STRESS_POS_Cell.Rep.2018_PMID.29768207	-1.33611	Stingl_Day7_Downregulated_Nat.Cell.Biol.2014_PMID.25173976	-0.983529	HRneg.Tneg_14.Genes_BCR.2010_PMID.20946665	-1.25907
Immunosuppression_PMID.31942077	-0.317354	Spike2012_fMaSC_PMID.25575446	-0.354115	MM_Potluck_1pFDR_UP_Genome.Biology.2007_PMID.17493263	-0.68852	MCD3_CD8_BMC.Med.Genomics.2011_PMID.21214954	-1.12491	Lums_HER2E_UP_metastatic.signature_JCI.2020_PMID.32573490	-1.34167	ACTIVATED_CANCER_CELL_SIGNATURE_Nat.Cell.Biol.2019_PMID.31263265	-0.985775	aStr_HsEnriched_BCR.2015_PMID.25575446	-1.26182
METAPLASTIC_Up_CanRes.2009_PMID.19435916	-0.31921	IMMUNE_Bindea_Cell_Lymph_vessels_Immunity.2013_PMID.24138885	-0.359003	Bcells_Centrocyte_J.Clin.Oncol.2015_PMID.25800755	-0.692565	CIBERSORT_Eosinophils_Nat.Methods.2015_PMID.25822800	-1.1287	TLS_Hallmark_Gene_Signature_PMID.31942071	-1.34168	IMMUNE_Bindea_Cell_Th1_cells_Immunity.2013_PMID.24138885	-0.992328	aStr_Prat_BCR.2015_PMID.25575446	-1.26847
Bcells_Memory_J.Clin.Oncol.2015_PMID.25800755	-0.319258	CTLA4_Single_Gene	-0.36094	CIBERSORT_Mast_cells_resting_Nat.Methods.2015_PMID.25822800	-0.704931	CIBERSORT_T_cells_gamma_delta_Nat.Methods.2015_PMID.25822800	-1.1292	MDSC_tumor_MO_Schlecker_J.Immunol.2012_PMID.23152559	-1.34315	LOBULAR_TCGA_SUBTYPE_Proliferative_Cell.2015_PMID.26451490	-1.01973	MVEGFC_BMC.Med.Genomics.2011_PMID.21214954	-1.27172
LOBULAR_TCGA_SIGNATURE_Immune_related_Cell.2015_PMID.26451490	-0.319614	PDGFRB_Single_Gene	-0.361268	MIR_200c_Induced_ONCO.2015_PMID.25746005	-0.708743	M2_Macrophage_Blood.2006_PMID.16556895	-1.13453	Duke_Module11_ifng_Mike_PMID.20335537	-1.34726	REPLICATION_STRESS_UP_SET_Cell.Rep.2018_PMID.29768207	-1.02033	Pcorr_Breast2Lung_LM2_Correlation_Nature.2005_PMID.16049480	-1.27529
Spike2012_fStr_PMID.25575446	-0.319794	African_and_European_Ancestry_in_TCGA_Negative_JAMA.Oncol.2017_PMID.28472234	-0.361709	Bcell_IL10_MINUS_LIN_J_Immunol.2014_PMID.25080484	-0.726941	GSEA_GP4_MES_ECM.r.0.954_PerouLab_HS_Red7_BMC_Med_Genomics_2011_PMID.21214954	-1.13528	Myeloid_dendritic_cells_MCP_PMID.31942075_PMID.31942077	-1.35186	Scorr_EMAT2_Correlation_BCR.2020_PMID.32641077	-1.03336	GSEA_GP4_MES_ECM.r.0.954_PerouLab_HS_Red7_BMC_Med_Genomics_2011_PMID.21214954	-1.27969
CIBERSORT_Macrophages_M1_Nat.Methods.2015_PMID.25822800	-0.322313	Scorr_EMAT1_Correlation_BCR.2020_PMID.32641077	-0.365876	Mouse_Human_ImmuneProfiles_SHAY_M_H_Induced_in_NK_PNAS.2013_PMID.23382184_	-0.731169	REPLICATION_STRESS_POS_Cell.Rep.2018_PMID.29768207	-1.1374	GSEA_BIOCARTA_AKT_PATHWAY	-1.35585	CD34_CD36_Cluster_BMC.Med.Genomics.2011_PMID.21214954	-1.03793	ACTIVATED_CANCER_CELL_SIGNATURE_Nat.Cell.Biol.2019_PMID.31263265	-1.2908
CIBERSORT_T_cells_follicular_helper_Nat.Methods.2015_PMID.25822800	-0.322621	HRneg.Tneg_14.Genes_BCR.2010_PMID.20946665	-0.369842	Influenza_11genes_Metasignature_KHATRI_Immunity.2015_PMID.26682989	-0.754242	MM_p53null_1pFDR_UP_Genome.Biology.2007_PMID.17493263	-1.13872	MHC.I_Breast.Cancer.Research.2008_PMID.19272155	-1.36765	Fibroblasts_MCP_PMID.31942075_PMID.31942077	-1.04231	Lim2010_Stroma_Adam_PMID.25575446	-1.29724
PGR_Single_Gene	-0.322961	IMMUNE_Bindea_Cell_Th1_cells_Immunity.2013_PMID.24138885	-0.371555	CIBERSORT_Plasma_cells_Nat.Methods.2015_PMID.25822800	-0.759106	aStr_Prat_BCR.2015_PMID.25575446	-1.13954	IMMUNE_Bindea_Cell_CD8_T_cells_Immunity.2013_PMID.24138885	-1.375	Vascular.Content_Clin.Exp.Metastasis.2014_PMID.23975155	-1.047	Pfefferle2012_Stroma_PMID.25575446	-1.29962
GSEA_GP2_Immune_Tcell_Bcell.r.0.964_KEGG_HEMATOPOIETIC_CELL_LINEAGE	-0.323477	REPLICATION_STRESS_POS_Cell.Rep.2018_PMID.29768207	-0.372263	Myeloid_dendritic_cells_MCP_PMID.31942075_PMID.31942077	-0.761333	MDSC_tumor_MO_Schlecker_J.Immunol.2012_PMID.23152559	-1.13984	TLS_Known_MARKERS_PMID.31942071	-1.38115	TCGA_TGFB_score_21050467_Immunity.2018_PMID._29628290	-1.0533	MECM_BMC.Med.Genomics.2011_PMID.21214954	-1.30076
CDKN2A_Single_Gene	-0.323509	Pcorr_squamoid_PLOS.2012_PMID.22590557	-0.372829	GSEA_GP11_Immune_IFN.r.0.965_PerouLab_MInterferon_Cluster_BMC_Med_Genomics_2011_PMID.21214954	-0.765009	EMT_UP_Weinberg_PNAS.2010_PMID.20713713	-1.14334	CORE_B_CELL_signatures_Garber_Cell.Mol.Gastroenterol.Hepatol.2017_PMID.28508029	-1.3842	REPLICATION_STRESS_POS_Cell.Rep.2018_PMID.29768207	-1.05408	aMaSC_HsEnriched_BCR.2015_PMID.25575446	-1.31217
TNBC_Clinically_Relevant_Good.26_BCR.2011_PMID.21978456	-0.323818	aStr_Prat_BCR.2015_PMID.25575446	-0.373913	TCGA.BRCA.1198_immune_GIMAP_IL16_JCI.2020_PMID.32573490	-0.771004	CIBERSORT_T_cells_regulatory_Tregs_Nat.Methods.2015_PMID.25822800	-1.14674	CIBERSORT_Eosinophils_Nat.Methods.2015_PMID.25822800	-1.39077	Murat_G07_J.Clin.Oncol.2008_PMID.18565887	-1.05617	Lim2010_MaSC_Adam_PMID.25575446	-1.31364
MDSC_tumor_MO_Schlecker_J.Immunol.2012_PMID.23152559	-0.323874	REPLICATION_STRESS_UP_SET_Cell.Rep.2018_PMID.29768207	-0.374055	CIBERSORT_B_cells_naive_Nat.Methods.2015_PMID.25822800	-0.774011	LCK_Breast.Cancer.Research.2008_PMID.19272155	-1.14734	T_RM_Cell_single_cell_signature_Savas_Nat_Med.2018_PMID.29942092	-1.3949	Verhaak_Stromal_Nat.Commun.2013_PMID.24113773	-1.05659	Fibroblast_Cluster_BMC.Med.Genomics.2011_PMID.21214954	-1.31434
Immune_High_In_Response_MCP_TLS_Melanoma_PMID.31942075	-0.326044	Duke_Module21_tgfb_Mike_PMID.20335537	-0.381153	TCGA.BRCA.1198_immune_CD19_JCI.2020_PMID.32573490	-0.77432	STAT3_Basal_Horvath_SHORT_PNAS.2014_PMID.25139989	-1.1501	STAT1_Breast.Cancer.Research.2008_PMID.19272155	-1.40628	LOBULAR_TCGA_SUBTYPE_Reactive_like_Cell.2015_PMID.26451490	-1.06029	Shehata2012_Stroma_PMID.25575446	-1.32477
CD34_CD36_Cluster_BMC.Med.Genomics.2011_PMID.21214954	-0.32833	Mature_Luminal_Down_Nat.Med.2009_PMID.19648928	-0.381441	Bcells_Plasmablast_J.Clin.Oncol.2015_PMID.25800755	-0.777272	CIBERSORT_Mast_cells_activated_Nat.Methods.2015_PMID.25822800	-1.15214	T_cell_activation_PMID.31942077	-1.41418	MM_Class8_Genome.Biol.2013_PMID.24220145	-1.06893	aStr_HsEnriched_Refined2_BCR.2015_PMID.25575446	-1.33092
TCGA.BRCA.1198_UNKNOWN3_JCI.2020_PMID.32573490	-0.329173	Shehata2012_ALDHneg_PMID.25575446	-0.383251	IMMUNE_Bindea_Cell_Cytotoxic_cells_Immunity.2013_PMID.24138885	-0.777961	Miller_M_D_Metagene_Genome_Biol_2013_PMID.23618380	-1.15235	Pcorr_squamoid_PLOS.2012_PMID.22590557	-1.41627	AMPH_EPIREGULIN_Cluster_BMC.Med.Genomics.2011_PMID.21214954	-1.07129	Scorr_EMAT2_Correlation_BCR.2020_PMID.32641077	-1.34048
MERCK_Immune_signature_Science.2018_PMID.30309915	-0.330451	IMMUNE_Bindea_Cell_Normal_mucosa_Immunity.2013_PMID.24138885	-0.387721	Pcorr_squamoid_PLOS.2012_PMID.22590557	-0.779972	Fibroblast_Cluster_BMC.Med.Genomics.2011_PMID.21214954	-1.15426	MDACC.FNA.2_J.Clin.Oncol.2010_PMID.20805453	-1.42258	MM_Squamous.like_Genome.Biol.2013_PMID.24220145	-1.07463	African_and_European_Ancestry_in_TCGA_Negative_JAMA.Oncol.2017_PMID.28472234	-1.3441
PDGFRB_Single_Gene	-0.331691	MM_p53null.Basal_Genome.Biol.2013_PMID.24220145	-0.388439	MHC.I_Breast.Cancer.Research.2008_PMID.19272155	-0.78505	CIBERSORT_Macrophages_M0_Nat.Methods.2015_PMID.25822800	-1.15767	Bcells_Memory_J.Clin.Oncol.2015_PMID.25800755	-1.42408	aStr_Shehata_BCR.2015_PMID.25575446	-1.08353	Stromal_Up_Nat.Med.2009_PMID.19648928	-1.35426
CIBERSORT_Dendritic_cells_resting_Nat.Methods.2015_PMID.25822800	-0.332035	TCGA.BRCA.1198_UNKNOWN3_JCI.2020_PMID.32573490	-0.391836	Cytotoxic_lymphocytes_MCP_PMID.31942075_PMID.31942077	-0.788942	GO_DOWN_with_SOX10_OE_Cell.Rep.2015_PMID.26365194	-1.16146	TNBC_Clinically_Relevant_Good.26_BCR.2011_PMID.21978456	-1.42443	African_and_European_Ancestry_in_TCGA_Negative_JAMA.Oncol.2017_PMID.28472234	-1.0974	Lim2009_Stroma_Adam_PMID.25575446	-1.35585
TCGA.BRCA.1198_NORMAL_JCI.2020_PMID.32573490	-0.334586	Pfefferle2012_MaSC_PMID.25575446	-0.393435	Bcells_Memory_J.Clin.Oncol.2015_PMID.25800755	-0.793901	Endothelial_cells_MCP_PMID.31942075_PMID.31942077	-1.16179	B_Cell_cluster_Iglesia_CCR.2014_PMID.24916698	-1.43138	TCGA.BRCA.1198_TP63_JCI.2020_PMID.32573490	-1.10487	MBASAL_BMC.Med.Genomics.2011_PMID.21214954	-1.35909
Tcell_EXH_Effector_CD8_T_cell_at_day_8_p.i_Armstrong_vs_Naive_CD8_T_cell_Metagene_1_Science.2016_PMID.27789795	-0.335957	MECM_BMC.Med.Genomics.2011_PMID.21214954	-0.400163	CIBERSORT_Monocytes_Nat.Methods.2015_PMID.25822800	-0.799018	Mouse_Human_ImmuneProfiles_SHAY_M_H_Induced_in_GN_PNAS.2013_PMID.23382184_	-1.16324	CIBERSORT_Mast_cells_resting_Nat.Methods.2015_PMID.25822800	-1.43387	Lim2009_MaSC_Adam_PMID.25575446	-1.1188	Troester_Wound_Signature_Clin.Cancer.Res.2009_PMID.19887484	-1.36841
TCGA.BRCA.1198_IMMUNOGLOBULIN_PMID.26451490	-0.338859	ACTIVATED_CANCER_CELL_SIGNATURE_Nat.Cell.Biol.2019_PMID.31263265	-0.403354	Scorr_EMAT1_Correlation_BCR.2020_PMID.32641077	-0.799902	TCGA.BRCA.1198_immune_CD8_GZMK_JCI.2020_PMID.32573490	-1.16442	Cytolytic_activity_signature_Rooney_Cell.2015_PMID.25594174	-1.43829	aMaSC_HsEnriched_BCR.2015_PMID.25575446	-1.12356	MM_Wnt1.Early_Genome.Biol.2013_PMID.24220145	-1.37285
Bcell_Tcell_Cooperation_Cell.2019_PMID.31730857	-0.339065	fMaSC.refined1_PMID.25575446	-0.404373	EXTENDED_B_CELL_signatures_Garber_Cell.Mol.Gastroenterol.Hepatol.2017_PMID.28508029	-0.80499	TLS_tumors_w_TLS_and_CD8_v_CD8alone_PMID.31942071	-1.16489	IMMUNE_Bindea_Cell_Lymph_vessels_Immunity.2013_PMID.24138885	-1.44164	MM_Myoepithelioma.like_Genome.Biol.2013_PMID.24220145	-1.12579	Fibromatosis_Lab.Invest.2008_PMID.18414401	-1.37944
LOBULAR_TCGA_SIGNATURE_Reactive_like_Cell.2015_PMID.26451490	-0.342334	MM_Claudinlow_Genome.Biol.2013_PMID.24220145	-0.408176	Tcell_EXH_Memory_CD8_T_cell_a_vs_Naive_CD8_T_cell_Metagene_3_Science.2016_PMID.27789795	-0.807207	Immune_High_In_Response_MCP_TLS_Melanoma_PMID.31942075	-1.17369	ACTIVATED_BLOOD_NEUTROPHIL_SIGNATURE_Nat.Cell.Biol.2019_PMID.31263265	-1.44773	MVEGFC_BMC.Med.Genomics.2011_PMID.21214954	-1.13231	aStr_Lim09_BCR.2015_PMID.25575446	-1.38061
Tcell_EXH_Exhausted_CD8_T_cell_vs_Naive_CD8_T_cell_Metagene_1_Science.2016_PMID.27789795	-0.343272	LOBULAR_TCGA_SIGNATURE_Reactive_like_Cell.2015_PMID.26451490	-0.408635	CORE_B_CELL_signatures_Garber_Cell.Mol.Gastroenterol.Hepatol.2017_PMID.28508029	-0.808386	MECM_BMC.Med.Genomics.2011_PMID.21214954	-1.17395	STAT3_Basal_Horvath_SHORT_PNAS.2014_PMID.25139989	-1.4484	Shehata2012_Basal_PMID.25575446	-1.13664	Lim.et.al.2010.Conserved.aMaSC_BCR.2010_PMID.20346151	-1.38203
Tcell_EXH_Memory_CD8_T_cell_a_vs_Naive_CD8_T_cell_Metagene_3_Science.2016_PMID.27789795	-0.344067	METAPLASTIC_Up_CanRes.2009_PMID.19435916	-0.411852	Tcell_EXH_Memory_CD8_T_cell_a_vs_Naive_CD8_T_cell_Metagene_2_Science.2016_PMID.27789795	-0.809432	T_Cell_cluster_Iglesia_CCR.2014_PMID.24916698	-1.17492	Bcell_IL10_PLUS_LIN_J_Immunol.2014_PMID.25080484	-1.44863	Up_regulated_upon_N_RAS_repression_Cell_Rep.2015_PMID.26166574	-1.14635	MASC_Up_Nat.Med.2009_PMID.19648928	-1.39754
Shehata2012_ALDHneg_PMID.25575446	-0.344652	Lim2010_Stroma_Adam_PMID.25575446	-0.413843	IMMUNE_Bindea_Cell_aDC_Immunity.2013_PMID.24138885	-0.80963	Fibroblasts_MCP_PMID.31942075_PMID.31942077	-1.1799	JANES_Oscillation_JUND_KRT5_Nat.Cell.Biol.2014_PMID.24658685	-1.44987	aStr_HsEnriched_BCR.2015_PMID.25575446	-1.15571	TCGA.BRCA.1198_COLLAGEN11A_JCI.2020_PMID.32573490	-1.40228
AMPH_EPIREGULIN_Cluster_BMC.Med.Genomics.2011_PMID.21214954	-0.345731	MDSC_Neutrophil_Youn_J_Leukoc_Biol.2012_PMID.21954284	-0.417158	Duke_Module10_ifna_Mike_PMID.20335537	-0.81375	TCGA.BRCA.1198_immune_HLA_D_JCI.2020_PMID.32573490	-1.18067	Wahl_aMaSC_Signature_Cell.Stem.Cell.2012_PMID.22305568	-1.45413	aStr_Prat_BCR.2015_PMID.25575446	-1.15765	MM_DMBAwnt_1pFDR_UP_Genome.Biology.2007_PMID.17493263	-1.4226
IMMUNE_Bindea_Cell_Macrophages_Immunity.2013_PMID.24138885	-0.346116	Early_IRS_2_PLoS.One.2016_PMID.26991655	-0.427074	Duke_Module22_tnfa_Mike_PMID.20335537	-0.815759	STAT1_Breast.Cancer.Research.2008_PMID.19272155	-1.18103	GSEA_GP16_Protein_kinase_signailng_MAPKs.r.0.893_INTRACELLULAR_SIGNALING_CASCADE	-1.45605	Lim2010_MaSC_Adam_PMID.25575446	-1.15914	Wahl_fSTR_Signature_Cell.Stem.Cell.2012_PMID.22305568	-1.43397
Tcell_EXH_Exhausted_CD8_T_cell_vs_Naive_CD8_T_cell_Metagene_3_Science.2016_PMID.27789795	-0.346321	PGR_Single_Gene	-0.432256	CD103_Positive_Cancer.Cell.2014_PMID.25446897	-0.816909	TCGA.BRCA.1198_IL8_CCL_JCI.2020_PMID.32573490	-1.18296	Duke_Module18_ras_Mike_PMID.20335537	-1.46198	Lim2010_Stroma_Adam_PMID.25575446	-1.16156	MM_Wnt1.Late_Genome.Biol.2013_PMID.24220145	-1.43691
Pfefferle2012_MaSC_PMID.25575446	-0.347462	CIBERSORT_Mast_cells_activated_Nat.Methods.2015_PMID.25822800	-0.438741	B_lineage_MCP_PMID.31942075_PMID.31942077	-0.819545	TCGA.BRCA.1198_immune_GIMAP_IL16_JCI.2020_PMID.32573490	-1.18348	TCGA.BRCA.1198_immune_HLA_A_F_JCI.2020_PMID.32573490	-1.46224	Shehata2012_Stroma_PMID.25575446	-1.16277	MIR_200c_Repressed_ONCO.2015_PMID.25746005	-1.52134
Cytotoxic_lymphocytes_MCP_PMID.31942075_PMID.31942077	-0.3492	IMMUNE_Bindea_Cell_Mast_cells_Immunity.2013_PMID.24138885	-0.440964	TCGA.BRCA.1198_immune_HLA_A_F_JCI.2020_PMID.32573490	-0.819925	CIBERSORT_T_cells_CD8_Nat.Methods.2015_PMID.25822800	-1.18549	STAT3_Basal_Horvath_PNAS.2014_PMID.25139989	-1.4778	MM_Claudinlow_Genome.Biol.2013_PMID.24220145	-1.16728	MET_DOWN_Significant_Genes_LOW_BASALS_1_Genes_JCI.2018_PMID.29480819	-1.59445
IGG_Cluster_BMC.Med.Genomics.2011_PMID.21214954	-0.350079	Bcells_Centrocyte_J.Clin.Oncol.2015_PMID.25800755	-0.44604	IMMUNE_PEREZ_14_JCO.2015_PMID.2560586	-0.823194	T.cells_MCP_PMID.31942075_PMID.31942077	-1.18664	Mouse_Human_ImmuneProfiles_SHAY_M_H_Induced_in_T_PNAS.2013_PMID.23382184_	-1.48046	EMT_UP_Weinberg_PNAS.2010_PMID.20713713	-1.17411	Lums_HER2E_DOWN_metastatic.signature_JCI.2020_PMID.32573490	-2.04455
T_cell_activation_PMID.31942077	-0.350423	Bcell_IL10_MINUS_LIN_J_Immunol.2014_PMID.25080484	-0.448756	TLS_Hallmark_Gene_Signature_PMID.31942071	-0.829803	Murat_G24_J.Clin.Oncol.2008_PMID.18565887	-1.18689	TCGA.BRCA.1198_immune_CTLA4_CXCL_FOXP3_JCI.2020_PMID.32573490	-1.48202	Pfefferle2012_Stroma_PMID.25575446	-1.17566
TCGA.BRCA.1198_immune_CD19_JCI.2020_PMID.32573490	-0.358065	Stingl_Down_CLOW_High_Nat.Cell.Biol.2014_PMID.25173976	-0.452513	TCGA.BRCA.1198_immune_CD4_CD53_CD84_BTK_JCI.2020_PMID.32573490	-0.83173	HCK_Breast.Cancer.Research.2008_PMID.19272155	-1.18693	TCGA.BRCA.1198_immune_CD19_JCI.2020_PMID.32573490	-1.4836	MECM_BMC.Med.Genomics.2011_PMID.21214954	-1.17945
MFGFR2_BMC.Med.Genomics.2011_PMID.21214954	-0.358887	Shehata2012_Stroma_PMID.25575446	-0.453502	CIBERSORT_Macrophages_M0_Nat.Methods.2015_PMID.25822800	-0.841741	Mouse_Human_ImmuneProfiles_SHAY_M_H_Induced_in_DC_PNAS.2013_PMID.23382184_	-1.18783	TCGA_TGFB_score_21050467_Immunity.2018_PMID._29628290	-1.48816	Pcorr_Breast2Lung_LM2_Correlation_Nature.2005_PMID.16049480	-1.19061
MM_p53null.Basal_Genome.Biol.2013_PMID.24220145	-0.359795	Scorr_S329_L_Correlation_Br.J.Cancer.2008_PMID.18382427	-0.45454	STAT3_Basal_Horvath_PNAS.2014_PMID.25139989	-0.843761	CIBERSORT_T_cells_follicular_helper_Nat.Methods.2015_PMID.25822800	-1.19045	Tcell_EXH_Exhausted_CD8_T_cell_vs_Naive_CD8_T_cell_Metagene_1_Science.2016_PMID.27789795	-1.48924	Lim.et.al.2010.Conserved.aMaSC_BCR.2010_PMID.20346151	-1.19529
Scorr_S329_L_Correlation_Br.J.Cancer.2008_PMID.18382427	-0.361173	MIR_200c_Repressed_ONCO.2015_PMID.25746005	-0.457752	STAT3_Basal_Horvath_SHORT_PNAS.2014_PMID.25139989	-0.84967	GSEA_GP16_Protein_kinase_signailng_MAPKs.r.0.893_INTRACELLULAR_SIGNALING_CASCADE	-1.19145	CIBERSORT_Macrophages_M2_Nat.Methods.2015_PMID.25822800	-1.49639	Lim2009_Stroma_Adam_PMID.25575446	-1.19637
MM_Potluck_1pFDR_UP_Genome.Biology.2007_PMID.17493263	-0.362081	aStr_HsEnriched_BCR.2015_PMID.25575446	-0.46161	Tcell_EXH_Exhausted_CD8_T_cell_vs_Naive_CD8_T_cell_Metagene_1_Science.2016_PMID.27789795	-0.852771	T_cell_activation_PMID.31942077	-1.19199	MDSC_tumor_Schlecker_J.Immunol.2012_PMID.23152559	-1.50384	MDACC.FNA.2_J.Clin.Oncol.2010_PMID.20805453	-1.1973
B_Cell_cluster_Iglesia_CCR.2014_PMID.24916698	-0.362295	Up_regulated_upon_N_RAS_repression_Cell_Rep.2015_PMID.26166574	-0.466788	MM_p53null_1pFDR_UP_Genome.Biology.2007_PMID.17493263	-0.852879	CD8_cluster_Iglesia_CCR.2014_PMID.24916698	-1.19651	Inflammatory_Breast_Cancer_79_IBC_CCR.2013_PMID.23396049	-1.50917	MBASAL_BMC.Med.Genomics.2011_PMID.21214954	-1.204
Mature_Luminal_Down_Nat.Med.2009_PMID.19648928	-0.365941	Murat_G07_J.Clin.Oncol.2008_PMID.18565887	-0.467151	MacTh1_cluster_Iglesia_CCR.2014_PMID.24916698	-0.852951	LOBULAR_TCGA_SUBTYPE_Immune_related_Cell.2015_PMID.26451490	-1.20791	IMMUNE_Bindea_Cell_TFH_Immunity.2013_PMID.24138885	-1.50981	Stromal_Up_Nat.Med.2009_PMID.19648928	-1.20694
aStr_Prat_BCR.2015_PMID.25575446	-0.365995	AMPH_EPIREGULIN_Cluster_BMC.Med.Genomics.2011_PMID.21214954	-0.475198	CIBERSORT_T_cells_CD4_naive_Nat.Methods.2015_PMID.25822800	-0.856985	aStr_HsEnriched_BCR.2015_PMID.25575446	-1.2082	TCGA_Tfh_cells_Immunity.2018_PMID._29628290	-1.50981	TCGA.BRCA.1198_UNKNOWN3_JCI.2020_PMID.32573490	-1.21079
fMaSC.refined1_PMID.25575446	-0.372441	aStr_HsEnriched_Refined2_BCR.2015_PMID.25575446	-0.475752	Parity_signature_Troester_40_BCR.2014_PMID.25005139	-0.863168	CIBERSORT_Macrophages_M2_Nat.Methods.2015_PMID.25822800	-1.21028	CIBERSORT_T_cells_CD4_naive_Nat.Methods.2015_PMID.25822800	-1.51294	aStr_Lim09_BCR.2015_PMID.25575446	-1.2213
Mouse_Human_ImmuneProfiles_SHAY_M_H_Induced_in_NK_PNAS.2013_PMID.23382184_	-0.374108	TCGA_TGFB_score_21050467_Immunity.2018_PMID._29628290	-0.477473	MHC_Forero_24_Cancer.Immunol.Res.2016_PMID.26980599	-0.864558	T_RM_Cell_single_cell_signature_Savas_Nat_Med.2018_PMID.29942092	-1.21036	Immune_Suppression_Kardos_JCI.Insight.2016_PMID.27699256	-1.51948	MASC_Up_Nat.Med.2009_PMID.19648928	-1.22712
TCGA.BRCA.1198_IMMUNE1_JCI.2020_PMID.32573490	-0.3768	LOBULAR_TCGA_SUBTYPE_Proliferative_Cell.2015_PMID.26451490	-0.47969	Tcell_EXH_Anti_PDL1_vs_control_treated_exhausted_CD8_T_cell_Metagene_1_Science.2016_PMID.27789795	-0.870568	TCGA.BRCA.1198_UNKNOWN2_JCI.2020_PMID.32573490	-1.21334	CIBERSORT_T_cells_regulatory_Tregs_Nat.Methods.2015_PMID.25822800	-1.51994	MM_DMBAwnt_1pFDR_UP_Genome.Biology.2007_PMID.17493263	-1.22998
HRneg.Tneg_14.Genes_BCR.2010_PMID.20946665	-0.380528	TCGA.BRCA.1198_BASAL_JCI.2020_PMID.32573490	-0.49373	CIBERSORT_B_cells_memory_Nat.Methods.2015_PMID.25822800	-0.874325	CD103_Positive_Cancer.Cell.2014_PMID.25446897	-1.21578	MM_Potluck_1pFDR_UP_Genome.Biology.2007_PMID.17493263	-1.52176	GSEA_GP4_MES_ECM.r.0.954_PerouLab_HS_Red7_BMC_Med_Genomics_2011_PMID.21214954	-1.23096
CIBERSORT_Dendritic_cells_activated_Nat.Methods.2015_PMID.25822800	-0.380903	EMT_UP_Weinberg_PNAS.2010_PMID.20713713	-0.493956	Claudin_High_Genome.Biol.2007_PMID.17493263	-0.878561	STAT3_Basal_Horvath_PNAS.2014_PMID.25139989	-1.21726	Murat_G24_J.Clin.Oncol.2008_PMID.18565887	-1.52473	MM_Wnt1.Early_Genome.Biol.2013_PMID.24220145	-1.23357
B_lineage_MCP_PMID.31942075_PMID.31942077	-0.381155	MASC_Up_Nat.Med.2009_PMID.19648928	-0.497606	TLS_Known_MARKERS_PMID.31942071	-0.884559	CIBERSORT_T_cells_CD4_memory_resting_Nat.Methods.2015_PMID.25822800	-1.22021	HCK_Breast.Cancer.Research.2008_PMID.19272155	-1.53025	Troester_Wound_Signature_Clin.Cancer.Res.2009_PMID.19887484	-1.26222
Bcell_IL10_PLUS_LIN_J_Immunol.2014_PMID.25080484	-0.383528	MM_Squamous.like_Genome.Biol.2013_PMID.24220145	-0.500124	Miller_T_NK_Metagene_Genome_Biol_2013_PMID.23618380	-0.885317	aStr_Shehata_BCR.2015_PMID.25575446	-1.22593	TCGA.BRCA.1198_immune_CD4_CD53_CD84_BTK_JCI.2020_PMID.32573490	-1.53182	HRneg.Tneg_14.Genes_BCR.2010_PMID.20946665	-1.2667
Stromal_Inflammation_J.Pathol.2017_PMID.27861902	-0.384656	Verhaak_Stromal_Nat.Commun.2013_PMID.24113773	-0.500462	Bcell_Tcell_Cooperation_Cell.2019_PMID.31730857	-0.888562	IMMUNE_PEREZ_87_JCO.2015_PMID.2560586	-1.2355	Ribosomal_Cluster_BMC.Med.Genomics.2011_PMID.21214954	-1.53337	aStr_HsEnriched_Refined2_BCR.2015_PMID.25575446	-1.2759
IMMUNE_Bindea_Cell_Normal_mucosa_Immunity.2013_PMID.24138885	-0.385655	MM_Wnt1.Early_Genome.Biol.2013_PMID.24220145	-0.505111	B_Cell_cluster_Iglesia_CCR.2014_PMID.24916698	-0.88863	Stromal_Inflammation_J.Pathol.2017_PMID.27861902	-1.23944	MM_Claudinlow_Genome.Biol.2013_PMID.24220145	-1.53884	Fibroblast_Cluster_BMC.Med.Genomics.2011_PMID.21214954	-1.27622
Early_IRS_2_PLoS.One.2016_PMID.26991655	-0.389323	BASAL_Cluster_BMC.Med.Genomics.2011_PMID.21214954	-0.508622	CIBERSORT_Macrophages_M2_Nat.Methods.2015_PMID.25822800	-0.891667	TCGA_CSF1_response_Immunity.2018_PMID._29628290	-1.242	MacTh1_cluster_Iglesia_CCR.2014_PMID.24916698	-1.54526	MM_Wnt1.Late_Genome.Biol.2013_PMID.24220145	-1.28514
MECM_BMC.Med.Genomics.2011_PMID.21214954	-0.397591	MM_Wnt1.Late_Genome.Biol.2013_PMID.24220145	-0.509398	Murat_G24_J.Clin.Oncol.2008_PMID.18565887	-0.892206	GSEA_PD1_SIGNALING_REACTOME	-1.24465	Verhaak_Stromal_Nat.Commun.2013_PMID.24113773	-1.56143	Fibromatosis_Lab.Invest.2008_PMID.18414401	-1.29977
Immune_Suppression_Kardos_JCI.Insight.2016_PMID.27699256	-0.399317	Stingl_Down_Basal_High_Nat.Cell.Biol.2014_PMID.25173976	-0.511268	HCK_Breast.Cancer.Research.2008_PMID.19272155	-0.892209	CIBERSORT_NK_cells_resting_Nat.Methods.2015_PMID.25822800	-1.24952	CIBERSORT_Monocytes_Nat.Methods.2015_PMID.25822800	-1.56213	Wahl_fSTR_Signature_Cell.Stem.Cell.2012_PMID.22305568	-1.35503
IMMUNE_Bindea_Cell_Lymph_vessels_Immunity.2013_PMID.24138885	-0.400644	Pfefferle2012_Stroma_PMID.25575446	-0.51446	IMMUNE_Bindea_Cell_B_cells_Immunity.2013_PMID.24138885	-0.9094	Verhaak_Immune_Nat.Commun.2013_PMID.24113773	-1.25046	CD103_Positive_Cancer.Cell.2014_PMID.25446897	-1.56549	MIR_200c_Repressed_ONCO.2015_PMID.25746005	-1.39531
MIR_200c_Repressed_ONCO.2015_PMID.25746005	-0.404635	aStr_Lim09_BCR.2015_PMID.25575446	-0.516648	M2_Macrophage_Blood.2006_PMID.16556895	-0.912324	CIBERSORT_T_cells_CD4_memory_activated_Nat.Methods.2015_PMID.25822800	-1.25162	Bcell_Tcell_Cooperation_Cell.2019_PMID.31730857	-1.57176	TCGA.BRCA.1198_COLLAGEN11A_JCI.2020_PMID.32573490	-1.44464
UNC_Scorr_Norm_Correlation_JCO.2009_PMID.19204204	-0.406441	Fibroblasts_MCP_PMID.31942075_PMID.31942077	-0.521567	TCGA_CSF1_response_Immunity.2018_PMID._29628290	-0.915555	MDACC.FNA.1_J.Clin.Oncol.2010_PMID.20805453	-1.25306	Miller_B_P_Metagene_Genome_Biol_2013_PMID.23618380	-1.57594	MET_DOWN_Significant_Genes_LOW_BASALS_1_Genes_JCI.2018_PMID.29480819	-1.5387
Lim2010_Stroma_Adam_PMID.25575446	-0.408903	UNC_Scorr_Norm_Correlation_JCO.2009_PMID.19204204	-0.525173	TLS_tumors_w_TLS_and_CD8_v_CD8alone_PMID.31942071	-0.916898	Bcell_IL10_PLUS_LIN_J_Immunol.2014_PMID.25080484	-1.25751	CIBERSORT_T_cells_gamma_delta_Nat.Methods.2015_PMID.25822800	-1.57775	Lums_HER2E_DOWN_metastatic.signature_JCI.2020_PMID.32573490	-1.6424
MM_Wnt1.Early_Genome.Biol.2013_PMID.24220145	-0.420839	MDACC.FNA.2_J.Clin.Oncol.2010_PMID.20805453	-0.526751	Durvalumab_signature_Higgs_Clin.Cancer.Res.2018_PMID.29716923	-0.918436	aStr_HsEnriched_Refined2_BCR.2015_PMID.25575446	-1.25866	TCGA.BRCA.1198_IMMUNOGLOBULIN_PMID.26451490	-1.57969
MASC_Up_Nat.Med.2009_PMID.19648928	-0.423347	Lim.et.al.2010.Conserved.aMaSC_BCR.2010_PMID.20346151	-0.533217	T_RM_Cell_single_cell_signature_Savas_Nat_Med.2018_PMID.29942092	-0.919658	MET_DOWN_Significant_Genes_LOW_BASALS_1_Genes_JCI.2018_PMID.29480819	-1.26124	CIBERSORT_T_cells_CD8_Nat.Methods.2015_PMID.25822800	-1.58352
Lobular_Carcinoma_In_Situ_J.Pathol.2017_PMID.27861902	-0.423469	aMaSC_HsEnriched_BCR.2015_PMID.25575446	-0.535242	Verhaak_Immune_Nat.Commun.2013_PMID.24113773	-0.924691	IMMUNE_Bindea_Cell_T_cells_Immunity.2013_PMID.24138885	-1.26139	CIBERSORT_B_cells_naive_Nat.Methods.2015_PMID.25822800	-1.58439
REPLICATION_STRESS_UP_SET_Cell.Rep.2018_PMID.29768207	-0.423534	PR_Isoform_Ratio_Up_in_PRA_H_JNCI.2017_PMID.28376177	-0.539234	Tcell_EXH_Memory_CD8_T_cell_a_vs_Naive_CD8_T_cell_Metagene_1_Science.2016_PMID.27789795	-0.924767	Claudin_High_Genome.Biol.2007_PMID.17493263	-1.265	LOBULAR_TCGA_SIGNATURE_Immune_related_Cell.2015_PMID.26451490	-1.58791
TCGA.BRCA.1198_BASAL_JCI.2020_PMID.32573490	-0.428505	Stromal_Up_Nat.Med.2009_PMID.19648928	-0.540263	STAT1_Breast.Cancer.Research.2008_PMID.19272155	-0.930026	IMMUNE_PEREZ_14_JCO.2015_PMID.2560586	-1.26737	TCGA_CSF1_response_Immunity.2018_PMID._29628290	-1.59336
PR_Isoform_Ratio_Up_in_PRA_H_JNCI.2017_PMID.28376177	-0.428633	aMaSC_HsEnriched_Refined1_BCR.2015_PMID.25575446	-0.542791	Bcell_IL10_PLUS_LIN_J_Immunol.2014_PMID.25080484	-0.932365	Bcells_Centrocyte_J.Clin.Oncol.2015_PMID.25800755	-1.27001	T.cells_MCP_PMID.31942075_PMID.31942077	-1.59419
TCGA.BRCA.1198_immune_CTLA4_CXCL_FOXP3_JCI.2020_PMID.32573490	-0.429018	Lobular_Carcinoma_In_Situ_J.Pathol.2017_PMID.27861902	-0.543133	CIBERSORT_T_cells_regulatory_Tregs_Nat.Methods.2015_PMID.25822800	-0.93497	GSEA_GP2_Immune_Tcell_Bcell.r.0.949_PerouLab_Immune_cell_Cluster_BMC_Med_Genomics_2011_PMID.21214954	-1.27445	CTLA4_Single_Gene	-1.59824
Stingl_Down_CLOW_High_Nat.Cell.Biol.2014_PMID.25173976	-0.430854	MM_Myoepithelioma.like_Genome.Biol.2013_PMID.24220145	-0.54349	GSEA_GP2_Immune_Tcell_Bcell.r.0.964_KEGG_HEMATOPOIETIC_CELL_LINEAGE	-0.936788	MNB2_BMC.Med.Genomics.2011_PMID.21214954	-1.27741	CIBERSORT_T_cells_follicular_helper_Nat.Methods.2015_PMID.25822800	-1.6004
REPLICATION_STRESS_POS_Cell.Rep.2018_PMID.29768207	-0.430866	Lim2009_Stroma_Adam_PMID.25575446	-0.546964	Cytolytic_activity_signature_Rooney_Cell.2015_PMID.25594174	-0.938043	Immune_Hot_using_CD8_vs_Cold_PMID.31942071	-1.28074	Murat_G07_J.Clin.Oncol.2008_PMID.18565887	-1.60624
MM_Wnt1.Late_Genome.Biol.2013_PMID.24220145	-0.431104	Wahl_fSTR_Signature_Cell.Stem.Cell.2012_PMID.22305568	-0.548478	Inflammatory_Breast_Cancer_491_IBC_CCR.2013_PMID.23396049	-0.939098	CIBERSORT_Monocytes_Nat.Methods.2015_PMID.25822800	-1.281	Monocytic_lineage_MCP_PMID.31942075_PMID.31942077	-1.61108
IMMUNE_Bindea_Cell_Th1_cells_Immunity.2013_PMID.24138885	-0.431837	GSEA_GP15_EGF_signailng.r.0.936_NAGASHIMA_EGF_SIGNALING_UP	-0.553005	CIBERSORT_NK_cells_resting_Nat.Methods.2015_PMID.25822800	-0.93936	CIBERSORT_NK_cells_activated_Nat.Methods.2015_PMID.25822800	-1.28841	TCGA_LIexpression_score_Immunity.2018_PMID._29628290	-1.6121
CIBERSORT_Mast_cells_resting_Nat.Methods.2015_PMID.25822800	-0.432779	MBASAL_BMC.Med.Genomics.2011_PMID.21214954	-0.556653	MHC_Forero_11_Cancer.Immunol.Res.2016_PMID.26980599	-0.939598	CIBERSORT_Mast_cells_resting_Nat.Methods.2015_PMID.25822800	-1.29033	Tcell_EXH_Memory_CD8_T_cell_a_vs_Naive_CD8_T_cell_Metagene_2_Science.2016_PMID.27789795	-1.61224
IgG_Breast.Cancer.Research.2008_PMID.19272155	-0.435086	Stingl_Day7_Downregulated_Nat.Cell.Biol.2014_PMID.25173976	-0.560882	CIBERSORT_NK_cells_activated_Nat.Methods.2015_PMID.25822800	-0.941007	Bcells_Memory_J.Clin.Oncol.2015_PMID.25800755	-1.29076	CIBERSORT_T_cells_CD4_memory_activated_Nat.Methods.2015_PMID.25822800	-1.61865
Up_regulated_upon_N_RAS_repression_Cell_Rep.2015_PMID.26166574	-0.436411	Lim2009_MaSC_Adam_PMID.25575446	-0.571541	TCGA.BRCA.1198_immune_CD8_GZMK_JCI.2020_PMID.32573490	-0.947046	Mouse_Human_ImmuneProfiles_SHAY_M_H_Induced_in_MO_PNAS.2013_PMID.23382184_	-1.29167	Tcell_EXH_Memory_CD8_T_cell_a_vs_Naive_CD8_T_cell_Metagene_3_Science.2016_PMID.27789795	-1.62041
IMMUNE_Bindea_Cell_Mast_cells_Immunity.2013_PMID.24138885	-0.437411	MM_DMBAwnt_1pFDR_UP_Genome.Biology.2007_PMID.17493263	-0.571625	T.cells_MCP_PMID.31942075_PMID.31942077	-0.953904	MHC.II_Breast.Cancer.Research.2008_PMID.19272155	-1.30428	TCGA.BRCA.1198_immune_CD8_GZMK_JCI.2020_PMID.32573490	-1.62392
Shehata2012_Stroma_PMID.25575446	-0.438077	TCGA.BRCA.1198_TP63_JCI.2020_PMID.32573490	-0.571779	CIBERSORT_Dendritic_cells_resting_Nat.Methods.2015_PMID.25822800	-0.95435	YALE_PIK3CA_Pathway_Ann.Oncol.2017_PMID.28177460	-1.32086	Down_regulated_upon_N_RAS_repression_Cell_Rep.2015_PMID.26166574	-1.62586
BASAL_Cluster_BMC.Med.Genomics.2011_PMID.21214954	-0.438896	GSEA_GP4_MES_ECM.r.0.954_PerouLab_HS_Red7_BMC_Med_Genomics_2011_PMID.21214954	-0.574442	LCK_Breast.Cancer.Research.2008_PMID.19272155	-0.96076	CTLA4_Single_Gene	-1.32094	M2_Macrophage_Blood.2006_PMID.16556895	-1.63174
LOBULAR_TCGA_SUBTYPE_Proliferative_Cell.2015_PMID.26451490	-0.440256	TCGA.BRCA.1198_immune_FOS_JUN_IL6_JCI.2020_PMID.32573490	-0.586164	CIBERSORT_T_cells_gamma_delta_Nat.Methods.2015_PMID.25822800	-0.96156	Parity_signature_Troester_251_BCR.2014_PMID.25005139	-1.32479	IMMUNE_Bindea_Cell_T_cells_Immunity.2013_PMID.24138885	-1.63561
Miller_B_P_Metagene_Genome_Biol_2013_PMID.23618380	-0.441725	MM_Class8_Genome.Biol.2013_PMID.24220145	-0.58647	Duke_Module11_ifng_Mike_PMID.20335537	-0.962421	IMMUNE_Bindea_Cell_Macrophages_Immunity.2013_PMID.24138885	-1.32517	CIBERSORT_T_cells_CD4_memory_resting_Nat.Methods.2015_PMID.25822800	-1.63664
Murat_G07_J.Clin.Oncol.2008_PMID.18565887	-0.443952	Fibroblast_Cluster_BMC.Med.Genomics.2011_PMID.21214954	-0.613653	Tcell_EXH_Exhausted_CD8_T_cell_vs_Naive_CD8_T_cell_Metagene_3_Science.2016_PMID.27789795	-0.963213	DAN_ImmuneActive_Cell.2019_PMID.31730857	-1.32521	MCD3_CD8_BMC.Med.Genomics.2011_PMID.21214954	-1.64479
MM_Claudinlow_Genome.Biol.2013_PMID.24220145	-0.444939	LOBULAR_TCGA_SUBTYPE_Reactive_like_Cell.2015_PMID.26451490	-0.617632	CIBERSORT_T_cells_CD4_memory_resting_Nat.Methods.2015_PMID.25822800	-0.964004	IMMUNE_Bindea_Cell_Blood_vessels_Immunity.2013_PMID.24138885	-1.32968	T_Cell_cluster_Iglesia_CCR.2014_PMID.24916698	-1.64536
Pcorr_squamoid_PLOS.2012_PMID.22590557	-0.447156	Troester_Wound_Signature_Clin.Cancer.Res.2009_PMID.19887484	-0.618463	Parity_signature_Troester_251_BCR.2014_PMID.25005139	-0.965681	Parity_signature_Troester_40_BCR.2014_PMID.25005139	-1.33025	CIBERSORT_Macrophages_M1_Nat.Methods.2015_PMID.25822800	-1.64669
MDSC_Neutrophil_Youn_J_Leukoc_Biol.2012_PMID.21954284	-0.450456	Lim2010_MaSC_Adam_PMID.25575446	-0.620178	MCD3_CD8_BMC.Med.Genomics.2011_PMID.21214954	-0.966247	CIBERSORT_Macrophages_M1_Nat.Methods.2015_PMID.25822800	-1.3332	CIBERSORT_B_cells_memory_Nat.Methods.2015_PMID.25822800	-1.65259
Stingl_Down_Basal_High_Nat.Cell.Biol.2014_PMID.25173976	-0.452057	FOS_JUN_Cluster_BMC.Med.Genomics.2011_PMID.21214954	-0.63566	CD8_cluster_Iglesia_CCR.2014_PMID.24916698	-0.967413	MDSC_tumor_Schlecker_J.Immunol.2012_PMID.23152559	-1.33495	CD8_cluster_Iglesia_CCR.2014_PMID.24916698	-1.65445
Scorr_EMAT1_Correlation_BCR.2020_PMID.32641077	-0.457838	Fibromatosis_Lab.Invest.2008_PMID.18414401	-0.640675	Tcell_EXH_Effector_CD8_T_cell_at_day_8_p.i_Armstrong_vs_Naive_CD8_T_cell_Metagene_1_Science.2016_PMID.27789795	-0.968711	Down_regulated_upon_N_RAS_repression_Cell_Rep.2015_PMID.26166574	-1.33561	Stromal_Inflammation_J.Pathol.2017_PMID.27861902	-1.65679
aMaSC_HsEnriched_BCR.2015_PMID.25575446	-0.461183	Pcorr_Breast2Lung_LM2_Correlation_Nature.2005_PMID.16049480	-0.65197	T_Cell_cluster_Iglesia_CCR.2014_PMID.24916698	-0.969061	TCGA_TGFB_score_21050467_Immunity.2018_PMID._29628290	-1.33941	IMMUNE_Bindea_Cell_NK_CD56dim_cells_Immunity.2013_PMID.24138885	-1.65728
Lim2009_MaSC_Adam_PMID.25575446	-0.46335	TCGA.BRCA.1198_UNKNOWN2_JCI.2020_PMID.32573490	-0.681938	CIBERSORT_T_cells_CD8_Nat.Methods.2015_PMID.25822800	-0.971168	TCGA.BRCA.1198_immune_CD34_TIE1_JCI.2020_PMID.32573490	-1.35987	CIBERSORT_NK_cells_activated_Nat.Methods.2015_PMID.25822800	-1.66468
Lim.et.al.2010.Conserved.aMaSC_BCR.2010_PMID.20346151	-0.46903	Scorr_EMAT2_Correlation_BCR.2020_PMID.32641077	-0.745935	LOBULAR_TCGA_SIGNATURE_Immune_related_Cell.2015_PMID.26451490	-0.971959	TCGA.BRCA.1198_immune_CTLA4_CXCL_FOXP3_JCI.2020_PMID.32573490	-1.36273	IMMUNE_PEREZ_14_JCO.2015_PMID.2560586	-1.66689
TCGA_TGFB_score_21050467_Immunity.2018_PMID._29628290	-0.469706	MET_DOWN_Significant_Genes_LOW_BASALS_1_Genes_JCI.2018_PMID.29480819	-0.795977	Down_regulated_upon_N_RAS_repression_Cell_Rep.2015_PMID.26166574	-0.973278	MERCK_Immune_signature_Science.2018_PMID.30309915	-1.36872	Tcell_EXH_Memory_CD8_T_cell_a_vs_Naive_CD8_T_cell_Metagene_1_Science.2016_PMID.27789795	-1.66931
aStr_HsEnriched_BCR.2015_PMID.25575446	-0.471524	TCGA.BRCA.1198_COLLAGEN11A_JCI.2020_PMID.32573490	-0.80515	TCGA.BRCA.1198_IMMUNE1_JCI.2020_PMID.32573490	-0.973381	IMMUNE_Bindea_Cell_Lymph_vessels_Immunity.2013_PMID.24138885	-1.37247	TCGA.BRCA.1198_IMMUNE1_JCI.2020_PMID.32573490	-1.66948
CIBERSORT_Mast_cells_activated_Nat.Methods.2015_PMID.25822800	-0.472318	Lums_HER2E_DOWN_metastatic.signature_JCI.2020_PMID.32573490	-1.43009	CTLA4_Single_Gene	-0.977295	Immune_Suppression_Kardos_JCI.Insight.2016_PMID.27699256	-1.3729	IgG_Breast.Cancer.Research.2008_PMID.19272155	-1.68529
MM_DMBAwnt_1pFDR_UP_Genome.Biology.2007_PMID.17493263	-0.472482			IMMUNE_Bindea_Cell_T_cells_Immunity.2013_PMID.24138885	-0.981792	MDACC.FNA.2_J.Clin.Oncol.2010_PMID.20805453	-1.37608	IGG_Cluster_BMC.Med.Genomics.2011_PMID.21214954	-1.68595
MBASAL_BMC.Med.Genomics.2011_PMID.21214954	-0.472965			GSEA_HDAC_TARGETS_DN_HELLER	-0.984348	GSEA_BIOCARTA_CTLA4_PATHWAY	-1.37813	Immune_High_In_Response_MCP_TLS_Melanoma_PMID.31942075	-1.69605
Stromal_Signature_Nat.Med.2008_PMID.18438415	-0.477363			Stromal_Signature_Nat.Med.2008_PMID.18438415	-0.984746	LOBULAR_TCGA_SIGNATURE_Immune_related_Cell.2015_PMID.26451490	-1.38577	Miller_T_NK_Metagene_Genome_Biol_2013_PMID.23618380	-1.69617
aStr_Lim09_BCR.2015_PMID.25575446	-0.478624			TCGA.BRCA.1198_immune_HLA_D_JCI.2020_PMID.32573490	-0.98897	MM_Claudinlow_Genome.Biol.2013_PMID.24220145	-1.38985	LCK_Breast.Cancer.Research.2008_PMID.19272155	-1.70211
TCGA.BRCA.1198_TP63_JCI.2020_PMID.32573490	-0.479527			MDACC.FNA.1_J.Clin.Oncol.2010_PMID.20805453	-0.990065	MM_Potluck_1pFDR_UP_Genome.Biology.2007_PMID.17493263	-1.3935	Miller_M_D_Metagene_Genome_Biol_2013_PMID.23618380	-1.70314
LOBULAR_TCGA_SUBTYPE_Reactive_like_Cell.2015_PMID.26451490	-0.479657			TCGA_LIexpression_score_Immunity.2018_PMID._29628290	-0.991701	Tcell_EXH_Exhausted_CD8_T_cell_vs_Naive_CD8_T_cell_Metagene_1_Science.2016_PMID.27789795	-1.40803	MDACC.FNA.1_J.Clin.Oncol.2010_PMID.20805453	-1.71123
aStr_HsEnriched_Refined2_BCR.2015_PMID.25575446	-0.480708			IMMUNE_PEREZ_87_JCO.2015_PMID.2560586	-0.993603	Murat_G07_J.Clin.Oncol.2008_PMID.18565887	-1.42144	Parity_signature_Troester_251_BCR.2014_PMID.25005139	-1.71357
EMT_UP_Weinberg_PNAS.2010_PMID.20713713	-0.481455			Miller_M_D_Metagene_Genome_Biol_2013_PMID.23618380	-0.995829	Tcell_EXH_Memory_CD8_T_cell_a_vs_Naive_CD8_T_cell_Metagene_3_Science.2016_PMID.27789795	-1.45527	MERCK_Immune_signature_Science.2018_PMID.30309915	-1.71668
Pfefferle2012_Stroma_PMID.25575446	-0.48737			Immune_Hot_using_CD8_vs_Cold_PMID.31942071	-0.996145	Verhaak_Stromal_Nat.Commun.2013_PMID.24113773	-1.45601	MHC_Forero_11_Cancer.Immunol.Res.2016_PMID.26980599	-1.71669
aMaSC_HsEnriched_Refined1_BCR.2015_PMID.25575446	-0.488009			IgG_Breast.Cancer.Research.2008_PMID.19272155	-0.997087	Monocytic_lineage_MCP_PMID.31942075_PMID.31942077	-1.45739	TLS_New_9Gene_Signature_PMID.31942071	-1.71973
CTLA4_Single_Gene	-0.493845			Miller_B_P_Metagene_Genome_Biol_2013_PMID.23618380	-0.99732	Tcell_EXH_Memory_CD8_T_cell_a_vs_Naive_CD8_T_cell_Metagene_1_Science.2016_PMID.27789795	-1.46683	DAN_ImmuneActive_Cell.2019_PMID.31730857	-1.7327
Fibroblasts_MCP_PMID.31942075_PMID.31942077	-0.49732			IMMUNE_Bindea_Cell_Macrophages_Immunity.2013_PMID.24138885	-0.997658	IMMUNE_Bindea_Cell_DC_Immunity.2013_PMID.24138885	-1.47614	TCGA.BRCA.1198_immune_GIMAP_IL16_JCI.2020_PMID.32573490	-1.73443
MM_Myoepithelioma.like_Genome.Biol.2013_PMID.24220145	-0.498065			GSEA_GP2_Immune_Tcell_Bcell.r.0.949_PerouLab_Immune_cell_Cluster_BMC_Med_Genomics_2011_PMID.21214954	-1.00284	Stromal_Signature_Nat.Med.2008_PMID.18438415	-1.48853	TCGA.BRCA.1198_immune_HLA_D_JCI.2020_PMID.32573490	-1.73444
Bcell_IL10_MINUS_LIN_J_Immunol.2014_PMID.25080484	-0.500099			CIBERSORT_T_cells_follicular_helper_Nat.Methods.2015_PMID.25822800	-1.00326	Tcell_EXH_Memory_CD8_T_cell_a_vs_Naive_CD8_T_cell_Metagene_2_Science.2016_PMID.27789795	-1.49234	Endothelial_cells_MCP_PMID.31942075_PMID.31942077	-1.73822
Bcells_Centrocyte_J.Clin.Oncol.2015_PMID.25800755	-0.501028			IGG_Cluster_BMC.Med.Genomics.2011_PMID.21214954	-1.01571	Inflammatory_Breast_Cancer_491_IBC_CCR.2013_PMID.23396049	-1.50313	Claudin_High_Genome.Biol.2007_PMID.17493263	-1.74216
MM_Squamous.like_Genome.Biol.2013_PMID.24220145	-0.504302			T_cell_activation_PMID.31942077	-1.01835	CIBERSORT_Dendritic_cells_activated_Nat.Methods.2015_PMID.25822800	-1.512	CIBERSORT_NK_cells_resting_Nat.Methods.2015_PMID.25822800	-1.74943
Lim2009_Stroma_Adam_PMID.25575446	-0.505895			TCGA.BRCA.1198_IMMUNOGLOBULIN_PMID.26451490	-1.03334	Tcell_EXH_Effector_CD8_T_cell_at_day_8_p.i_Armstrong_vs_Naive_CD8_T_cell_Metagene_1_Science.2016_PMID.27789795	-1.53392	Immune_Hot_using_CD8_vs_Cold_PMID.31942071	-1.74955
TCGA.BRCA.1198_immune_FOS_JUN_IL6_JCI.2020_PMID.32573490	-0.506266			Monocytic_lineage_MCP_PMID.31942075_PMID.31942077	-1.04023	MIR_200c_Induced_ONCO.2015_PMID.25746005	-1.54391	Bcells_Plasmablast_J.Clin.Oncol.2015_PMID.25800755	-1.75004
Stromal_Up_Nat.Med.2009_PMID.19648928	-0.511498			TCGA.BRCA.1198_immune_CTLA4_CXCL_FOXP3_JCI.2020_PMID.32573490	-1.04209	Bcells_Plasmablast_J.Clin.Oncol.2015_PMID.25800755	-1.5461	GSEA_BIOCARTA_CTLA4_PATHWAY	-1.75729
MDACC.FNA.2_J.Clin.Oncol.2010_PMID.20805453	-0.516066			CIBERSORT_T_cells_CD4_memory_activated_Nat.Methods.2015_PMID.25822800	-1.04302	Tcell_EXH_Exhausted_CD8_T_cell_vs_Naive_CD8_T_cell_Metagene_3_Science.2016_PMID.27789795	-1.55112	IMMUNE_PEREZ_87_JCO.2015_PMID.2560586	-1.76156
Scorr_EMAT2_Correlation_BCR.2020_PMID.32641077	-0.5182			DAN_ImmuneActive_Cell.2019_PMID.31730857	-1.05248	CIBERSORT_Dendritic_cells_resting_Nat.Methods.2015_PMID.25822800	-1.56295	Stromal_Signature_Nat.Med.2008_PMID.18438415	-1.76534
Wahl_fSTR_Signature_Cell.Stem.Cell.2012_PMID.22305568	-0.519502			TNBC_Clinically_Relevant_Good.26_BCR.2011_PMID.21978456	-1.06279	GSEA_HDAC_TARGETS_DN_HELLER	-1.62646	Verhaak_Immune_Nat.Commun.2013_PMID.24113773	-1.76583
GSEA_GP15_EGF_signailng.r.0.936_NAGASHIMA_EGF_SIGNALING_UP	-0.522042			Stromal_Inflammation_J.Pathol.2017_PMID.27861902	-1.06362	GSEA_GP2_Immune_Tcell_Bcell.r.0.964_KEGG_HEMATOPOIETIC_CELL_LINEAGE	-1.65641	GSEA_GP2_Immune_Tcell_Bcell.r.0.949_PerouLab_Immune_cell_Cluster_BMC_Med_Genomics_2011_PMID.21214954	-1.76704
Lim2010_MaSC_Adam_PMID.25575446	-0.522471			Immune_High_In_Response_MCP_TLS_Melanoma_PMID.31942075	-1.06772	Mouse_Human_ImmuneProfiles_SHAY_M_H_Induced_in_NK_PNAS.2013_PMID.23382184_	-1.67788	TLS_tumors_w_TLS_and_CD8_v_CD8alone_PMID.31942071	-1.77929
Pcorr_Breast2Lung_LM2_Correlation_Nature.2005_PMID.16049480	-0.530137			Immune_Suppression_Kardos_JCI.Insight.2016_PMID.27699256	-1.07172			Tcell_EXH_Exhausted_CD8_T_cell_vs_Naive_CD8_T_cell_Metagene_3_Science.2016_PMID.27789795	-1.79259
Stingl_Day7_Downregulated_Nat.Cell.Biol.2014_PMID.25173976	-0.530262			GSEA_PD1_SIGNALING_REACTOME	-1.08078			GSEA_PD1_SIGNALING_REACTOME	-1.80896
FOS_JUN_Cluster_BMC.Med.Genomics.2011_PMID.21214954	-0.534871			MHC.II_Breast.Cancer.Research.2008_PMID.19272155	-1.08705			Tcell_EXH_Effector_CD8_T_cell_at_day_8_p.i_Armstrong_vs_Naive_CD8_T_cell_Metagene_1_Science.2016_PMID.27789795	-1.81175
Verhaak_Stromal_Nat.Commun.2013_PMID.24113773	-0.536223			CIBERSORT_Macrophages_M1_Nat.Methods.2015_PMID.25822800	-1.08859			Mouse_Human_ImmuneProfiles_SHAY_M_H_Induced_in_NK_PNAS.2013_PMID.23382184_	-1.81635
MM_Class8_Genome.Biol.2013_PMID.24220145	-0.542748			GSEA_BIOCARTA_CTLA4_PATHWAY	-1.09301			CIBERSORT_Dendritic_cells_resting_Nat.Methods.2015_PMID.25822800	-1.81935
GSEA_GP4_MES_ECM.r.0.954_PerouLab_HS_Red7_BMC_Med_Genomics_2011_PMID.21214954	-0.548034			MERCK_Immune_signature_Science.2018_PMID.30309915	-1.0991			TCGA.BRCA.1198_immune_CD34_TIE1_JCI.2020_PMID.32573490	-1.84243
Troester_Wound_Signature_Clin.Cancer.Res.2009_PMID.19887484	-0.569999			CIBERSORT_Dendritic_cells_activated_Nat.Methods.2015_PMID.25822800	-1.10942			MHC.II_Breast.Cancer.Research.2008_PMID.19272155	-1.85171
Fibroblast_Cluster_BMC.Med.Genomics.2011_PMID.21214954	-0.580908							MIR_200c_Induced_ONCO.2015_PMID.25746005	-1.86005
Fibromatosis_Lab.Invest.2008_PMID.18414401	-0.593554							Parity_signature_Troester_40_BCR.2014_PMID.25005139	-1.87364
TCGA.BRCA.1198_UNKNOWN2_JCI.2020_PMID.32573490	-0.665518							IMMUNE_Bindea_Cell_DC_Immunity.2013_PMID.24138885	-1.8901
MET_DOWN_Significant_Genes_LOW_BASALS_1_Genes_JCI.2018_PMID.29480819	-0.734722							CIBERSORT_Dendritic_cells_activated_Nat.Methods.2015_PMID.25822800	-1.90103
TCGA.BRCA.1198_COLLAGEN11A_JCI.2020_PMID.32573490	-0.766123							GSEA_GP2_Immune_Tcell_Bcell.r.0.964_KEGG_HEMATOPOIETIC_CELL_LINEAGE	-2.08272
Lums_HER2E_DOWN_metastatic.signature_JCI.2020_PMID.32573490	-1.14514							IMMUNE_Bindea_Cell_Blood_vessels_Immunity.2013_PMID.24138885	-2.09603
								Inflammatory_Breast_Cancer_491_IBC_CCR.2013_PMID.23396049	-2.11897
								GSEA_HDAC_TARGETS_DN_HELLER	-2.13606

## Sheet: Significant DGE mod Organ met
AURORA-RAP-GEICAM_SAM_UP&DOWN_modules_List_LiverMet.vs.BrainMet_FDR0	AURORA-RAP-GEICAM_SAM_UP&DOWN_Fold_change_LiverMet.vs.BrainMet_FDR0	AURORA-RAP-GEICAM_SAM_UP&DOWN_modules_List_LiverMet.vs.LungMet_FDR0	AURORA-RAP-GEICAM_SAM_UP&DOWN_Fold_change_LiverMet.vs.LungMet_FDR0	AURORA-RAP-GEICAM_SAM_UP&DOWN_modules_List_LiverMet.vs.LNMet_FDR0	AURORA-RAP-GEICAM_SAM_UP&DOWN_Fold_change_LiverMet.vs.LNMet_FDR0	AURORA-RAP-GEICAM_SAM_UP&DOWN_modules_List_LungMet.vs.BrainMet_FDR0	AURORA-RAP-GEICAM_SAM_UP&DOWN_Fold_change_LungMet.vs.BrainMet_FDR0	AURORA-RAP-GEICAM_SAM_UP&DOWN_modules_BrainMet.vs.LNMet_FDR0	AURORA-RAP-GEICAM_SAM_UP&DOWN_Fold_change_BrainMet.vs.LNMet_FDR0	AURORA-RAP-GEICAM_SAM_UP&DOWN_modules_LungMet.vs.LNMet_FDR0	AURORA-RAP-GEICAM_SAM_UP&DOWN_Fold_change_LungMet.vs.LNMet_FDR0
IMMUNE_Bindea_Cell_Tgd_Immunity.2013_PMID.24138885	4.57958	Lung.WNT.DiMeo_Cancer.Res.2009_PMID.19549913	2.3913	B_lineage_MCP_PMID.31942075_PMID.31942077	3.13834	TCGA.BRCA.1198_Chromogranin_JCI.2020_PMID.32573490	3.72988	IMMUNE_PEREZ_14_JCO.2015_PMID.2560586	3.27469	TCGA.BRCA.1198_immune_CD19_JCI.2020_PMID.32573490	2.41098
TCGA_Tgd_cells_Immunity.2018_PMID._29628290	4.57958	Endothelial_cells_MCP_PMID.31942075_PMID.31942077	2.12843	CORE_B_CELL_signatures_Garber_Cell.Mol.Gastroenterol.Hepatol.2017_PMID.28508029	3.10228	Chromogramin_BMC.Med.Genomics.2011_PMID.21214954	3.09549	TLS_tumors_w_TLS_and_CD8_v_CD8alone_PMID.31942071	3.13247	B_Cell_cluster_Iglesia_CCR.2014_PMID.24916698	2.27801
GSEA_GP13_Neural_signailng.r.0.959_MODULE_100	3.49958	IMMUNE_Bindea_Cell_Blood_vessels_Immunity.2013_PMID.24138885	2.07244	CIBERSORT_B_cells_memory_Nat.Methods.2015_PMID.25822800	2.90866	IMMUNE_Bindea_Cell_Tgd_Immunity.2013_PMID.24138885	3.0784	CIBERSORT_B_cells_naive_Nat.Methods.2015_PMID.25822800	3.06299	B_lineage_MCP_PMID.31942075_PMID.31942077	2.31125
Murat_G18_J.Clin.Oncol.2008_PMID.18565887	3.15249	Lim2009_MaSC_Adam_PMID.25575446	2.01342	CIBERSORT_B_cells_naive_Nat.Methods.2015_PMID.25822800	2.88859	TCGA_Tgd_cells_Immunity.2018_PMID._29628290	3.0784	CIBERSORT_B_cells_memory_Nat.Methods.2015_PMID.25822800	3.03743	Bcell_Tcell_Cooperation_Cell.2019_PMID.31730857	1.95828
GSEA_GP13_Neural_signailng.r.0.894_NERVOUS_SYSTEM_DEVELOPMENT	3.0561	CD34_CD36_Cluster_BMC.Med.Genomics.2011_PMID.21214954	2.00282	B_Cell_cluster_Iglesia_CCR.2014_PMID.24916698	2.8856	GSEA_GP13_Neural_signailng.r.0.959_MODULE_100	2.94152	IMMUNE_Bindea_Cell_CD8_T_cells_Immunity.2013_PMID.24138885	2.99384	CIBERSORT_B_cells_memory_Nat.Methods.2015_PMID.25822800	2.17769
Wahl_fMasC_Signature_Cell.Stem.Cell.2012_PMID.22305568	2.89761	MVEGFC_BMC.Med.Genomics.2011_PMID.21214954	1.9932	TCGA.BRCA.1198_immune_CD19_JCI.2020_PMID.32573490	2.82142	Pcorr_classical_CCR.2010_PMID.20643781	2.4174	Mouse_Human_ImmuneProfiles_SHAY_M_H_Induced_in_T_PNAS.2013_PMID.23382184_	2.99243	CIBERSORT_B_cells_naive_Nat.Methods.2015_PMID.25822800	2.14699
Chromogramin_BMC.Med.Genomics.2011_PMID.21214954	2.79345	MM_Claudinlow_Genome.Biol.2013_PMID.24220145	1.98862	IMMUNE_Bindea_Cell_B_cells_Immunity.2013_PMID.24138885	2.80002	IMMUNE_Bindea_Cell_Blood_vessels_Immunity.2013_PMID.24138885	0.30184	CIBERSORT_T_cells_CD4_naive_Nat.Methods.2015_PMID.25822800	2.89354	TLS_Hallmark_Gene_Signature_PMID.31942071	2.08398
TCGA.BRCA.1198_Chromogranin_JCI.2020_PMID.32573490	2.70395	CIBERSORT_Mast_cells_resting_Nat.Methods.2015_PMID.25822800	1.96605	Mouse_Human_ImmuneProfiles_SHAY_M_H_Induced_in_B_PNAS.2013_PMID.23382184_	2.68399	PDGFRA_Single_Gene	0.309908	CIBERSORT_T_cells_CD4_memory_resting_Nat.Methods.2015_PMID.25822800	2.88766	IMMUNE_Bindea_Cell_B_cells_Immunity.2013_PMID.24138885	1.88794
Spike2012_fMaSC_PMID.25575446	2.37346	IMMUNE_Bindea_Cell_pDC_Immunity.2013_PMID.24138885	1.96012	Bcell_Tcell_Cooperation_Cell.2019_PMID.31730857	2.61425	TCGA.BRCA.1198_immune_CD34_TIE1_JCI.2020_PMID.32573490	0.342414	MCD3_CD8_BMC.Med.Genomics.2011_PMID.21214954	2.88459	CORE_B_CELL_signatures_Garber_Cell.Mol.Gastroenterol.Hepatol.2017_PMID.28508029	1.98917
LOBULAR_TCGA_SUBTYPE_Reactive_like_Cell.2015_PMID.26451490	2.33875	TCGA.BRCA.1198_immune_CD34_TIE1_JCI.2020_PMID.32573490	1.92224	IGG_Cluster_BMC.Med.Genomics.2011_PMID.21214954	2.53595	Endothelial_cells_MCP_PMID.31942075_PMID.31942077	0.354139	TCGA.BRCA.1198_immune_CD19_JCI.2020_PMID.32573490	2.86748	TLS_Known_MARKERS_PMID.31942071	1.90584
MM_Wnt1.Late_Genome.Biol.2013_PMID.24220145	2.28387	Vascular.Content_Clin.Exp.Metastasis.2014_PMID.23975155	1.91425	MCD3_CD8_BMC.Med.Genomics.2011_PMID.21214954	2.51969	MProtocadherin_BMC.Med.Genomics.2011_PMID.21214954	0.365236	CIBERSORT_T_cells_follicular_helper_Nat.Methods.2015_PMID.25822800	2.86504	CIBERSORT_T_cells_follicular_helper_Nat.Methods.2015_PMID.25822800	1.84944
High_In_No_Response_MCP_TLS_Melanoma_PMID.31942075	2.2725	CIBERSORT_Mast_cells_activated_Nat.Methods.2015_PMID.25822800	1.90449	TLS_tumors_w_TLS_and_CD8_v_CD8alone_PMID.31942071	2.46217	Neutrophils_MCP_PMID.31942075_PMID.31942077	0.37529	CORE_B_CELL_signatures_Garber_Cell.Mol.Gastroenterol.Hepatol.2017_PMID.28508029	2.85313	TLS_tumors_w_TLS_and_CD8_v_CD8alone_PMID.31942071	1.91777
ACTIVATED_CANCER_CELL_SIGNATURE_Nat.Cell.Biol.2019_PMID.31263265	2.15699	Troester_Wound_Signature_Clin.Cancer.Res.2009_PMID.19887484	1.90448	CIBERSORT_T_cells_follicular_helper_Nat.Methods.2015_PMID.25822800	2.45318	Mouse_Human_ImmuneProfiles_SHAY_M_H_Induced_in_NK_PNAS.2013_PMID.23382184_	0.400173	TLS_Hallmark_Gene_Signature_PMID.31942071	2.85183	TCGA.BRCA.1198_IMMUNE1_JCI.2020_PMID.32573490	1.6482
Pcorr_Hypoxia_Low_Correlation_PLoS.Med.2006_PMID.16417408	2.11325	MECM_BMC.Med.Genomics.2011_PMID.21214954	1.89859	CIBERSORT_Plasma_cells_Nat.Methods.2015_PMID.25822800	2.44488	CIBERSORT_Eosinophils_Nat.Methods.2015_PMID.25822800	0.401378	TLS_Known_MARKERS_PMID.31942071	2.84555	Mouse_Human_ImmuneProfiles_SHAY_M_H_Induced_in_B_PNAS.2013_PMID.23382184_	1.94977
Lim2009_MaSC_Adam_PMID.25575446	2.09828	MDSC_Neutrophil_Youn_J_Leukoc_Biol.2012_PMID.21954284	1.89711	CIBERSORT_T_cells_CD4_naive_Nat.Methods.2015_PMID.25822800	2.4298	CIBERSORT_Mast_cells_activated_Nat.Methods.2015_PMID.25822800	0.405817	IMMUNE_Bindea_Cell_T_cells_Immunity.2013_PMID.24138885	2.8315	MCD3_CD8_BMC.Med.Genomics.2011_PMID.21214954	1.86244
fMaSC.refined1_PMID.25575446	2.03128	MM_Wnt1.Early_Genome.Biol.2013_PMID.24220145	1.89329	TCGA.BRCA.1198_IMMUNE1_JCI.2020_PMID.32573490	2.42974	TCGA.BRCA.1198_UNKNOWN2_JCI.2020_PMID.32573490	0.407855	Mouse_Human_ImmuneProfiles_SHAY_M_H_Induced_in_B_PNAS.2013_PMID.23382184_	2.82306	CD103_Positive_Cancer.Cell.2014_PMID.25446897	1.82506
Pcorr_classical_CCR.2010_PMID.20643781	2.01886	Verhaak_Stromal_Nat.Commun.2013_PMID.24113773	1.89208	TCGA_LIexpression_score_Immunity.2018_PMID._29628290	2.37215	CIBERSORT_Mast_cells_resting_Nat.Methods.2015_PMID.25822800	0.409461	IMMUNE_PEREZ_87_JCO.2015_PMID.2560586	2.81682	TCGA_LIexpression_score_Immunity.2018_PMID._29628290	1.76452
UNC_Scorr_Basal_Correlation_JCO.2009_PMID.19204204	1.99215	TCGA.BRCA.1198_UNKNOWN3_JCI.2020_PMID.32573490	1.883	CIBERSORT_T_cells_regulatory_Tregs_Nat.Methods.2015_PMID.25822800	2.3537	IMMUNE_Bindea_Cell_Neutrophils_Immunity.2013_PMID.24138885	0.422139	CIBERSORT_T_cells_CD8_Nat.Methods.2015_PMID.25822800	2.81221	TLS_New_9Gene_Signature_PMID.31942071	1.92395
LOBULAR_TCGA_SIGNATURE_Reactive_like_Cell.2015_PMID.26451490	1.97587	Lim.et.al.2010.Conserved.aMaSC_BCR.2010_PMID.20346151	1.87482	Miller_T_NK_Metagene_Genome_Biol_2013_PMID.23618380	2.34944	Tcell_EXH_Exhausted_CD8_T_cell_vs_Naive_CD8_T_cell_Metagene_3_Science.2016_PMID.27789795	0.425932	TCGA_LIexpression_score_Immunity.2018_PMID._29628290	2.79885	IMS_Score_Clin.Cancer.Res.2018_PMID.29921729	1.63659
REPLICATION_STRESS_MODEL_Cell.Rep.2018_PMID.29768207	1.9638	MASC_Up_Nat.Med.2009_PMID.19648928	1.87264	T.cells_MCP_PMID.31942075_PMID.31942077	2.3405	MDACC.FNA.2_J.Clin.Oncol.2010_PMID.20805453	0.439158	B_lineage_MCP_PMID.31942075_PMID.31942077	2.77459	IMMUNE_Bindea_Cell_TReg_Immunity.2013_PMID.24138885	1.78928
Her2_Basal_JCI.2020_PMID.32573490	1.90668	aStr_HsEnriched_Refined2_BCR.2015_PMID.25575446	1.85555	Mouse_Human_ImmuneProfiles_SHAY_M_H_Induced_in_T_PNAS.2013_PMID.23382184_	2.31856	Verhaak_Stromal_Nat.Commun.2013_PMID.24113773	0.449481	CIBERSORT_NK_cells_resting_Nat.Methods.2015_PMID.25822800	2.77238	CIBERSORT_Plasma_cells_Nat.Methods.2015_PMID.25822800	1.68637
Lim2010_MaSC_Adam_PMID.25575446	1.90091	IMMUNE_Bindea_Cell_Mast_cells_Immunity.2013_PMID.24138885	1.85218	IMMUNE_PEREZ_14_JCO.2015_PMID.2560586	2.3184	IMMUNE_Bindea_Cell_Normal_mucosa_Immunity.2013_PMID.24138885	0.449736	Miller_T_NK_Metagene_Genome_Biol_2013_PMID.23618380	2.72854	CIBERSORT_T_cells_CD4_naive_Nat.Methods.2015_PMID.25822800	1.77684
BASAL_Cluster_BMC.Med.Genomics.2011_PMID.21214954	1.88809	BASAL_Cluster_BMC.Med.Genomics.2011_PMID.21214954	1.84522	TLS_Known_MARKERS_PMID.31942071	2.30818	IMMUNE_Bindea_Cell_CD8_T_cells_Immunity.2013_PMID.24138885	0.450355	CD8_cluster_Iglesia_CCR.2014_PMID.24916698	2.72786	IGG_Cluster_BMC.Med.Genomics.2011_PMID.21214954	1.59836
TCGA.BRCA.1198_BASAL_JCI.2020_PMID.32573490	1.87175	Bcells_Memory_J.Clin.Oncol.2015_PMID.25800755	1.84287	IMMUNE_PEREZ_87_JCO.2015_PMID.2560586	2.30355	GSEA_GP2_Immune_Tcell_Bcell.r.0.964_KEGG_HEMATOPOIETIC_CELL_LINEAGE	0.452316	CIBERSORT_NK_cells_activated_Nat.Methods.2015_PMID.25822800	2.71541	T_regulatory_cell_2gene_PMID.31942077	1.73573
Stingl_Down_Basal_High_Nat.Cell.Biol.2014_PMID.25173976	1.79116	METAPLASTIC_Up_CanRes.2009_PMID.19435916	1.83012	CIBERSORT_T_cells_CD4_memory_activated_Nat.Methods.2015_PMID.25822800	2.29362	Tcell_EXH_Effector_CD8_T_cell_at_day_8_p.i_Armstrong_vs_Naive_CD8_T_cell_Metagene_1_Science.2016_PMID.27789795	0.453224	LCK_Breast.Cancer.Research.2008_PMID.19272155	2.71496	CIBERSORT_T_cells_regulatory_Tregs_Nat.Methods.2015_PMID.25822800	1.73732
Bcells_Naive_J.Clin.Oncol.2015_PMID.25800755	1.75307	MHC_Forero_24_Cancer.Immunol.Res.2016_PMID.26980599	1.8031	CIBERSORT_T_cells_CD4_memory_resting_Nat.Methods.2015_PMID.25822800	2.29178	IMMUNE_Bindea_Cell_DC_Immunity.2013_PMID.24138885	0.454917	TCGA.BRCA.1198_immune_CD8_GZMK_JCI.2020_PMID.32573490	2.71457	CD103_Ratio_Cancer.Cell.2014_PMID.25446897	1.75511
LumB_Basal_JCI.2020_PMID.32573490	1.74527	Mature_Luminal_Down_Nat.Med.2009_PMID.19648928	1.79326	TLS_Hallmark_Gene_Signature_PMID.31942071	2.28718	Murat_G07_J.Clin.Oncol.2008_PMID.18565887	0.456556	GSEA_BIOCARTA_CTLA4_PATHWAY	2.71129	T.cells_MCP_PMID.31942075_PMID.31942077	1.73765
TCGA.BRCA.1198_TP63_JCI.2020_PMID.32573490	1.68624	CIBERSORT_Eosinophils_Nat.Methods.2015_PMID.25822800	1.79005	IMMUNE_Bindea_Cell_T_cells_Immunity.2013_PMID.24138885	2.27476	MM_Claudinlow_Genome.Biol.2013_PMID.24220145	0.457467	TCGA.BRCA.1198_immune_GIMAP_IL16_JCI.2020_PMID.32573490	2.70269	IMMUNE_Bindea_Cell_T_cells_Immunity.2013_PMID.24138885	1.71049
Pcorr_Breast2Lung_LM2_Correlation_Nature.2005_PMID.16049480	1.64304	MDACC.FNA.2_J.Clin.Oncol.2010_PMID.20805453	1.78456	LCK_Breast.Cancer.Research.2008_PMID.19272155	2.25994	CIBERSORT_Neutrophils_Nat.Methods.2015_PMID.25822800	0.461184	CIBERSORT_T_cells_regulatory_Tregs_Nat.Methods.2015_PMID.25822800	2.68876	Mouse_Human_ImmuneProfiles_SHAY_M_H_Induced_in_T_PNAS.2013_PMID.23382184_	1.78138
MM_DMBAwnt_1pFDR_UP_Genome.Biology.2007_PMID.17493263	1.5992	IgG_Breast.Cancer.Research.2008_PMID.19272155	1.75992	TCGA.BRCA.1198_immune_CD8_GZMK_JCI.2020_PMID.32573490	2.247	Myeloid_dendritic_cells_MCP_PMID.31942075_PMID.31942077	0.463011	T.cells_MCP_PMID.31942075_PMID.31942077	2.6881	CIBERSORT_T_cells_CD4_memory_activated_Nat.Methods.2015_PMID.25822800	1.68291
GSEA_RETINOL_METABOLISM_KEGG	0.196557	Lim2010_MaSC_Adam_PMID.25575446	1.75844	T_Cell_cluster_Iglesia_CCR.2014_PMID.24916698	2.24006	Early_IRS_1_PLoS.One.2016_PMID.26991655	0.4636	CIBERSORT_T_cells_gamma_delta_Nat.Methods.2015_PMID.25822800	2.68795	CIBERSORT_T_cells_CD4_memory_resting_Nat.Methods.2015_PMID.25822800	1.689
GSEA_GP10_Fatty_acid_oxidation.r.0.930_CARBOXYLIC_ACID_METABOLIC_PROCESS	0.324876	MS_CD44_UP_PNAS.2009_PMID.19666588	1.73392	CD103_Positive_Cancer.Cell.2014_PMID.25446897	2.23758	Mouse_Human_ImmuneProfiles_SHAY_M_H_Induced_in_GN_PNAS.2013_PMID.23382184_	0.464373	DAN_ImmuneActive_Cell.2019_PMID.31730857	2.68491	IMMUNE_PEREZ_14_JCO.2015_PMID.2560586	1.70667
Neutrophils_MCP_PMID.31942075_PMID.31942077	0.348422	Fibromatosis_Lab.Invest.2008_PMID.18414401	1.7298	CIBERSORT_T_cells_CD8_Nat.Methods.2015_PMID.25822800	2.23746	Tcell_EXH_Memory_CD8_T_cell_a_vs_Naive_CD8_T_cell_Metagene_2_Science.2016_PMID.27789795	0.468355	T_Cell_cluster_Iglesia_CCR.2014_PMID.24916698	2.65662	GSEA_BIOCARTA_CTLA4_PATHWAY	1.64777
MNB2_BMC.Med.Genomics.2011_PMID.21214954	0.389728	Lim2009_Stroma_Adam_PMID.25575446	1.72755	STAT3_Basal_Horvath_SHORT_PNAS.2014_PMID.25139989	2.23256	MECM_BMC.Med.Genomics.2011_PMID.21214954	0.4685	Myeloid_dendritic_cells_MCP_PMID.31942075_PMID.31942077	2.64593	TCGA.BRCA.1198_immune_CD8_GZMK_JCI.2020_PMID.32573490	1.65799
Lums_HER2E_UP_metastatic.signature_JCI.2020_PMID.32573490	0.409172	PDGFRB_Single_Gene	1.72636	CD8_cluster_Iglesia_CCR.2014_PMID.24916698	2.20589	Tcell_EXH_Memory_CD8_T_cell_a_vs_Naive_CD8_T_cell_Metagene_1_Science.2016_PMID.27789795	0.476351	TLS_New_9Gene_Signature_PMID.31942071	2.64471	T_Cell_cluster_Iglesia_CCR.2014_PMID.24916698	1.63853
Lymphovascular_Invasion_J.Pathol.2017_PMID.27861902	0.427618	EMT_UP_Weinberg_PNAS.2010_PMID.20713713	1.72411	TCGA.BRCA.1198_immune_CD4_CD53_CD84_BTK_JCI.2020_PMID.32573490	2.20563	aStr_HsEnriched_Refined2_BCR.2015_PMID.25575446	0.477666	B_Cell_cluster_Iglesia_CCR.2014_PMID.24916698	2.63782	CD8_cluster_Iglesia_CCR.2014_PMID.24916698	1.64511
Mmyosin_BMC.Med.Genomics.2011_PMID.21214954	0.430406	TCGA.BRCA.1198_UNKNOWN2_JCI.2020_PMID.32573490	1.724	TCGA.BRCA.1198_IMMUNOGLOBULIN_PMID.26451490	2.20077	MM_Potluck_1pFDR_UP_Genome.Biology.2007_PMID.17493263	0.479976	Claudin_High_Genome.Biol.2007_PMID.17493263	2.6287	CIBERSORT_T_cells_CD8_Nat.Methods.2015_PMID.25822800	1.63376
TCGA.BRCA.1198_NORMAL2_JCI.2020_PMID.32573490	0.43387	Stromal_Up_Nat.Med.2009_PMID.19648928	1.72396	TCGA.BRCA.1198_immune_GIMAP_IL16_JCI.2020_PMID.32573490	2.19629	MIR_200c_Induced_ONCO.2015_PMID.25746005	0.483122	Mouse_Human_ImmuneProfiles_SHAY_M_H_Induced_in_NK_PNAS.2013_PMID.23382184_	2.62363	Neutrophils_MCP_PMID.31942075_PMID.31942077	0.515481
MNB1_BMC.Med.Genomics.2011_PMID.21214954	0.439122	Lim2010_Stroma_Adam_PMID.25575446	1.72155	DAN_ImmuneActive_Cell.2019_PMID.31730857	2.19062	Spike2012_fStr_PMID.25575446	0.483374	CD103_Positive_Cancer.Cell.2014_PMID.25446897	2.61276	MM_Stat1_Genome.Biol.2013_PMID.24220145	0.528228
Pcorr_Hypoxia_High_Correlation_PLoS.Med.2006_PMID.16417408	0.441673	MDACC.FNA.1_J.Clin.Oncol.2010_PMID.20805453	1.72153	GSEA_BIOCARTA_CTLA4_PATHWAY	2.16856	IMMUNE_Bindea_Cell_Lymph_vessels_Immunity.2013_PMID.24138885	0.484264	CIBERSORT_T_cells_CD4_memory_activated_Nat.Methods.2015_PMID.25822800	2.61016	MM_Wnt1.Early_Genome.Biol.2013_PMID.24220145	0.546616
X5Q_Breast.Cancer.Res.Treat.2012_PMID.22048815	0.460124	IMMUNE_Bindea_Cell_Th1_cells_Immunity.2013_PMID.24138885	1.72018	Claudin_High_Genome.Biol.2007_PMID.17493263	2.15905	CD34_CD36_Cluster_BMC.Med.Genomics.2011_PMID.21214954	0.484494	GSEA_PD1_SIGNALING_REACTOME	2.58678
PDGFRA_Single_Gene	0.468381	MIR_200c_Repressed_ONCO.2015_PMID.25746005	1.71741	IgG_Breast.Cancer.Research.2008_PMID.19272155	2.15433	IMMUNE_Bindea_Cell_pDC_Immunity.2013_PMID.24138885	0.484498	GSEA_GP2_Immune_Tcell_Bcell.r.0.964_KEGG_HEMATOPOIETIC_CELL_LINEAGE	2.57746
REPLICATION_STRESS_DOWN_SET_Cell.Rep.2018_PMID.29768207	0.468708	Wahl_fSTR_Signature_Cell.Stem.Cell.2012_PMID.22305568	1.71535	Miller_B_P_Metagene_Genome_Biol_2013_PMID.23618380	2.14951	CIBERSORT_Dendritic_cells_resting_Nat.Methods.2015_PMID.25822800	0.488638	Bcell_Tcell_Cooperation_Cell.2019_PMID.31730857	2.49485
REPLICATION_STRESS_NEG_Cell.Rep.2018_PMID.29768207	0.469889	TCGA.BRCA.1198_IMMUNOGLOBULIN_PMID.26451490	1.71479	Immune_High_In_Response_MCP_TLS_Melanoma_PMID.31942075	2.11153	Lung.WNT.DiMeo_Cancer.Res.2009_PMID.19549913	0.495151	Verhaak_Immune_Nat.Commun.2013_PMID.24113773	2.49236
Shipitsin_CD44_B_Cancer.Cell.2007_PMID.17349583	0.473963	Miller_B_P_Metagene_Genome_Biol_2013_PMID.23618380	1.709	GSEA_PD1_SIGNALING_REACTOME	2.08216	CIBERSORT_Monocytes_Nat.Methods.2015_PMID.25822800	0.497187	Pcorr_secretory_CCR.2010_PMID.20643781	2.49004
IMMUNE_Bindea_Cell_DC_Immunity.2013_PMID.24138885	0.480151	TCGA.BRCA.1198_UNKNOWN1_JCI.2020_PMID.32573490	1.70233	MacTh1_cluster_Iglesia_CCR.2014_PMID.24916698	2.05799	PDGFRB_Single_Gene	0.499228	Immune_Hot_using_CD8_vs_Cold_PMID.31942071	2.47673
Pcorr_secretory_CCR.2010_PMID.20643781	0.48159	Shehata2012_Stroma_PMID.25575446	1.70054	MERCK_Immune_signature_Science.2018_PMID.30309915	2.04905	Pcorr_Hypoxia_High_Correlation_PLoS.Med.2006_PMID.16417408	0.500145	IMMUNE_Bindea_Cell_Cytotoxic_cells_Immunity.2013_PMID.24138885	2.44929
IMMUNE_Bindea_Cell_CD8_T_cells_Immunity.2013_PMID.24138885	0.494034	T_RM_Cell_single_cell_signature_Savas_Nat_Med.2018_PMID.29942092	1.68642	GSEA_GP2_Immune_Tcell_Bcell.r.0.949_PerouLab_Immune_cell_Cluster_BMC_Med_Genomics_2011_PMID.21214954	2.04876	MDSC_tumor_Schlecker_J.Immunol.2012_PMID.23152559	0.500456	Inflammatory_Breast_Cancer_491_IBC_CCR.2013_PMID.23396049	2.43371
UNC_Differentiation.Score_Model_BCR.2010_PMID.20813035	0.497632	MHC_Forero_11_Cancer.Immunol.Res.2016_PMID.26980599	1.68488	CTLA4_Single_Gene	2.04781	Bcells_Plasmablast_J.Clin.Oncol.2015_PMID.25800755	0.504152	STAT3_Basal_Horvath_SHORT_PNAS.2014_PMID.25139989	2.42593
GSEA_RESPONSE_TO_ANDROGEN_UP_NELSON	0.499025	Bcells_Naive_J.Clin.Oncol.2015_PMID.25800755	1.68395	STAT3_Basal_Horvath_PNAS.2014_PMID.25139989	2.04708	Claudin_High_Genome.Biol.2007_PMID.17493263	0.505001	IMMUNE_Bindea_Cell_B_cells_Immunity.2013_PMID.24138885	2.42393
Early_IRS_1_PLoS.One.2016_PMID.26991655	0.499512	aStr_Lim09_BCR.2015_PMID.25575446	1.67982	MHC_Forero_24_Cancer.Immunol.Res.2016_PMID.26980599	2.04597	EMT_UP_Weinberg_PNAS.2010_PMID.20713713	0.50504	GSEA_GP2_Immune_Tcell_Bcell.r.0.949_PerouLab_Immune_cell_Cluster_BMC_Med_Genomics_2011_PMID.21214954	2.41276
PARP_Sensitivity_Signature_NEGATIVE_Sci.Adv.2017_PMID.28439535	0.499887	Miller_M_D_Metagene_Genome_Biol_2013_PMID.23618380	1.67957	Immune_Hot_using_CD8_vs_Cold_PMID.31942071	2.04074	CIBERSORT_NK_cells_resting_Nat.Methods.2015_PMID.25822800	0.507086	STAT3_Basal_Horvath_PNAS.2014_PMID.25139989	2.37695
Chemo_Endocrine_Score_CC_.2.LumA_subtract.by_CC.2.Basal_Clin.Cancer.Res.2017_PMID.27903675	0.50197	Stingl_Down_Basal_High_Nat.Cell.Biol.2014_PMID.25173976	1.67596	Stromal_Inflammation_J.Pathol.2017_PMID.27861902	2.0329	Tcell_EXH_Memory_CD8_T_cell_a_vs_Naive_CD8_T_cell_Metagene_3_Science.2016_PMID.27789795	0.507169	MERCK_Immune_signature_Science.2018_PMID.30309915	2.34887
GSEA_PI3K_CASCADE_REACTOME	0.512145	MHC.II_Breast.Cancer.Research.2008_PMID.19272155	1.67194	CIBERSORT_T_cells_gamma_delta_Nat.Methods.2015_PMID.25822800	2.03029	Duke_Module01_acidosis_Mike_PMID.20335537	0.513942	IMMUNE_Bindea_Cell_DC_Immunity.2013_PMID.24138885	2.34572
Mouse_Human_ImmuneProfiles_SHAY_M_H_Induced_in_NK_PNAS.2013_PMID.23382184_	0.518625	Pcorr_Breast2Lung_LM2_Correlation_Nature.2005_PMID.16049480	1.67129	Verhaak_Immune_Nat.Commun.2013_PMID.24113773	2.00882	TCGA.BRCA.1198_immune_GIMAP_IL16_JCI.2020_PMID.32573490	0.515637	Parity_signature_Troester_40_BCR.2014_PMID.25005139	2.342
MM_Normal.like_Genome.Biol.2013_PMID.24220145	0.519769	aStr_HsEnriched_BCR.2015_PMID.25575446	1.66756	TCGA_CSF1_response_Immunity.2018_PMID._29628290	1.99707	TCGA_TGFB_score_21050467_Immunity.2018_PMID._29628290	0.51582	Tcell_EXH_Memory_CD8_T_cell_a_vs_Naive_CD8_T_cell_Metagene_2_Science.2016_PMID.27789795	2.30192
LUMINAL_Cluster_BMC.Med.Genomics.2011_PMID.21214954	0.521081	Scorr_EMAT1_Correlation_BCR.2020_PMID.32641077	1.66467	T_RM_Cell_single_cell_signature_Savas_Nat_Med.2018_PMID.29942092	1.9797	IMMUNE_Bindea_Cell_Mast_cells_Immunity.2013_PMID.24138885	0.516421	Tcell_EXH_Effector_CD8_T_cell_at_day_8_p.i_Armstrong_vs_Naive_CD8_T_cell_Metagene_1_Science.2016_PMID.27789795	2.30089
Mature_LuminaUp_Nat.Med.2009_PMID.19648928	0.524313	MProtocadherin_BMC.Med.Genomics.2011_PMID.21214954	1.66406	Lung.WNT.DiMeo_Cancer.Res.2009_PMID.19549913	1.97203	Miller_M_D_Metagene_Genome_Biol_2013_PMID.23618380	0.518318	Tcell_EXH_Exhausted_CD8_T_cell_vs_Naive_CD8_T_cell_Metagene_3_Science.2016_PMID.27789795	2.28091
Lim2009_MatureLum_Adam_PMID.25575446	0.528593	Mouse_Human_ImmuneProfiles_SHAY_M_H_Induced_in_GN_PNAS.2013_PMID.23382184_	1.66278	CIBERSORT_NK_cells_activated_Nat.Methods.2015_PMID.25822800	1.95915	LOBULAR_TCGA_SUBTYPE_Immune_related_Cell.2015_PMID.26451490	0.518777	PDGFRA_Single_Gene	2.25555
MPYMT_NEU_Cluster_BMC.Med.Genomics.2011_PMID.21214954	0.53104	TCGA.BRCA.1198_BASAL_JCI.2020_PMID.32573490	1.66164	MHC_Forero_11_Cancer.Immunol.Res.2016_PMID.26980599	1.95235	Bcells_Memory_J.Clin.Oncol.2015_PMID.25800755	0.519256	TCGA.BRCA.1198_immune_CD4_CD53_CD84_BTK_JCI.2020_PMID.32573490	2.25366
MatureLum_Prat_BCR.2015_PMID.25575446	0.534249	Murat_G07_J.Clin.Oncol.2008_PMID.18565887	1.66163	Inflammatory_Breast_Cancer_491_IBC_CCR.2013_PMID.23396049	1.94593	IMMUNE_PEREZ_14_JCO.2015_PMID.2560586	0.521171	CIBERSORT_Dendritic_cells_resting_Nat.Methods.2015_PMID.25822800	2.25295
MASC_Down_Nat.Med.2009_PMID.19648928	0.535602	REPLICATION_STRESS_MODEL_Cell.Rep.2018_PMID.29768207	1.65788	Bcells_Memory_J.Clin.Oncol.2015_PMID.25800755	1.94278	IMMUNE_Bindea_Cell_Cytotoxic_cells_Immunity.2013_PMID.24138885	0.52286	GSEA_CASPASE_CASCADE_APOPTOSIS_SA	2.25065
Pfefferle2012_MatureLum_PMID.25575446	0.536511	IMMUNE_Bindea_Cell_Lymph_vessels_Immunity.2013_PMID.24138885	1.65477	CIBERSORT_NK_cells_resting_Nat.Methods.2015_PMID.25822800	1.93337	MDACC.FNA.1_J.Clin.Oncol.2010_PMID.20805453	0.522909	Immune_High_In_Response_MCP_TLS_Melanoma_PMID.31942075	2.22252
ESR1_Single_Gene	0.539076	TCGA_CSF1_response_Immunity.2018_PMID._29628290	1.64659	MHC.II_Breast.Cancer.Research.2008_PMID.19272155	1.91937	MM_Stat1_Genome.Biol.2013_PMID.24220145	0.523527	IGG_Cluster_BMC.Med.Genomics.2011_PMID.21214954	2.21927
MM_NeuPyMT_1pFDR_UP_Genome.Biology.2007_PMID.17493263	0.541088	IMMUNE_Bindea_Cell_Normal_mucosa_Immunity.2013_PMID.24138885	1.64101	CIBERSORT_Macrophages_M1_Nat.Methods.2015_PMID.25822800	1.90569	CIBERSORT_NK_cells_activated_Nat.Methods.2015_PMID.25822800	0.523902	MacTh1_cluster_Iglesia_CCR.2014_PMID.24916698	2.21608
TCGA.BRCA.1198_UNKNOWN6_JCI.2020_PMID.32573490	0.545569	Fibroblast_Cluster_BMC.Med.Genomics.2011_PMID.21214954	1.64064	Bcell_IL10_PLUS_LIN_J_Immunol.2014_PMID.25080484	1.89193	MDSC_Neutrophil_Youn_J_Leukoc_Biol.2012_PMID.21954284	0.524924	T_RM_Cell_single_cell_signature_Savas_Nat_Med.2018_PMID.29942092	2.2034
MatureLum_HsEnriched_Refined1_BCR.2015_PMID.25575446	0.550946	fMaSC.refined1_PMID.25575446	1.64062	Parity_signature_Troester_40_BCR.2014_PMID.25005139	1.88943	CIBERSORT_Macrophages_M0_Nat.Methods.2015_PMID.25822800	0.525643	Bcell_IL10_PLUS_LIN_J_Immunol.2014_PMID.25080484	2.18076
Excellent_Pathologic_Response_ER.Neg_55_JAMA.2011_PMID.21558518	0.552767	LOBULAR_TCGA_SIGNATURE_Reactive_like_Cell.2015_PMID.26451490	1.63877	MS_CD44_UP_PNAS.2009_PMID.19666588	1.88723	aStr_HsEnriched_BCR.2015_PMID.25575446	0.526267	TCGA.BRCA.1198_immune_CD34_TIE1_JCI.2020_PMID.32573490	2.18022
Shehata2012_NCL_PMID.25575446	0.557045	MBASAL_BMC.Med.Genomics.2011_PMID.21214954	1.6373	GSEA_GP2_Immune_Tcell_Bcell.r.0.964_KEGG_HEMATOPOIETIC_CELL_LINEAGE	1.88357	Fibroblasts_MCP_PMID.31942075_PMID.31942077	0.526554	Parity_signature_Troester_251_BCR.2014_PMID.25005139	2.15882
MatureLum_Lim09_BCR.2015_PMID.25575446	0.557764	Claudin_High_Genome.Biol.2007_PMID.17493263	1.62641	CIBERSORT_Dendritic_cells_activated_Nat.Methods.2015_PMID.25822800	1.87939	Shipitsin_CD44_B_Cancer.Cell.2007_PMID.17349583	0.529239	Stromal_Signature_Nat.Med.2008_PMID.18438415	2.14518
MatureLum_HsEnriched_BCR.2015_PMID.25575446	0.558669	Pfefferle2012_Stroma_PMID.25575446	1.62243	IMMUNE_Bindea_Cell_aDC_Immunity.2013_PMID.24138885	1.87592	GSEA_CASPASE_CASCADE_APOPTOSIS_SA	0.531797	TCGA_CSF1_response_Immunity.2018_PMID._29628290	2.14046
YALE_PIK3CA_Pathway_Ann.Oncol.2017_PMID.28177460	0.56101	Immune_Suppression_Kardos_JCI.Insight.2016_PMID.27699256	1.62026	IMMUNE_Bindea_Cell_Th1_cells_Immunity.2013_PMID.24138885	1.87376	Pcorr_Adenocarcinoma_JMD.2013_PMID.23701907	0.532599	MHC.II_Breast.Cancer.Research.2008_PMID.19272155	2.13813
GSEA_BIOCARTA_AKT_PATHWAY	0.565025	MM_Wnt1.Late_Genome.Biol.2013_PMID.24220145	1.61891	EXTENDED_B_CELL_signatures_Garber_Cell.Mol.Gastroenterol.Hepatol.2017_PMID.28508029	1.86759	T_RM_Cell_single_cell_signature_Savas_Nat_Med.2018_PMID.29942092	0.532772	CIBERSORT_Dendritic_cells_activated_Nat.Methods.2015_PMID.25822800	2.1376
MIR_200c_Induced_ONCO.2015_PMID.25746005	0.567051	GSEA_GP2_Immune_Tcell_Bcell.r.0.964_KEGG_HEMATOPOIETIC_CELL_LINEAGE	1.61565	TCGA.BRCA.1198_immune_CTLA4_CXCL_FOXP3_JCI.2020_PMID.32573490	1.86111	aStr_Prat_BCR.2015_PMID.25575446	0.534286	EXTENDED_B_CELL_signatures_Garber_Cell.Mol.Gastroenterol.Hepatol.2017_PMID.28508029	2.13595
PARP_sensitivity_MDACC_NPJ.Syst.Biol.Appl._2017_PMID.28649435	0.56881	Pfefferle2012_MaSC_PMID.25575446	1.61184	TNBC_Clinically_Relevant_Good.26_BCR.2011_PMID.21978456	1.85821	Verhaak_Immune_Nat.Commun.2013_PMID.24113773	0.534574	TCGA.BRCA.1198_IMMUNE1_JCI.2020_PMID.32573490	2.13096
Pcorr_Adenocarcinoma_JMD.2013_PMID.23701907	0.569111	aStr_HsEnriched_Refined1_BCR.2015_PMID.25575446	1.59837	MDACC.FNA.1_J.Clin.Oncol.2010_PMID.20805453	1.85543	MHC.II_Breast.Cancer.Research.2008_PMID.19272155	0.536912	Melanoma_Scorr_Immune_Cell.2015_PMID.26091043	2.1267
MCF7.E2.repressed.genes_JCO.2006_PMID.16505416	0.573501	GSEA_GP4_MES_ECM.r.0.954_PerouLab_HS_Red7_BMC_Med_Genomics_2011_PMID.21214954	1.59269	Immune_Suppression_Kardos_JCI.Insight.2016_PMID.27699256	1.84938	Parity_signature_Troester_40_BCR.2014_PMID.25005139	0.539875	Stromal_Inflammation_J.Pathol.2017_PMID.27861902	2.121
TLS_New_9Gene_Signature_PMID.31942071	0.57541	IGG_Cluster_BMC.Med.Genomics.2011_PMID.21214954	1.58659	Scorr_EMAT1_Correlation_BCR.2020_PMID.32641077	1.83609	Duke_Module05_egfr_Mike_PMID.20335537	0.545006	MHC_Forero_11_Cancer.Immunol.Res.2016_PMID.26980599	2.11274
Duke_Module17_pr_Mike_PMID.20335537	0.576243	MERCK_Immune_signature_Science.2018_PMID.30309915	1.58106	LOBULAR_TCGA_SUBTYPE_Proliferative_Cell.2015_PMID.26451490	1.82093	Vascular.Content_Clin.Exp.Metastasis.2014_PMID.23975155	0.545125	CIBERSORT_Macrophages_M1_Nat.Methods.2015_PMID.25822800	2.10028
MM_PyMT.2012_Genome.Biol.2013_PMID.24220145	0.576849	Stingl_Day7_Downregulated_Nat.Cell.Biol.2014_PMID.25173976	1.57624	TCGA.BRCA.1198_immune_HLA_D_JCI.2020_PMID.32573490	1.81123	Inflammatory_Breast_Cancer_491_IBC_CCR.2013_PMID.23396049	0.545603	LOBULAR_TCGA_SIGNATURE_Immune_related_Cell.2015_PMID.26451490	2.08482
XBP1_Signature_Nature.2014_PMID.24670641	0.579925	TCGA.BRCA.1198_immune_GIMAP_IL16_JCI.2020_PMID.32573490	1.57597	Miller_M_D_Metagene_Genome_Biol_2013_PMID.23618380	1.80501	TCGA.BRCA.1198_immune_HLA_D_JCI.2020_PMID.32573490	0.546222	CIBERSORT_Eosinophils_Nat.Methods.2015_PMID.25822800	2.08477
Epithelial_Tubule_Formation_J.Pathol.2017_PMID.27861902	0.580547	MM_Squamous.like_Genome.Biol.2013_PMID.24220145	1.56943	IMMUNE_Bindea_Cell_Cytotoxic_cells_Immunity.2013_PMID.24138885	1.80131	Mouse_Human_ImmuneProfiles_SHAY_M_H_Induced_in_MO_PNAS.2013_PMID.23382184_	0.546751	TCGA.BRCA.1198_immune_HLA_D_JCI.2020_PMID.32573490	2.079
Lim2010_MatureLum_Adam_PMID.25575446	0.581756	aStr_Prat_BCR.2015_PMID.25575446	1.5673	Myeloid_dendritic_cells_MCP_PMID.31942075_PMID.31942077	1.79721	Pcorr_bronchioid_PLOS.2012_PMID.22590557	0.547798	Miller_M_D_Metagene_Genome_Biol_2013_PMID.23618380	2.07342
MatureLum_Shehata_BCR.2015_PMID.25575446	0.585388	TCGA.BRCA.1198_immune_CD4_CD53_CD84_BTK_JCI.2020_PMID.32573490	1.56404	Cytotoxic_lymphocytes_MCP_PMID.31942075_PMID.31942077	1.78553	Down_regulated_upon_N_RAS_repression_Cell_Rep.2015_PMID.26166574	0.547907	MProtocadherin_BMC.Med.Genomics.2011_PMID.21214954	2.07067
ACTIVATED_BLOOD_NEUTROPHIL_SIGNATURE_Nat.Cell.Biol.2019_PMID.31263265	0.586872	CORE_B_CELL_signatures_Garber_Cell.Mol.Gastroenterol.Hepatol.2017_PMID.28508029	1.55958	Stromal_Signature_Nat.Med.2008_PMID.18438415	1.77583	Stromal_Signature_Nat.Med.2008_PMID.18438415	0.547938	Immune_Suppression_Kardos_JCI.Insight.2016_PMID.27699256	2.06328
LOBULAR_TCGA_SUBTYPE_Immune_related_Cell.2015_PMID.26451490	0.587044	STAT3_Basal_Horvath_SHORT_PNAS.2014_PMID.25139989	1.55079	IMMUNE_Bindea_Cell_pDC_Immunity.2013_PMID.24138885	1.76105	MHC_Forero_11_Cancer.Immunol.Res.2016_PMID.26980599	0.548459	MDACC.FNA.1_J.Clin.Oncol.2010_PMID.20805453	2.06112
Duke_Module06_er_Mike_PMID.20335537	0.587547	aStr_Shehata_BCR.2015_PMID.25575446	1.54568	Parity_signature_Troester_251_BCR.2014_PMID.25005139	1.75778	Fibroblast_Cluster_BMC.Med.Genomics.2011_PMID.21214954	0.548603	Shipitsin_CD44_B_Cancer.Cell.2007_PMID.17349583	2.03987
C3_TAG_RESPONDING_Usary_Clin.Cancer.Res.2013_PMID.23780888	0.587592	Immune_High_In_Response_MCP_TLS_Melanoma_PMID.31942075	1.52009	Pcorr_squamoid_PLOS.2012_PMID.22590557	1.74966	Parity_signature_Troester_251_BCR.2014_PMID.25005139	0.548862	Tcell_EXH_Memory_CD8_T_cell_a_vs_Naive_CD8_T_cell_Metagene_1_Science.2016_PMID.27789795	2.03639
GSEA_GP7_Estrogen_signaling.r.0.97_SMID_BREAST_CANCER_BASAL_DN	0.596661	Bcells_Centrocyte_J.Clin.Oncol.2015_PMID.25800755	1.51112	CIBERSORT_Dendritic_cells_resting_Nat.Methods.2015_PMID.25822800	1.74802	Pcorr_secretory_CCR.2010_PMID.20643781	0.5499	Bcells_Memory_J.Clin.Oncol.2015_PMID.25800755	2.03024
MM_Normal_1pFDR_UP_Genome.Biology.2007_PMID.17493263	0.597448	IMMUNE_Bindea_Cell_B_cells_Immunity.2013_PMID.24138885	1.48311	LOBULAR_TCGA_SIGNATURE_Immune_related_Cell.2015_PMID.26451490	1.74209	MERCK_Immune_signature_Science.2018_PMID.30309915	0.551756	GSEA_GP16_Protein_kinase_signailng_MAPKs.r.0.893_INTRACELLULAR_SIGNALING_CASCADE	2.03021
Lim.et.al.2010.Conserved.Mature_BCR.2010_PMID.20346151	0.600548	TCGA.BRCA.1198_COLLAGEN11A_JCI.2020_PMID.32573490	1.4828	CIBERSORT_Macrophages_M2_Nat.Methods.2015_PMID.25822800	1.74013	Fibromatosis_Lab.Invest.2008_PMID.18414401	0.552076	TNBC_Clinically_Relevant_Good.26_BCR.2011_PMID.21978456	2.01561
UNC_Scorr_LumB_Correlation_JCO.2009_PMID.19204204	0.601279	Lums_HER2E_DOWN_metastatic.signature_JCI.2020_PMID.32573490	1.48148	PDCD1_Single_Gene	1.71716	Immune_Suppression_Kardos_JCI.Insight.2016_PMID.27699256	0.553201	Cytotoxic_lymphocytes_MCP_PMID.31942075_PMID.31942077	2.00481
Pcorr_Breast2Lung_Parental_Correlation_Nature.2005_PMID.16049480	0.603088	TCGA.BRCA.1198_IMMUNE1_JCI.2020_PMID.32573490	1.47417	CD34_CD36_Cluster_BMC.Med.Genomics.2011_PMID.21214954	1.67174	METAPLASTIC_Up_CanRes.2009_PMID.19435916	0.555716	Cytolytic_activity_signature_Rooney_Cell.2015_PMID.25594174	1.99012
Ductal_Carcinoma_In_Situ_J.Pathol.2017_PMID.27861902	0.605163	MET_DOWN_Significant_Genes_LOW_BASALS_1_Genes_JCI.2018_PMID.29480819	1.46027	Murat_G24_J.Clin.Oncol.2008_PMID.18565887	1.65935	aStr_Shehata_BCR.2015_PMID.25575446	0.558231	CIBERSORT_Macrophages_M2_Nat.Methods.2015_PMID.25822800	1.98646
IMMUNE_Bindea_Cell_Neutrophils_Immunity.2013_PMID.24138885	0.606873	TCGA.BRCA.1198_TP63_JCI.2020_PMID.32573490	1.45643	CD103_Ratio_Cancer.Cell.2014_PMID.25446897	1.63825	GSEA_BIOCARTA_AKT_PATHWAY	0.562603	YALE_PIK3CA_Pathway_Ann.Oncol.2017_PMID.28177460	1.98029
Immunosuppression_PMID.31942077	0.607736	CIBERSORT_Plasma_cells_Nat.Methods.2015_PMID.25822800	1.44979	Her2_Basal_JCI.2020_PMID.32573490	1.61965	IMMUNE_Bindea_Cell_Macrophages_Immunity.2013_PMID.24138885	0.564743	Tcell_EXH_Memory_CD8_T_cell_a_vs_Naive_CD8_T_cell_Metagene_3_Science.2016_PMID.27789795	1.97314
MProtocadherin_BMC.Med.Genomics.2011_PMID.21214954	0.607775	GSEA_RETINOL_METABOLISM_KEGG	0.264901	MM_Claudinlow_Genome.Biol.2013_PMID.24220145	1.61941	MM_Normal.like_Genome.Biol.2013_PMID.24220145	0.565019	Immunosuppression_PMID.31942077	1.9692
Tcell_EXH_Exhausted_CD8_T_cell_vs_Naive_CD8_T_cell_Metagene_3_Science.2016_PMID.27789795	0.619215	GSEA_GP10_Fatty_acid_oxidation.r.0.930_CARBOXYLIC_ACID_METABOLIC_PROCESS	0.318459	Cytolytic_activity_signature_Rooney_Cell.2015_PMID.25594174	1.60826	YALE_PIK3CA_Pathway_Ann.Oncol.2017_PMID.28177460	0.565065	TCGA.BRCA.1198_immune_CTLA4_CXCL_FOXP3_JCI.2020_PMID.32573490	1.96508
IMMUNE_Bindea_Cell_Blood_vessels_Immunity.2013_PMID.24138885	0.625548	MNB1_BMC.Med.Genomics.2011_PMID.21214954	0.422887	METAPLASTIC_Up_CanRes.2009_PMID.19435916	1.58909	TCGA_CSF1_response_Immunity.2018_PMID._29628290	0.56663	CTLA4_Single_Gene	1.96131
CIBERSORT_Neutrophils_Nat.Methods.2015_PMID.25822800	0.626698	TCGA.BRCA.1198_NORMAL2_JCI.2020_PMID.32573490	0.432914	MDSC_Neutrophil_Youn_J_Leukoc_Biol.2012_PMID.21954284	1.58579	DAN_ImmuneActive_Cell.2019_PMID.31730857	0.566679	Tcell_EXH_Exhausted_CD8_T_cell_vs_Naive_CD8_T_cell_Metagene_1_Science.2016_PMID.27789795	1.95942
		Mmyosin_BMC.Med.Genomics.2011_PMID.21214954	0.440234	HCK_Breast.Cancer.Research.2008_PMID.19272155	1.58009	GSEA_GP16_Protein_kinase_signailng_MAPKs.r.0.893_INTRACELLULAR_SIGNALING_CASCADE	0.569165	IMMUNE_Bindea_Cell_Blood_vessels_Immunity.2013_PMID.24138885	1.94628
		Lim2010_MatureLum_Adam_PMID.25575446	0.471217	LumB_Basal_JCI.2020_PMID.32573490	1.57031	Pfefferle2012_Stroma_PMID.25575446	0.569466	TCGA.BRCA.1198_IMMUNOGLOBULIN_PMID.26451490	1.94024
		TCGA.BRCA.1198_FGFR4_EGF_JCI.2020_PMID.32573490	0.505286	REPLICATION_STRESS_MODEL_Cell.Rep.2018_PMID.29768207	1.54765	MVEGFC_BMC.Med.Genomics.2011_PMID.21214954	0.57233	LOBULAR_TCGA_SUBTYPE_Immune_related_Cell.2015_PMID.26451490	1.93719
		UNC_Differentiation.Score_Model_BCR.2010_PMID.20813035	0.505498	Bcell_IL10_MINUS_LIN_J_Immunol.2014_PMID.25080484	1.54128	Shehata2012_Stroma_PMID.25575446	0.572969	Inflammatory_Breast_Cancer_79_IBC_CCR.2013_PMID.23396049	1.93319
		Scorr_EMAT3_Correlation_BCR.2020_PMID.32641077	0.508295	STAT1_Breast.Cancer.Research.2008_PMID.19272155	1.52791	Immunosuppression_PMID.31942077	0.574016	Bcells_Plasmablast_J.Clin.Oncol.2015_PMID.25800755	1.92043
		Lums_HER2E_UP_metastatic.signature_JCI.2020_PMID.32573490	0.52557	Scorr_IIE_Correlation_JCO.2006_PMID.16505416	1.52757	TCGA.BRCA.1198_IL8_CCL_JCI.2020_PMID.32573490	0.575005	Miller_B_P_Metagene_Genome_Biol_2013_PMID.23618380	1.91799
		Pcorr_magnoid_PLOS.2012_PMID.22590557	0.529259	IMMUNE_Bindea_Cell_TFH_Immunity.2013_PMID.24138885	1.52444	IMMUNE_PEREZ_87_JCO.2015_PMID.2560586	0.57577	MHC_Forero_24_Cancer.Immunol.Res.2016_PMID.26980599	1.89822
		Pcorr_Breast2Lung_Parental_Correlation_Nature.2005_PMID.16049480	0.548961	TCGA_Tfh_cells_Immunity.2018_PMID._29628290	1.52444	Immune_Hot_using_CD8_vs_Cold_PMID.31942071	0.575984	IgG_Breast.Cancer.Research.2008_PMID.19272155	1.89218
				Tcell_EXH_Effector_CD8_T_cell_at_day_8_p.i_Armstrong_vs_Naive_CD8_T_cell_Metagene_1_Science.2016_PMID.27789795	1.5175	GSEA_PD1_SIGNALING_REACTOME	0.577084	MNB2_BMC.Med.Genomics.2011_PMID.21214954	1.89199
				Inflammatory_Breast_Cancer_79_IBC_CCR.2013_PMID.23396049	1.50886	GSEA_GP4_MES_ECM.r.0.954_PerouLab_HS_Red7_BMC_Med_Genomics_2011_PMID.21214954	0.577384	GSEA_HDAC_TARGETS_DN_HELLER	1.88362
				MM_Potluck_1pFDR_UP_Genome.Biology.2007_PMID.17493263	1.50028	IMMUNE_Bindea_Cell_Tem_Immunity.2013_PMID.24138885	0.578059	Murat_G24_J.Clin.Oncol.2008_PMID.18565887	1.87442
				CIBERSORT_Eosinophils_Nat.Methods.2015_PMID.25822800	1.49788	MM_Squamous.like_Genome.Biol.2013_PMID.24220145	0.580723	IMMUNE_Bindea_Cell_pDC_Immunity.2013_PMID.24138885	1.85436
				Tcell_EXH_Memory_CD8_T_cell_a_vs_Naive_CD8_T_cell_Metagene_2_Science.2016_PMID.27789795	1.49729	CIBERSORT_T_cells_CD8_Nat.Methods.2015_PMID.25822800	0.580953	Early_IRS_1_PLoS.One.2016_PMID.26991655	1.84799
				LumA_Basal_JCI.2020_PMID.32573490	1.4938	GSEA_GP2_Immune_Tcell_Bcell.r.0.949_PerouLab_Immune_cell_Cluster_BMC_Med_Genomics_2011_PMID.21214954	0.581344	IMMUNE_Bindea_Cell_Lymph_vessels_Immunity.2013_PMID.24138885	1.84205
				Durvalumab_signature_Higgs_Clin.Cancer.Res.2018_PMID.29716923	1.48908	CIBERSORT_T_cells_gamma_delta_Nat.Methods.2015_PMID.25822800	0.583484	HCK_Breast.Cancer.Research.2008_PMID.19272155	1.82347
				Mature_Luminal_Down_Nat.Med.2009_PMID.19648928	1.48256	CIBERSORT_T_cells_CD4_memory_resting_Nat.Methods.2015_PMID.25822800	0.584905	IMMUNE_Bindea_Cell_T_helper_cells_Immunity.2013_PMID.24138885	1.81841
				T_cell_activation_PMID.31942077	1.48214	STAT3_Basal_Horvath_PNAS.2014_PMID.25139989	0.587909	GSEA_BIOCARTA_AKT_PATHWAY	1.81461
				Bcells_Naive_J.Clin.Oncol.2015_PMID.25800755	1.48137	LCK_Breast.Cancer.Research.2008_PMID.19272155	0.590893	CIBERSORT_Monocytes_Nat.Methods.2015_PMID.25822800	1.81037
				aStr_HsEnriched_Refined2_BCR.2015_PMID.25575446	1.48089	STAT3_Basal_Horvath_SHORT_PNAS.2014_PMID.25139989	0.593435	MDSC_tumor_Schlecker_J.Immunol.2012_PMID.23152559	1.8009
				TCGA.BRCA.1198_immune_HLA_A_F_JCI.2020_PMID.32573490	1.47832	Mouse_Human_ImmuneProfiles_SHAY_M_H_Induced_in_T_PNAS.2013_PMID.23382184_	0.595295	CIBERSORT_Plasma_cells_Nat.Methods.2015_PMID.25822800	1.79297
				Verhaak_Stromal_Nat.Commun.2013_PMID.24113773	1.45299	REPLICATION_STRESS_NEG_Cell.Rep.2018_PMID.29768207	0.599228	Monocytic_lineage_MCP_PMID.31942075_PMID.31942077	1.78454
				TCGA.BRCA.1198_NORMAL_JCI.2020_PMID.32573490	1.45042	Miller_T_NK_Metagene_Genome_Biol_2013_PMID.23618380	0.600678	MM_Claudinlow_Genome.Biol.2013_PMID.24220145	1.7801
				GSEA_RETINOL_METABOLISM_KEGG	0.25652	CD8_cluster_Iglesia_CCR.2014_PMID.24916698	0.603077	Scorr_EMAT1_Correlation_BCR.2020_PMID.32641077	1.77589
				GSEA_GP10_Fatty_acid_oxidation.r.0.930_CARBOXYLIC_ACID_METABOLIC_PROCESS	0.357038	IMMUNE_Bindea_Cell_T_cells_Immunity.2013_PMID.24138885	0.604094	Lymphovascular_Invasion_J.Pathol.2017_PMID.27861902	1.77396
				TCGA.BRCA.1198_NORMAL2_JCI.2020_PMID.32573490	0.409158	TCGA.BRCA.1198_immune_CD8_GZMK_JCI.2020_PMID.32573490	0.610776	MM_Normal.like_Genome.Biol.2013_PMID.24220145	1.77395
				Mmyosin_BMC.Med.Genomics.2011_PMID.21214954	0.42162	TLS_tumors_w_TLS_and_CD8_v_CD8alone_PMID.31942071	0.612224	T_cell_activation_PMID.31942077	1.77354
				Lim2010_MatureLum_Adam_PMID.25575446	0.474263	CIBERSORT_T_cells_CD4_naive_Nat.Methods.2015_PMID.25822800	0.614072	MM_Potluck_1pFDR_UP_Genome.Biology.2007_PMID.17493263	1.77235
				TCGA.BRCA.1198_FGFR4_EGF_JCI.2020_PMID.32573490	0.474351	GSEA_GP6_Squamous_differentiation_development.r.0.902_RICKMAN_TUMOR_DIFFERENTIATED_WELL_VS_POORLY_DN	0.615058	CIBERSORT_Macrophages_M0_Nat.Methods.2015_PMID.25822800	1.77234
				Neutrophils_MCP_PMID.31942075_PMID.31942077	0.478577			TCGA.BRCA.1198_NORMAL_JCI.2020_PMID.32573490	1.77132
				UNC_Differentiation.Score_Model_BCR.2010_PMID.20813035	0.514049			IMMUNE_Bindea_Cell_Tcm_Immunity.2013_PMID.24138885	1.76588
				Mature_LuminaUp_Nat.Med.2009_PMID.19648928	0.53908			ACTIVATED_BLOOD_NEUTROPHIL_SIGNATURE_Nat.Cell.Biol.2019_PMID.31263265	1.76426
				Pcorr_magnoid_PLOS.2012_PMID.22590557	0.539865			Down_regulated_upon_N_RAS_repression_Cell_Rep.2015_PMID.26166574	1.76119
				Lim2009_MatureLum_Adam_PMID.25575446	0.546946			STAT1_Breast.Cancer.Research.2008_PMID.19272155	1.7529
				Pfefferle2012_MatureLum_PMID.25575446	0.549285			Endothelial_cells_MCP_PMID.31942075_PMID.31942077	1.72598
				MM_Neu.2012_Genome.Biol.2013_PMID.24220145	0.550049			Mouse_Human_ImmuneProfiles_SHAY_M_H_Induced_in_DC_PNAS.2013_PMID.23382184_	1.72494
				Lim.et.al.2010.Conserved.Mature_BCR.2010_PMID.20346151	0.55443			Duke_Module19_src_Mike_PMID.20335537	1.72487
				MM_Erbb2.like_Genome.Biol.2013_PMID.24220145	0.55653			CD34_CD36_Cluster_BMC.Med.Genomics.2011_PMID.21214954	1.72282
				MPYMT_NEU_Cluster_BMC.Med.Genomics.2011_PMID.21214954	0.55754			MIR_200c_Induced_ONCO.2015_PMID.25746005	1.71677
				MatureLum_Lim09_BCR.2015_PMID.25575446	0.558621			Verhaak_Stromal_Nat.Commun.2013_PMID.24113773	1.70849
				Lums_HER2E_UP_metastatic.signature_JCI.2020_PMID.32573490	0.568152			ACTIVATED_LUNG_NEUTROPHIL_SIGNATURE_Nat.Cell.Biol.2019_PMID.31263265	1.70379
				Scorr_EMAT3_Correlation_BCR.2020_PMID.32641077	0.570036			Ribosomal_Cluster_BMC.Med.Genomics.2011_PMID.21214954	1.70167
				Claudin_Low_Genome.Biol.2007_PMID.17493263	0.571014			Duke_Module22_tnfa_Mike_PMID.20335537	1.6954
				MNB1_BMC.Med.Genomics.2011_PMID.21214954	0.571731			CIBERSORT_Mast_cells_resting_Nat.Methods.2015_PMID.25822800	1.6945
				Shehata2012_NCL_PMID.25575446	0.580228			MRibosomal_BMC.Med.Genomics.2011_PMID.21214954	1.69328
				MS_CD44_DOWN_PNAS.2009_PMID.19666588	0.585402			TCGA.BRCA.1198_immune_HLA_A_F_JCI.2020_PMID.32573490	1.68939
				MatureLum_HsEnriched_Refined1_BCR.2015_PMID.25575446	0.588832			PTEN_Single_Gene	1.68169
				MRE_Score_Breast.Cancer.Res.Treat_2015_PMID.26109344	0.592627			Duke_Module11_ifng_Mike_PMID.20335537	1.68076
				Secretoglobin_BMC.Med.Genomics.2011_PMID.21214954	0.595539			aStr_HsEnriched_Refined2_BCR.2015_PMID.25575446	1.6708
				GSEA_PI3K_CASCADE_REACTOME	0.599427			MYC_Single_Gene	1.66668
				GSEA_GP7_Estrogen_signaling.r.0.97_SMID_BREAST_CANCER_BASAL_DN	0.599806			Lung.WNT.DiMeo_Cancer.Res.2009_PMID.19549913	1.66549
				Epithelial_Tubule_Formation_J.Pathol.2017_PMID.27861902	0.600811			CD68_cluster_Iglesia_CCR.2014_PMID.24916698	1.652
				TCGA.BRCA.1198_UNKNOWN6_JCI.2020_PMID.32573490	0.604466			MDACC.FNA.2_J.Clin.Oncol.2010_PMID.20805453	1.65105
				MatureLum_HsEnriched_BCR.2015_PMID.25575446	0.606958			M2_Macrophage_Blood.2006_PMID.16556895	1.62884
				HGF_down_BCR.2013_PMID.24025166	0.60957			Durvalumab_signature_Higgs_Clin.Cancer.Res.2018_PMID.29716923	1.62719
				MatureLum_Prat_BCR.2015_PMID.25575446	0.609733			aStr_HsEnriched_BCR.2015_PMID.25575446	1.62005
								Pcorr_Adenocarcinoma_JMD.2013_PMID.23701907	1.6166
								Spike2012_fStr_PMID.25575446	1.61443
								CIBERSORT_Mast_cells_activated_Nat.Methods.2015_PMID.25822800	1.55512
								IMMUNE_Bindea_Cell_Tgd_Immunity.2013_PMID.24138885	0.262485
								TCGA_Tgd_cells_Immunity.2018_PMID._29628290	0.262485
								GSEA_GP13_Neural_signailng.r.0.959_MODULE_100	0.27381
								Chromogramin_BMC.Med.Genomics.2011_PMID.21214954	0.315141
								TCGA.BRCA.1198_Chromogranin_JCI.2020_PMID.32573490	0.332753
								Murat_G18_J.Clin.Oncol.2008_PMID.18565887	0.343346
								GSEA_GP13_Neural_signailng.r.0.894_NERVOUS_SYSTEM_DEVELOPMENT	0.3662
								Pcorr_classical_CCR.2010_PMID.20643781	0.367998
								Wahl_fMasC_Signature_Cell.Stem.Cell.2012_PMID.22305568	0.374956
								High_In_No_Response_MCP_TLS_Melanoma_PMID.31942075	0.397981
								Spike2012_fMaSC_PMID.25575446	0.400879
								MM_Wnt1.Late_Genome.Biol.2013_PMID.24220145	0.483083
