# Supplementary material for: Multiplatform Analysis of Primary and Metastatic Breast Tumors from the AURORA US Network identifies microenvironment and epigenetics drivers of metastasis
Source: Research Square preprint supplement (doi:10.21203/rs.3.rs-1221704/v1), 2022-01-11
Supplement: Supplementary file 7 [file e2cd9cbdeaeb5adabc7da92f.xlsx]

## Sheet: Index
Sheet	Content
Fig.4_ENCODE_GEO	Methylation_external_normal_data
Fig1c_5000_variab_me_probes	Fig1c_5000_variably_methylated_probes
Fig1c_146385_unme_probes	Fig1c_146385_unmethylated_probes

## Sheet: Fig.4_ENCODE_GEO
Source	Accession	Tissue
ENCODE	ENCSR013RTW	adrenal
ENCODE	ENCSR155JGP	adrenal
ENCODE	ENCSR209XGZ	adrenal
ENCODE	ENCSR371REA	adrenal
ENCODE	ENCSR399KXO	adrenal
ENCODE	ENCSR937LYZ	liver
ENCODE	ENCSR113TRL	lung
ENCODE	ENCSR426CDE	lung
ENCODE	ENCSR444YPR	lung
ENCODE	ENCSR493EGV	lung
ENCODE	ENCSR511SNB	ovary
ENCODE	ENCSR744AJV	ovary
ENCODE	ENCSR203HAK	skin
ENCODE	ENCSR301SLO	skin
ENCODE	ENCSR461NFO	skin
ENCODE	ENCSR604PTS	skin
GEO	GSM3074480	blood
GEO	GSM3074481	blood
GEO	GSM3074482	blood
GEO	GSM3074483	blood
GEO	GSM3074484	blood
GEO	GSM3074485	blood
GEO	GSM2942383	brain
GEO	GSM2942384	brain

## Sheet: Fig1c_5000_variab_me_probes
cg24685755
cg24703168
cg14007004
cg27025752
cg14919250
cg20883544
cg19205994
cg11167845
cg20314038
cg22685369
cg13788027
cg13834844
cg08862035
cg19356905
cg27595997
cg26946978
cg06051032
cg14894648
cg15318396
cg15097762
cg24559983
cg23024411
cg18963906
cg19235339
cg06812977
cg11861709
cg10548492
cg26505959
cg12997953
cg25345647
cg15695648
cg14279493
cg08676730
cg10222823
cg26057104
cg00089464
cg05542661
cg14629287
cg00368059
cg06870995
cg23572228
cg23097143
cg23383871
cg06710937
cg26067518
cg07722368
cg12045833
cg19163194
cg13973054
cg26968809
cg08772194
cg07954885
cg23656959
cg18405539
cg04737542
cg13921324
cg16665068
cg10178263
cg01556502
cg19707040
cg23720732
cg26239391
cg24895834
cg18115215
cg19633231
cg12927498
cg22481028
cg09149648
cg23193410
cg17971936
cg09231514
cg21600537
cg22490255
cg22111038
cg05471523
cg01510813
cg03602730
cg09485007
cg23089838
cg26114642
cg00995798
cg00714184
cg05356308
cg12624829
cg14034757
cg24079361
cg08839858
cg06560760
cg01982516
cg10662787
cg17600129
cg07998070
cg22796749
cg09197895
cg18985581
cg21940568
cg02877791
cg07641567
cg04430797
cg10427140
cg21732260
cg01638397
cg08228715
cg20818095
cg24821313
cg24171294
cg02513924
cg05468346
cg17722319
cg21162026
cg03651852
cg16716518
cg14658948
cg24932925
cg21512771
cg00283284
cg09364328
cg00221745
cg20683565
cg24403578
cg03271354
cg17839314
cg02642223
cg00353411
cg11843700
cg26260201
cg03479529
cg17432620
cg01370063
cg13262893
cg03826668
cg07767963
cg09046813
cg11190233
cg15623503
cg00680572
cg05302416
cg24297727
cg18505495
cg16662989
cg07111005
cg02429459
cg02727444
cg18879160
cg05593349
cg13323825
cg02365514
cg12708677
cg11302884
cg03307893
cg22521696
cg10701051
cg14024653
cg20563910
cg25998402
cg16328342
cg12387713
cg02031245
cg26150071
cg09051775
cg03874089
cg22578667
cg14058754
cg05897886
cg12309225
cg10313675
cg12338493
cg12858300
cg27167413
cg00042144
cg09806118
cg20169702
cg17524017
cg20418312
cg19568591
cg20670085
cg03071143
cg16234907
cg06429617
cg03970350
cg22542751
cg03816207
cg11269819
cg19075346
cg27028168
cg21918073
cg14596866
cg25705486
cg12026729
cg02996413
cg22141456
cg16474170
cg24973298
cg07194093
cg09911521
cg14694342
cg19275261
cg24496223
cg18425786
cg13202845
cg26365690
cg02344943
cg01869731
cg16304950
cg24379252
cg19206040
cg19727439
cg11449134
cg02837212
cg02666184
cg08854169
cg21310606
cg09719477
cg22240472
cg27625055
cg15448907
cg08300346
cg19524362
cg02790021
cg08418900
cg19517718
cg21409881
cg23114866
cg14291066
cg09400284
cg26735353
cg15404858
cg03790908
cg15143070
cg22235417
cg09371047
cg23805357
cg13448753
cg08976451
cg09163779
cg00435305
cg03053875
cg25023908
cg20414262
cg02295355
cg06379095
cg15974272
cg09255318
cg14690827
cg06093878
cg13266630
cg23616761
cg27665925
cg10297191
cg16384885
cg02409108
cg23996829
cg25496967
cg25049387
cg01984858
cg19085712
cg19763319
cg21712019
cg04700283
cg06677166
cg06700856
cg16644497
cg04674590
cg06657243
cg24331876
cg20646018
cg25311666
cg19538614
cg17258069
cg04156555
cg19320816
cg10185519
cg05228735
cg05467106
cg03626734
cg05216814
cg02436788
cg25023058
cg09503153
cg17091361
cg15336765
cg08266366
cg09495418
cg00297950
cg16900980
cg09253581
cg22868433
cg15526406
cg26812704
cg00012522
cg17132421
cg24524750
cg00392242
cg18682423
cg09450020
cg05566434
cg09282497
cg12091732
cg18800827
cg22937695
cg11929643
cg10573386
cg10251190
cg02921697
cg02015280
cg12107626
cg07094541
cg19066570
cg07277447
cg22667436
cg02666434
cg15433056
cg27370997
cg15685943
cg17391928
cg20329085
cg13340327
cg07840120
cg04438814
cg02912326
cg00596508
cg27558107
cg13830932
cg16966815
cg15914589
cg23052615
cg13944939
cg21033514
cg24524308
cg06912515
cg08618068
cg04180890
cg16420798
cg24682307
cg17042926
cg09084370
cg16585380
cg07602980
cg22433285
cg21442599
cg10332700
cg23948080
cg00699993
cg21209095
cg04209650
cg19435033
cg22664296
cg25172604
cg01226806
cg08486575
cg08294946
cg17050693
cg07836831
cg03735492
cg13984623
cg17631972
cg25952997
cg18176922
cg11945839
cg18711394
cg11948456
cg27078812
cg11422045
cg11980147
cg17585343
cg04406808
cg22393952
cg14209005
cg08244262
cg16817229
cg16238795
cg25411849
cg09100013
cg01060059
cg11244340
cg18804985
cg04959788
cg23344532
cg18865796
cg05351257
cg26448681
cg19902394
cg24440593
cg03674157
cg08646771
cg03558862
cg22479710
cg18592273
cg11055019
cg18294483
cg12887701
cg00316893
cg19157034
cg17342901
cg21937593
cg07020402
cg08648367
cg22182611
cg24194077
cg25173404
cg26067655
cg06755373
cg03050522
cg13973788
cg07055504
cg02816363
cg04153495
cg13554489
cg22154616
cg08016802
cg22242764
cg20559608
cg20062650
cg03919694
cg20716311
cg04627186
cg04721582
cg21215272
cg01926707
cg05648183
cg17166103
cg21067341
cg20143092
cg03818977
cg06237608
cg02803508
cg20947113
cg16208507
cg08383338
cg27087057
cg13150467
cg09896445
cg22031336
cg02131967
cg18247042
cg18750086
cg18786479
cg16127719
cg07315993
cg21010450
cg00259618
cg23062425
cg22190438
cg16458494
cg04686953
cg18365142
cg23508607
cg08455380
cg16595484
cg10191855
cg03252361
cg23097155
cg03249271
cg19094555
cg03057409
cg27465566
cg07671776
cg25866173
cg23458174
cg27250139
cg24231939
cg24300315
cg11847459
cg01767202
cg26318825
cg06343212
cg21686379
cg24924936
cg00701741
cg20357628
cg12986338
cg27271231
cg13952031
cg12517452
cg22017581
cg12351660
cg22947959
cg12087304
cg10580059
cg16162668
cg14567287
cg00323965
cg14731413
cg10851683
cg17001689
cg20936013
cg24141387
cg22219248
cg16410706
cg09152886
cg25717994
cg01962428
cg04812049
cg13724160
cg07090401
cg18215217
cg23634395
cg26732691
cg22554488
cg21161927
cg20738755
cg01449218
cg22711679
cg00533620
cg03921149
cg00641409
cg25160978
cg26244952
cg27363741
cg08389577
cg26635208
cg22396147
cg18798264
cg10683793
cg01262246
cg15318690
cg02753362
cg08375754
cg06277900
cg18296707
cg15383900
cg03087610
cg06424594
cg20243544
cg15434413
cg03841454
cg12054869
cg04007151
cg23829577
cg06768944
cg10691592
cg09546921
cg18191418
cg00845204
cg18213720
cg17282301
cg03040282
cg23206311
cg08063063
cg00573880
cg13424209
cg15122105
cg08447479
cg22975160
cg11723397
cg22608017
cg02247356
cg18418460
cg27510097
cg11215207
cg27547873
cg14225021
cg26726542
cg20901245
cg05451400
cg15955341
cg14766675
cg01564068
cg03075996
cg21053831
cg16609543
cg04011741
cg19045187
cg14998335
cg23029526
cg24788019
cg16704958
cg27607639
cg04274978
cg10859966
cg15846316
cg26302094
cg06815153
cg26475813
cg08519575
cg08232264
cg15316660
cg25190634
cg10227246
cg18614859
cg13534450
cg05624932
cg04729070
cg26472499
cg13601799
cg08859095
cg18981171
cg26271127
cg04789550
cg19276365
cg02756152
cg02388709
cg26143752
cg10418567
cg03940064
cg04430835
cg03689076
cg25594899
cg12791192
cg00050625
cg05201970
cg07909285
cg01794676
cg18411550
cg07826275
cg21364278
cg23387472
cg16407776
cg04425820
cg19864007
cg03617693
cg22834713
cg27113059
cg18956549
cg25063221
cg22970157
cg21820373
cg26973488
cg10708046
cg27308346
cg00532413
cg03401266
cg26576206
cg00632306
cg14126688
cg06266993
cg01867419
cg13903409
cg10227187
cg10491262
cg13707894
cg15046935
cg17116969
cg18222509
cg23105185
cg15900980
cg14661383
cg03184679
cg14650464
cg19022814
cg13604246
cg16878641
cg07091593
cg12942328
cg16340268
cg04482794
cg07522644
cg15620146
cg05999245
cg16779463
cg26742995
cg00129651
cg06537680
cg23684878
cg16689800
cg24488059
cg02976719
cg06061878
cg25262396
cg25989890
cg19488391
cg12253819
cg02931159
cg08628584
cg01862172
cg04707863
cg22541378
cg10677909
cg25767985
cg01174685
cg03210180
cg02196694
cg00412425
cg18334637
cg26485174
cg01901107
cg26097011
cg22064620
cg02643218
cg10700424
cg15391574
cg07821629
cg18429863
cg24585171
cg17177755
cg01769457
cg24675056
cg21294812
cg15697849
cg05881648
cg12167167
cg16115841
cg10058464
cg13171890
cg05166499
cg20166204
cg24791380
cg17370163
cg15462468
cg17831137
cg25092644
cg14065550
cg10169261
cg25136961
cg11158057
cg04412646
cg26575690
cg23847199
cg20884163
cg07896619
cg18643445
cg08023179
cg12147137
cg07409656
cg21253692
cg11361121
cg20109541
cg14629075
cg24035447
cg02949804
cg00050152
cg20528583
cg02860282
cg05940610
cg22478591
cg21552709
cg16544209
cg09863441
cg23999695
cg26986937
cg09366357
cg21249126
cg06154860
cg12311490
cg09946832
cg18782736
cg26946880
cg11322251
cg07928641
cg01651170
cg02976617
cg23684521
cg11930114
cg20841648
cg09965258
cg13441730
cg01100912
cg17783982
cg16105594
cg12685731
cg22699279
cg11149743
cg08235271
cg18822411
cg26235215
cg15900657
cg13307451
cg24615528
cg23252261
cg24776469
cg16874579
cg05506986
cg24937696
cg26527775
cg00906130
cg26144658
cg18874296
cg02120582
cg03145963
cg10013316
cg20690128
cg05629186
cg03112087
cg11790681
cg22186374
cg12176249
cg07256113
cg04190870
cg11372422
cg01247628
cg20268522
cg15395329
cg10226839
cg02394263
cg00747619
cg16763192
cg18800479
cg20292547
cg15356516
cg20340302
cg25347098
cg05626764
cg24885934
cg01572334
cg10249489
cg15669183
cg07011172
cg15720995
cg05706117
cg26950557
cg14794428
cg01458228
cg08855288
cg23300368
cg23157089
cg17488985
cg26988215
cg20407045
cg19849093
cg20779181
cg03735496
cg22333960
cg08691807
cg00185566
cg16539629
cg06892009
cg06158347
cg08100806
cg02944307
cg02003159
cg06293339
cg19956540
cg02870584
cg15628888
cg02169857
cg09068086
cg01351822
cg17895157
cg26086271
cg23045594
cg01552272
cg04044684
cg25552435
cg19001226
cg11675876
cg16919517
cg18345806
cg05719720
cg19937513
cg10864878
cg05332887
cg13364903
cg04391594
cg14196840
cg05063339
cg23472708
cg04981088
cg22935921
cg17330672
cg22084258
cg09060610
cg25291138
cg19573776
cg08331842
cg19498237
cg25318301
cg08410921
cg10076931
cg21026663
cg08170869
cg04558174
cg07140158
cg16282993
cg22216413
cg01832892
cg01187505
cg23062112
cg08095852
cg27486637
cg26000663
cg07760910
cg16974909
cg25276412
cg00935993
cg01816515
cg20248458
cg20019673
cg09109450
cg03449175
cg00948275
cg11672054
cg13449295
cg21401647
cg19072010
cg12330330
cg04014062
cg09043127
cg27140220
cg15996043
cg18493027
cg10983327
cg11382055
cg20947082
cg03442425
cg03734437
cg05701791
cg10520887
cg01194057
cg20051210
cg14107210
cg03887426
cg24355010
cg20232471
cg09918809
cg11082362
cg14288330
cg14181169
cg20174180
cg06071631
cg01056889
cg02501882
cg21130861
cg25262044
cg24808318
cg02918146
cg14145044
cg15615160
cg22287624
cg21602557
cg09526708
cg25306611
cg16049364
cg20359285
cg26861946
cg17444495
cg00342532
cg08386091
cg25075147
cg26941949
cg00908291
cg05296192
cg09219451
cg03785696
cg00227578
cg17880622
cg12298905
cg14158665
cg20383903
cg17969938
cg20211422
cg14895591
cg14711366
cg18813158
cg09729613
cg20408693
cg23738734
cg07138603
cg23460835
cg00700007
cg04676561
cg22991959
cg02217786
cg04573276
cg07385577
cg00329270
cg23201032
cg05658593
cg11102611
cg16579954
cg23986671
cg07515940
cg00601350
cg25396971
cg27602153
cg19412324
cg01114217
cg01493093
cg00941745
cg21292905
cg05170863
cg05805987
cg07168148
cg13807985
cg09071340
cg06602857
cg05840031
cg21536790
cg09608387
cg16291962
cg05497616
cg25301406
cg18608369
cg01348733
cg14380270
cg26573518
cg05796727
cg06716684
cg16532755
cg11530960
cg13764991
cg13137176
cg17172532
cg25331703
cg24163563
cg03057213
cg13965062
cg00112780
cg27465717
cg15744359
cg03780545
cg21189727
cg06867350
cg13602641
cg26490957
cg23852227
cg18048954
cg18597883
cg25868286
cg06511389
cg08372947
cg25740200
cg18866308
cg10532290
cg19251280
cg18276263
cg07774299
cg19596273
cg20015535
cg03161476
cg13558971
cg20959174
cg10017888
cg04583149
cg08117800
cg26721439
cg14989642
cg11844369
cg13284181
cg16795898
cg01745522
cg27013981
cg18589016
cg15897645
cg01713339
cg06640776
cg05852008
cg04144973
cg05831672
cg24166097
cg06150297
cg26692294
cg25793377
cg16241218
cg26212877
cg06003296
cg22243662
cg23032045
cg11113760
cg02054059
cg26387689
cg10975049
cg24427089
cg10878412
cg18968090
cg13004927
cg04043795
cg26571942
cg17178888
cg18140433
cg04797648
cg10820926
cg12208258
cg25933341
cg13328459
cg05555455
cg18549036
cg04327941
cg12240306
cg10469286
cg11965671
cg09382845
cg10250663
cg26094984
cg07853758
cg05797516
cg06956240
cg15802554
cg05315443
cg00110688
cg25004899
cg08247450
cg14553600
cg04054012
cg16863990
cg04046980
cg09494835
cg19695805
cg02472291
cg02392553
cg25514328
cg19509763
cg06338562
cg11021995
cg08453021
cg22291922
cg24712277
cg09998632
cg17468987
cg07270851
cg24238564
cg22037648
cg18097224
cg03908015
cg00281717
cg16856286
cg25440961
cg22667208
cg16844403
cg08990497
cg12037305
cg05478818
cg11284811
cg22568351
cg04152056
cg08955613
cg21953332
cg10215104
cg04428700
cg04957628
cg05116906
cg23509896
cg06602546
cg04881720
cg09894698
cg05660670
cg16182860
cg11373604
cg17409891
cg09468523
cg18229095
cg18514820
cg20018469
cg02746869
cg20319091
cg09462445
cg25408991
cg20864608
cg24879969
cg16400999
cg06987966
cg22616209
cg19003797
cg16876315
cg01628593
cg14983586
cg14212266
cg02452416
cg00455424
cg11989330
cg13853591
cg09504482
cg01340542
cg05522023
cg10233654
cg17584323
cg01504429
cg27147615
cg02030187
cg19930288
cg22946159
cg12580665
cg23097897
cg19459804
cg03424727
cg14007549
cg19516339
cg18897632
cg15034345
cg17809895
cg26227186
cg12523878
cg05491001
cg12250496
cg13855568
cg23191657
cg08027385
cg06139908
cg14413263
cg24397815
cg23435667
cg07098902
cg03798328
cg06653146
cg12121066
cg02547025
cg16761716
cg14580502
cg16622863
cg24416973
cg18750167
cg24444188
cg14302113
cg04529066
cg11503011
cg01308151
cg17117277
cg13392687
cg00945038
cg07723130
cg03369269
cg10115498
cg02861071
cg26546537
cg07231955
cg05142211
cg21188989
cg00046625
cg07751698
cg26058714
cg13690864
cg25651562
cg26615813
cg14953590
cg22264014
cg26522240
cg04836221
cg21919967
cg08031368
cg03767515
cg24319718
cg22367989
cg25220625
cg10312211
cg26354173
cg26549326
cg25721039
cg18676500
cg14968631
cg05364759
cg08024114
cg17085352
cg20587394
cg07777349
cg20274950
cg10527010
cg09022422
cg07744841
cg18290624
cg08871855
cg07180997
cg26067250
cg02097190
cg08364767
cg02150867
cg05943996
cg18270926
cg16519911
cg15416488
cg24924779
cg23460843
cg25249394
cg09999109
cg19748605
cg18416950
cg18454288
cg26269613
cg13765303
cg14069192
cg25257903
cg17990197
cg21446511
cg12661206
cg08641330
cg10116864
cg23901444
cg02128567
cg08511440
cg07661818
cg13969402
cg22664550
cg03540165
cg11358257
cg02132470
cg09302903
cg05598845
cg20493960
cg17903071
cg02031942
cg26009649
cg03473348
cg07462804
cg16435571
cg12482557
cg18245660
cg10341556
cg21925310
cg23897913
cg13821072
cg27513979
cg20093476
cg24882875
cg08388041
cg13223402
cg27167224
cg26720404
cg17987651
cg24718866
cg17565078
cg16370875
cg20634442
cg26107881
cg16680522
cg09929831
cg06563086
cg00355909
cg14279121
cg23461147
cg03933279
cg13417420
cg13697193
cg22778421
cg24910532
cg17891820
cg18763277
cg24303394
cg17285225
cg00959846
cg24091001
cg17780624
cg00992385
cg09265529
cg22729973
cg00020649
cg19224249
cg19843939
cg25010361
cg11116429
cg13980113
cg21245981
cg11837274
cg13017319
cg24797187
cg03882182
cg12916710
cg01657408
cg18787478
cg16740476
cg24942272
cg20225546
cg13962186
cg21187462
cg06519278
cg10512875
cg03002352
cg27591349
cg09445939
cg26268044
cg21642176
cg20676716
cg04599912
cg09290941
cg03251079
cg04068042
cg18647259
cg18357048
cg08573679
cg01878100
cg03731078
cg00620733
cg01749569
cg01492246
cg27553667
cg07688779
cg00797346
cg21941354
cg21189054
cg10251328
cg20692831
cg21161492
cg13398472
cg11213248
cg13344740
cg05287817
cg06550214
cg25099087
cg08875180
cg02908587
cg04222358
cg18657094
cg25485192
cg20528183
cg05414189
cg13750967
cg26898166
cg15603424
cg12159189
cg26161329
cg08776080
cg20092458
cg21656751
cg13632816
cg00793655
cg08699164
cg27593384
cg11581706
cg11855325
cg03039974
cg09734380
cg01368673
cg15081566
cg00442931
cg13827350
cg02957576
cg10016332
cg07935012
cg23589617
cg21463228
cg18754389
cg15131647
cg16473762
cg26832142
cg10850791
cg02061956
cg08542090
cg18056266
cg27237300
cg10189607
cg24773676
cg18035158
cg11425280
cg23291136
cg20026798
cg15740363
cg06367693
cg09935766
cg05828272
cg08540945
cg01779771
cg19101547
cg10334767
cg14612544
cg01501819
cg04545136
cg00559249
cg20916066
cg20930201
cg02790177
cg06713632
cg03610000
cg14337844
cg21737173
cg19481634
cg22322343
cg01720705
cg23060872
cg26718433
cg15985191
cg26699292
cg18058689
cg15916399
cg07101909
cg04517722
cg12978575
cg00584000
cg20795569
cg02111587
cg19699088
cg13345849
cg27013953
cg08675510
cg00797821
cg03835378
cg10858568
cg13817182
cg18432099
cg20585088
cg16407723
cg22021178
cg06347782
cg19968403
cg14506196
cg22321089
cg11953272
cg23600059
cg08076158
cg05882938
cg03656055
cg15565065
cg13877465
cg21833144
cg05931439
cg01244944
cg01610857
cg13825376
cg06309721
cg25302957
cg08805144
cg19437258
cg19801062
cg15923513
cg20351640
cg16447652
cg21130588
cg17780595
cg06365057
cg23701643
cg16162324
cg03609148
cg07644196
cg21699158
cg03138091
cg07781959
cg06694137
cg25292468
cg12860356
cg26578621
cg05381746
cg13457209
cg03462329
cg05694245
cg11825621
cg16033053
cg26535484
cg23650482
cg01566242
cg15934674
cg09808343
cg25373063
cg10511618
cg19741688
cg23674344
cg17708167
cg10742620
cg25638626
cg04599819
cg17508300
cg23533100
cg09617579
cg13955512
cg22326588
cg18780217
cg13921956
cg25623934
cg11385684
cg15237819
cg19026207
cg06711110
cg11193857
cg21001008
cg21116579
cg15380956
cg19597031
cg23331220
cg08625094
cg11791006
cg26163699
cg25095722
cg19761502
cg21736411
cg14537533
cg07967679
cg25313172
cg09854088
cg21142038
cg06260501
cg16349964
cg22918012
cg02445042
cg04019128
cg04351049
cg10052561
cg24534566
cg09405169
cg20897776
cg25805709
cg08341178
cg08846783
cg22147448
cg09155701
cg25806307
cg02772240
cg14376275
cg11750133
cg11841450
cg19116429
cg27291698
cg11982736
cg13540256
cg24869336
cg21029612
cg19905251
cg25074426
cg02974931
cg11416811
cg13575339
cg25638859
cg25841634
cg00234384
cg19805311
cg16654595
cg03597976
cg26831149
cg21760146
cg18949300
cg13554086
cg15146033
cg05487635
cg25773620
cg12426234
cg14237894
cg26638444
cg02952008
cg11253514
cg23483840
cg15726260
cg06270661
cg26658650
cg00604209
cg09659004
cg22889755
cg26337020
cg26241363
cg02440668
cg08258259
cg20232102
cg22730305
cg09302274
cg11827837
cg09423703
cg09871471
cg02803914
cg14022711
cg15139685
cg02300724
cg15516288
cg03227148
cg02564134
cg02883595
cg18960642
cg22366279
cg10985479
cg02470625
cg09754413
cg00528932
cg05962239
cg03645547
cg20518115
cg10518439
cg05659242
cg05898102
cg27630885
cg12239342
cg21471956
cg18589481
cg09339462
cg13332474
cg10096161
cg26234721
cg25106322
cg06634473
cg20093099
cg20602026
cg11942956
cg05085230
cg22093531
cg00162401
cg22537474
cg14851482
cg21906038
cg11284316
cg13852218
cg18034232
cg18899952
cg09574819
cg24512400
cg01012669
cg23122109
cg14580567
cg26978698
cg11262757
cg26654994
cg09249112
cg23076299
cg06305488
cg08737094
cg22635008
cg11576834
cg16541852
cg09158745
cg24809872
cg13522244
cg15743922
cg00309339
cg18326365
cg22454401
cg14358084
cg26740856
cg10667877
cg04711998
cg27558234
cg11058154
cg22235160
cg07763047
cg13919438
cg25481073
cg23226129
cg03377355
cg07263475
cg18015746
cg27307781
cg16719517
cg01159543
cg01962969
cg21585733
cg03182967
cg09564101
cg22571530
cg15378492
cg13140338
cg10087973
cg01519897
cg06780705
cg17614974
cg07408835
cg20978694
cg07456645
cg14047019
cg23440413
cg16174029
cg10970409
cg19669078
cg18341512
cg13686857
cg12579867
cg17778382
cg03053427
cg14705099
cg25855721
cg01310881
cg15166311
cg19818722
cg25024516
cg13546954
cg04010091
cg03314195
cg05947699
cg02199397
cg11223573
cg06721528
cg22030684
cg23614791
cg26272220
cg05143887
cg02851087
cg21754400
cg01283289
cg02659086
cg03817939
cg12838436
cg19850959
cg20167126
cg07164581
cg01169726
cg03616377
cg09324514
cg22983529
cg21433768
cg04237898
cg12494180
cg06417237
cg04768939
cg01185682
cg09434781
cg02383154
cg03200166
cg16409049
cg23241335
cg21923948
cg06902669
cg11872321
cg00812921
cg23236554
cg27619031
cg19430967
cg06102403
cg19841859
cg18768621
cg15378219
cg16415785
cg07861258
cg15225201
cg17271428
cg00467600
cg02378847
cg03646889
cg08165784
cg17993027
cg19170015
cg09211701
cg12410692
cg16432022
cg23658834
cg13694461
cg18276069
cg13973820
cg16863375
cg15594967
cg17073392
cg20532999
cg22502570
cg03936844
cg11119419
cg00149473
cg17773349
cg23718462
cg19007200
cg03334425
cg08210629
cg06748143
cg11866674
cg23848433
cg11898009
cg26418363
cg05924445
cg15680624
cg24374738
cg13141009
cg06508320
cg03778029
cg02545294
cg12974637
cg12354566
cg13966878
cg09841488
cg05990549
cg21596317
cg10640944
cg05587118
cg08289063
cg27209395
cg01824964
cg20659418
cg22126440
cg24889802
cg15868565
cg10569615
cg04450862
cg00270408
cg20255775
cg11721803
cg23142394
cg09963640
cg21244408
cg22843663
cg01436608
cg10664112
cg01015652
cg05830141
cg20728105
cg10194812
cg21526847
cg06899530
cg04346113
cg25046074
cg22674613
cg03400828
cg16375948
cg14254380
cg21657955
cg19346645
cg25599538
cg16306190
cg27536453
cg23216292
cg16115720
cg21455438
cg02048505
cg02515468
cg07576175
cg19570545
cg17463149
cg09472802
cg27033036
cg00158683
cg23387384
cg21609684
cg04255268
cg09136101
cg10542098
cg26144437
cg04829853
cg21653132
cg20501697
cg22638593
cg21884421
cg13054224
cg04057016
cg17755907
cg10944735
cg09952395
cg01967055
cg26892115
cg12567310
cg09310891
cg00172597
cg12918457
cg24266670
cg18237323
cg21510892
cg04988476
cg05867626
cg23346773
cg10151685
cg15524516
cg05093325
cg17489086
cg03359964
cg04571321
cg05471297
cg01416388
cg16530177
cg07773272
cg04953552
cg08185241
cg10671306
cg24933191
cg14824901
cg27176828
cg13782932
cg09072408
cg17440907
cg07354927
cg08625380
cg11718235
cg20004406
cg06616879
cg03404279
cg16862641
cg08497530
cg26924496
cg06185738
cg04595983
cg23601376
cg00349776
cg08138435
cg25240814
cg25167838
cg22437161
cg13306216
cg09953239
cg12691631
cg27182172
cg15642292
cg21831898
cg21715963
cg10055771
cg24978679
cg23667362
cg06823991
cg05274534
cg24140204
cg06367925
cg04960781
cg26527638
cg14599233
cg23918507
cg00063744
cg14055957
cg25104124
cg13299477
cg17237063
cg01038750
cg24134845
cg19472078
cg23820770
cg04228402
cg07964553
cg23542495
cg02741554
cg17268882
cg26131754
cg27634695
cg04701420
cg04513185
cg12745769
cg07608032
cg15310270
cg18331880
cg02976568
cg01331335
cg02871614
cg01313518
cg16274098
cg00288584
cg06845943
cg25180801
cg12091376
cg18977999
cg10232654
cg15267702
cg11814567
cg18723341
cg12592635
cg15291914
cg05470310
cg12463851
cg19216563
cg10548807
cg16927871
cg03428864
[truncated: 3,000 more rows]

## Sheet: Fig1c_146385_unme_probes
cg00000622
cg00000734
cg00000769
cg00000905
cg00000974
cg00001245
cg00001582
cg00001583
cg00001594
cg00001747
cg00002028
cg00002116
cg00002236
cg00002406
cg00002464
cg00002490
cg00002559
cg00002660
cg00002719
cg00002810
cg00002934
cg00003036
cg00003091
cg00003173
cg00003202
cg00003298
cg00003407
cg00003555
cg00003784
cg00003994
cg00004055
cg00004207
cg00004818
cg00004939
cg00005010
cg00005040
cg00005077
cg00005306
cg00005543
cg00006032
cg00006122
cg00006414
cg00006884
cg00006948
cg00007032
cg00007226
cg00007269
cg00007300
cg00007644
cg00007898
cg00007981
cg00008004
cg00008033
cg00008036
cg00008387
cg00008647
cg00008713
cg00009167
cg00009214
cg00009292
cg00009364
cg00009407
cg00009412
cg00010046
cg00010168
cg00010266
cg00010533
cg00010947
cg00010992
cg00011122
cg00011247
cg00011284
cg00011578
cg00011740
cg00012036
cg00012126
cg00012199
cg00012203
cg00012386
cg00012397
cg00012469
cg00012522
cg00012701
cg00012762
cg00012992
cg00013386
cg00013409
cg00013410
cg00013475
cg00013655
cg00014085
cg00014112
cg00014272
cg00014285
cg00014289
cg00014327
cg00014806
cg00014986
cg00014996
cg00015058
cg00015219
cg00015791
cg00015991
cg00016066
cg00016156
cg00016223
cg00016498
cg00016841
cg00017002
cg00017033
cg00017188
cg00017441
cg00018024
cg00018524
cg00018557
cg00019093
cg00019137
cg00019141
cg00019301
cg00019377
cg00019809
cg00020052
cg00020191
cg00020297
cg00020622
cg00020649
cg00020720
cg00020807
cg00021028
cg00021108
cg00021166
cg00021237
cg00021350
cg00021527
cg00021539
cg00021540
cg00021558
cg00021576
cg00021783
cg00021944
cg00021945
cg00022138
cg00022218
cg00022308
cg00022492
cg00022633
cg00022642
cg00023001
cg00023056
cg00023132
cg00023168
cg00023185
cg00023197
cg00023233
cg00023288
cg00023526
cg00023695
cg00024086
cg00024244
cg00024280
cg00024396
cg00024404
cg00024472
cg00024701
cg00024722
cg00024790
cg00024812
cg00025138
cg00025436
cg00025877
cg00025981
cg00026030
cg00026104
cg00026230
cg00026374
cg00026472
cg00026570
cg00026729
cg00026731
cg00026853
cg00026974
cg00027083
cg00027499
cg00027745
cg00027808
cg00028184
cg00028455
cg00028487
cg00028636
cg00028749
cg00028829
cg00028870
cg00028881
cg00028918
cg00029161
cg00029233
cg00029397
cg00029812
cg00029822
cg00029826
cg00029831
cg00030291
cg00030423
cg00030795
cg00030816
cg00030959
cg00031165
cg00031303
cg00031340
cg00031443
cg00031456
cg00031476
cg00031663
cg00032227
cg00032336
cg00032756
cg00032789
cg00032805
cg00032852
cg00033127
cg00033220
cg00033457
cg00033533
cg00033643
cg00033668
cg00034019
cg00034039
cg00034076
cg00034130
cg00034360
cg00034376
cg00034416
cg00034433
cg00034555
cg00035237
cg00035249
cg00035389
cg00035453
cg00035623
cg00035812
cg00035945
cg00036114
cg00036115
cg00036299
cg00036328
cg00036386
cg00036440
cg00036664
cg00037058
cg00037153
cg00037186
cg00037388
cg00037400
cg00037635
cg00038436
cg00039044
cg00039177
cg00039385
cg00039441
cg00039505
cg00039564
cg00039627
cg00039649
cg00039793
cg00039794
cg00040007
cg00040008
cg00040367
cg00040380
cg00040423
cg00040569
cg00040861
cg00040873
cg00040945
cg00041084
cg00041328
cg00041759
cg00041901
cg00042144
cg00042335
cg00042356
cg00042637
cg00042874
cg00043095
cg00043265
cg00043371
cg00043379
cg00043819
cg00044050
cg00044170
cg00044245
cg00044289
cg00044430
cg00044463
cg00044968
cg00045061
cg00045190
cg00045303
cg00045439
cg00045763
cg00045967
cg00046018
cg00046041
cg00046499
cg00046537
cg00046560
cg00046625
cg00046710
cg00046744
cg00046815
cg00046913
cg00047050
cg00047469
cg00047844
cg00048178
cg00048420
cg00048746
cg00048823
cg00048832
cg00049033
cg00049047
cg00049253
cg00049286
cg00049382
cg00049411
cg00049502
cg00049718
cg00049914
cg00049973
cg00050034
cg00050152
cg00050247
cg00050590
cg00050625
cg00050629
cg00050984
cg00051068
cg00051179
cg00051546
cg00051595
cg00051782
cg00051979
cg00052290
cg00052422
cg00052550
cg00052626
cg00053010
cg00053292
cg00053373
cg00053507
cg00053661
cg00054511
cg00054692
cg00054702
cg00054706
cg00054791
cg00055049
cg00055557
cg00055595
cg00055848
cg00056202
cg00056578
cg00056624
cg00056628
cg00056676
cg00056767
cg00056985
cg00057317
cg00057393
cg00057569
cg00057661
cg00057676
cg00057700
cg00057880
cg00058113
cg00058299
cg00058329
cg00058527
cg00058771
cg00058786
cg00059024
cg00059053
cg00059424
cg00059510
cg00059740
cg00059911
cg00060287
cg00060304
cg00060320
cg00060403
cg00060762
cg00060880
cg00061086
cg00061145
cg00061264
cg00061309
cg00061769
cg00061989
cg00062312
cg00063066
cg00063077
cg00063174
cg00063279
cg00063471
cg00063567
cg00063649
cg00063703
cg00063744
cg00063945
cg00064051
cg00064218
cg00064235
cg00064284
cg00064347
cg00064415
cg00064950
cg00065071
cg00065215
cg00065408
cg00065598
cg00065726
cg00065919
cg00065921
cg00066198
cg00066449
cg00066468
cg00066499
cg00066671
cg00066942
cg00067018
cg00067102
cg00067126
cg00067365
cg00067576
cg00067814
cg00068155
cg00068305
cg00068408
cg00068503
cg00068621
cg00068622
cg00069017
cg00069242
cg00069261
cg00069314
cg00070043
cg00070680
cg00070814
cg00071751
cg00071998
cg00072099
cg00072216
cg00072317
cg00072369
cg00072711
cg00072891
cg00073380
cg00073716
cg00073771
cg00073780
cg00073869
cg00074132
cg00074184
cg00074244
cg00074853
cg00075019
cg00075192
cg00075589
cg00075634
cg00075768
cg00076056
cg00076152
cg00076307
cg00076353
cg00076497
cg00076645
cg00076854
cg00076998
cg00077017
cg00077516
cg00077586
cg00077606
cg00077717
cg00077805
cg00078130
cg00078221
cg00078318
cg00078334
cg00078940
cg00078968
cg00079076
cg00079216
cg00079563
cg00079638
cg00079891
cg00080012
cg00080059
cg00080118
cg00080123
cg00080312
cg00080393
cg00081251
cg00081270
cg00081445
cg00081574
cg00081666
cg00081935
cg00081975
cg00082182
cg00082310
cg00082426
cg00082491
cg00082664
cg00082713
cg00082739
cg00082874
cg00083059
cg00083139
cg00083194
cg00083765
cg00084669
cg00084687
cg00084888
cg00085029
cg00085800
cg00085830
cg00086266
cg00086297
cg00086670
cg00086809
cg00086871
cg00087005
cg00087098
cg00087195
cg00087273
cg00087298
cg00087728
cg00087799
cg00087906
cg00088026
cg00088130
cg00088227
cg00088264
cg00088282
cg00088299
cg00089091
cg00089101
cg00089224
cg00089353
cg00089372
cg00089464
cg00089798
cg00090619
cg00090648
cg00090731
cg00090767
cg00090800
cg00090865
cg00090936
cg00091044
cg00091129
cg00091285
cg00091483
cg00091596
cg00091781
cg00091964
cg00091986
cg00092273
cg00092287
cg00092389
cg00092611
cg00092967
cg00093058
cg00093815
cg00093890
cg00093900
cg00094036
cg00094155
cg00094256
cg00094739
cg00094851
cg00094858
cg00094901
cg00095027
cg00095463
cg00095493
cg00095594
cg00095608
cg00095674
cg00095678
cg00095976
cg00096440
cg00096845
cg00097081
cg00097146
cg00097225
cg00097228
cg00097536
cg00097539
cg00097573
cg00097626
cg00097647
cg00097940
cg00098063
cg00098112
cg00098239
cg00098280
cg00098553
cg00098673
cg00098693
cg00098718
cg00098814
cg00099023
cg00099091
cg00099216
cg00099393
cg00099441
cg00099712
cg00099768
cg00099835
cg00100399
cg00100428
cg00100436
cg00100800
cg00101115
cg00101118
cg00101453
cg00101693
cg00101895
cg00101986
cg00102023
cg00102176
cg00102561
cg00102808
cg00102841
cg00102920
cg00103132
cg00103685
cg00103783
cg00103984
cg00104086
cg00104131
cg00104267
cg00104484
cg00104570
cg00104839
cg00105470
cg00106073
cg00106074
cg00106211
cg00106250
cg00106420
cg00106499
cg00106501
cg00106744
cg00106765
cg00106942
cg00107016
cg00107603
cg00107606
cg00107632
cg00107682
cg00107782
cg00107819
cg00108222
cg00108277
cg00108569
cg00108850
cg00109300
cg00109356
cg00109465
cg00109503
cg00109643
cg00109780
cg00109797
cg00110191
cg00110192
cg00110578
cg00110623
cg00110675
cg00110688
cg00110982
cg00111040
cg00111157
cg00111253
cg00111359
cg00111436
cg00111893
cg00112056
cg00112251
cg00112517
cg00112780
cg00113051
cg00113208
cg00113363
cg00113554
cg00113814
cg00113951
cg00114008
cg00114084
cg00114383
cg00114724
cg00114944
cg00114963
cg00115040
cg00115101
cg00115180
cg00115313
cg00115629
cg00115980
cg00115984
cg00116058
cg00116234
cg00116412
cg00116463
cg00116554
cg00116628
cg00116688
cg00116882
cg00116946
cg00117463
cg00117536
cg00117600
cg00117913
cg00118103
cg00118442
cg00118468
cg00118684
cg00118719
cg00119011
cg00119057
cg00119079
cg00119117
cg00119181
cg00119197
cg00119986
cg00120096
cg00120210
cg00120948
cg00120998
cg00121147
cg00121158
cg00121209
cg00121525
cg00121533
cg00121562
cg00121634
cg00121640
cg00122215
cg00122254
cg00122310
cg00122362
cg00122840
cg00122941
cg00122951
cg00123035
cg00123055
cg00123094
cg00123486
cg00123512
cg00123704
cg00123800
cg00124011
cg00124160
cg00124175
cg00124432
cg00124488
cg00124774
cg00124905
cg00125159
cg00125406
cg00125414
cg00125757
cg00126034
cg00126320
cg00126739
cg00126948
cg00126959
cg00127047
cg00127167
cg00127214
cg00127424
cg00127505
cg00127545
cg00127591
cg00127732
cg00127894
cg00128188
cg00128195
cg00128361
cg00128530
cg00128654
cg00128702
cg00128732
cg00128805
cg00128877
cg00128883
cg00129132
cg00129158
cg00129196
cg00129269
cg00129453
cg00129481
cg00129651
cg00129731
cg00129774
cg00130039
cg00130275
cg00130309
cg00130569
cg00131372
cg00131618
cg00131899
cg00131958
cg00132108
cg00132418
cg00132584
cg00132616
cg00133122
cg00133595
cg00133654
cg00133698
cg00133909
cg00134028
cg00134212
cg00134776
cg00134812
cg00134843
cg00134887
cg00135056
cg00135815
cg00136105
cg00136192
cg00136311
cg00136643
cg00136736
cg00136739
cg00136947
cg00137135
cg00137156
cg00137209
cg00137314
cg00137416
cg00137585
cg00137634
cg00137652
cg00137828
cg00138267
cg00138474
cg00138497
cg00138525
cg00138641
cg00138712
cg00139037
cg00139244
cg00139807
cg00139920
cg00140191
cg00140235
cg00140304
cg00140403
cg00140479
cg00140501
cg00140502
cg00140813
cg00140842
cg00140910
cg00141143
cg00141174
cg00141479
cg00141522
cg00141548
cg00142106
cg00142150
cg00142266
cg00142624
cg00142735
cg00142759
cg00142925
cg00143045
cg00143387
cg00143623
cg00143700
cg00143868
cg00144161
cg00144186
cg00144465
cg00144550
cg00144701
cg00145177
cg00145489
cg00145587
cg00145849
cg00145979
cg00146096
cg00146460
cg00146695
cg00146698
cg00146821
cg00146837
cg00146919
cg00147009
cg00147126
cg00147339
cg00147424
cg00147976
cg00148666
cg00148881
cg00149397
cg00149473
cg00149585
cg00149659
cg00149976
cg00150500
cg00150714
cg00150737
cg00150882
cg00151525
cg00151571
cg00151607
cg00151788
cg00151810
cg00151914
cg00151919
cg00152008
cg00152175
cg00152577
cg00152768
cg00152838
cg00152978
cg00153106
cg00153110
cg00153570
cg00153662
cg00153856
cg00153934
cg00154064
cg00154189
cg00154333
cg00154366
cg00154443
cg00154549
cg00154746
cg00154968
cg00154982
cg00155052
cg00155167
cg00155314
cg00155397
cg00155423
cg00155429
cg00155485
cg00155504
cg00155514
cg00155593
cg00155609
cg00155622
cg00155700
cg00156216
cg00156336
cg00156744
cg00156964
cg00157456
cg00157722
cg00157755
cg00157796
cg00157855
cg00157930
cg00157987
cg00158254
cg00158333
cg00158528
cg00158683
cg00159100
cg00159212
cg00159370
cg00159400
cg00159442
cg00159658
cg00160001
cg00160183
cg00160368
cg00160818
cg00161024
cg00161229
cg00161931
cg00161968
cg00161970
cg00162206
cg00162231
cg00162348
cg00162401
cg00162541
cg00162643
cg00162751
cg00162940
cg00163037
cg00163365
cg00163419
cg00163481
cg00164150
cg00164196
cg00164235
cg00164390
cg00164542
cg00164727
cg00164898
cg00165011
cg00165323
cg00165535
cg00165862
cg00165888
cg00165981
cg00166030
cg00166213
cg00166216
cg00166327
cg00166635
cg00166706
cg00166741
cg00166785
cg00166995
cg00167273
cg00167491
cg00167504
cg00167539
cg00167654
cg00167922
cg00167941
cg00168009
cg00168082
cg00168205
cg00168514
cg00168815
cg00169164
cg00169175
cg00169305
cg00169373
cg00169412
cg00169569
cg00169633
cg00169917
cg00170056
cg00170188
cg00170213
cg00170343
cg00170564
cg00170796
cg00170973
cg00171084
cg00171126
cg00171161
cg00171203
cg00171421
cg00171436
cg00171556
cg00171565
cg00171599
cg00171725
cg00171785
cg00171983
cg00172020
cg00172270
cg00172330
cg00172371
cg00172408
cg00172597
cg00173010
cg00173141
cg00173405
cg00173435
cg00173623
cg00173667
cg00173785
cg00173787
cg00173854
cg00174096
cg00174230
cg00174421
cg00174466
cg00174918
cg00175344
cg00175859
cg00175980
cg00176491
cg00176496
cg00176709
cg00177013
cg00177101
cg00177390
cg00177436
cg00177451
cg00177632
cg00177698
cg00177797
cg00177923
cg00178149
cg00178356
cg00178429
cg00178437
cg00178511
cg00178790
cg00179014
cg00179078
cg00179087
cg00179128
cg00179217
cg00179328
cg00179423
cg00179787
cg00180012
cg00180277
cg00180932
cg00181054
cg00181116
cg00181125
cg00181527
cg00181968
cg00182294
cg00182534
cg00182998
cg00183107
cg00183186
cg00183355
cg00183647
cg00183742
cg00183804
cg00183916
cg00183957
cg00184235
cg00184876
cg00184884
cg00184893
cg00185566
cg00185622
cg00185634
cg00185839
cg00185850
cg00185912
cg00186034
cg00186141
cg00186383
cg00186414
cg00187414
cg00187614
cg00187635
cg00187671
cg00187828
cg00187987
cg00188298
cg00188450
cg00188503
cg00188547
cg00188746
cg00188822
cg00189117
cg00189220
cg00189457
cg00189906
cg00190186
cg00190319
cg00190321
cg00190596
cg00190674
cg00191100
cg00191178
cg00191477
cg00191491
cg00191629
cg00191882
cg00192533
cg00192856
cg00192962
cg00193021
cg00193490
cg00194186
cg00194207
cg00194321
cg00194374
cg00194465
cg00194681
cg00195179
cg00195218
cg00196012
cg00196167
cg00196372
cg00196387
cg00196414
cg00196440
cg00196451
cg00196671
cg00196787
cg00196810
cg00196983
cg00197313
cg00197381
cg00197495
cg00197641
cg00197681
cg00197692
cg00198102
cg00198603
cg00199048
cg00199084
cg00199846
cg00200063
cg00200074
cg00200289
cg00200298
cg00201175
cg00201185
cg00201321
cg00201414
cg00201445
cg00201670
cg00202130
cg00202249
cg00202403
cg00202530
cg00202702
cg00203035
cg00203089
cg00203291
cg00203456
cg00203461
cg00203463
cg00203594
cg00203617
cg00204390
cg00204501
cg00204645
cg00205263
cg00205485
cg00205527
cg00205658
cg00206052
cg00207389
cg00207534
cg00207636
cg00207865
cg00207926
cg00207965
cg00208116
cg00208153
cg00208310
cg00208412
cg00208461
cg00209424
cg00209622
cg00210002
cg00210098
cg00210144
cg00210204
cg00210473
cg00210596
cg00210842
cg00210994
cg00211110
cg00211601
cg00211648
cg00211661
cg00211719
cg00211800
cg00212272
cg00212909
cg00212988
cg00213004
cg00213479
cg00213714
cg00213828
cg00213967
cg00214056
cg00214165
cg00214294
cg00214346
cg00214530
cg00214855
cg00215350
cg00215801
cg00216044
cg00216056
cg00216116
cg00216361
cg00216523
cg00216659
cg00216758
cg00216831
cg00217298
cg00217444
cg00217971
cg00218103
cg00218146
cg00218631
cg00218649
cg00218742
cg00219330
cg00219543
cg00219578
cg00219833
cg00220389
cg00220492
cg00220737
cg00220769
cg00220905
cg00220952
cg00220955
cg00221035
cg00221070
cg00221327
cg00221357
cg00221394
cg00221525
cg00221625
cg00221745
cg00221969
cg00222291
cg00222601
cg00222690
cg00222982
cg00222995
cg00223186
cg00223648
cg00223900
cg00223950
cg00224057
cg00224126
cg00224299
cg00224312
cg00224508
cg00224563
cg00224671
cg00224911
cg00225070
cg00225144
cg00225553
cg00225576
cg00225765
cg00226306
cg00226545
cg00226608
cg00226754
cg00226931
cg00227225
cg00227490
cg00227578
cg00227662
cg00227781
cg00228018
cg00228444
cg00228799
cg00228948
cg00229039
cg00229232
cg00229245
cg00229368
cg00229423
cg00230271
cg00230302
cg00230368
cg00230631
cg00230665
cg00230700
cg00230869
cg00230899
cg00231006
cg00231140
cg00231405
cg00231422
cg00231521
cg00231618
cg00231855
cg00231920
cg00232685
cg00232735
cg00232874
cg00233079
cg00233687
cg00234293
cg00234384
cg00234446
cg00234462
cg00234608
cg00234624
cg00234691
cg00235260
cg00235367
cg00235645
cg00235865
cg00235933
cg00236225
cg00236406
cg00236696
cg00236831
cg00236924
cg00237386
cg00237565
cg00237631
cg00238137
cg00238318
cg00238446
cg00238770
cg00238897
cg00238994
cg00239003
cg00239061
cg00239394
cg00239467
cg00239654
cg00239685
cg00239870
cg00240432
cg00240442
cg00240539
cg00240569
cg00240734
cg00241085
cg00241355
cg00241922
cg00241998
cg00242147
cg00242264
cg00242285
cg00242299
cg00242478
cg00242597
cg00243184
cg00243313
cg00243547
cg00243574
cg00243731
cg00243897
cg00243922
cg00243952
cg00244006
cg00244310
cg00244392
cg00244524
cg00244634
cg00244654
cg00244745
cg00244882
cg00244979
cg00244983
cg00245192
cg00245538
cg00245635
cg00245789
cg00246041
cg00246366
cg00246386
cg00246817
cg00246932
cg00247020
cg00247315
cg00247489
cg00247599
cg00247748
cg00248310
cg00248638
cg00249030
cg00249181
cg00249632
cg00249997
cg00250422
cg00250500
cg00250524
cg00250711
cg00250811
cg00251250
cg00251271
cg00251519
cg00251536
cg00251610
cg00251705
cg00251738
cg00252282
cg00252332
cg00252422
cg00252654
cg00252701
cg00253204
cg00253403
cg00253555
cg00253851
cg00254079
cg00254133
cg00254480
cg00254868
cg00254886
cg00254978
cg00255142
cg00255405
cg00255719
cg00255811
cg00255837
cg00255853
cg00255921
cg00255925
cg00256076
cg00256155
cg00256166
cg00256281
cg00256374
cg00256745
cg00256767
cg00256785
cg00256923
cg00257047
cg00257202
cg00257271
cg00257474
cg00257542
cg00257704
cg00257786
cg00258132
cg00258550
cg00258597
cg00258694
cg00258805
cg00258937
cg00258976
cg00259618
cg00259785
cg00259882
cg00259887
cg00259966
cg00260114
cg00260437
cg00260634
cg00260647
cg00260655
cg00260715
cg00260857
cg00260888
cg00260914
cg00260919
cg00261149
cg00261430
cg00261534
cg00261552
cg00261553
cg00261688
cg00261781
cg00261942
cg00262031
cg00262122
cg00262280
cg00262357
cg00262368
cg00262415
cg00262776
cg00262850
cg00263210
cg00263584
cg00263592
cg00264142
cg00264208
cg00264346
cg00264380
cg00264433
cg00264591
cg00265212
cg00265238
cg00265317
cg00265415
cg00265442
cg00265490
cg00265512
cg00265578
cg00265634
cg00265769
cg00265863
cg00266009
cg00266322
cg00266715
cg00266983
cg00267012
cg00267054
cg00267422
cg00267482
cg00267596
cg00267751
cg00268009
cg00268019
cg00268338
cg00268409
cg00268518
cg00268840
cg00269115
cg00269416
cg00269643
cg00270291
cg00270311
cg00270408
cg00270497
cg00270507
cg00270563
cg00270594
cg00270778
cg00271154
cg00271207
cg00271522
cg00271633
cg00271682
cg00271925
cg00272200
cg00272951
cg00273383
cg00274279
cg00274399
cg00274550
cg00274587
cg00275181
cg00275232
cg00275557
cg00275577
cg00275645
cg00275962
cg00276377
cg00276532
cg00276606
cg00276792
cg00276797
cg00276826
cg00277263
cg00277329
cg00277358
cg00277797
cg00277827
cg00277891
cg00277898
cg00277996
cg00277997
cg00278028
cg00278131
cg00278158
cg00278692
cg00278753
cg00279001
cg00279054
cg00279392
cg00279708
cg00280163
cg00280502
cg00280548
cg00280758
cg00280761
cg00280915
cg00280922
cg00280928
cg00280991
cg00281080
cg00281152
cg00281153
cg00281467
cg00281600
cg00281717
cg00281842
cg00281967
cg00281977
cg00282249
cg00282347
cg00282626
cg00282683
cg00283111
cg00283284
cg00283576
cg00284005
cg00284146
cg00284173
cg00284249
cg00284328
cg00284438
cg00285026
cg00285060
cg00285314
cg00285319
cg00285363
cg00285483
cg00285829
cg00285950
cg00286214
cg00286621
cg00286984
cg00286986
cg00287312
cg00287322
cg00287370
cg00287636
cg00287711
cg00287829
cg00287831
cg00288050
cg00288280
cg00288327
cg00288562
cg00288584
cg00288824
cg00288933
cg00289052
cg00289081
cg00289084
cg00289125
cg00289429
cg00289485
cg00289546
cg00290028
cg00290506
cg00290605
cg00290636
cg00290924
cg00290974
cg00291003
cg00291136
cg00291351
cg00291424
cg00291877
cg00291981
cg00292047
cg00292087
cg00292435
cg00292568
cg00292637
cg00292662
cg00292664
cg00292857
cg00292986
cg00293012
cg00293245
cg00293409
cg00293631
cg00293936
cg00294096
cg00294419
cg00294572
cg00294658
cg00294823
cg00294898
cg00295206
cg00295421
cg00295448
cg00295572
cg00295604
cg00295794
cg00295835
cg00295887
cg00295948
cg00296079
cg00296080
cg00296121
cg00296158
cg00296189
cg00296279
cg00296291
cg00296501
cg00296938
cg00297680
cg00297737
cg00297767
cg00297950
cg00298020
cg00298025
cg00298241
cg00298481
cg00298675
cg00298796
cg00298883
cg00298910
cg00299052
cg00299257
cg00299418
cg00299830
cg00300039
cg00300090
cg00300664
cg00300750
cg00300822
cg00300859
cg00301172
cg00301601
cg00301775
cg00301864
cg00302081
cg00302195
cg00302521
cg00302533
cg00302793
cg00303548
cg00303672
cg00303723
cg00303776
cg00304072
cg00304388
cg00304629
cg00304646
cg00304673
cg00304823
cg00305046
cg00305188
cg00305374
cg00306090
cg00306198
cg00306298
cg00306350
cg00306421
cg00306426
cg00306532
cg00306905
cg00306992
cg00307073
cg00307266
cg00307483
cg00308133
cg00308344
cg00308767
cg00308909
cg00308984
cg00309056
cg00309106
cg00309178
cg00309339
cg00309462
cg00309582
cg00309650
cg00310215
cg00310257
cg00310855
cg00310968
cg00311046
cg00311113
cg00311654
cg00312474
cg00312919
cg00313219
cg00313284
cg00313401
cg00313642
cg00313857
cg00313973
cg00314018
cg00314230
cg00314240
cg00314386
cg00314750
cg00314771
cg00314966
cg00315056
cg00315154
cg00315391
cg00315775
cg00315781
cg00315936
cg00316328
cg00316483
cg00316602
cg00316677
cg00316828
cg00316893
cg00317648
cg00317680
cg00318000
cg00318157
cg00318242
cg00318320
cg00318380
cg00318608
cg00318618
cg00318766
cg00318799
cg00318865
cg00319014
cg00319359
cg00319395
cg00319449
cg00319545
cg00319567
cg00319761
cg00320027
cg00320035
cg00320159
cg00320243
cg00320547
cg00320625
cg00320749
cg00320806
cg00320862
cg00321065
cg00321149
cg00321150
cg00321360
cg00321642
cg00321703
cg00321931
cg00322319
cg00322667
cg00322833
cg00322942
cg00322946
cg00323069
cg00323100
cg00323266
cg00323305
cg00323316
cg00323359
cg00323448
cg00323535
cg00323631
cg00323695
cg00323965
cg00324161
cg00324562
cg00324693
cg00324733
cg00325149
cg00325350
cg00325390
cg00325458
cg00325599
cg00325750
cg00325866
cg00325904
cg00325919
cg00326127
cg00326259
cg00326719
cg00326813
cg00327185
cg00327211
cg00327506
cg00327537
cg00328051
cg00328075
cg00328418
cg00328593
cg00328883
cg00328901
cg00328972
cg00329014
cg00329039
cg00329097
cg00329154
cg00329237
cg00329270
cg00329697
cg00329748
cg00329943
cg00330279
cg00330464
cg00330502
cg00330888
cg00330936
cg00331096
cg00331237
cg00331343
cg00332155
cg00332212
cg00332249
cg00332575
cg00332680
cg00332745
cg00332877
cg00333034
cg00333142
cg00333154
cg00333315
cg00333512
cg00333824
cg00333985
cg00334245
cg00334257
cg00334370
cg00334542
cg00334798
cg00334820
cg00335003
cg00335310
cg00335633
cg00335712
cg00336071
cg00336150
cg00336605
cg00336706
cg00336887
cg00337053
cg00337662
cg00337821
cg00337905
cg00338080
cg00338083
cg00338116
cg00338122
cg00338229
cg00338296
cg00338460
cg00338702
cg00338801
cg00338928
cg00339104
cg00339195
cg00339300
[truncated: 144,385 more rows]
